# Supplementary material for: In-depth human plasma proteome analysis captures tissue proteins and transfer of protein variants across the placenta
Source: PubMed Central journal article supplement (PMC6519984; doi:10.7554/elife.41608), 2019-04-08

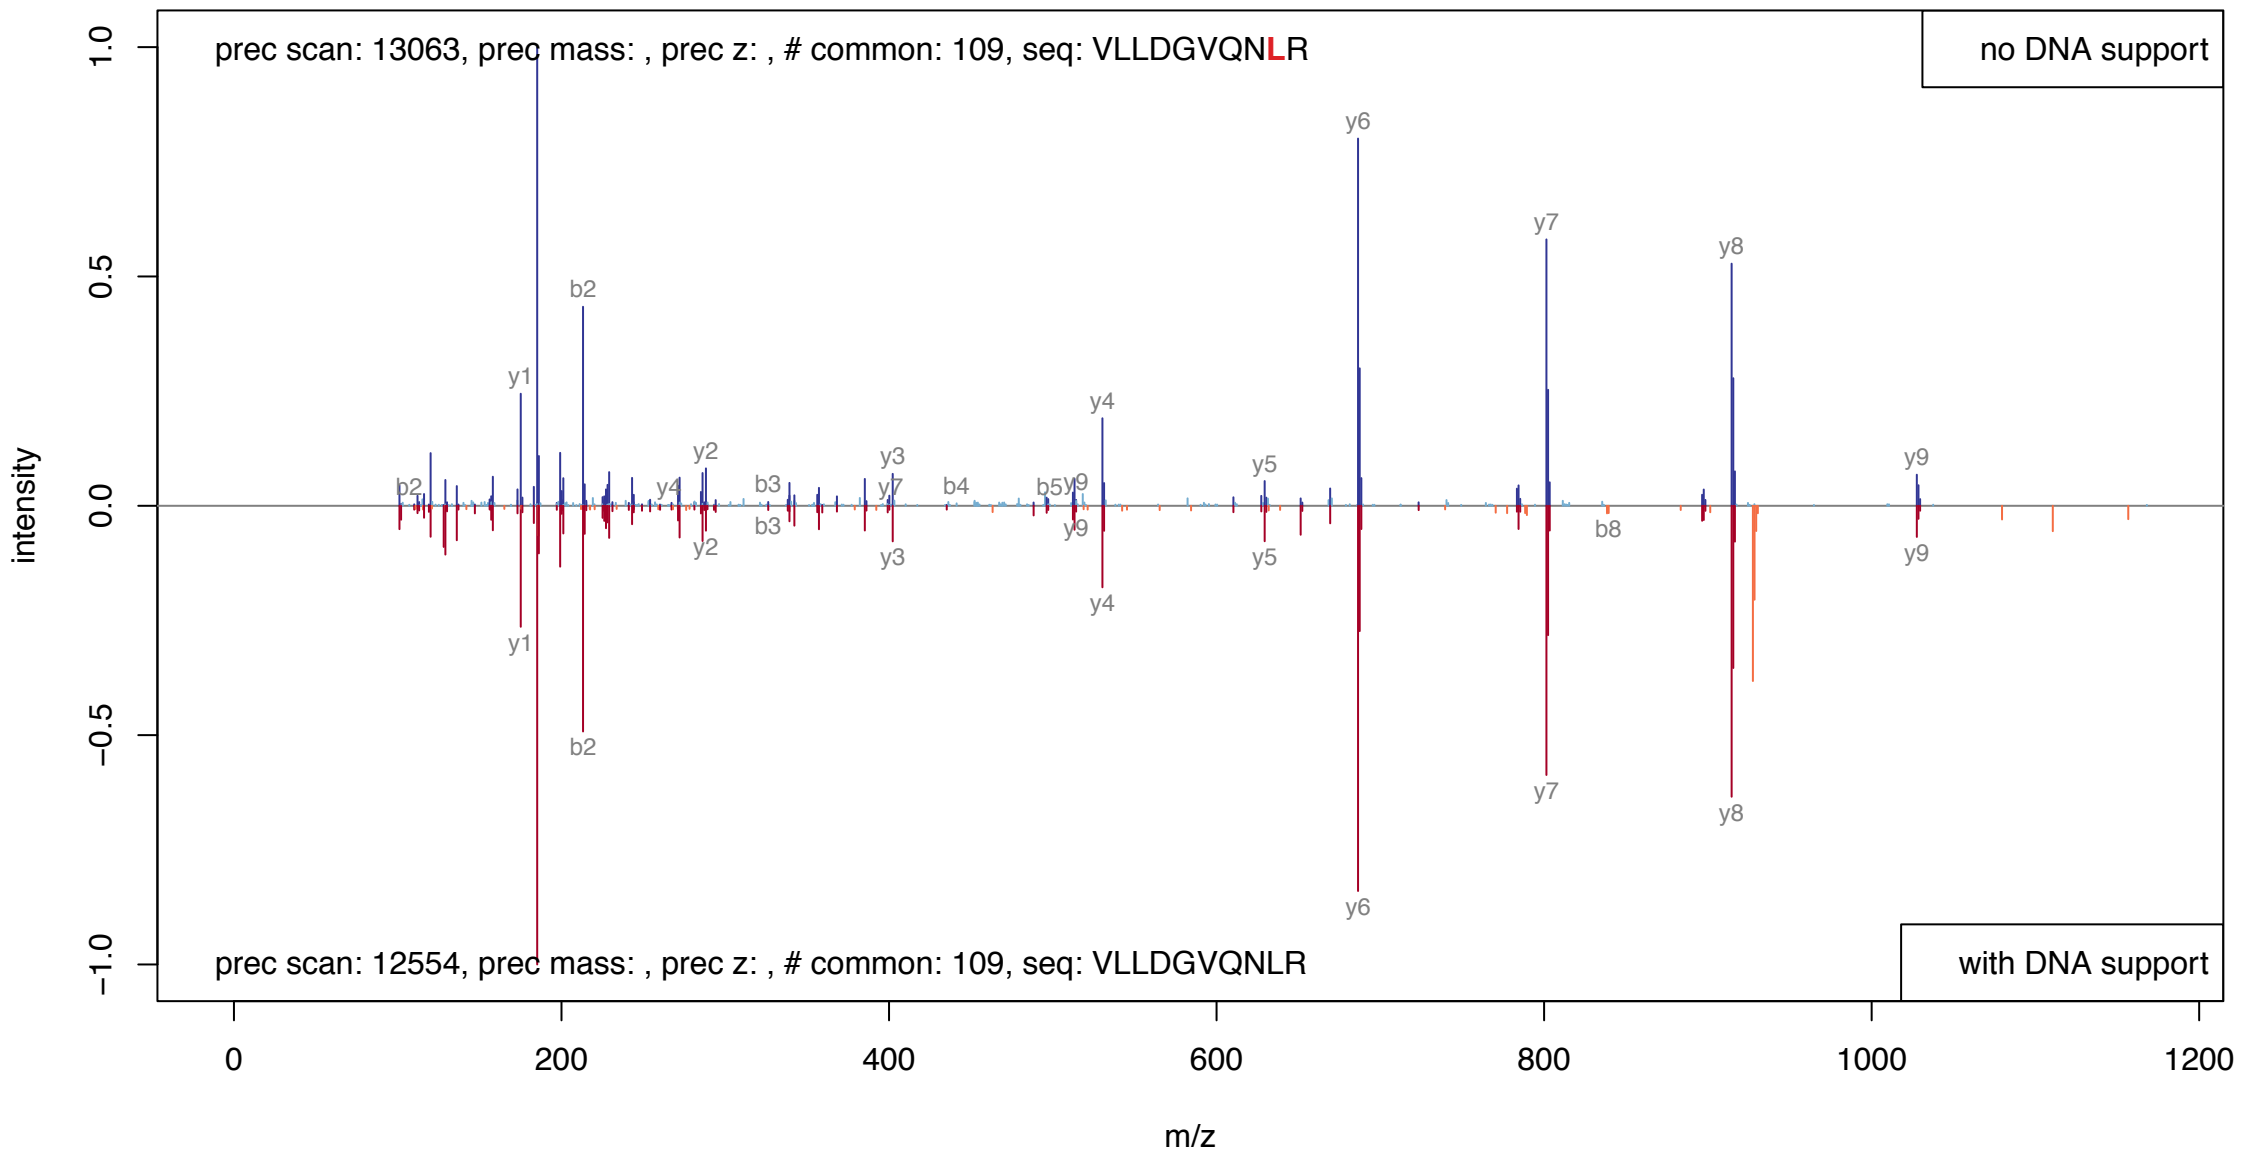

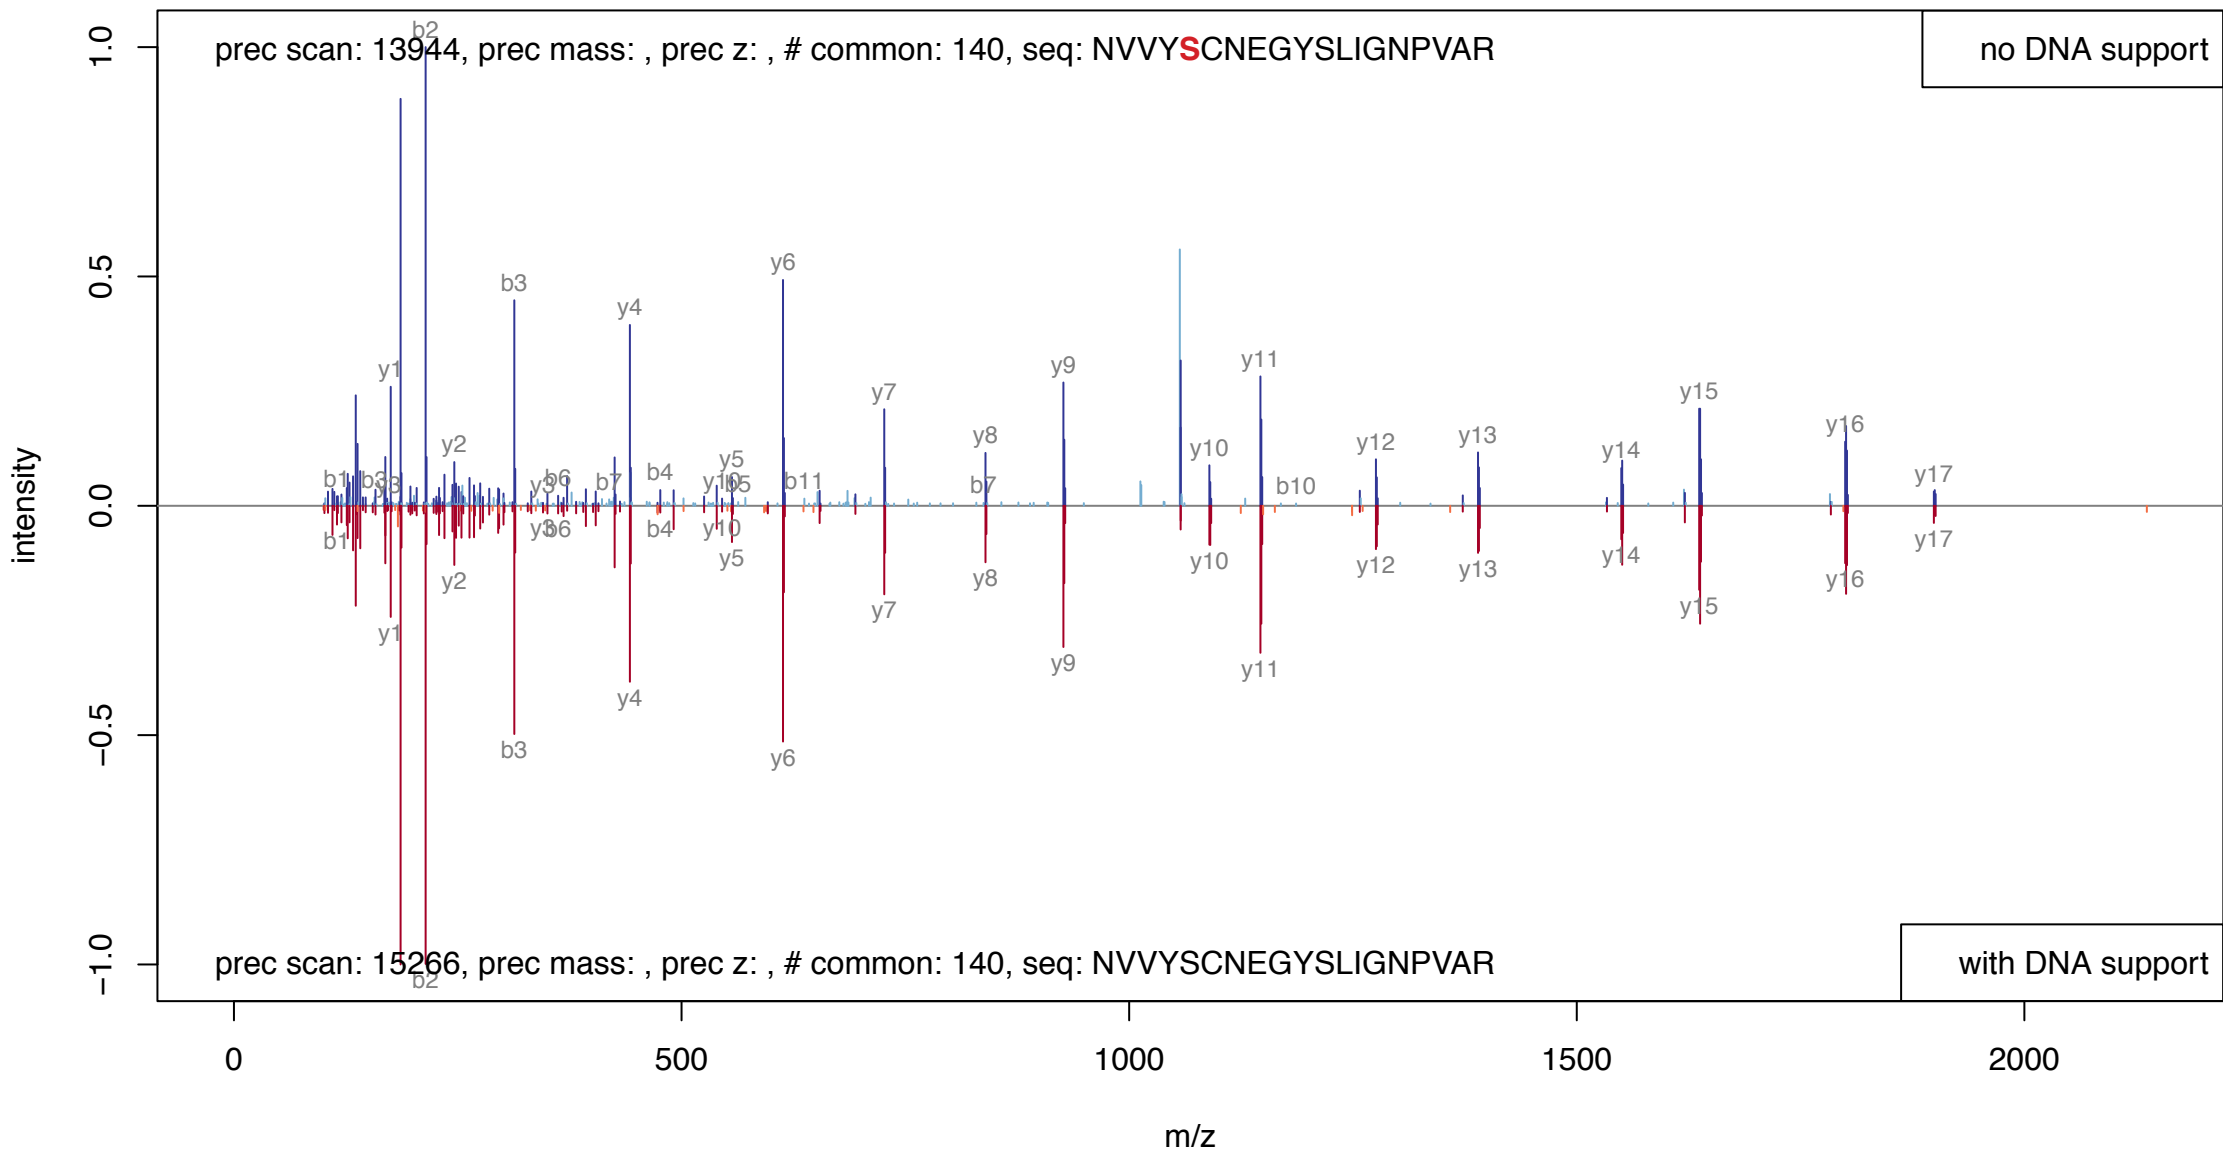

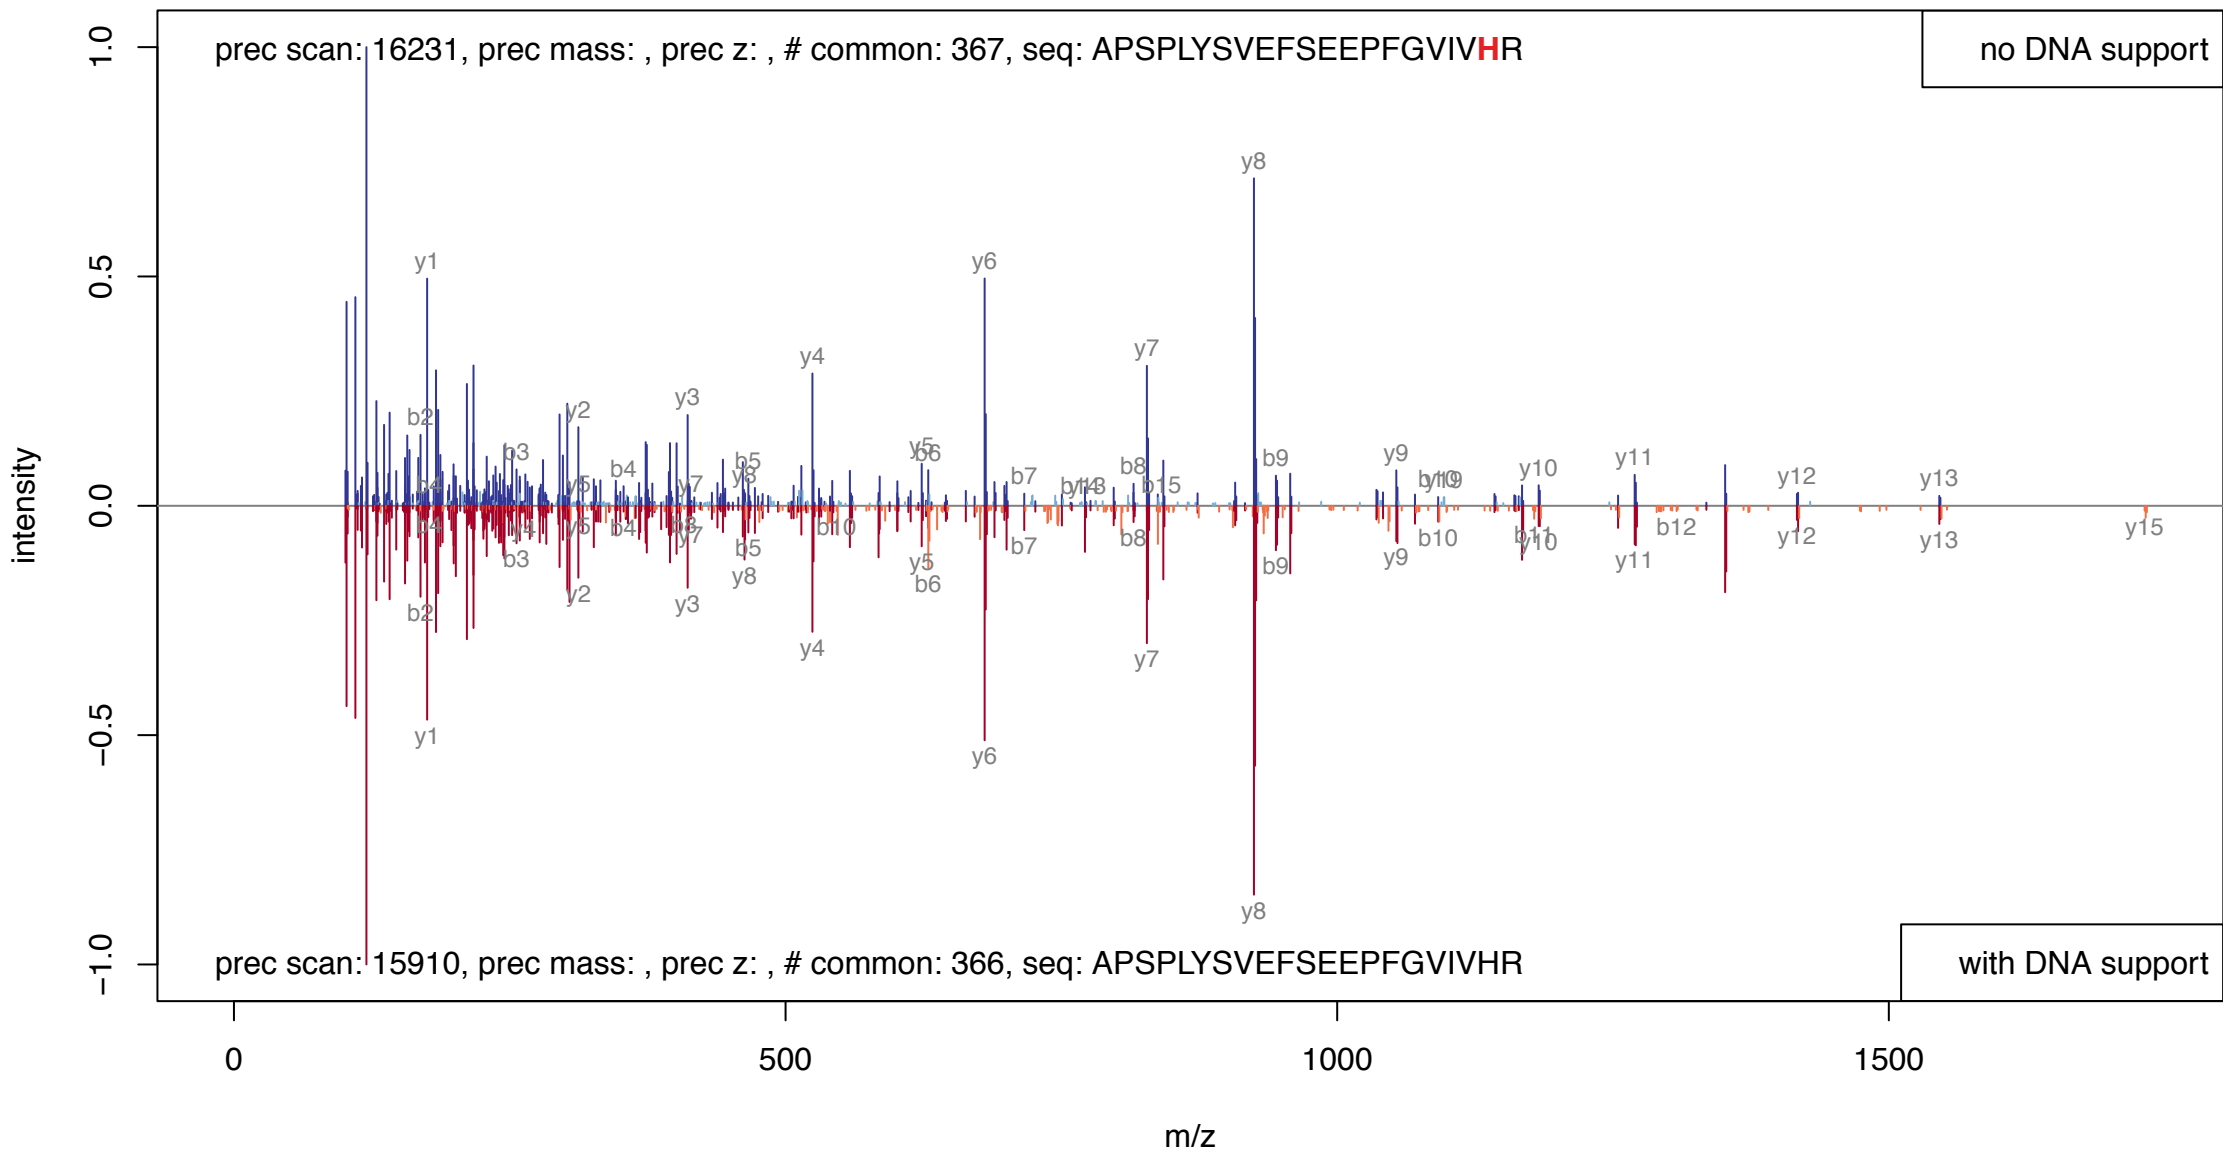

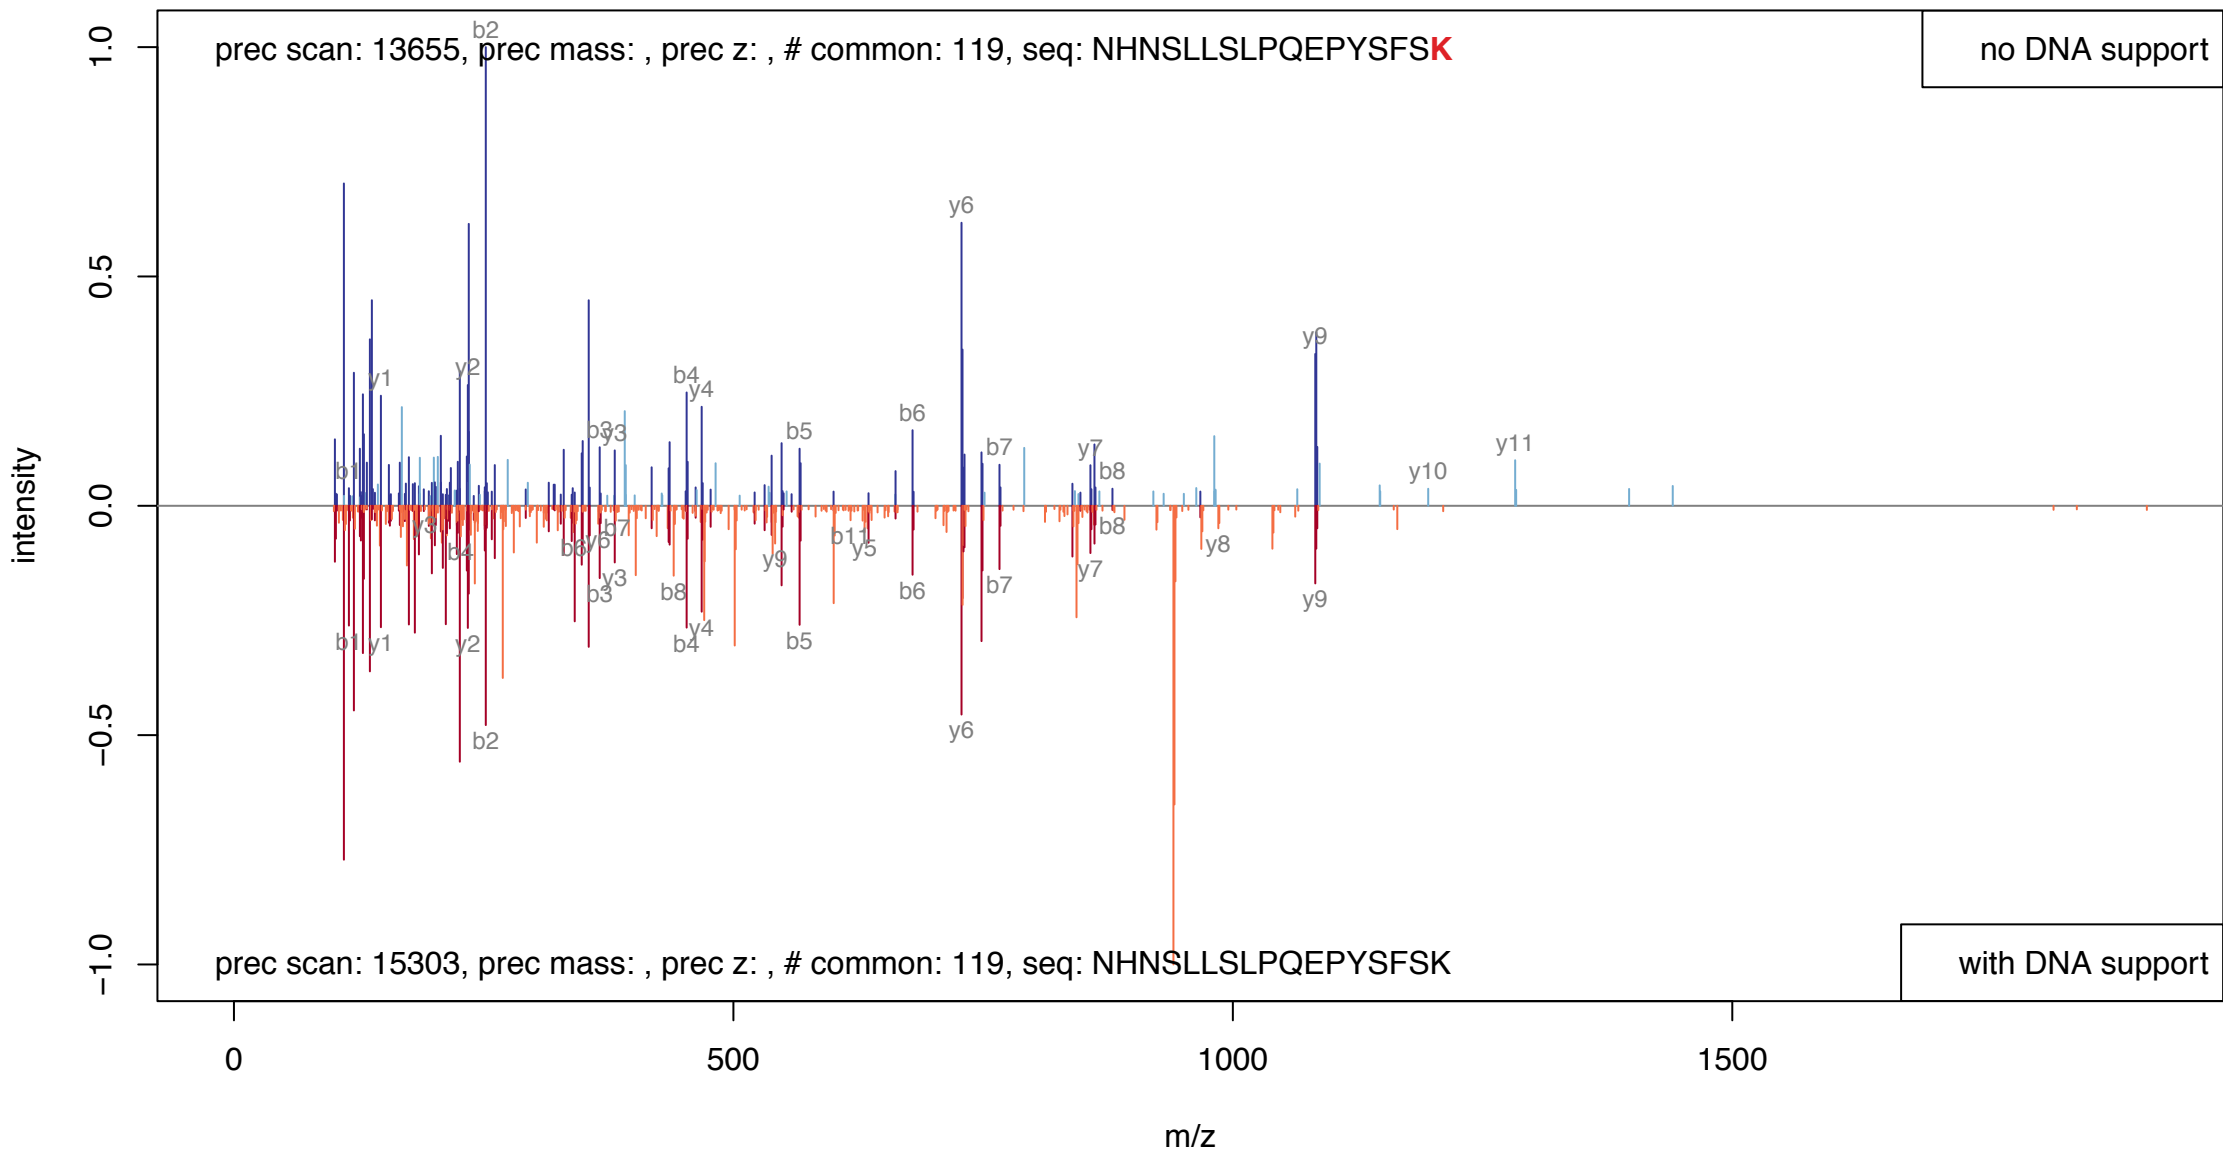

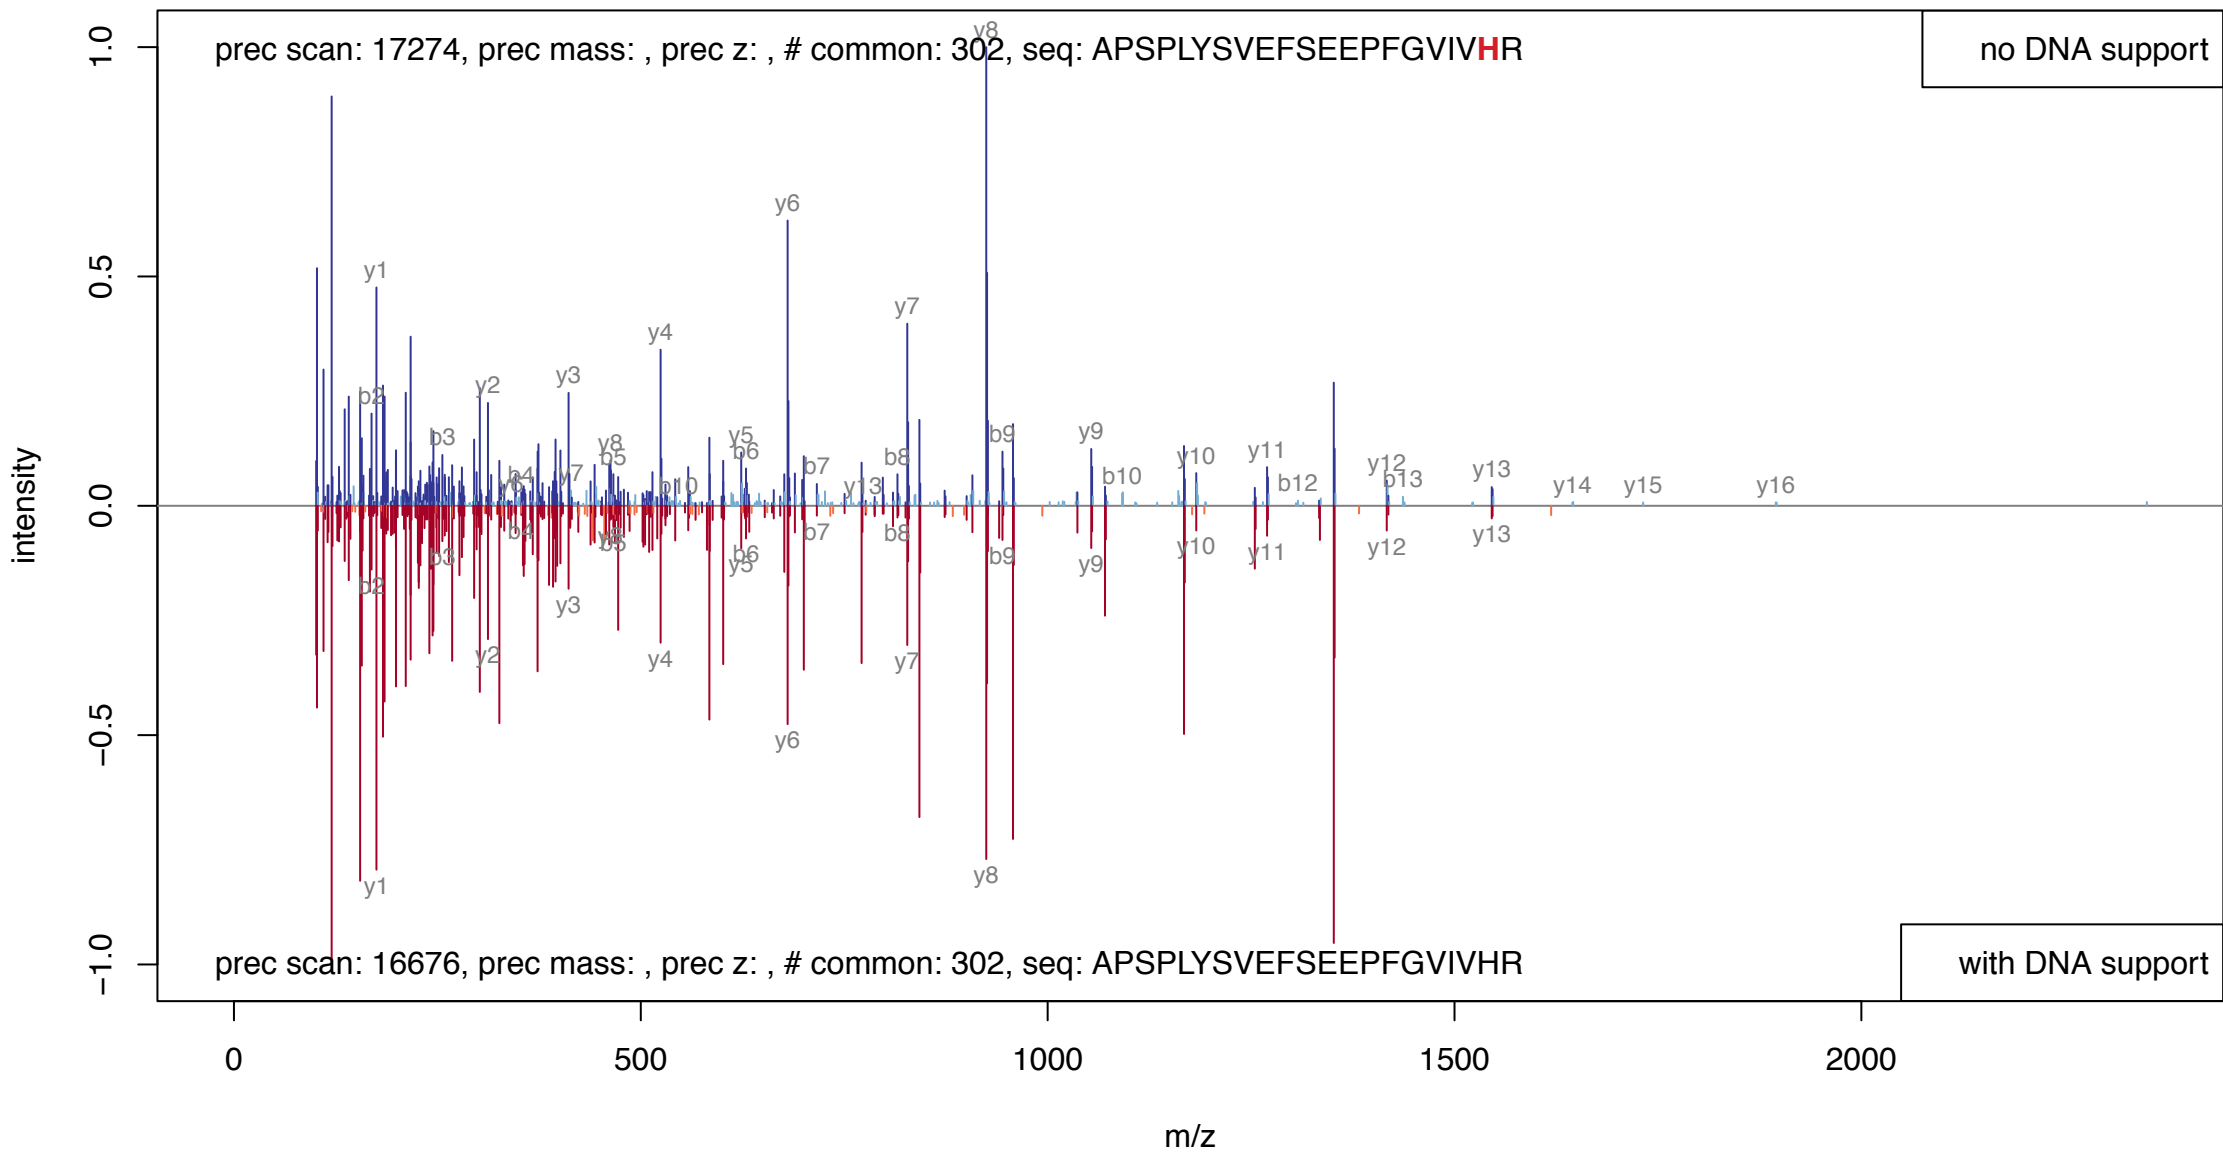

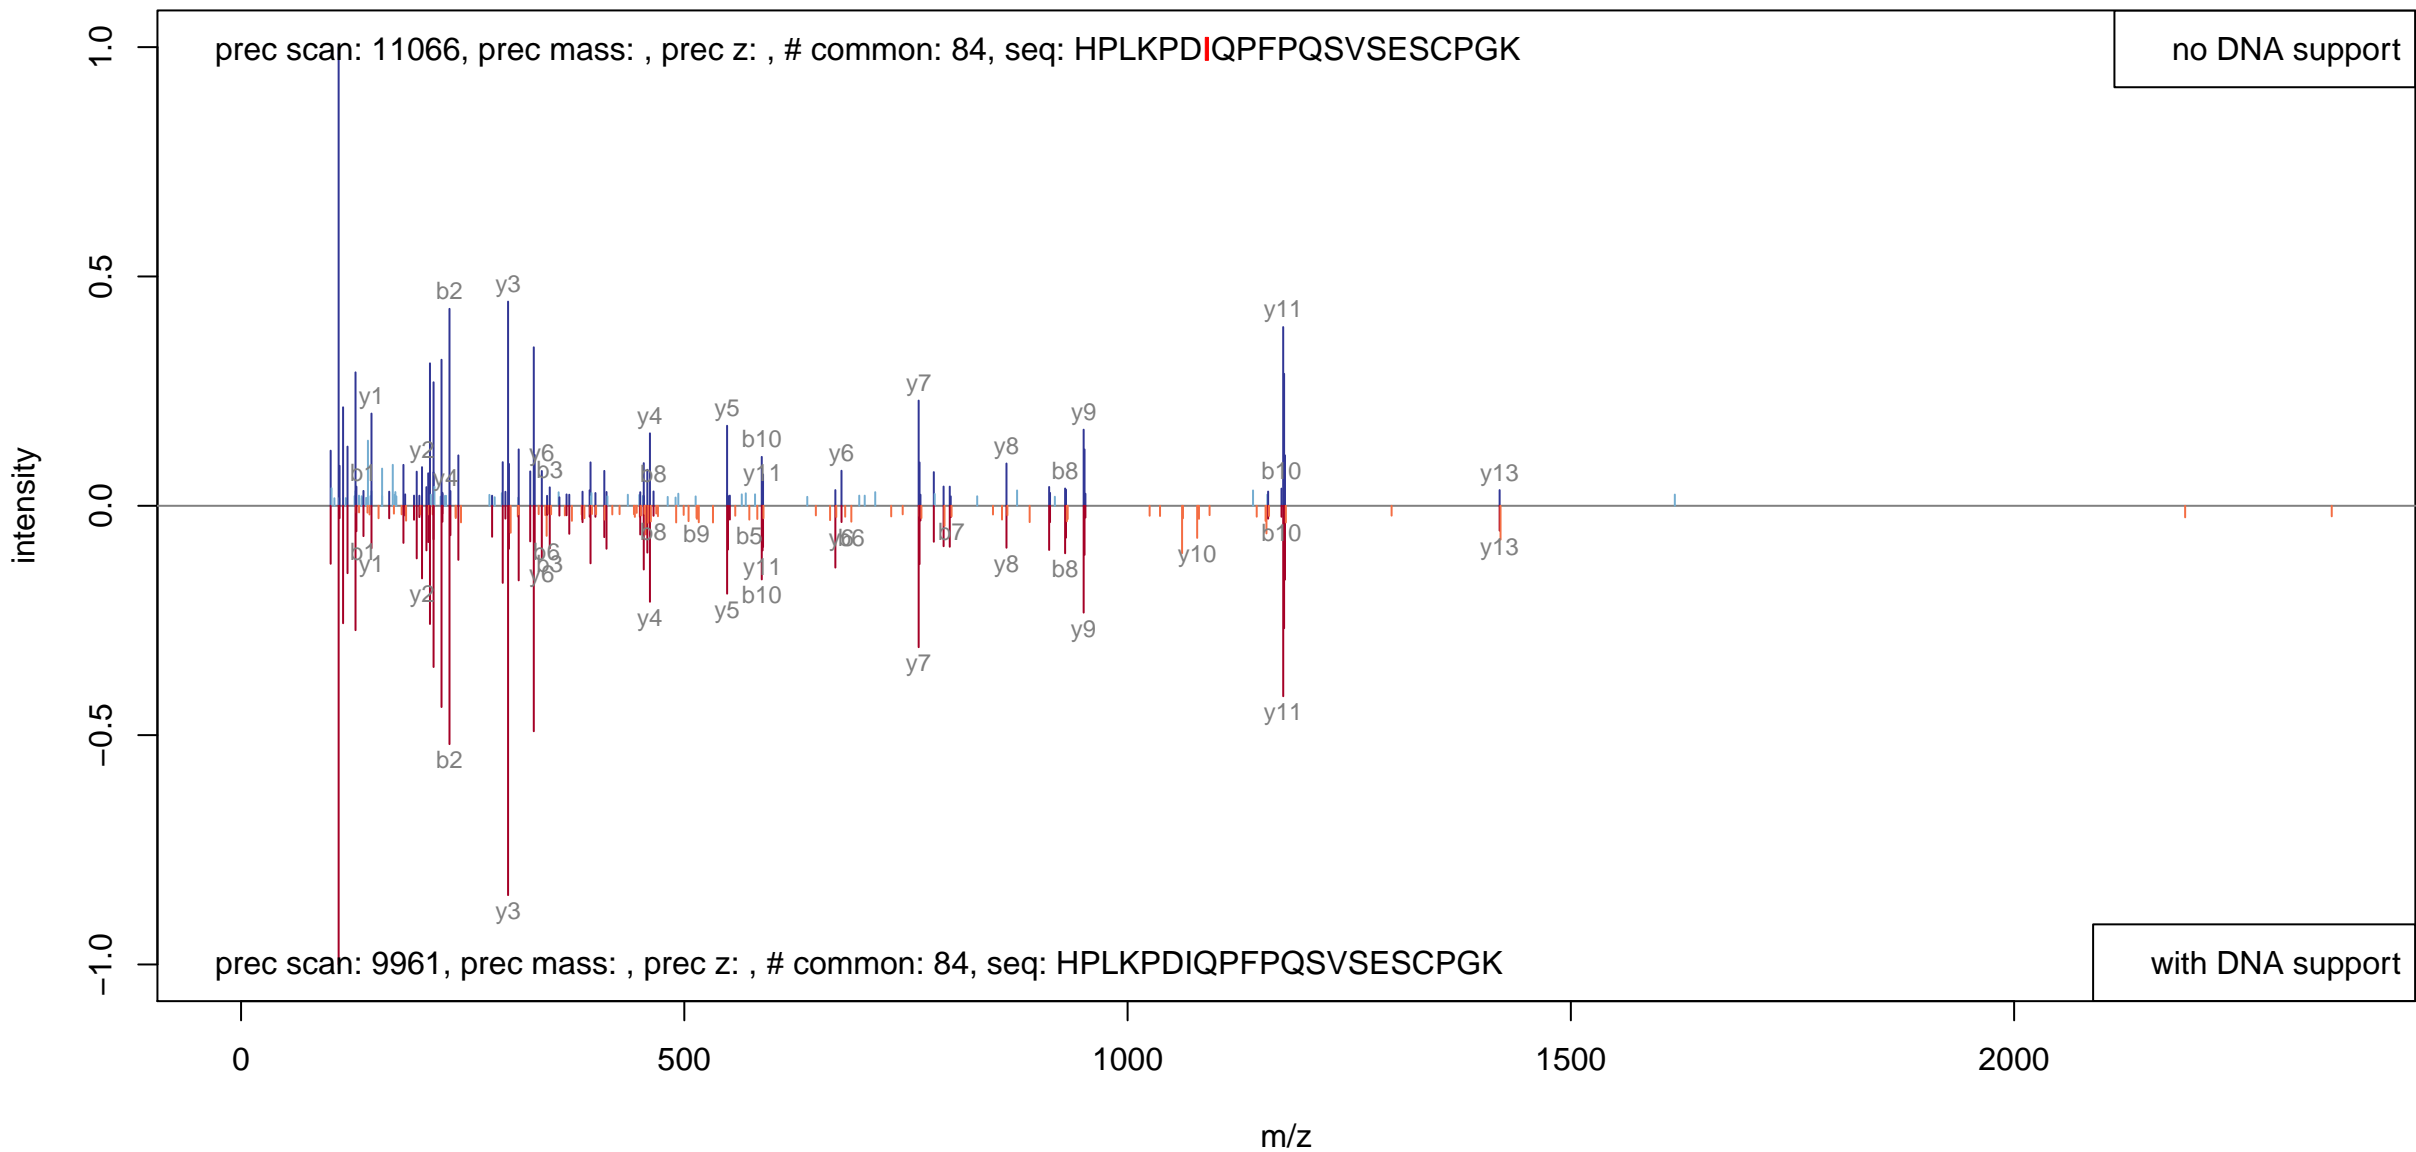

Incorrect match

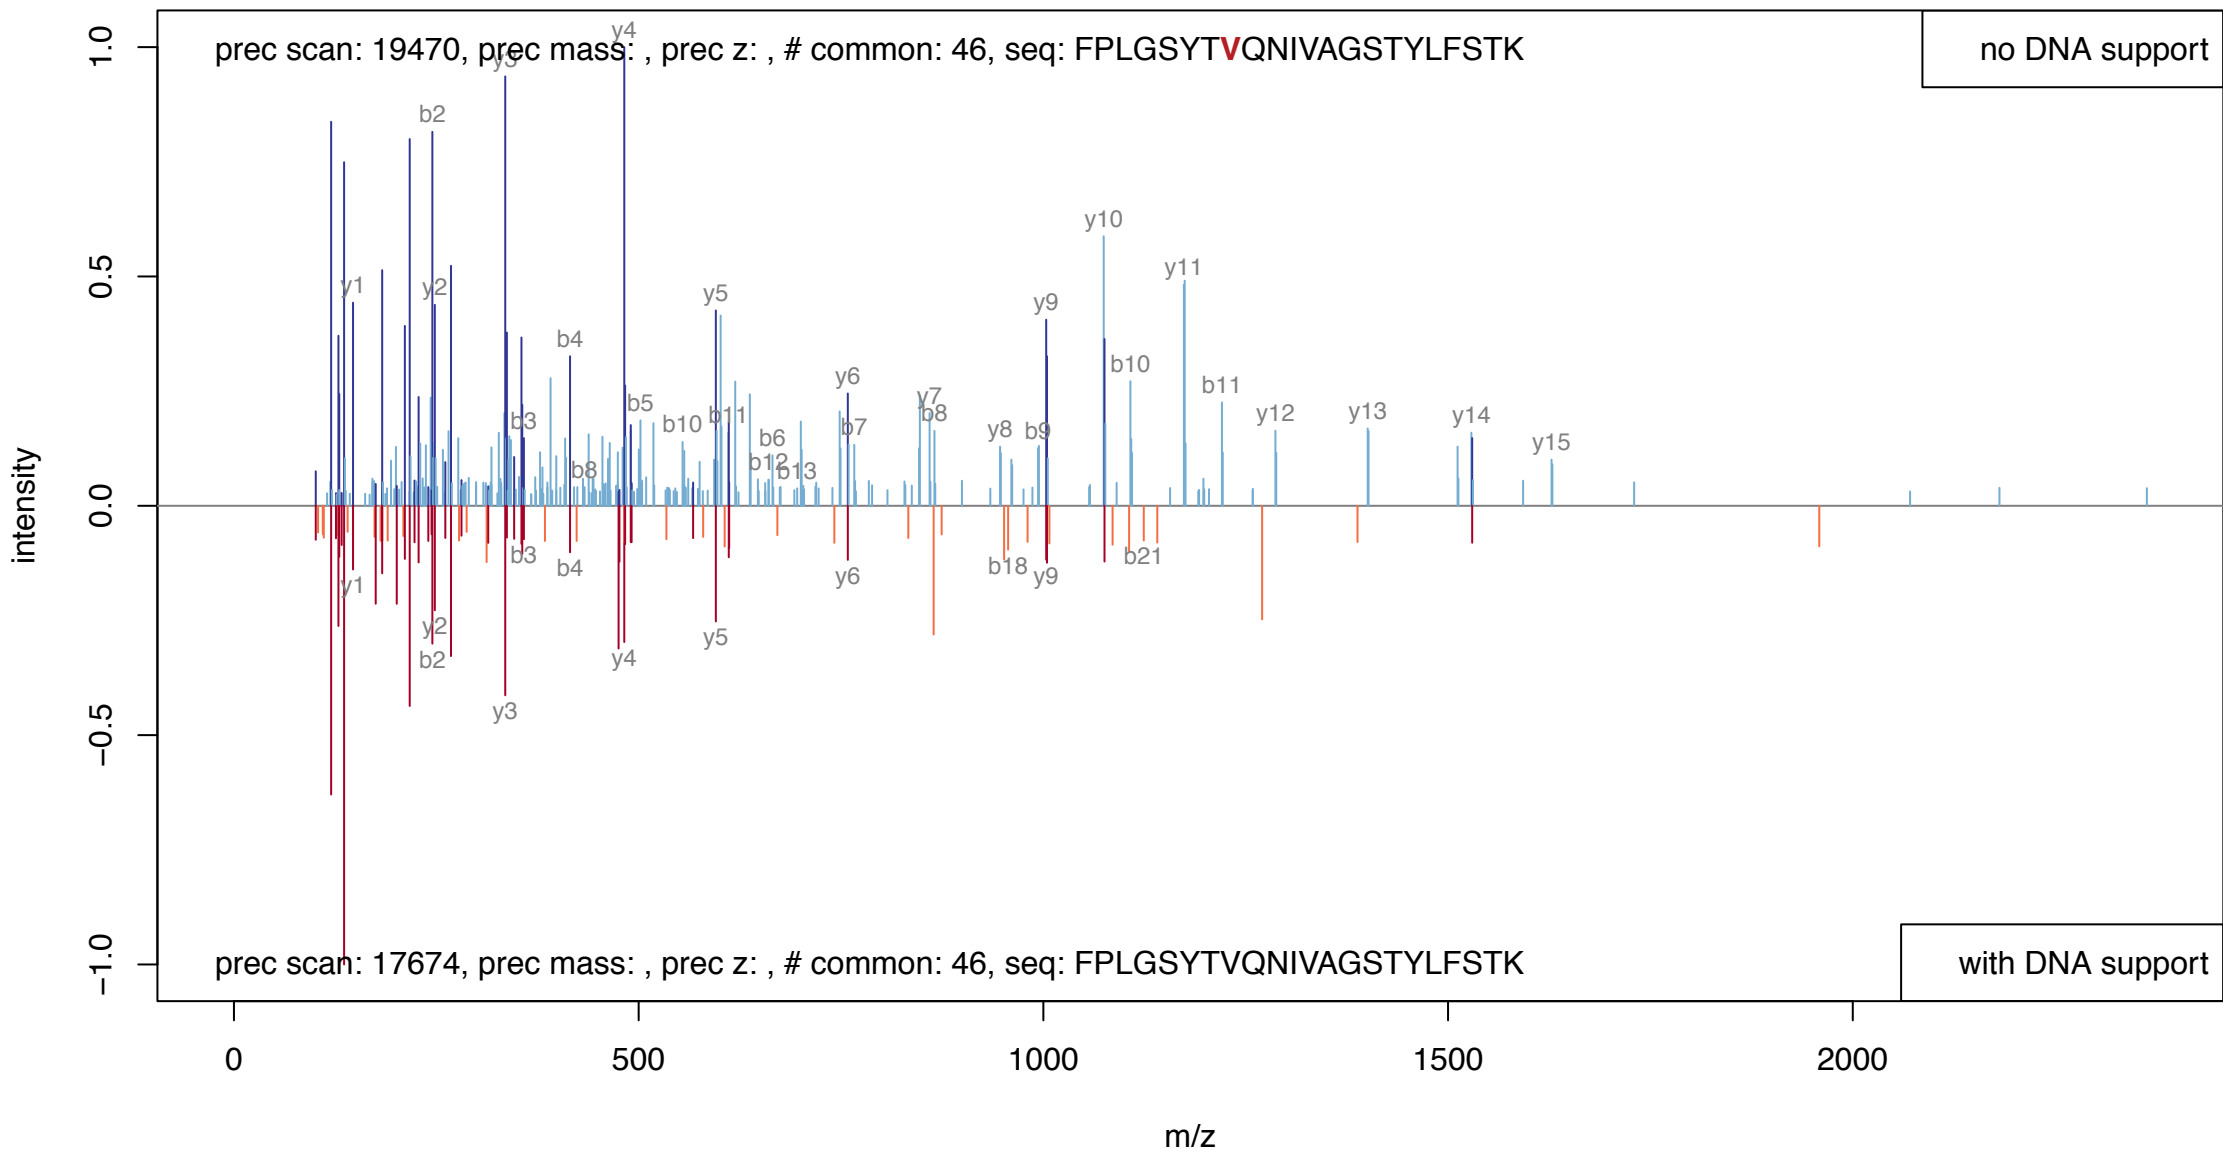

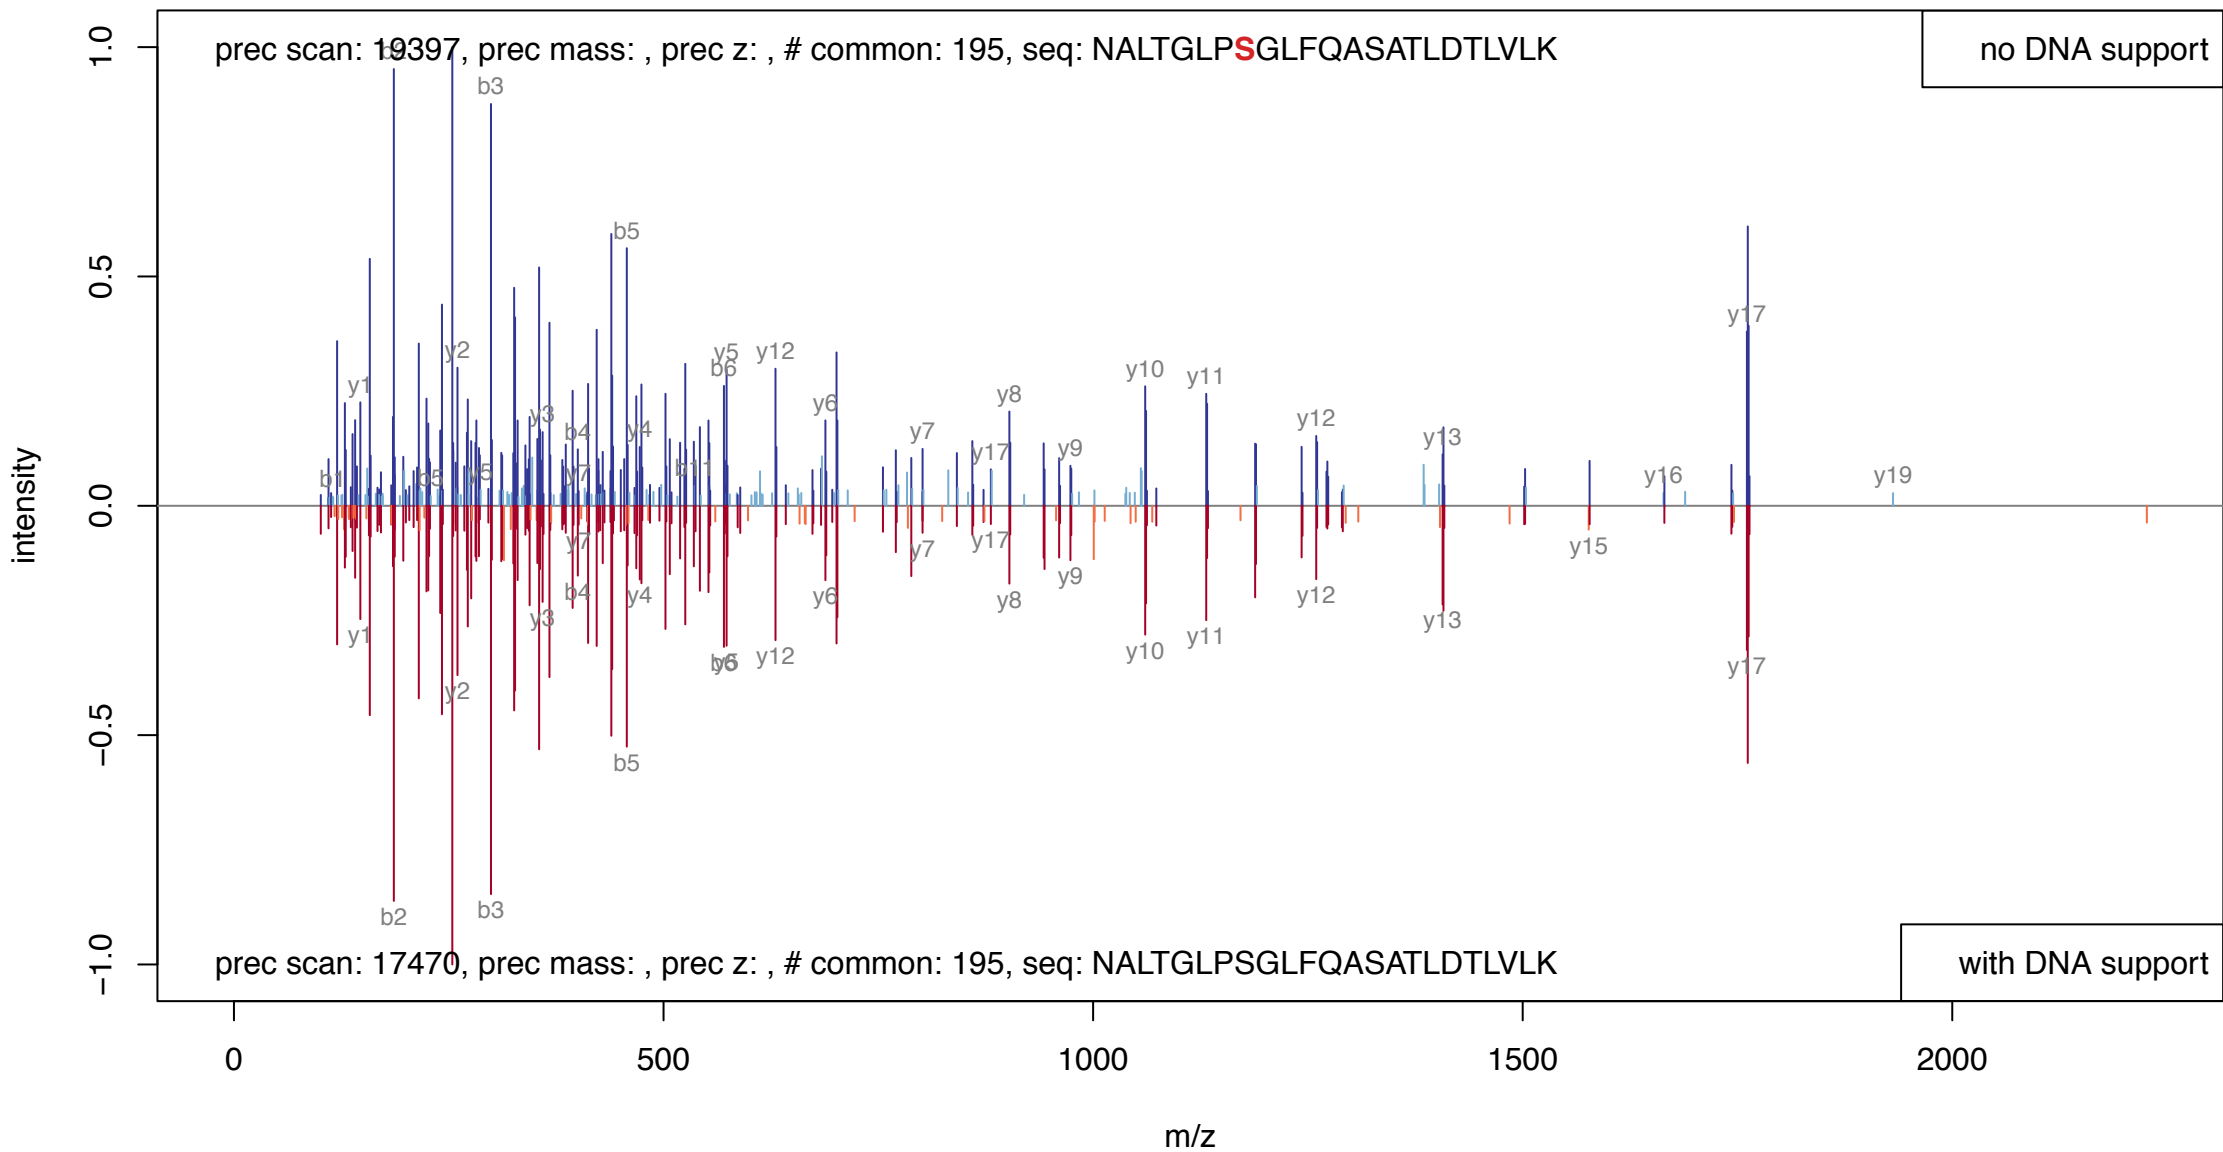



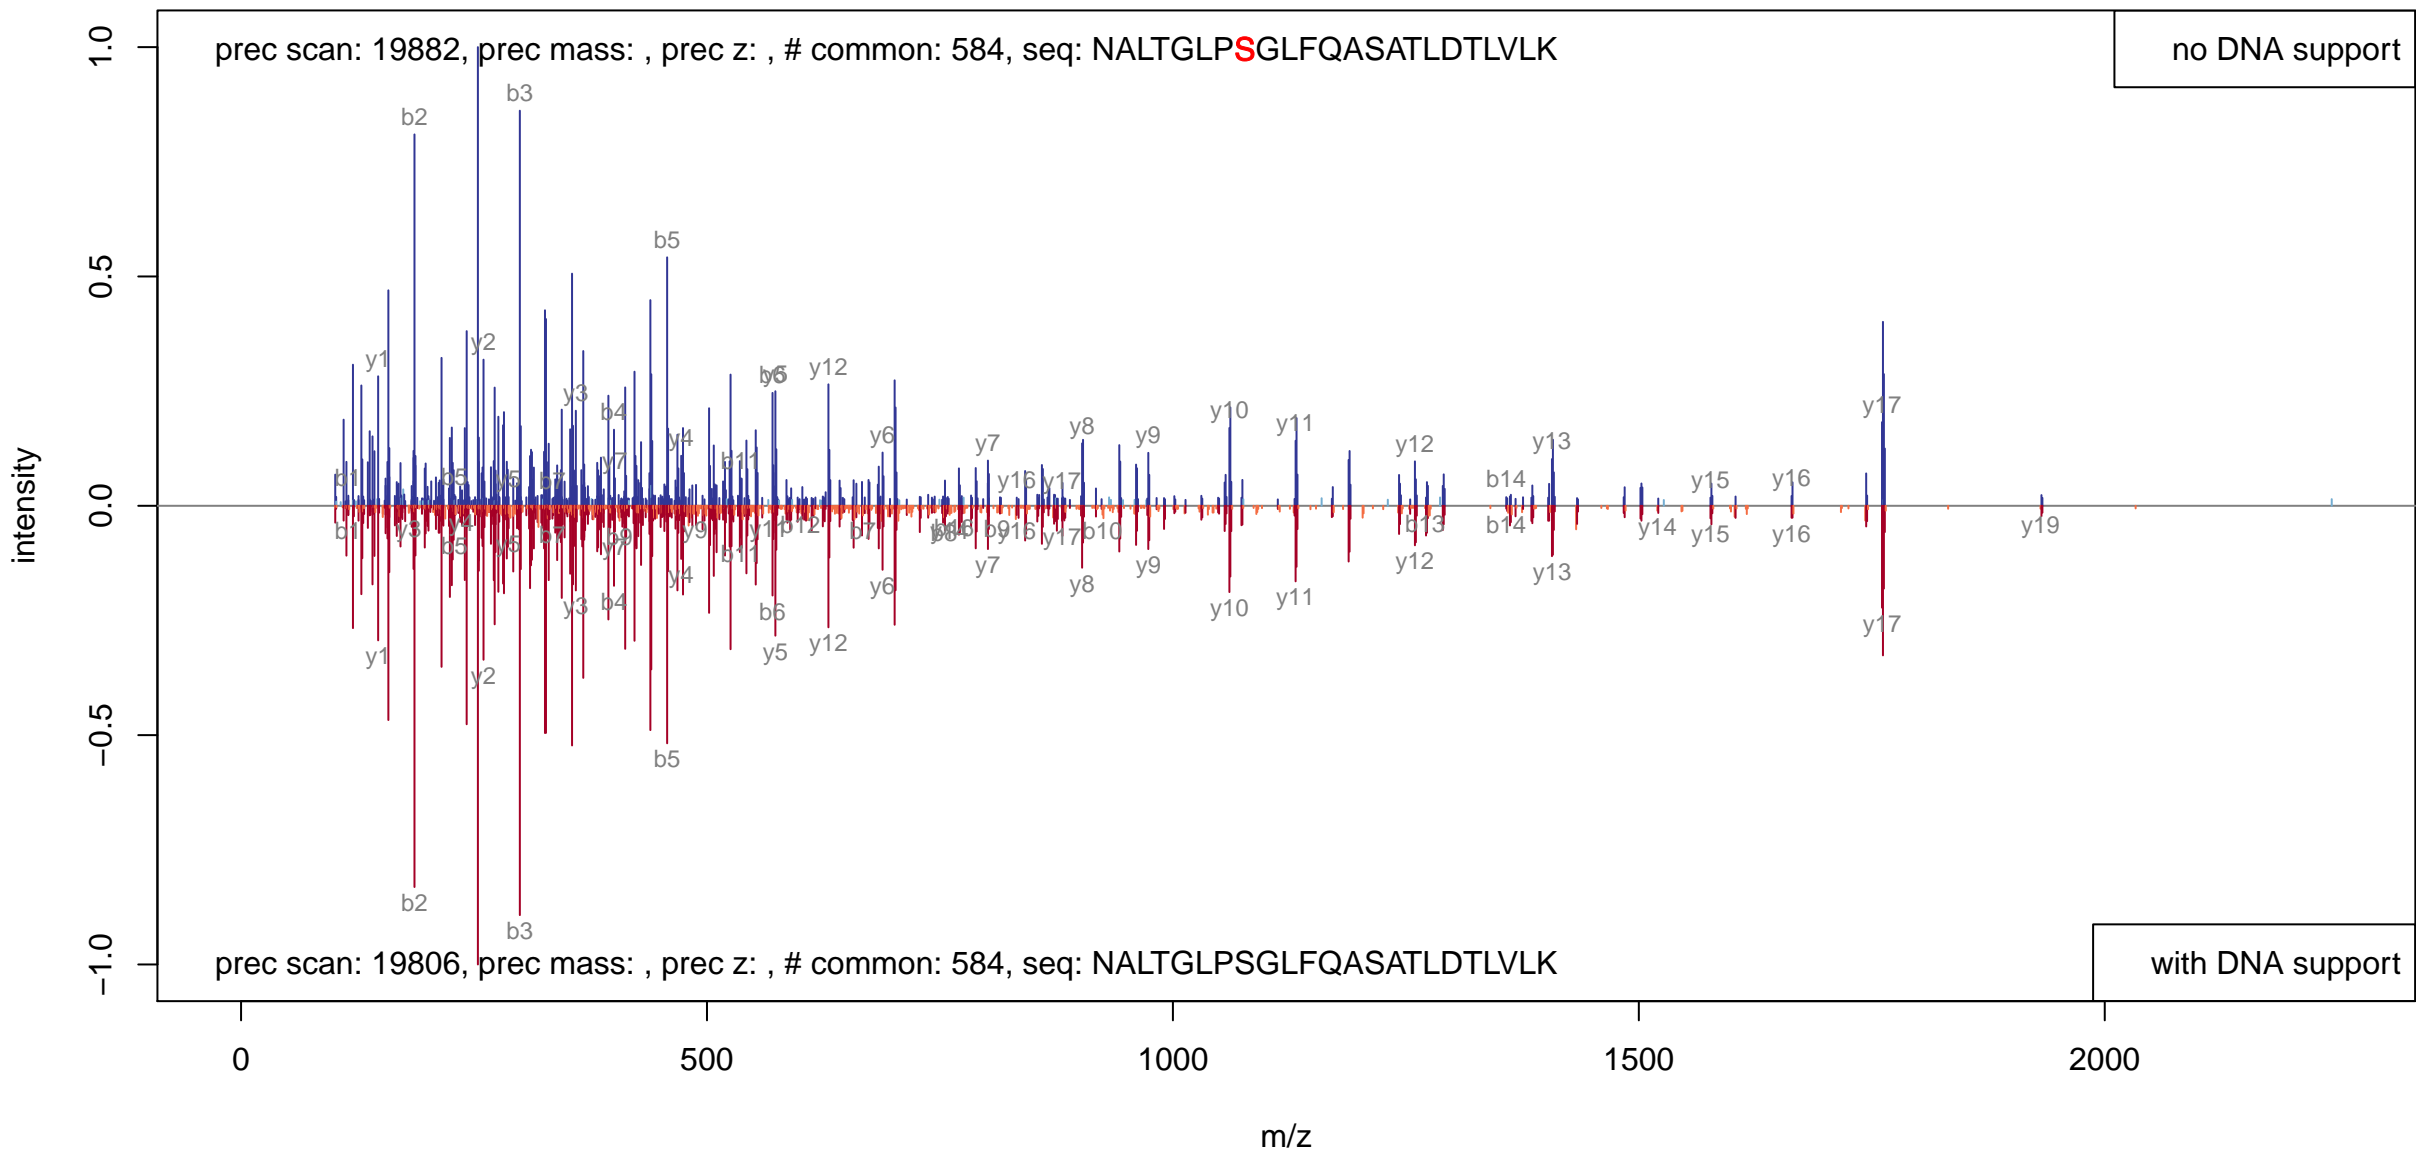

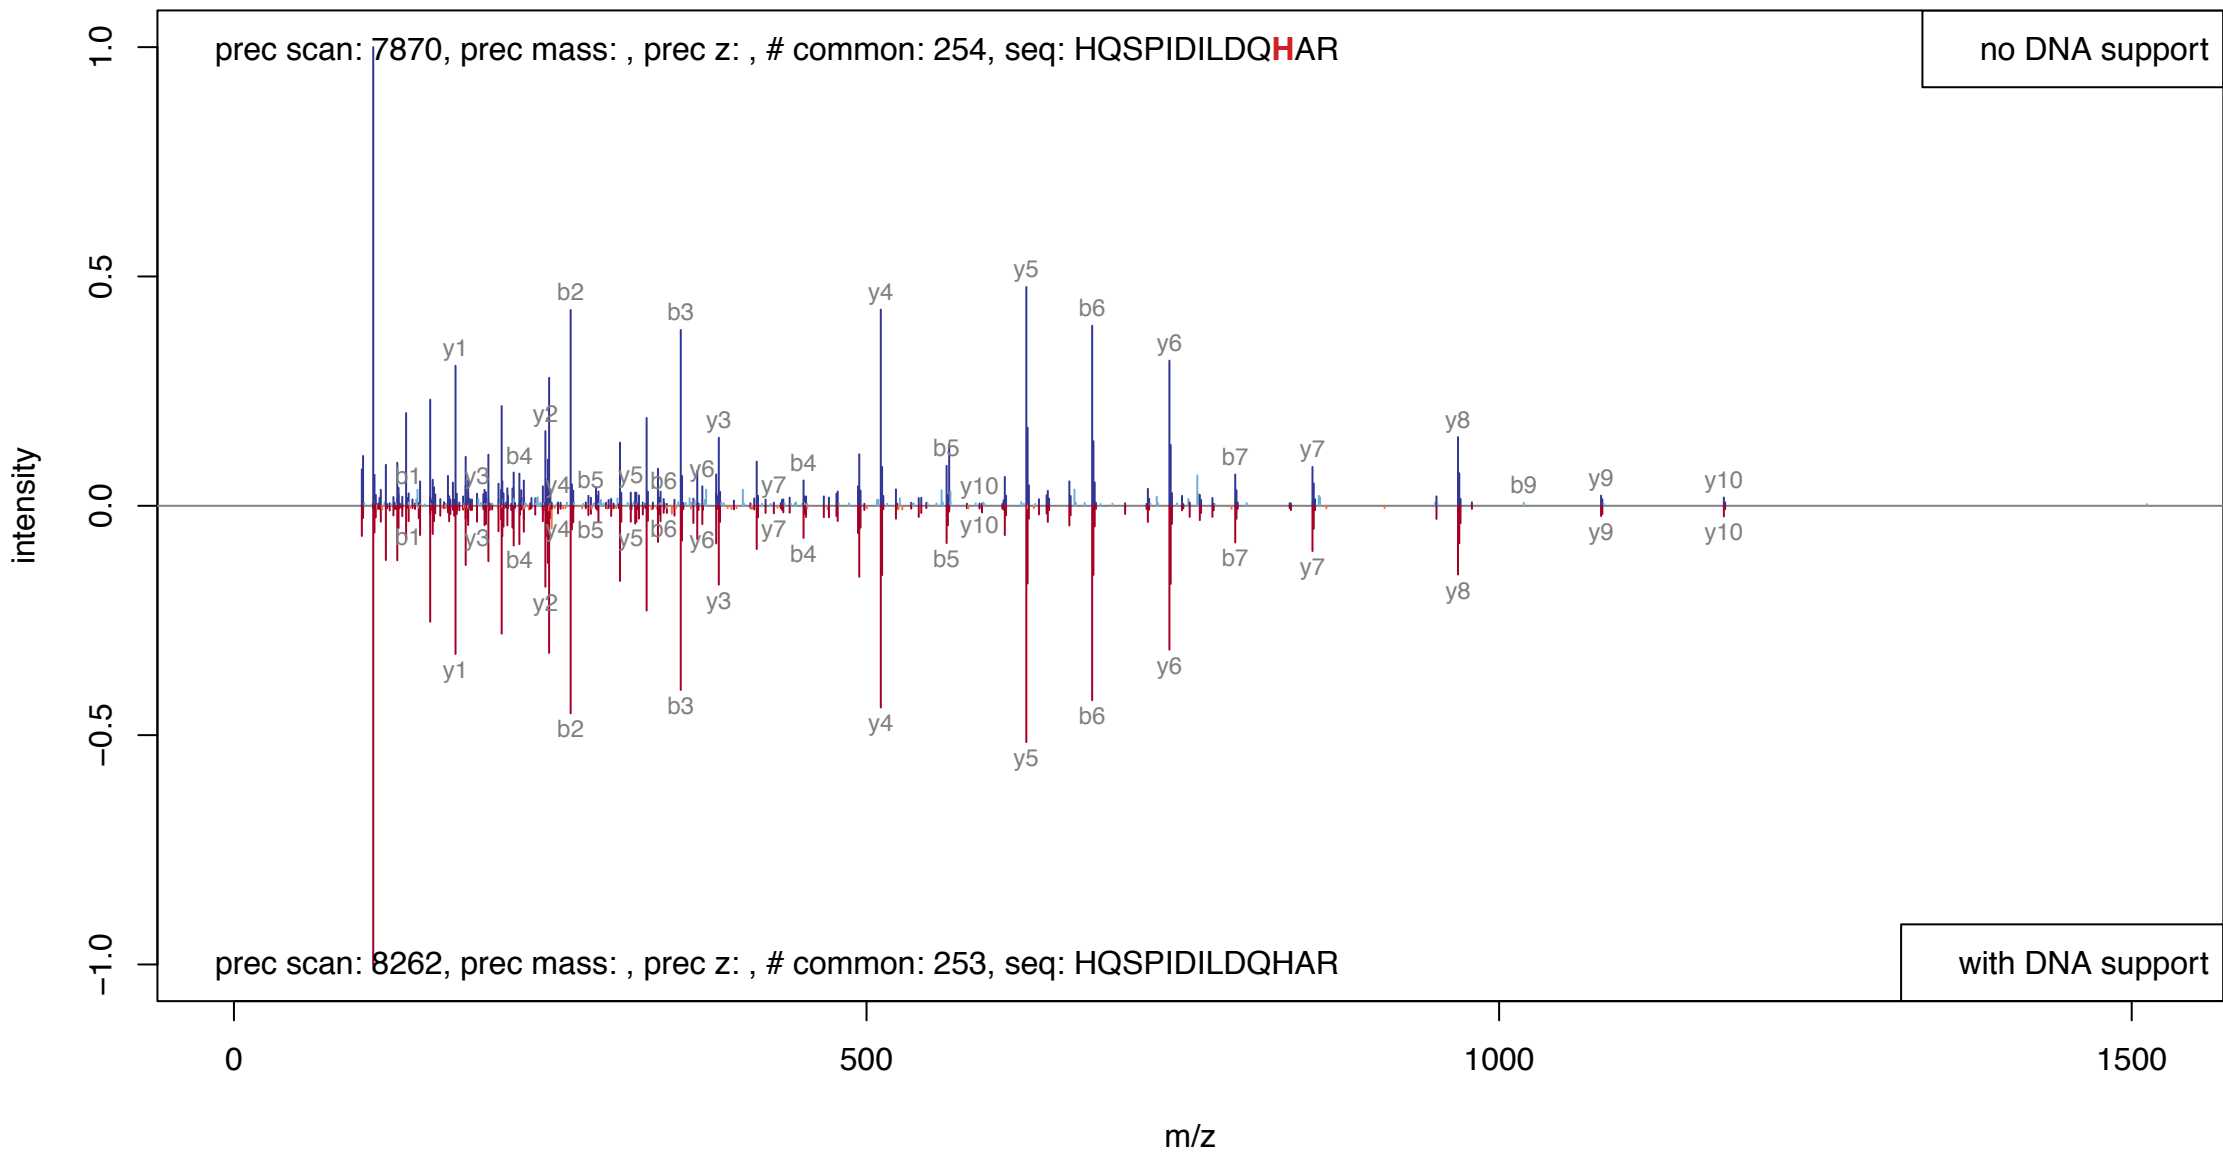

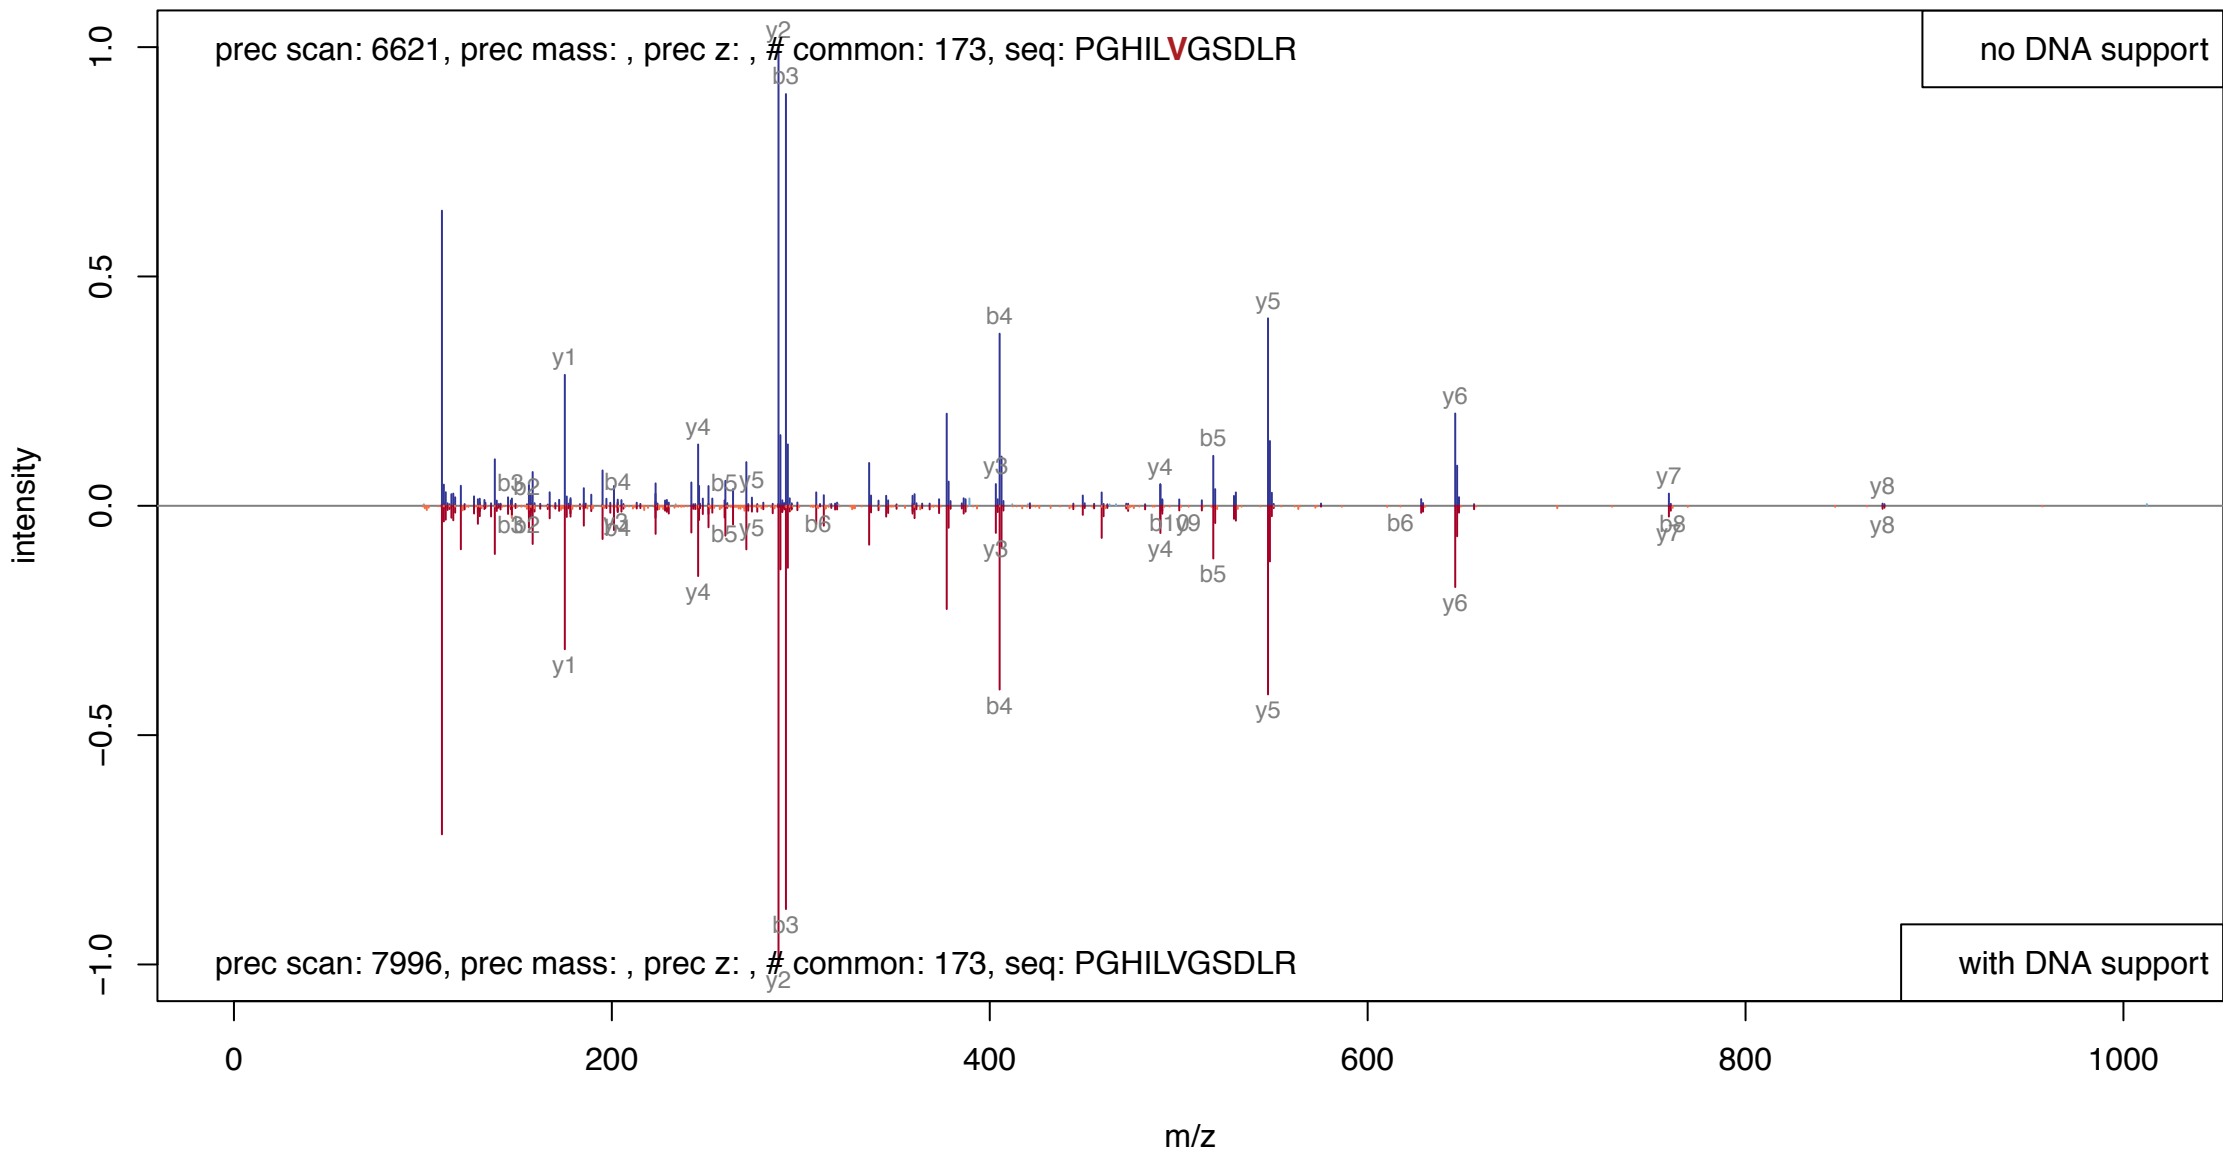

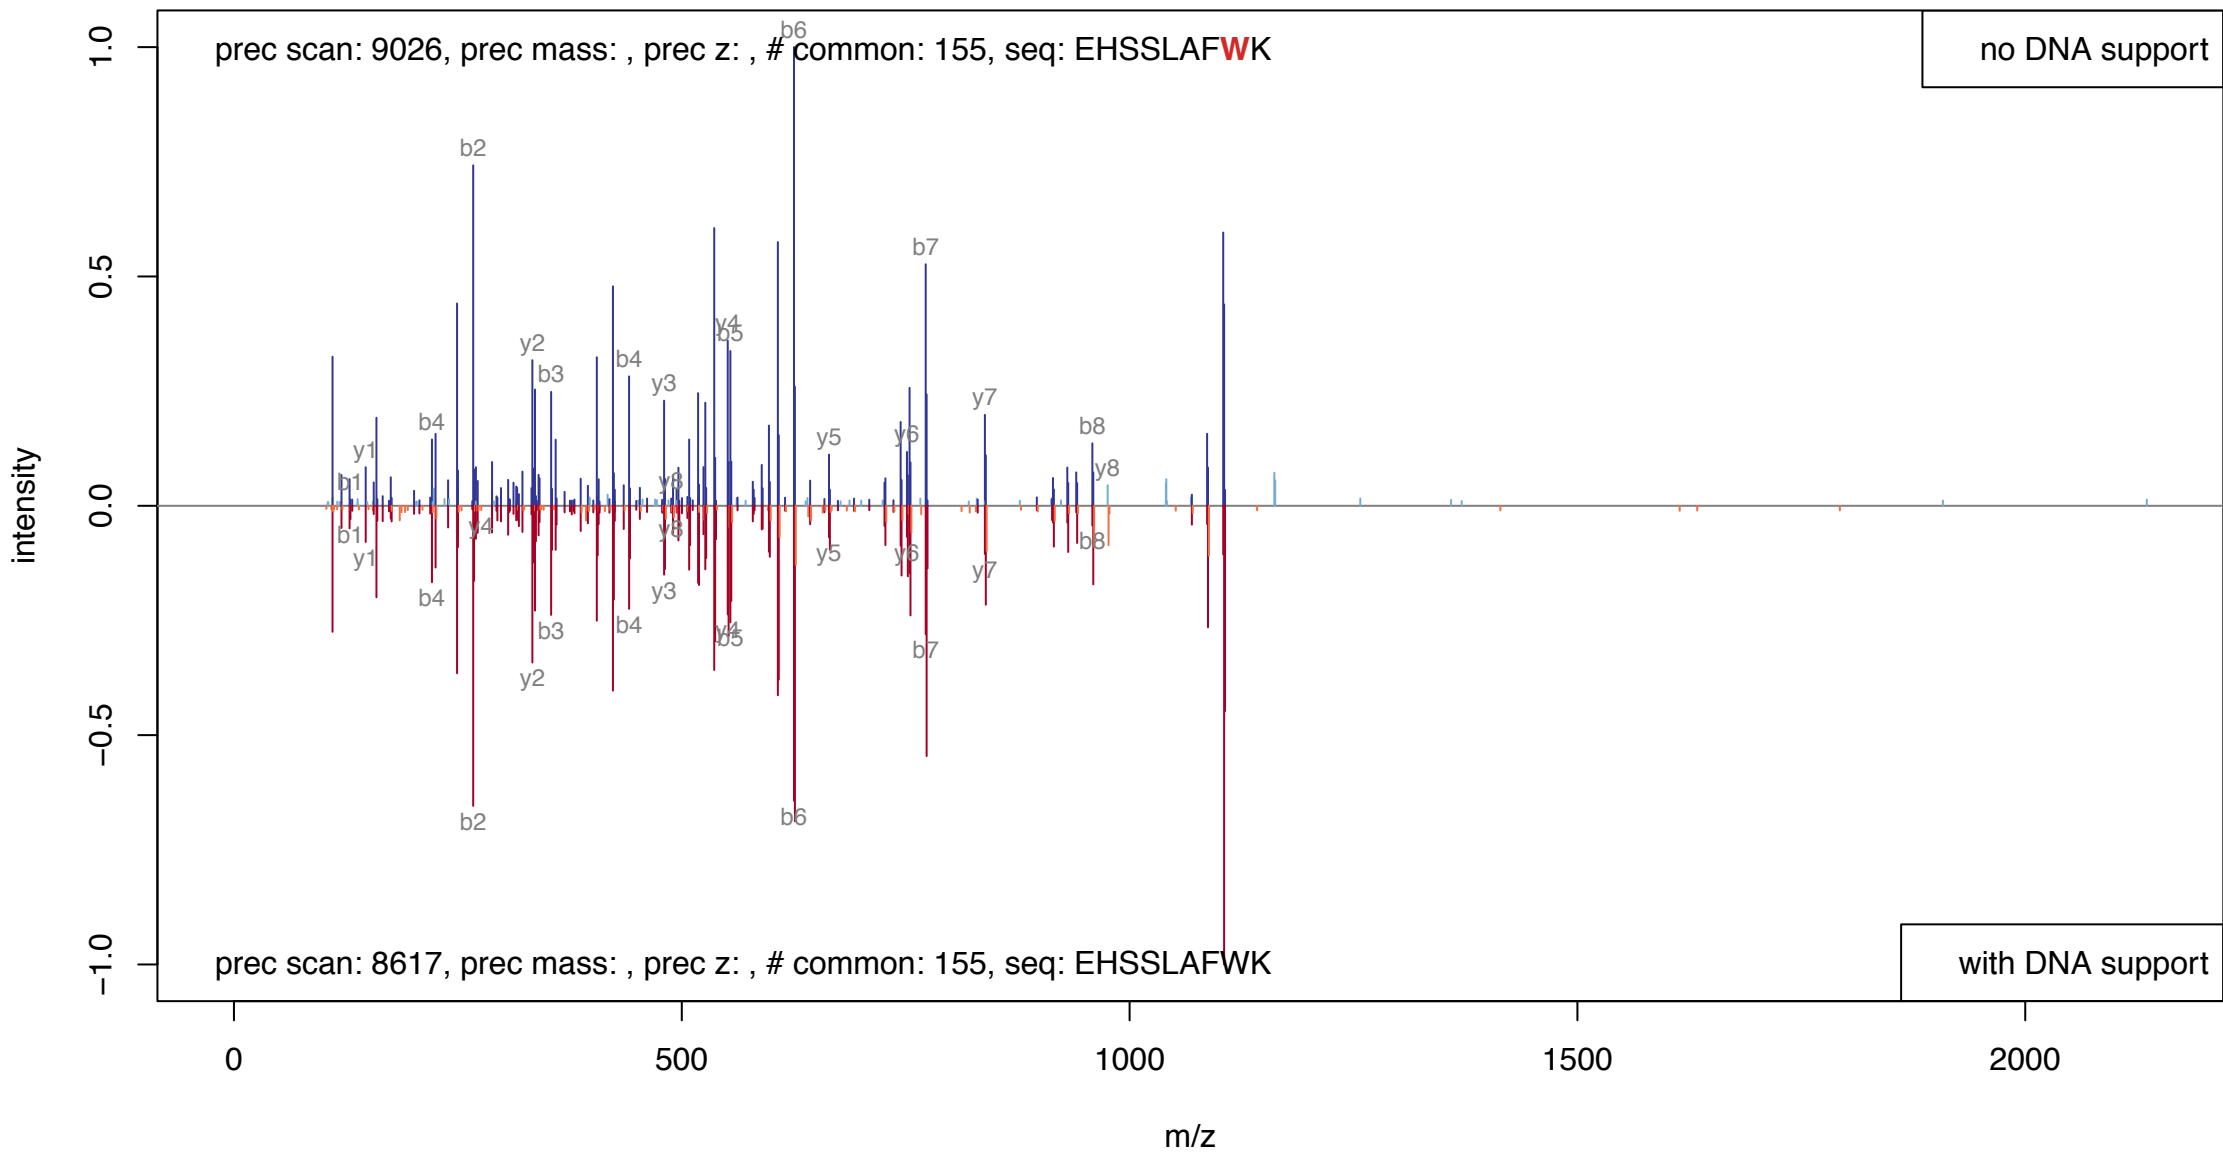

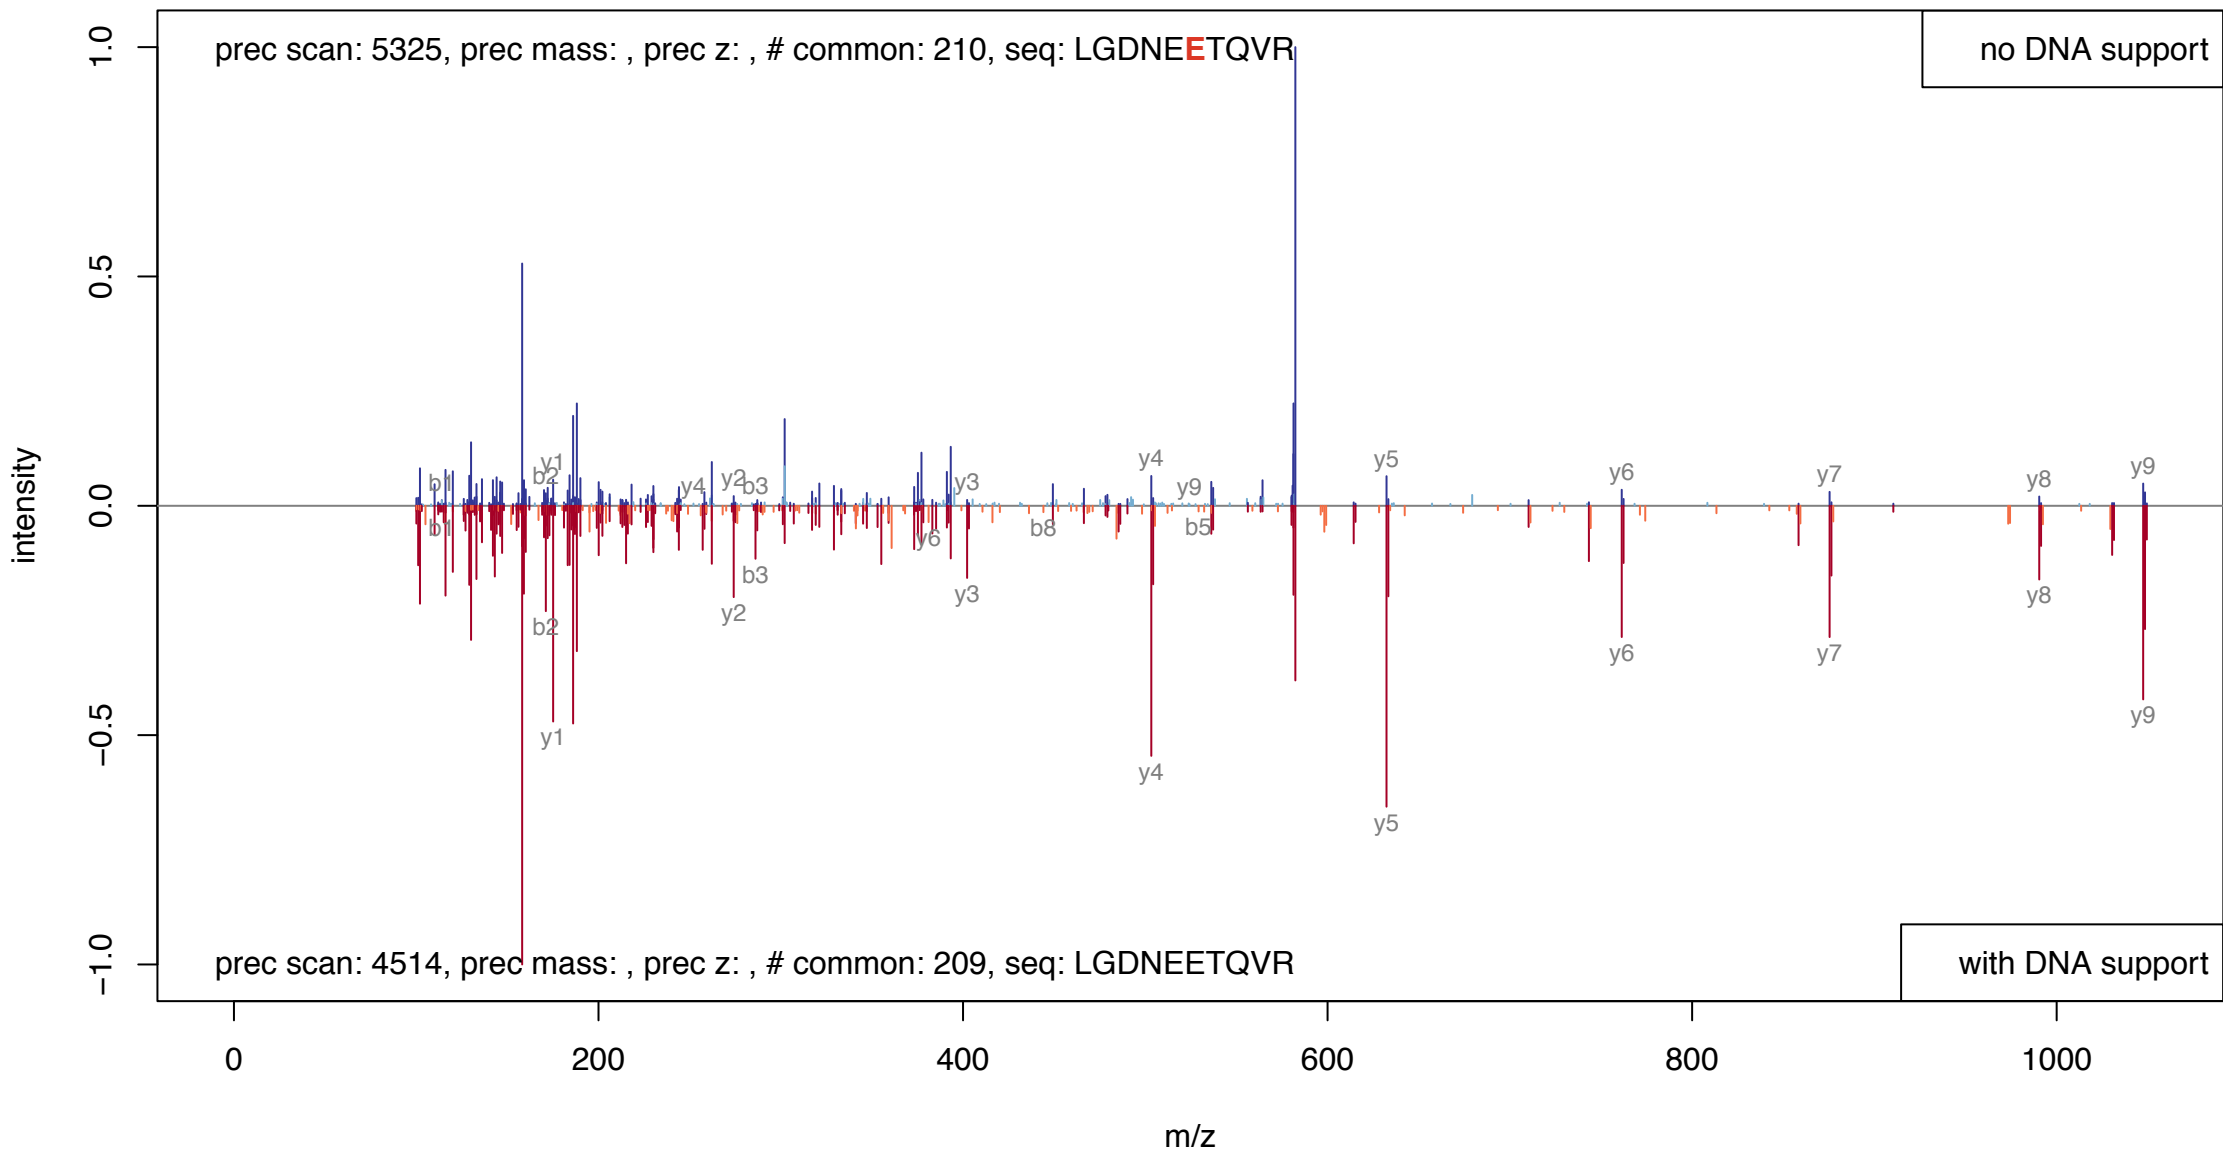

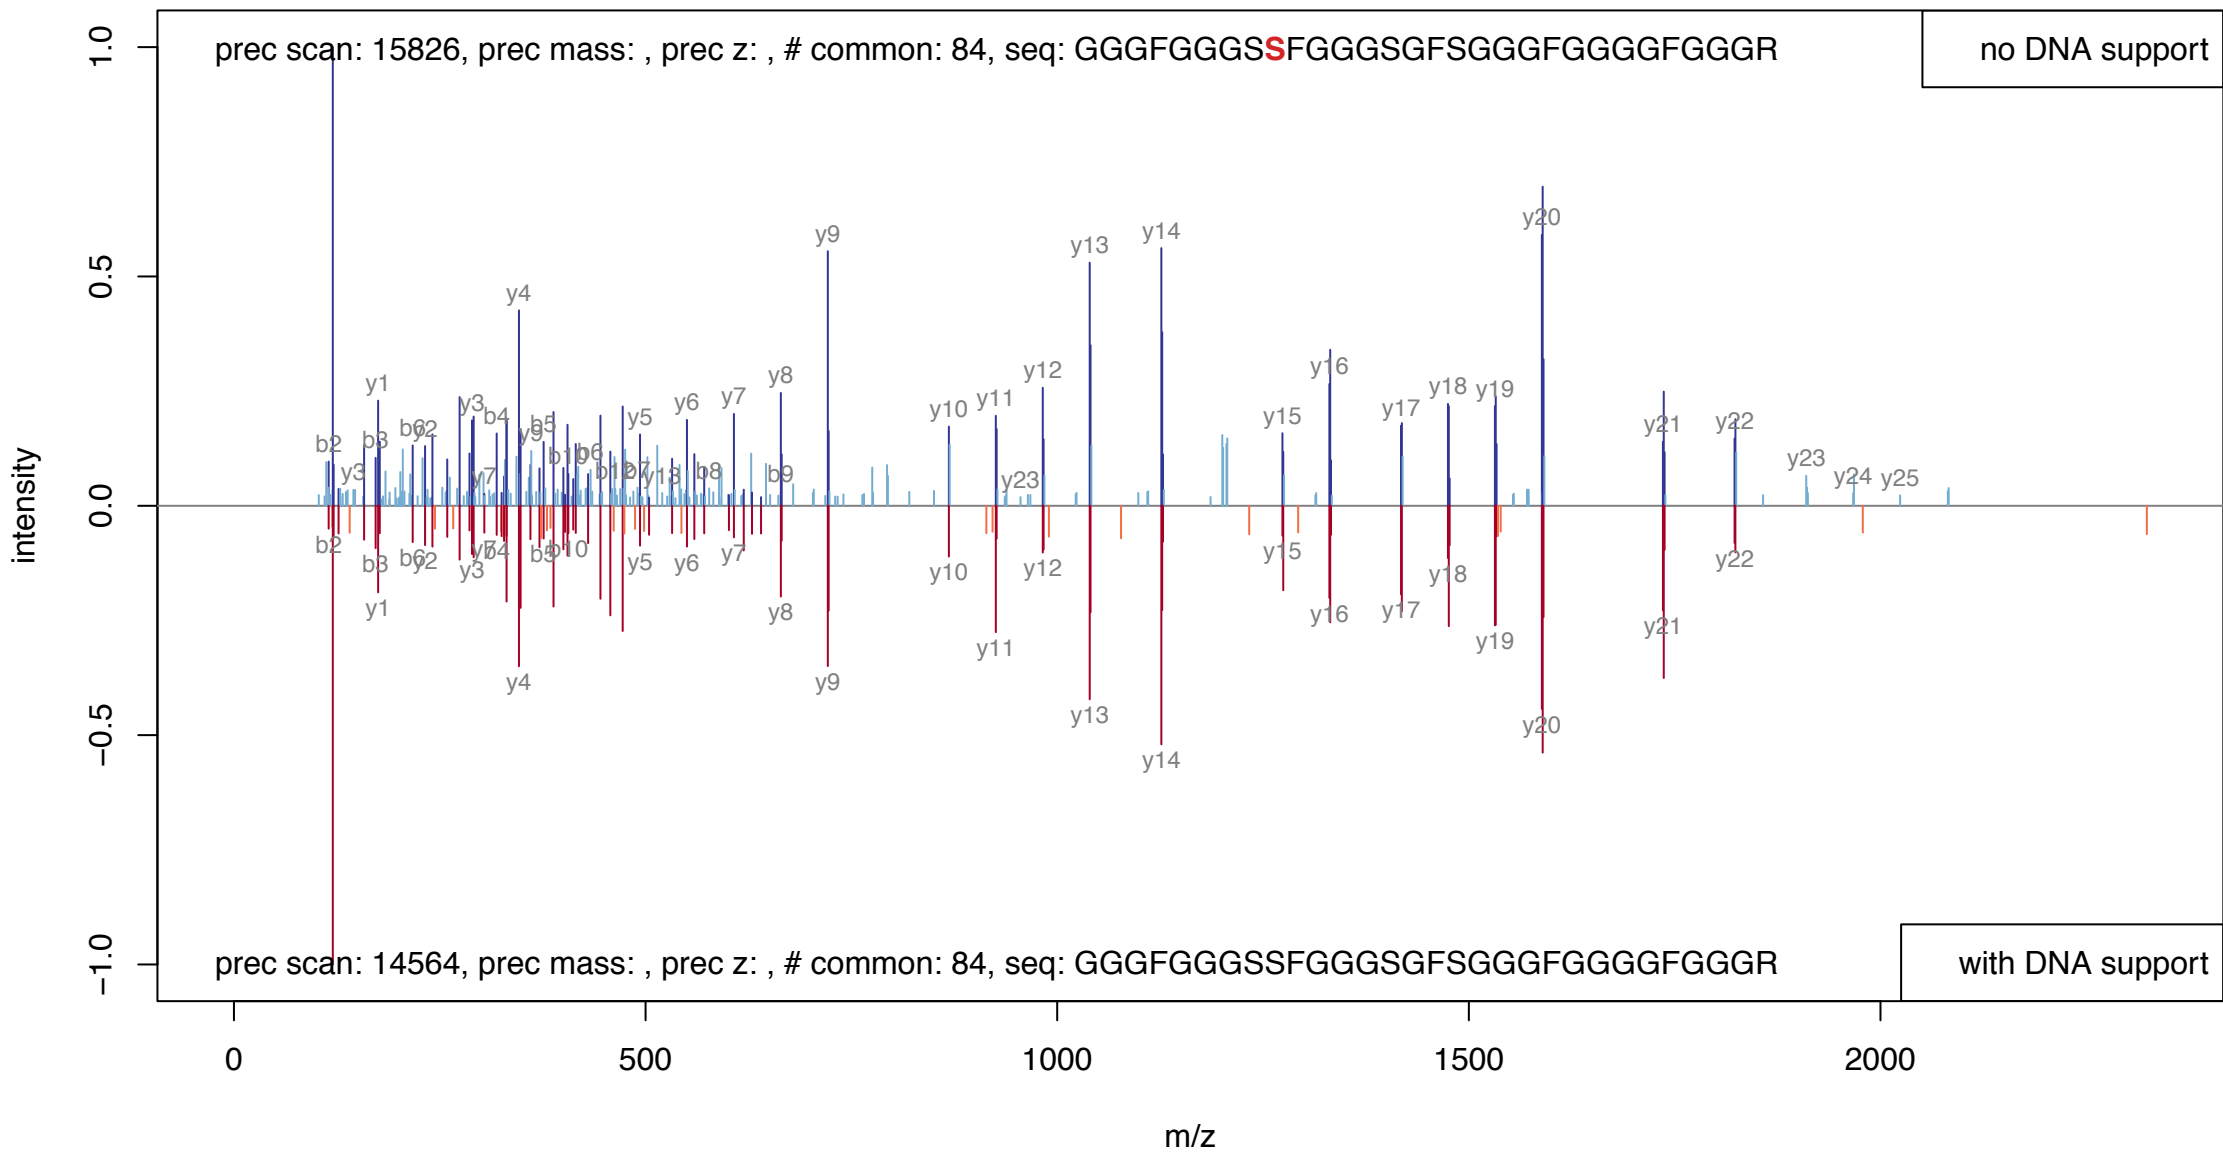

Incorrect match

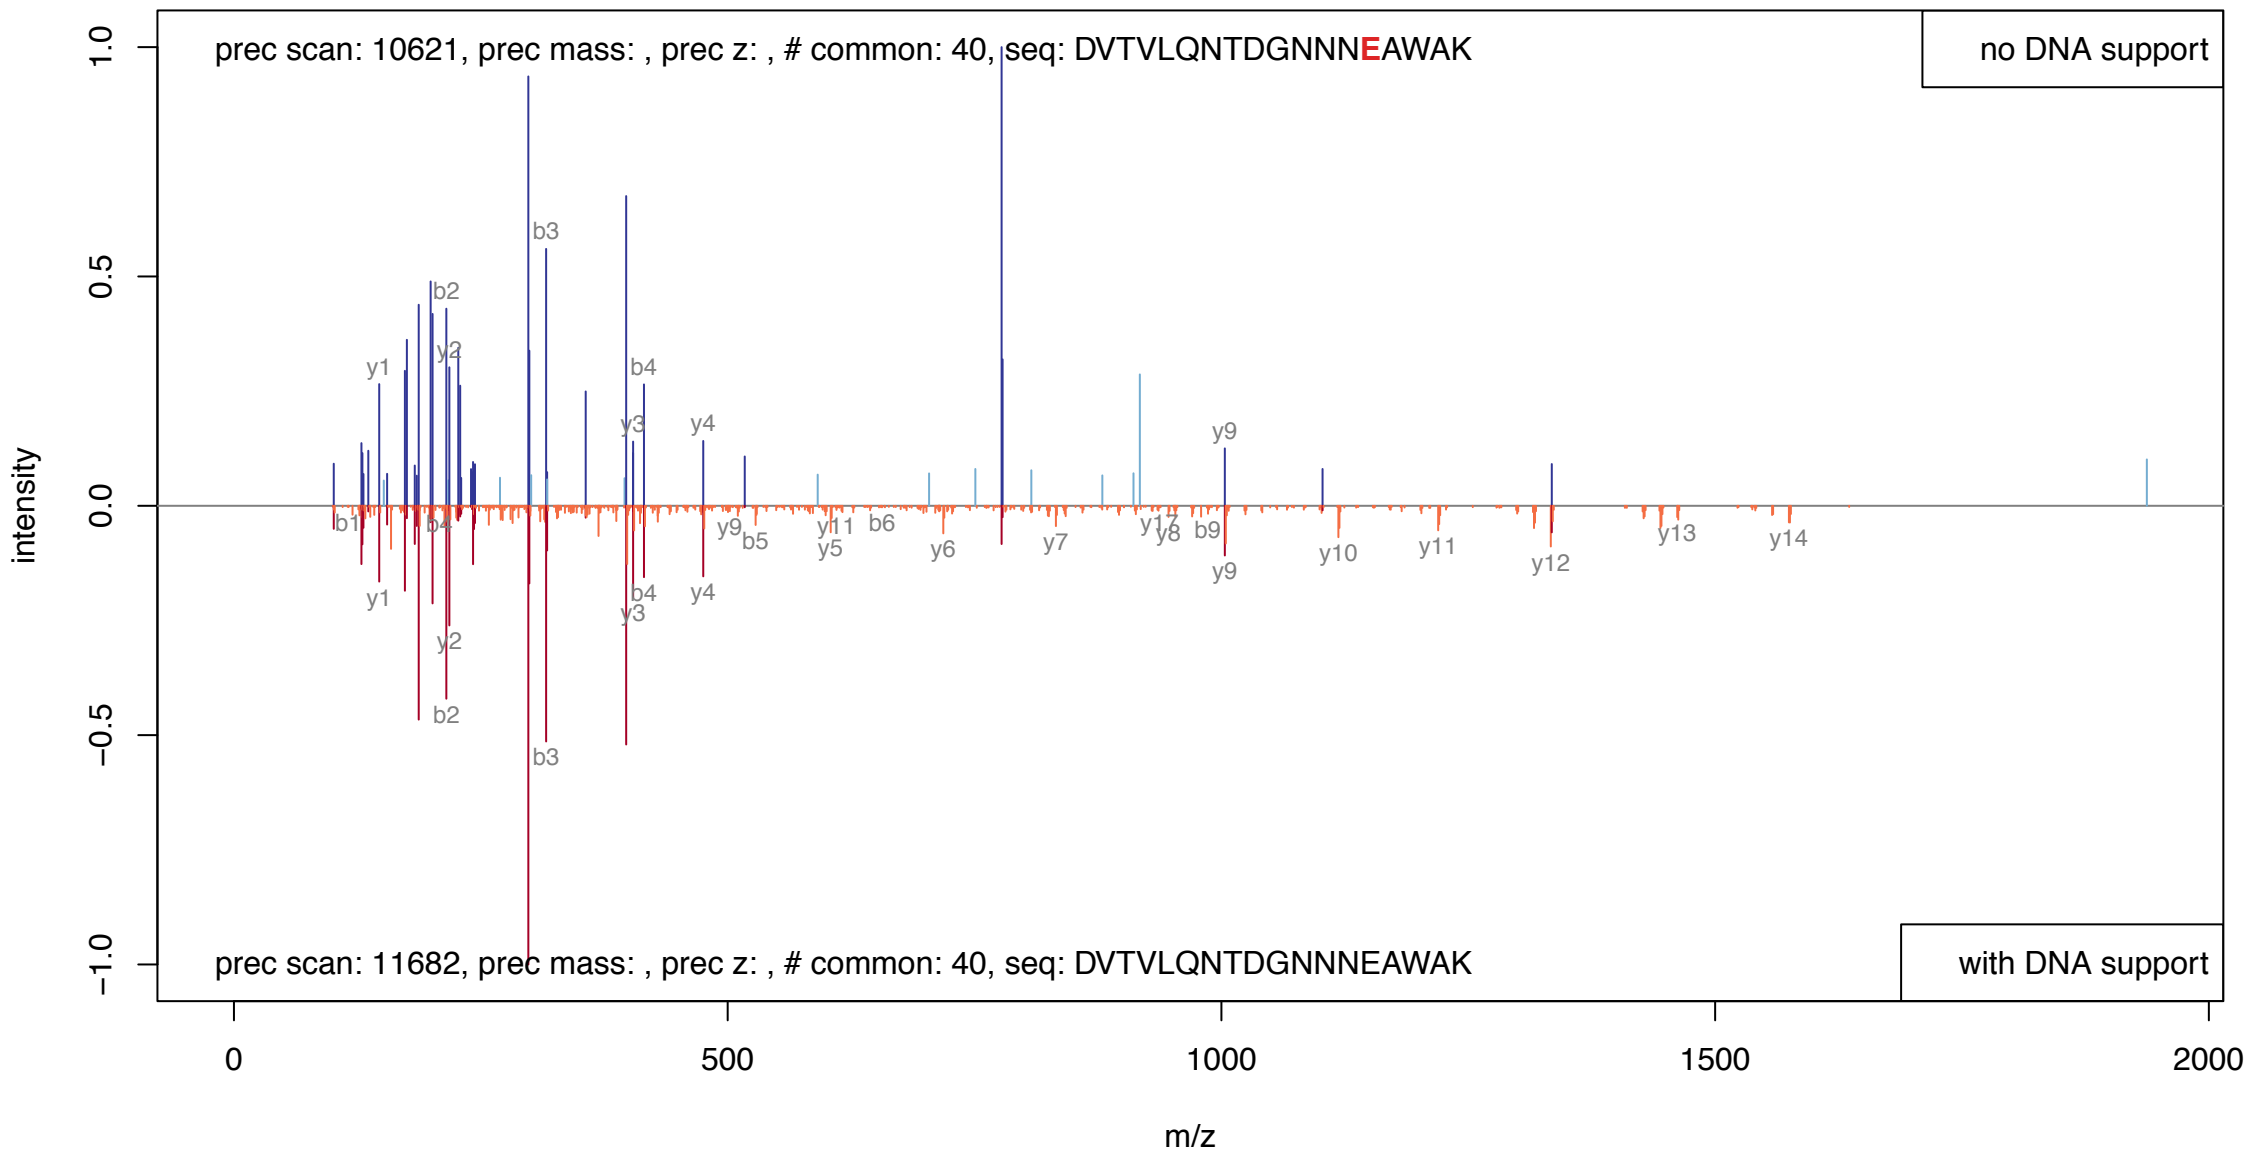

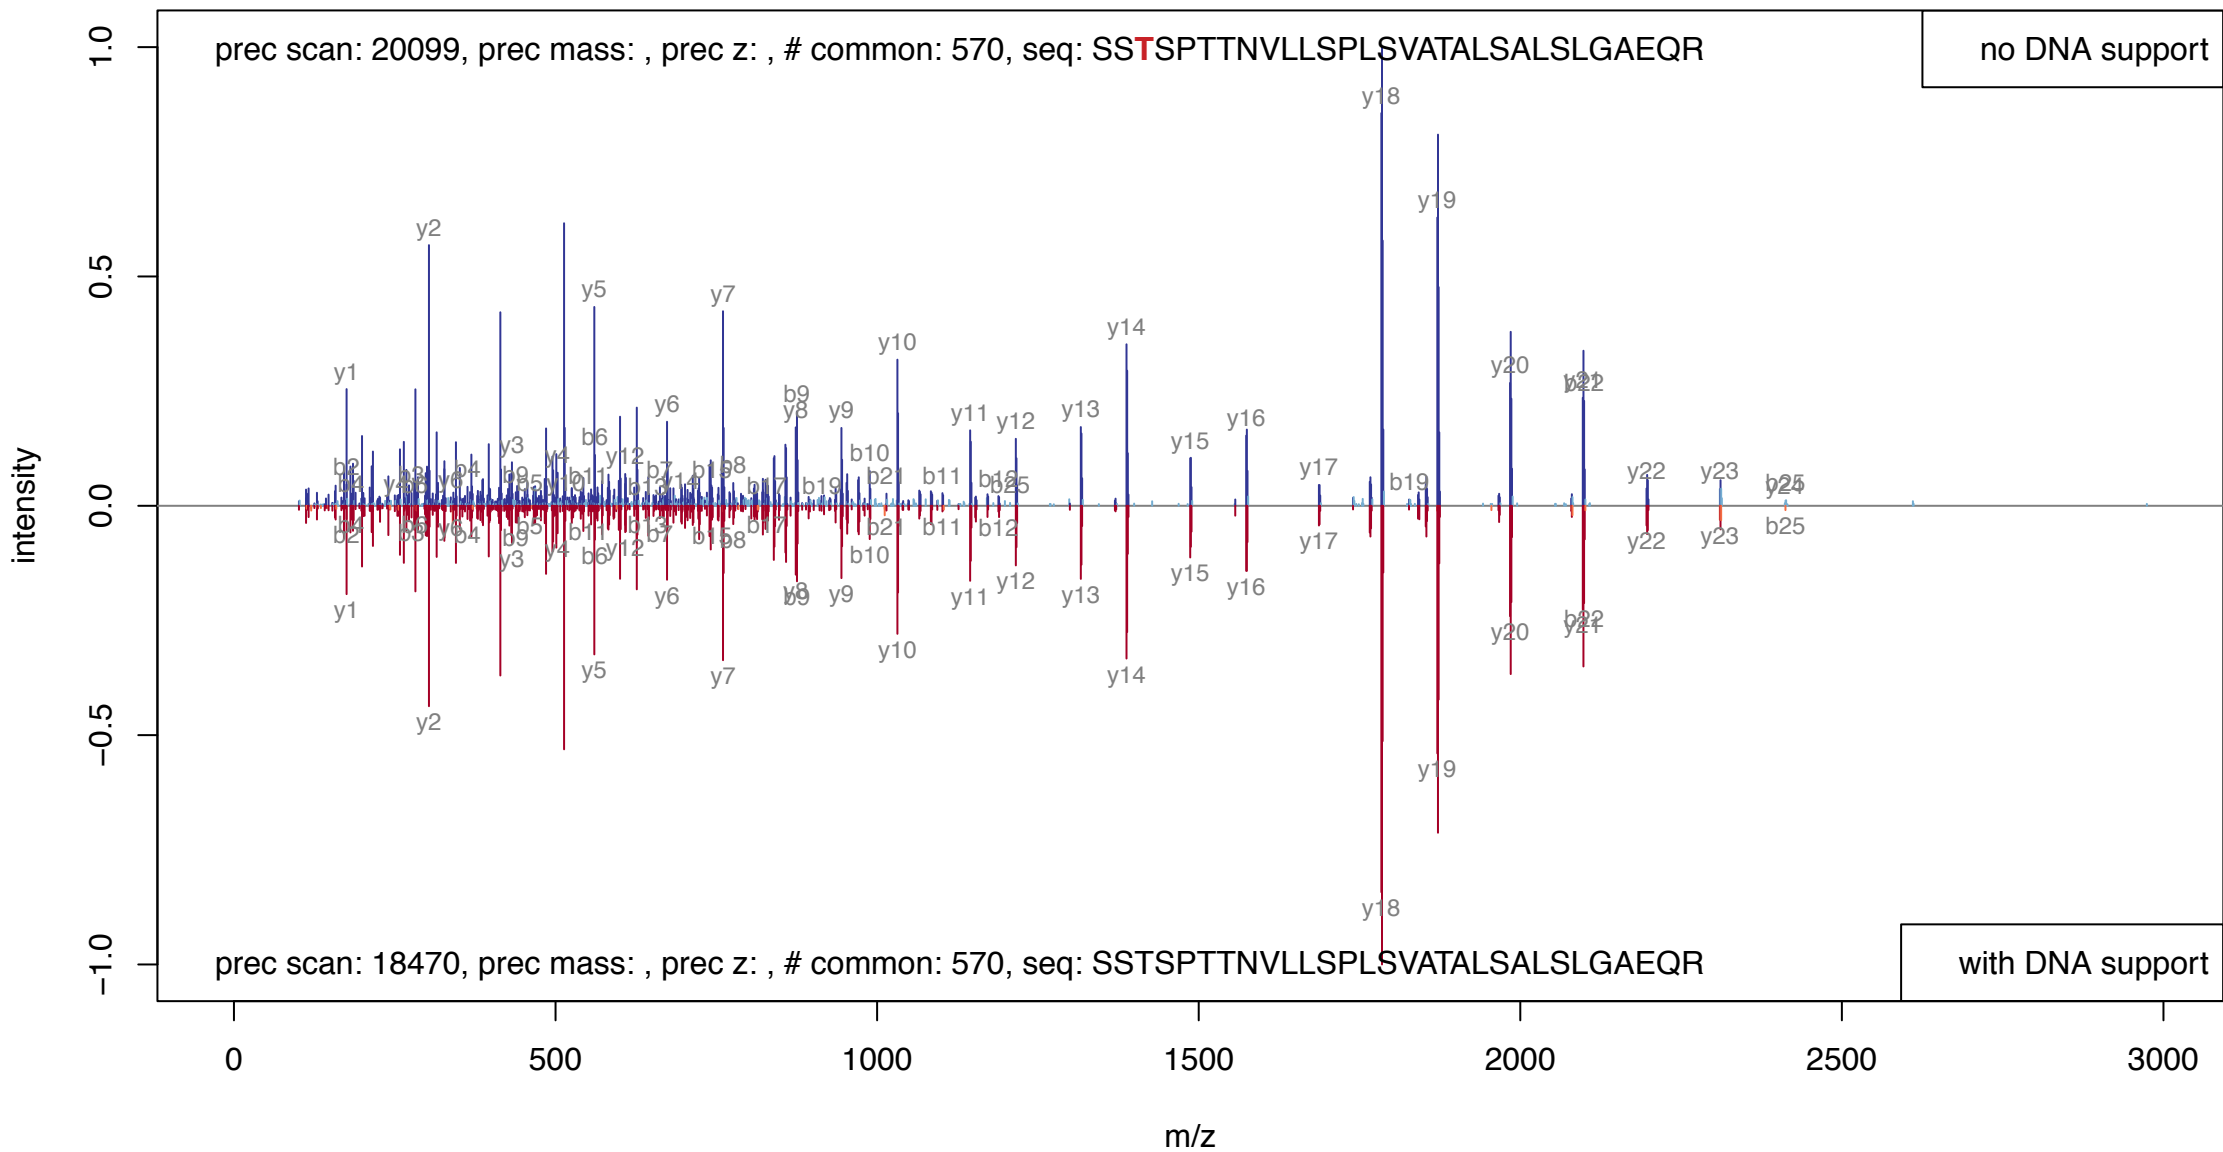



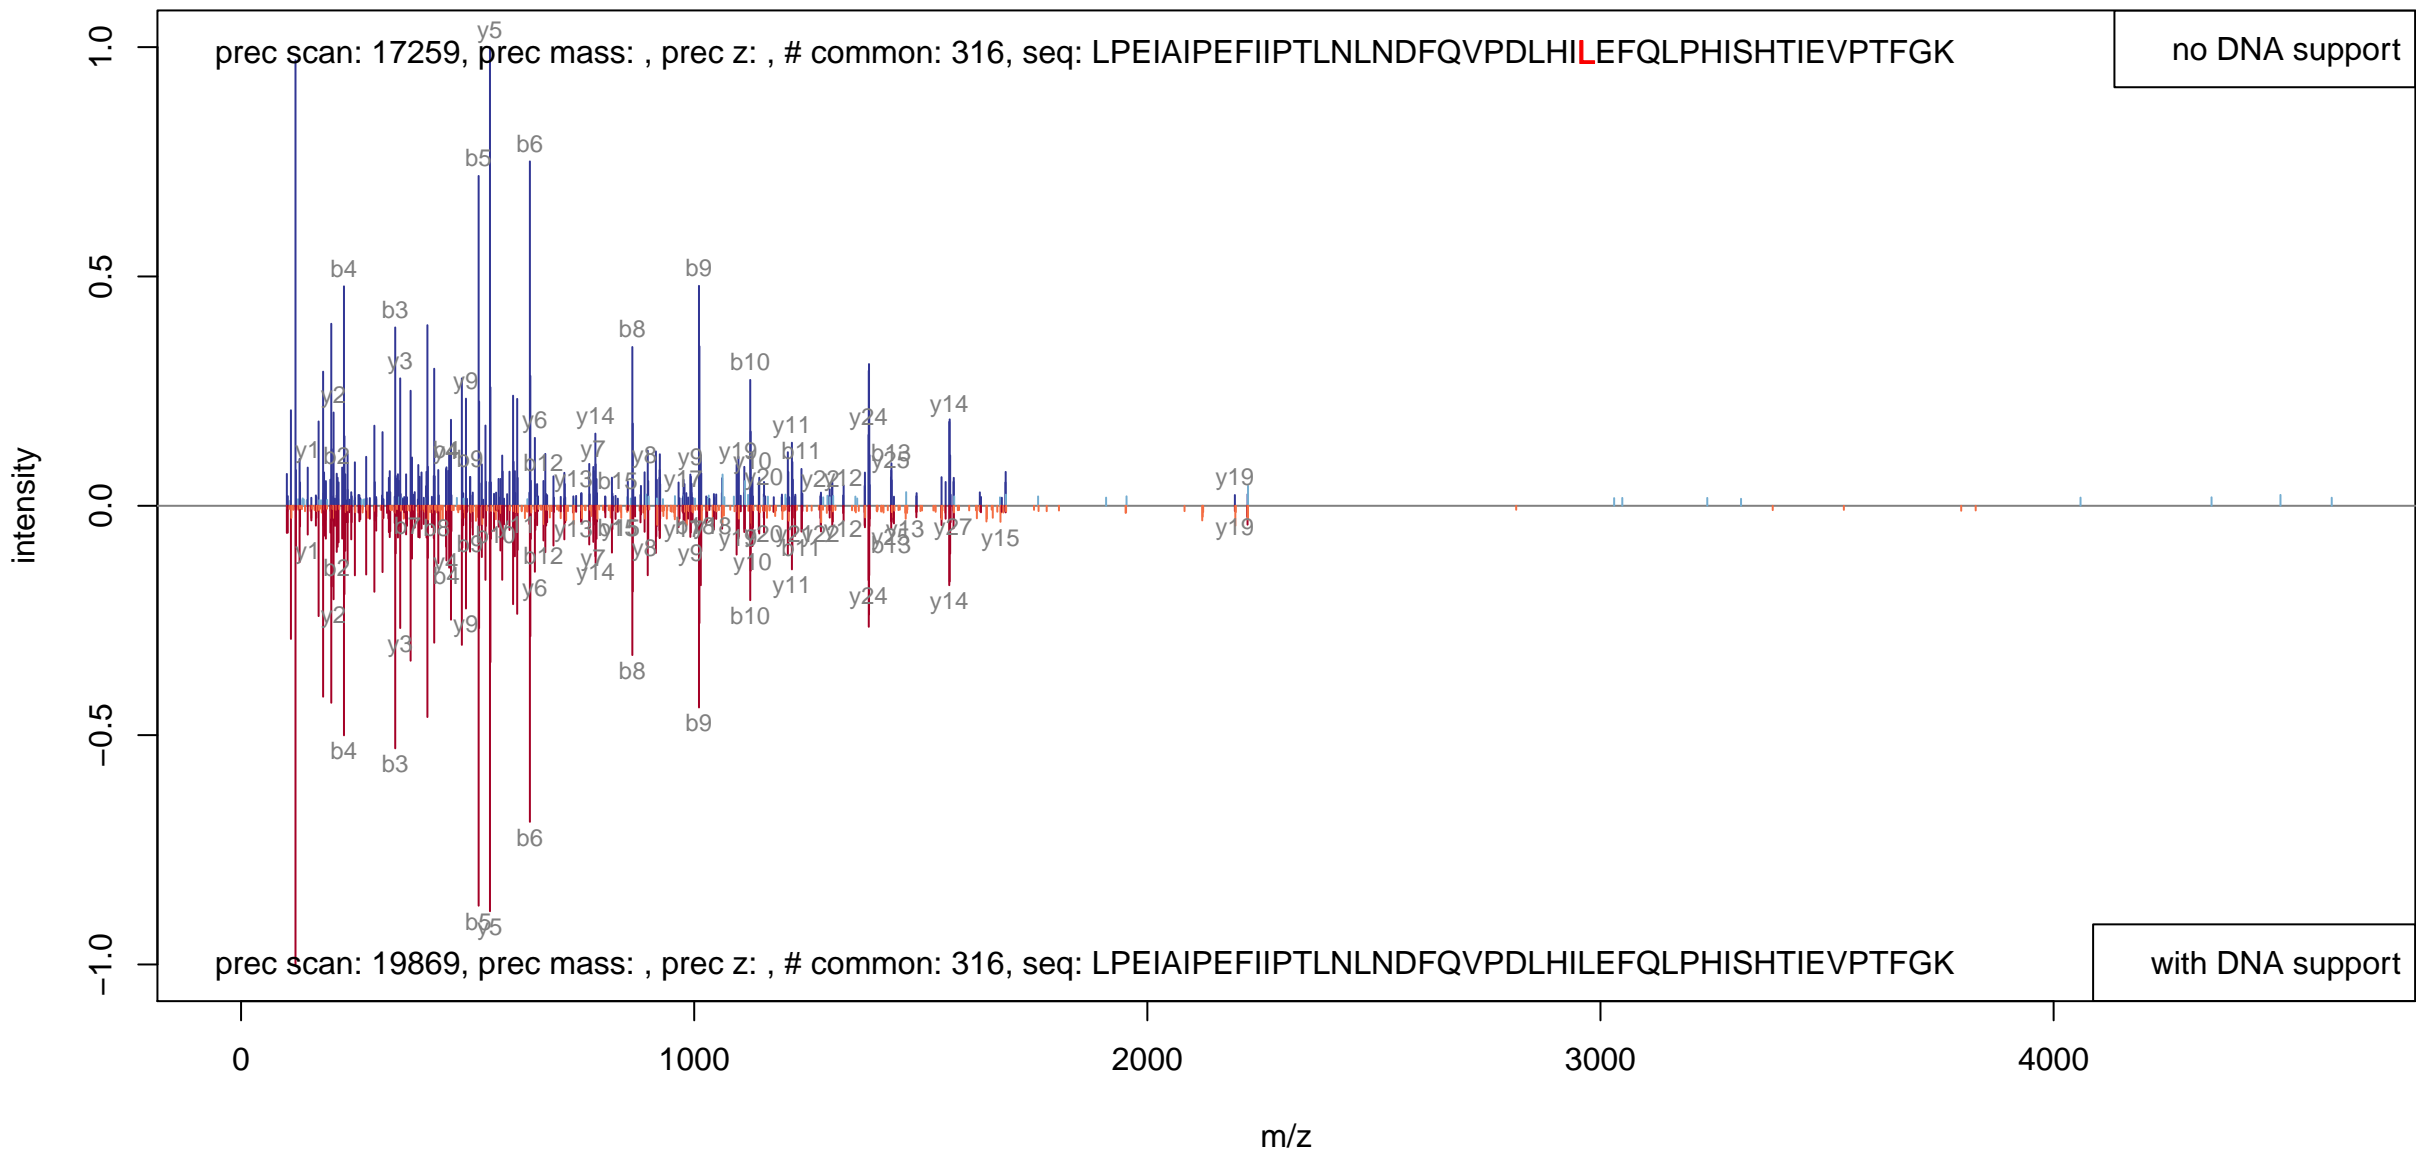

Incorrect match

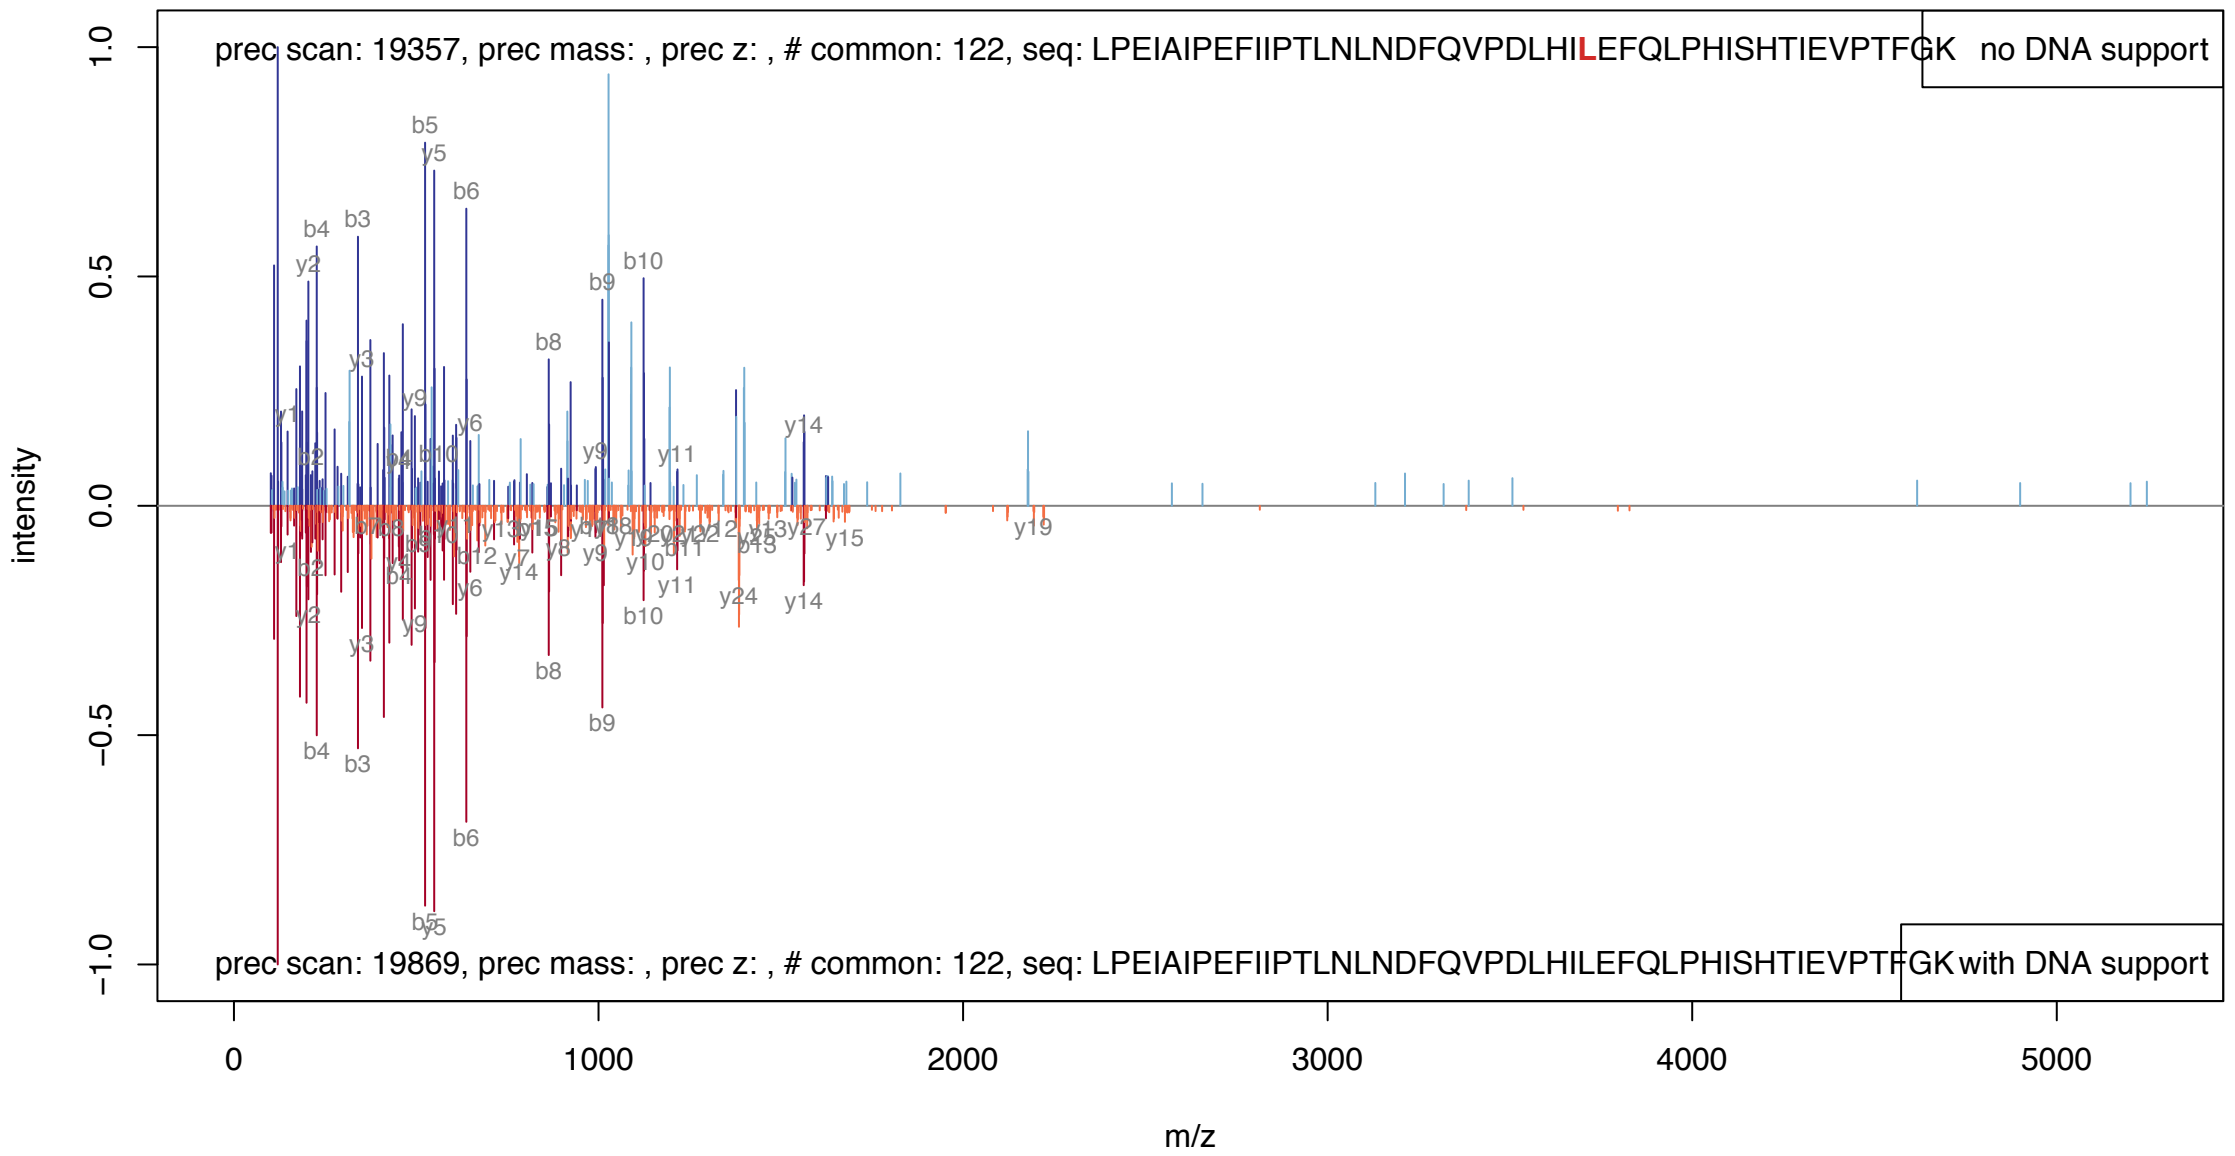

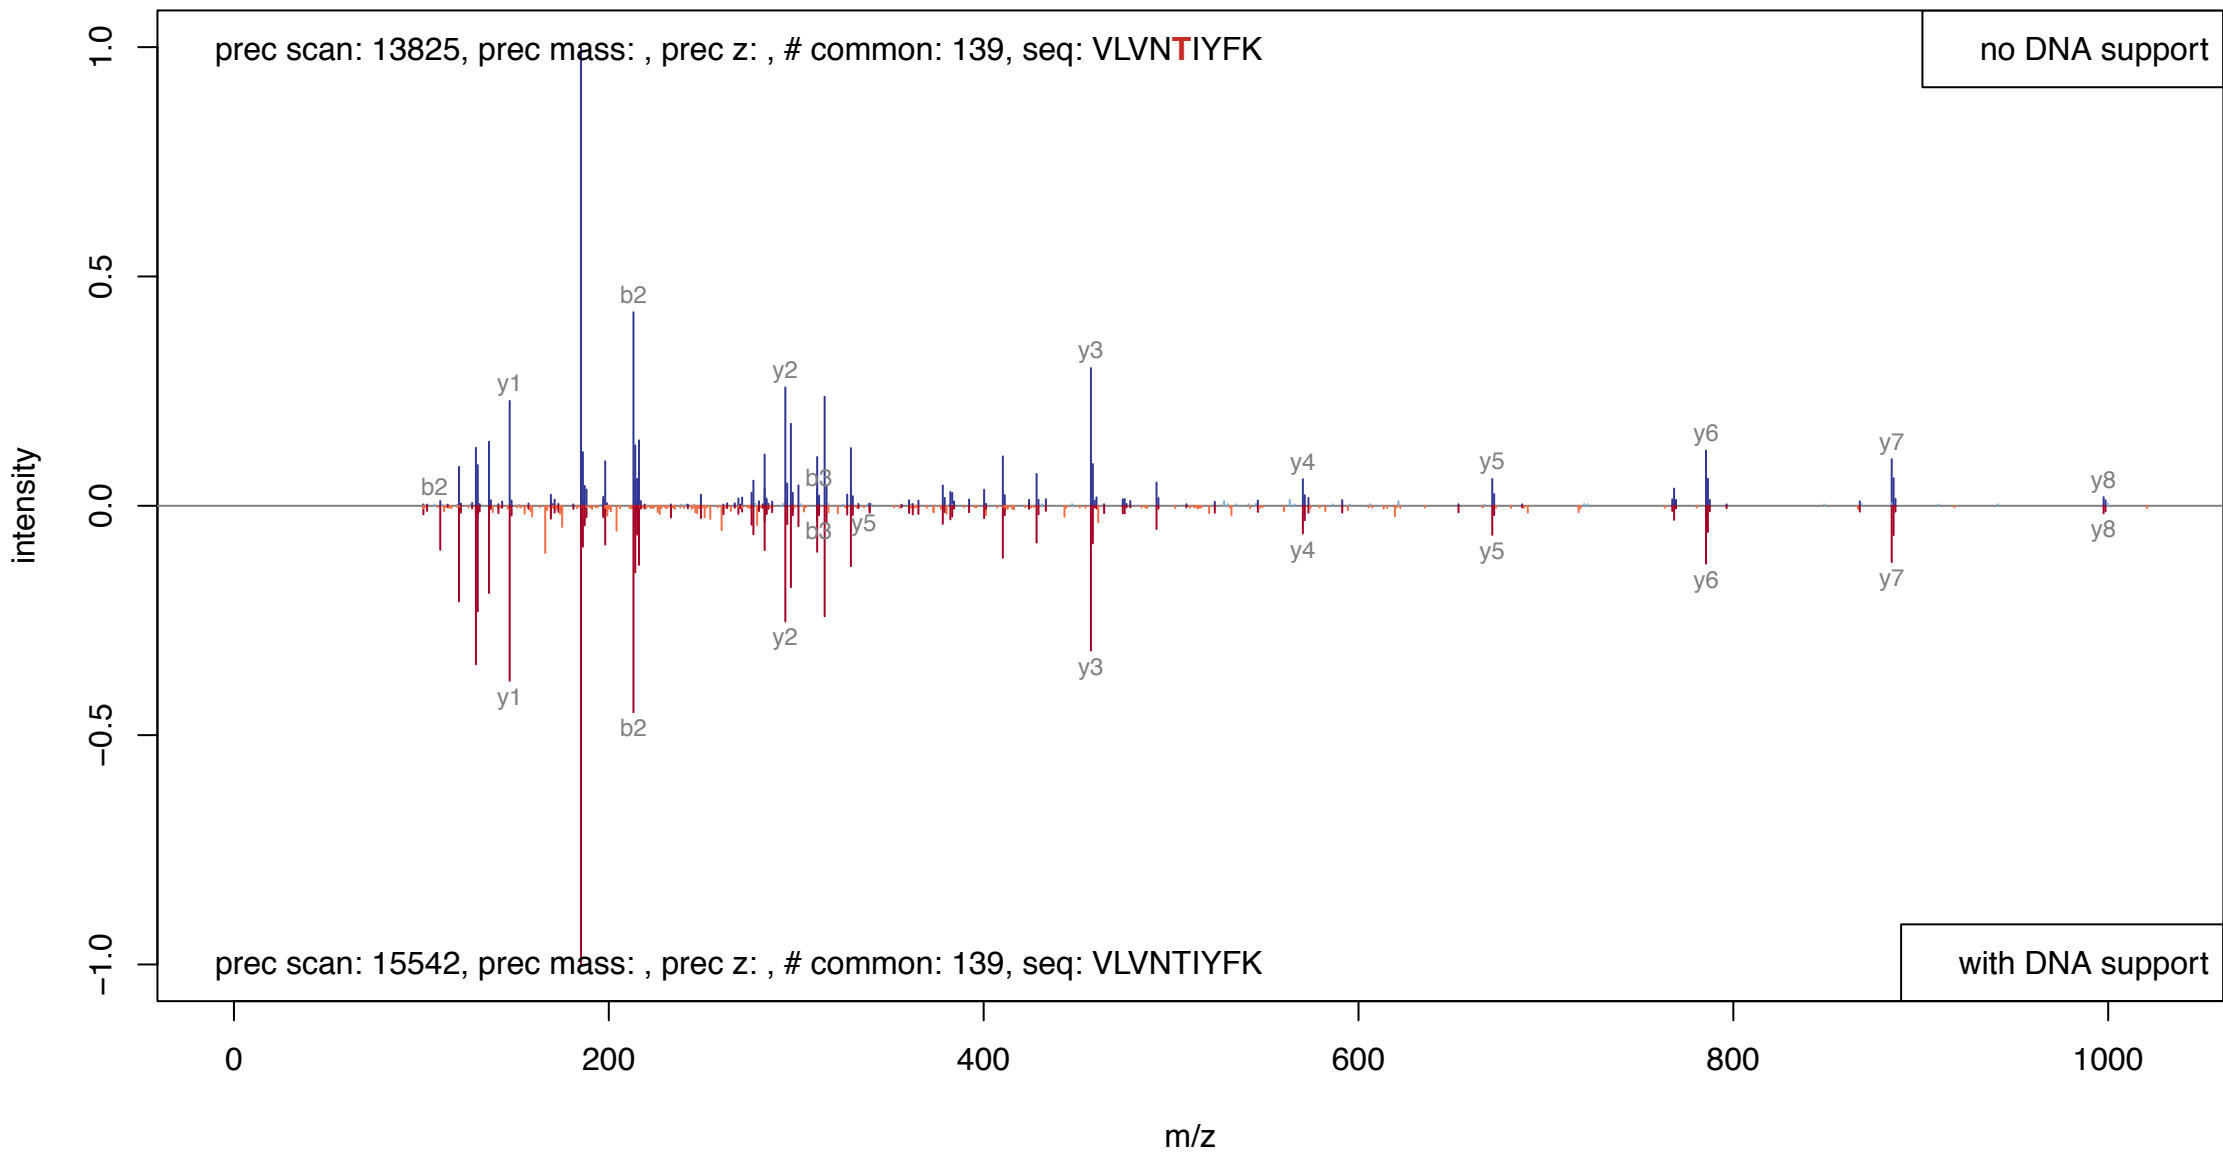

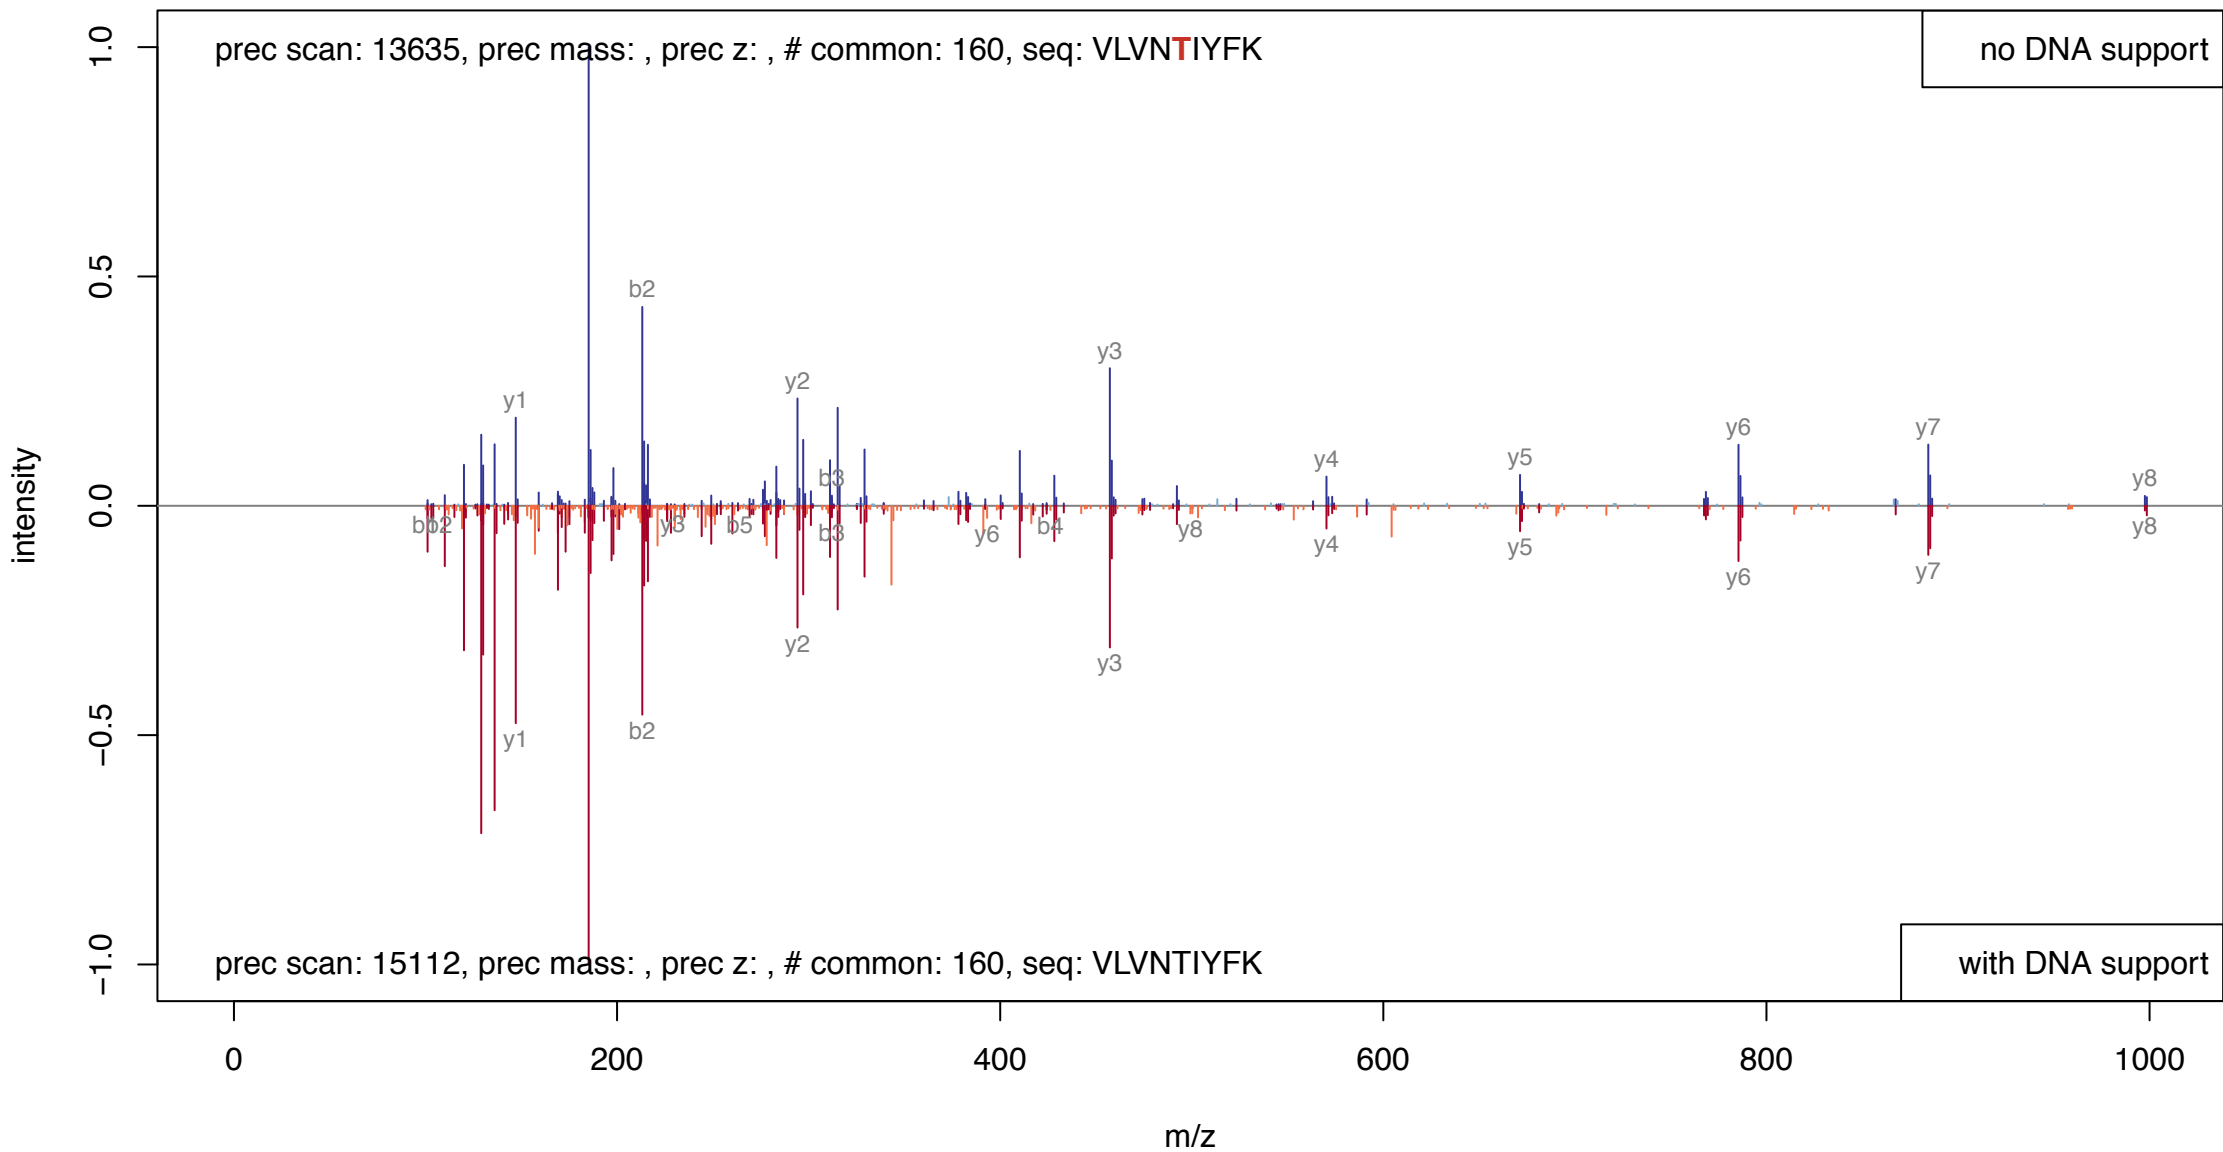

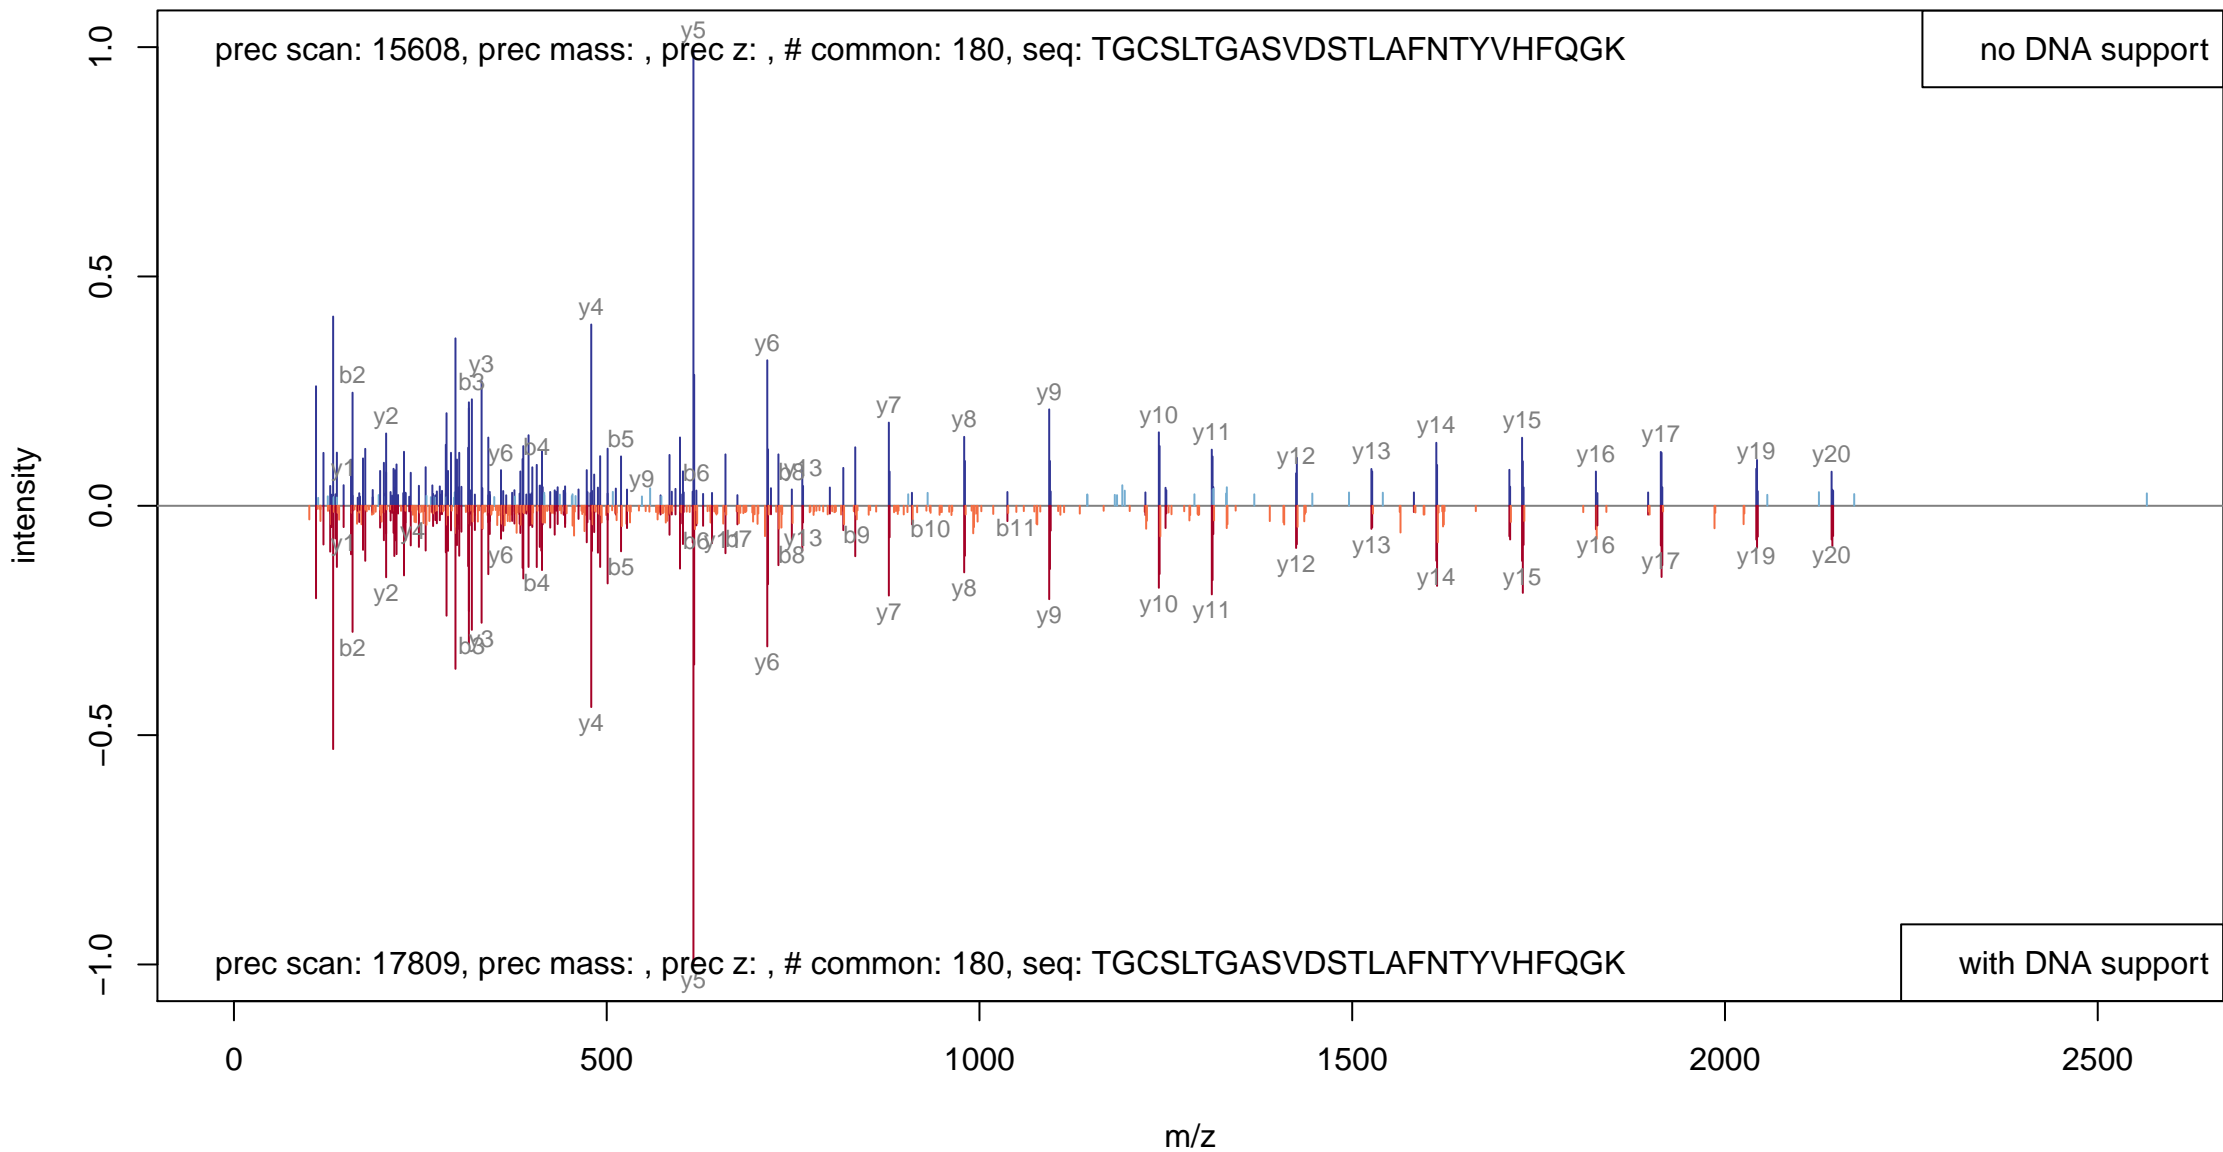

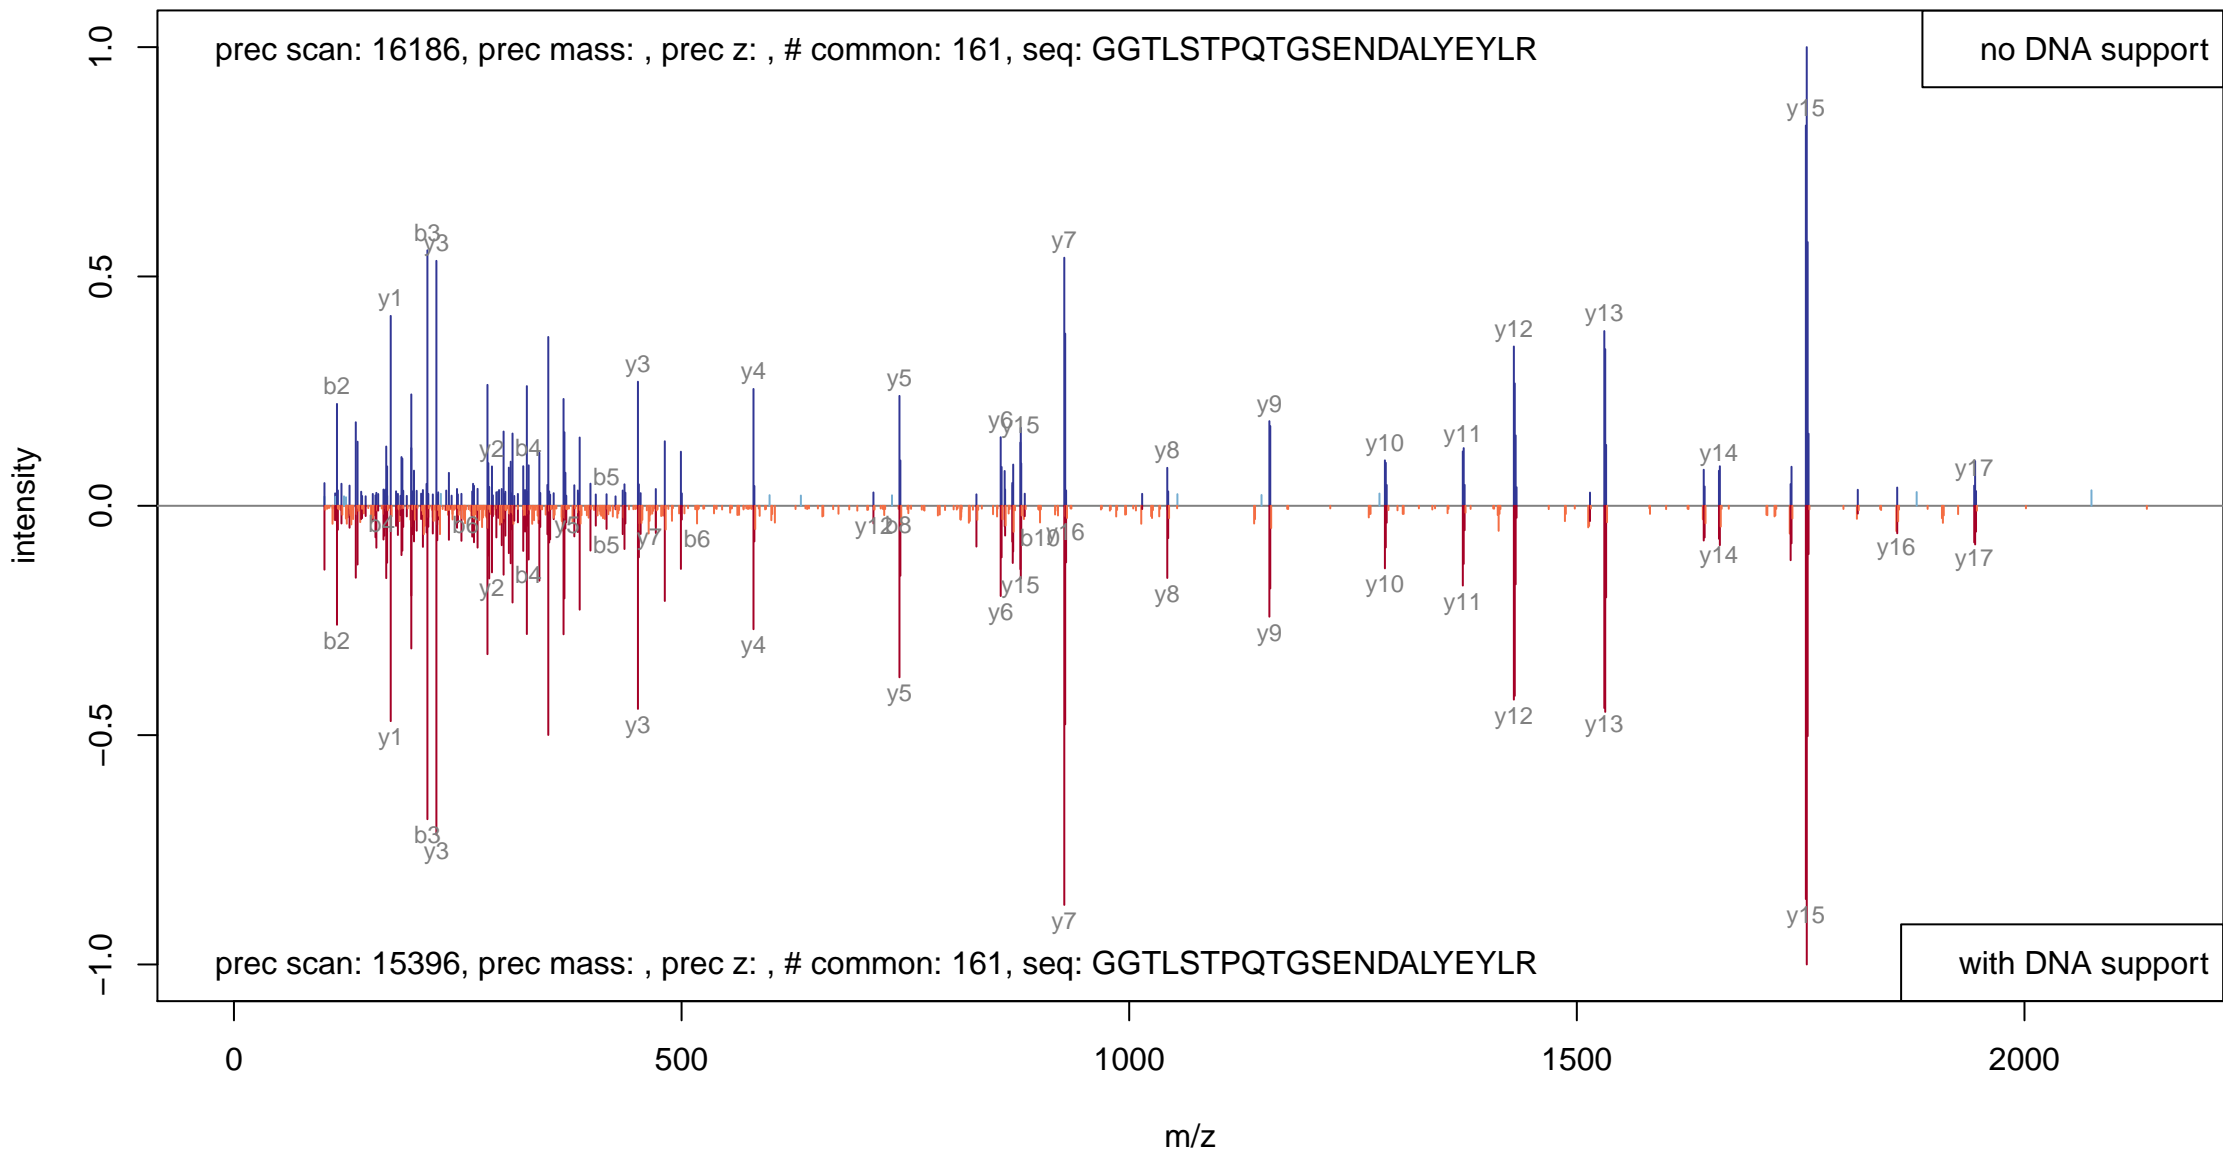

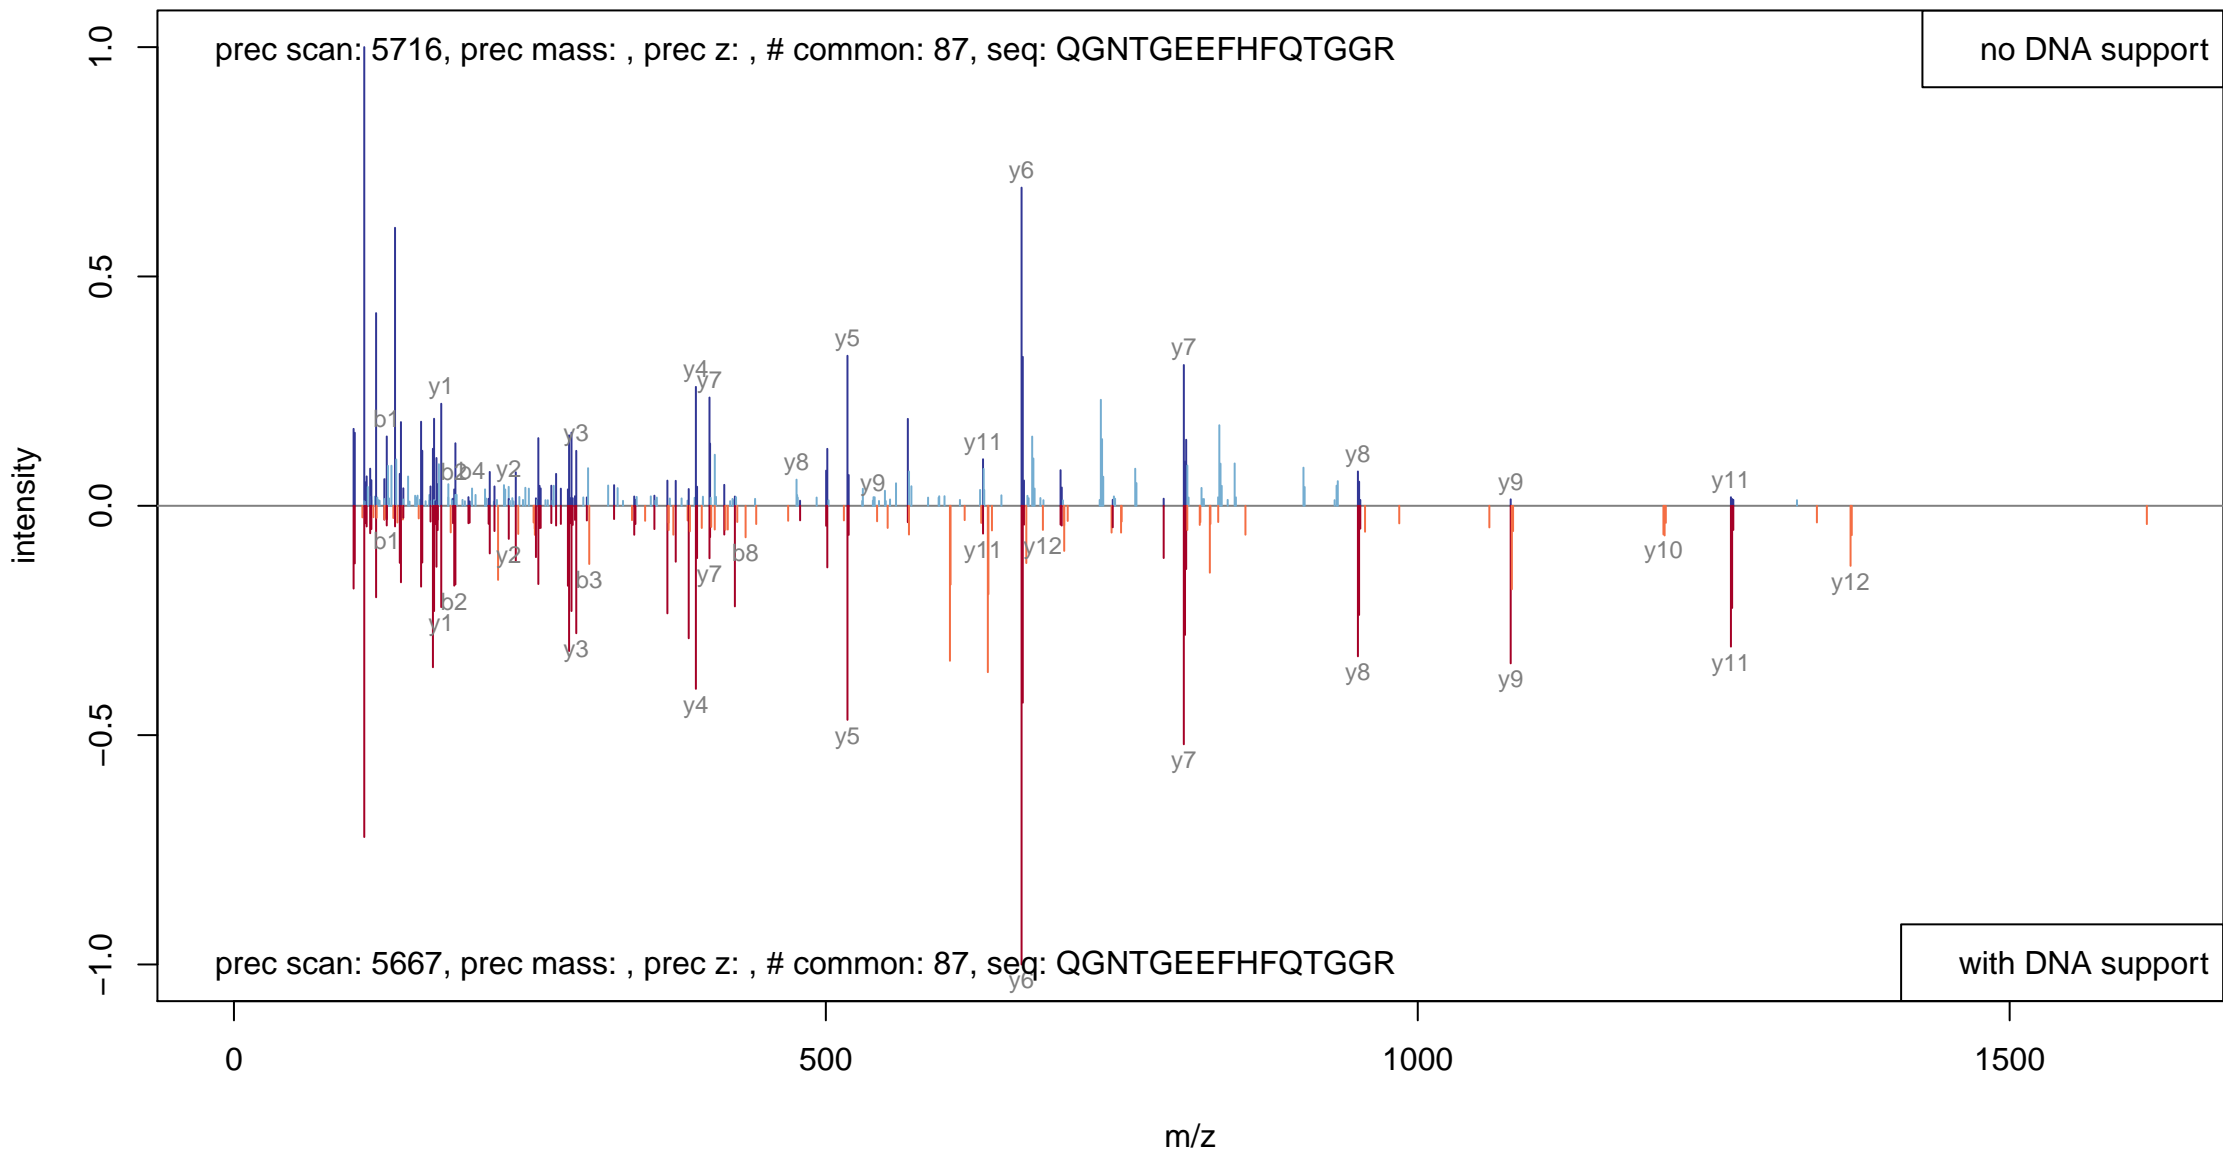

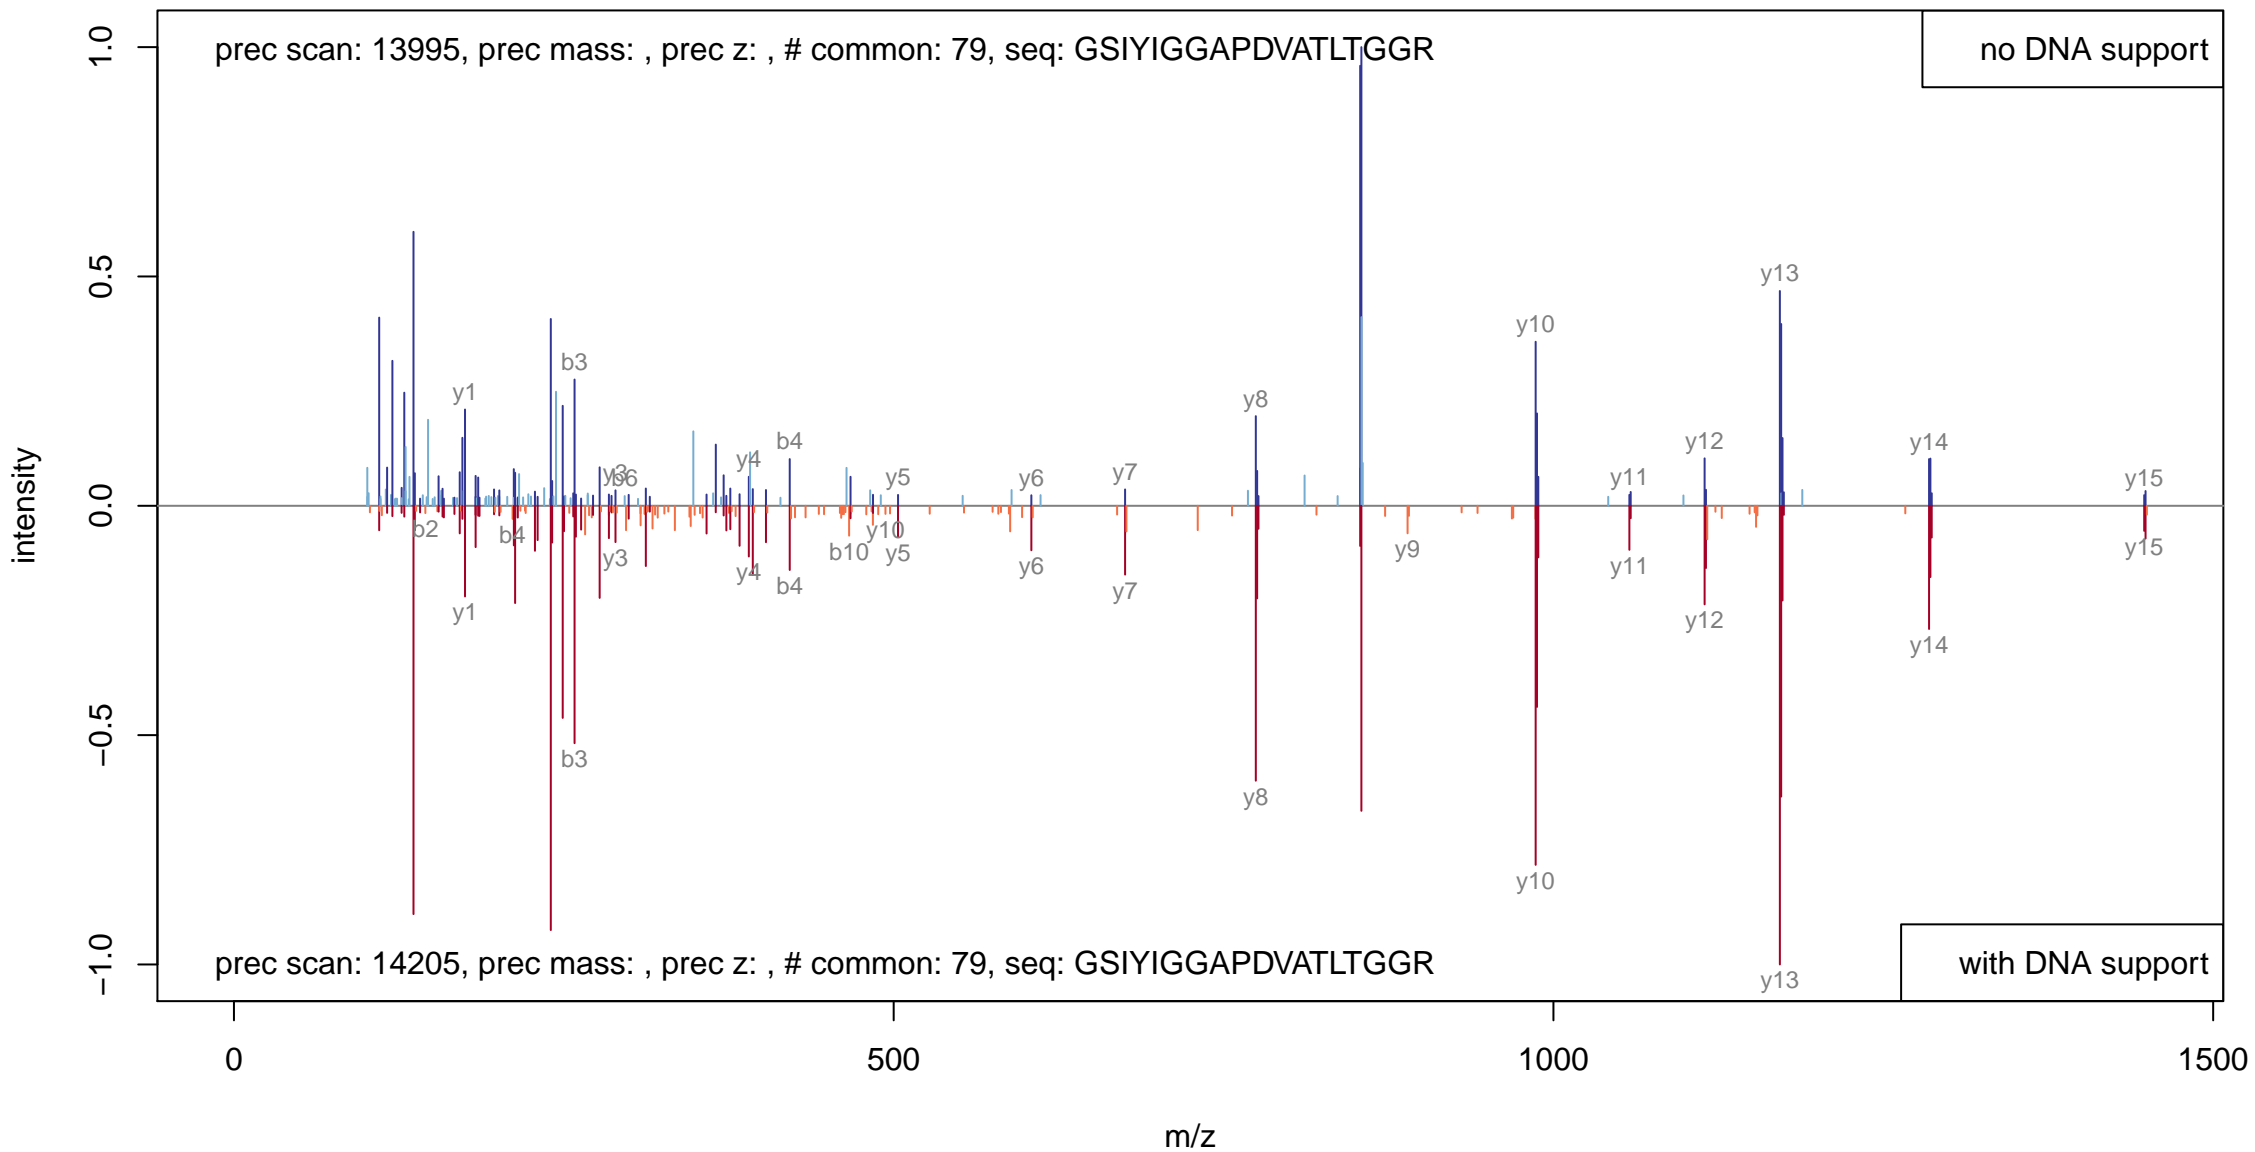



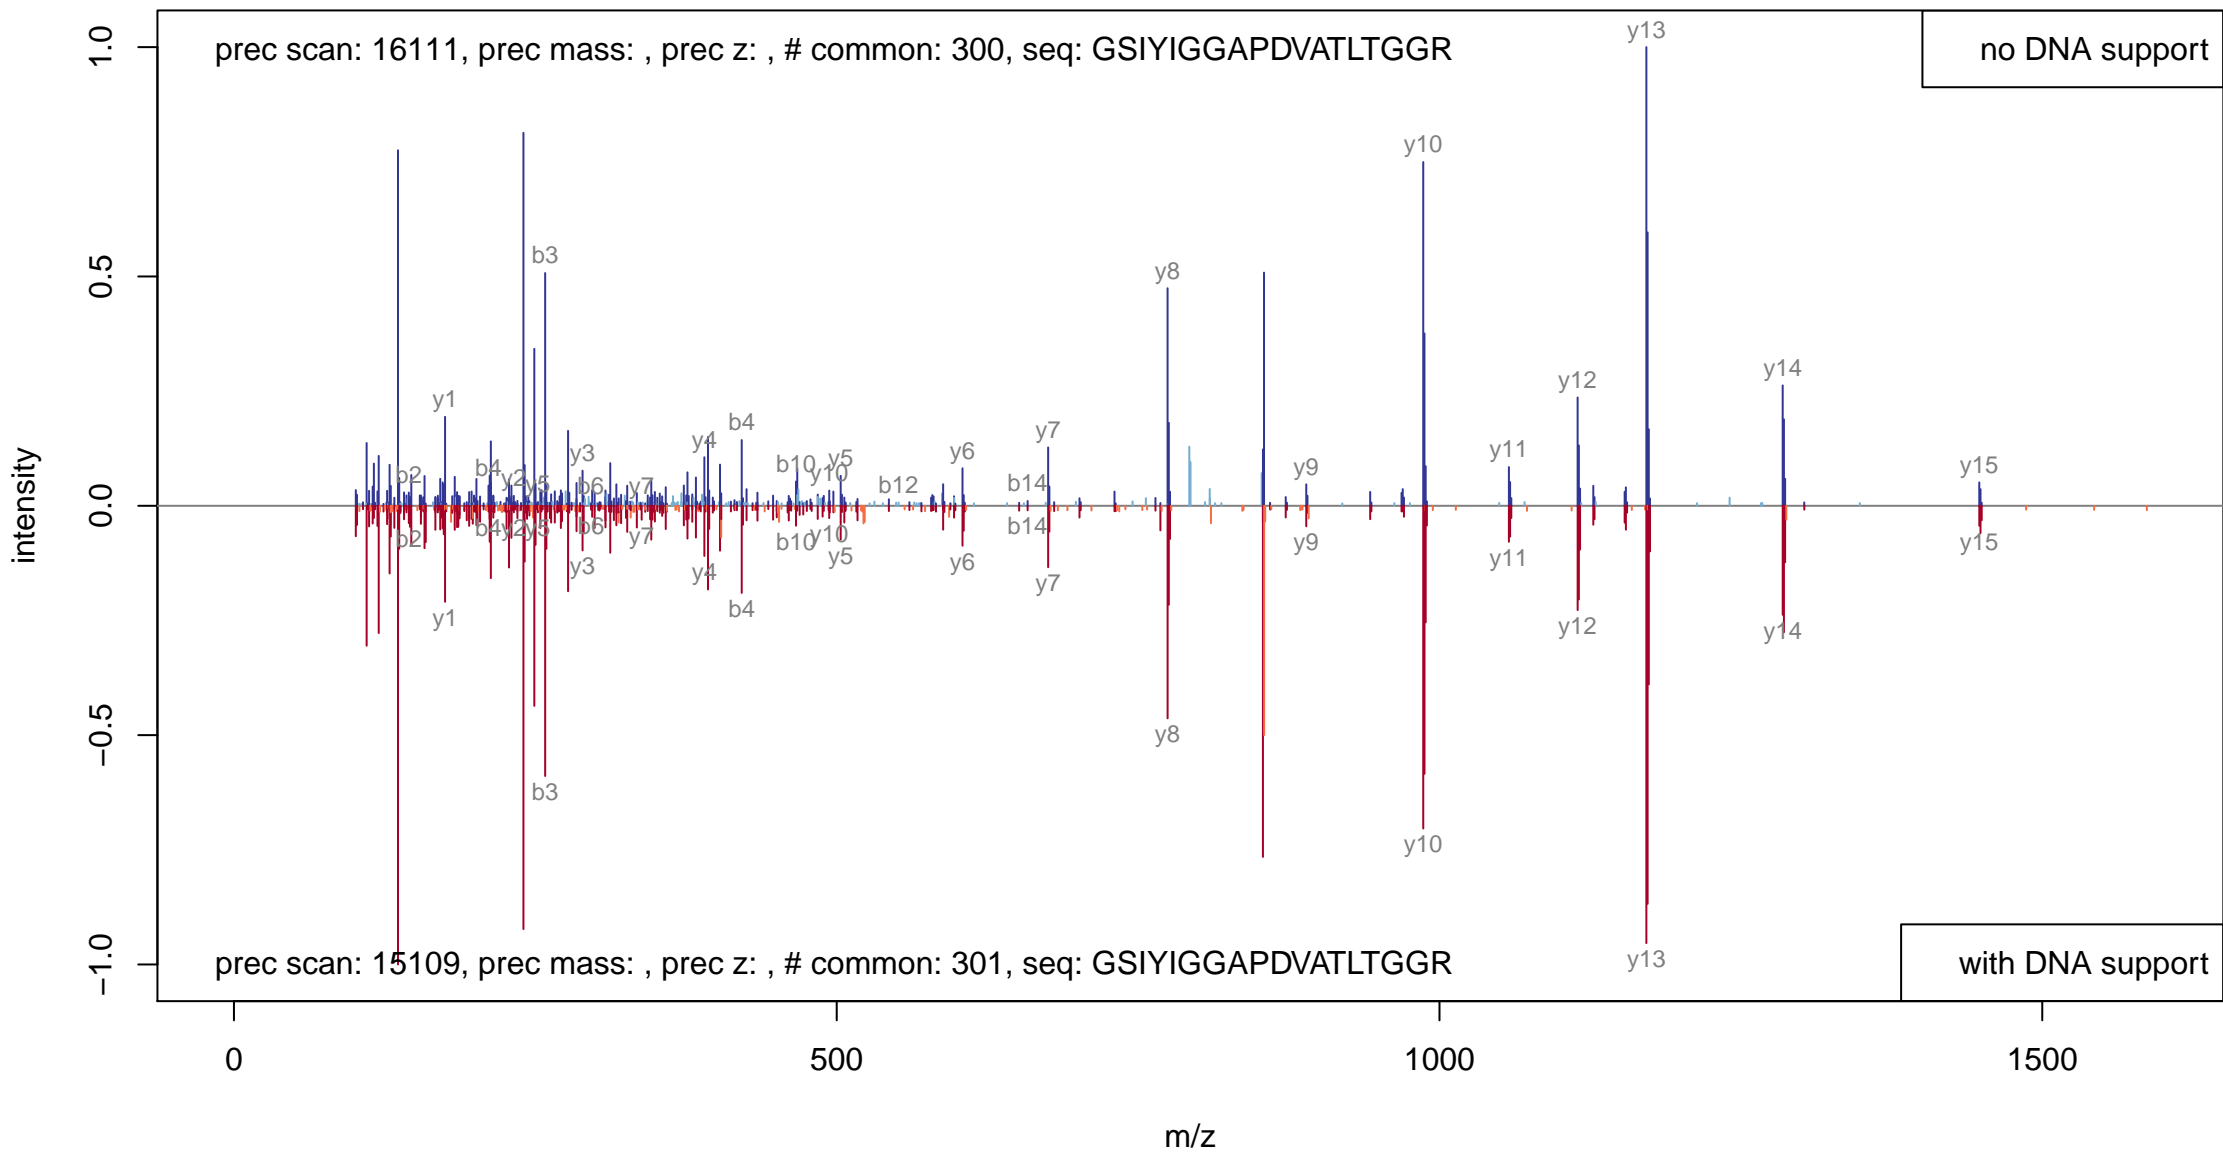

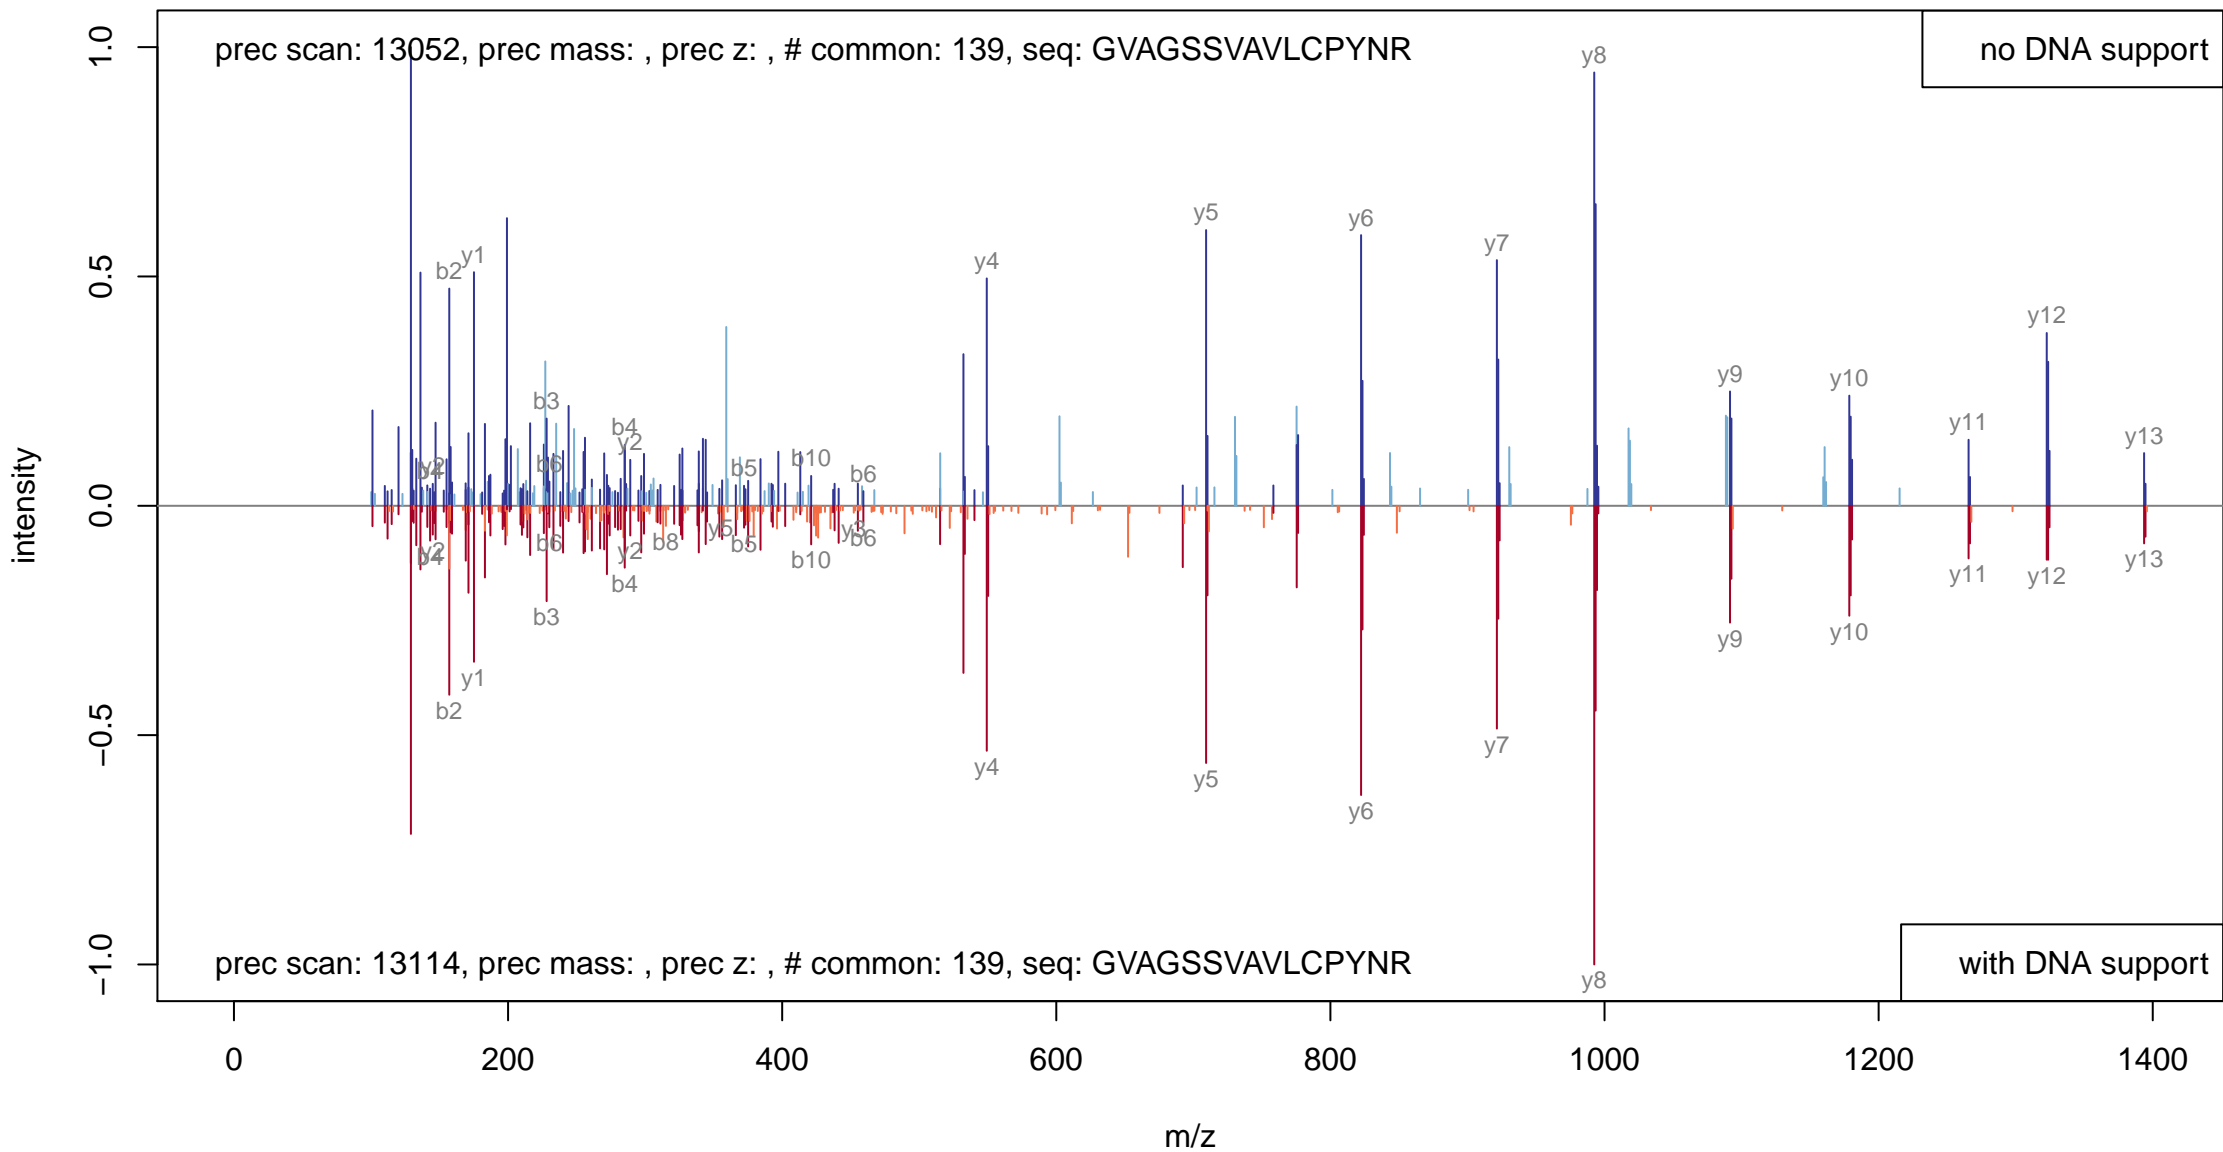

Incorrect match

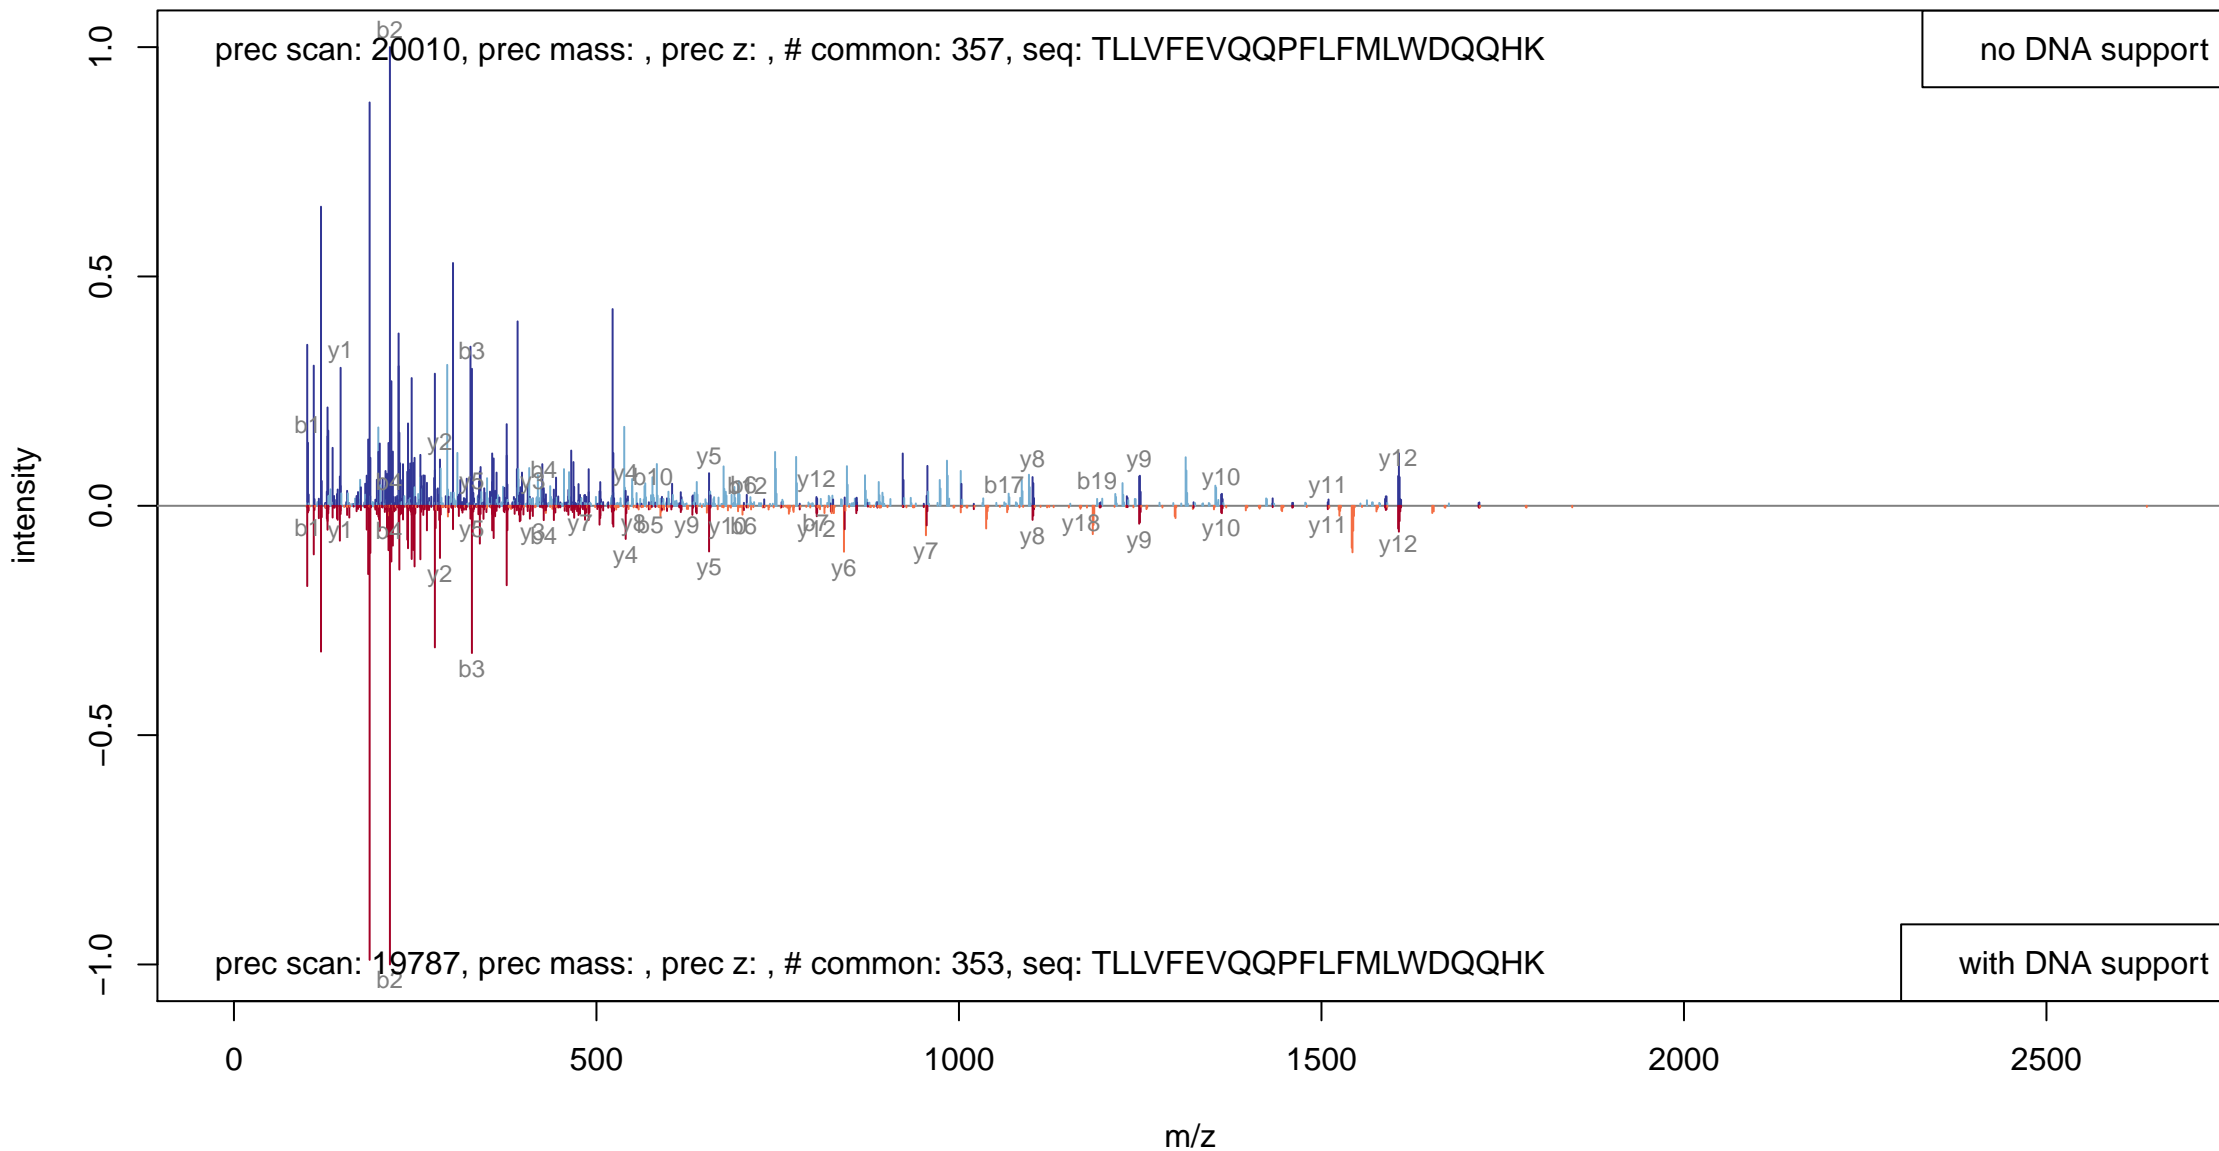

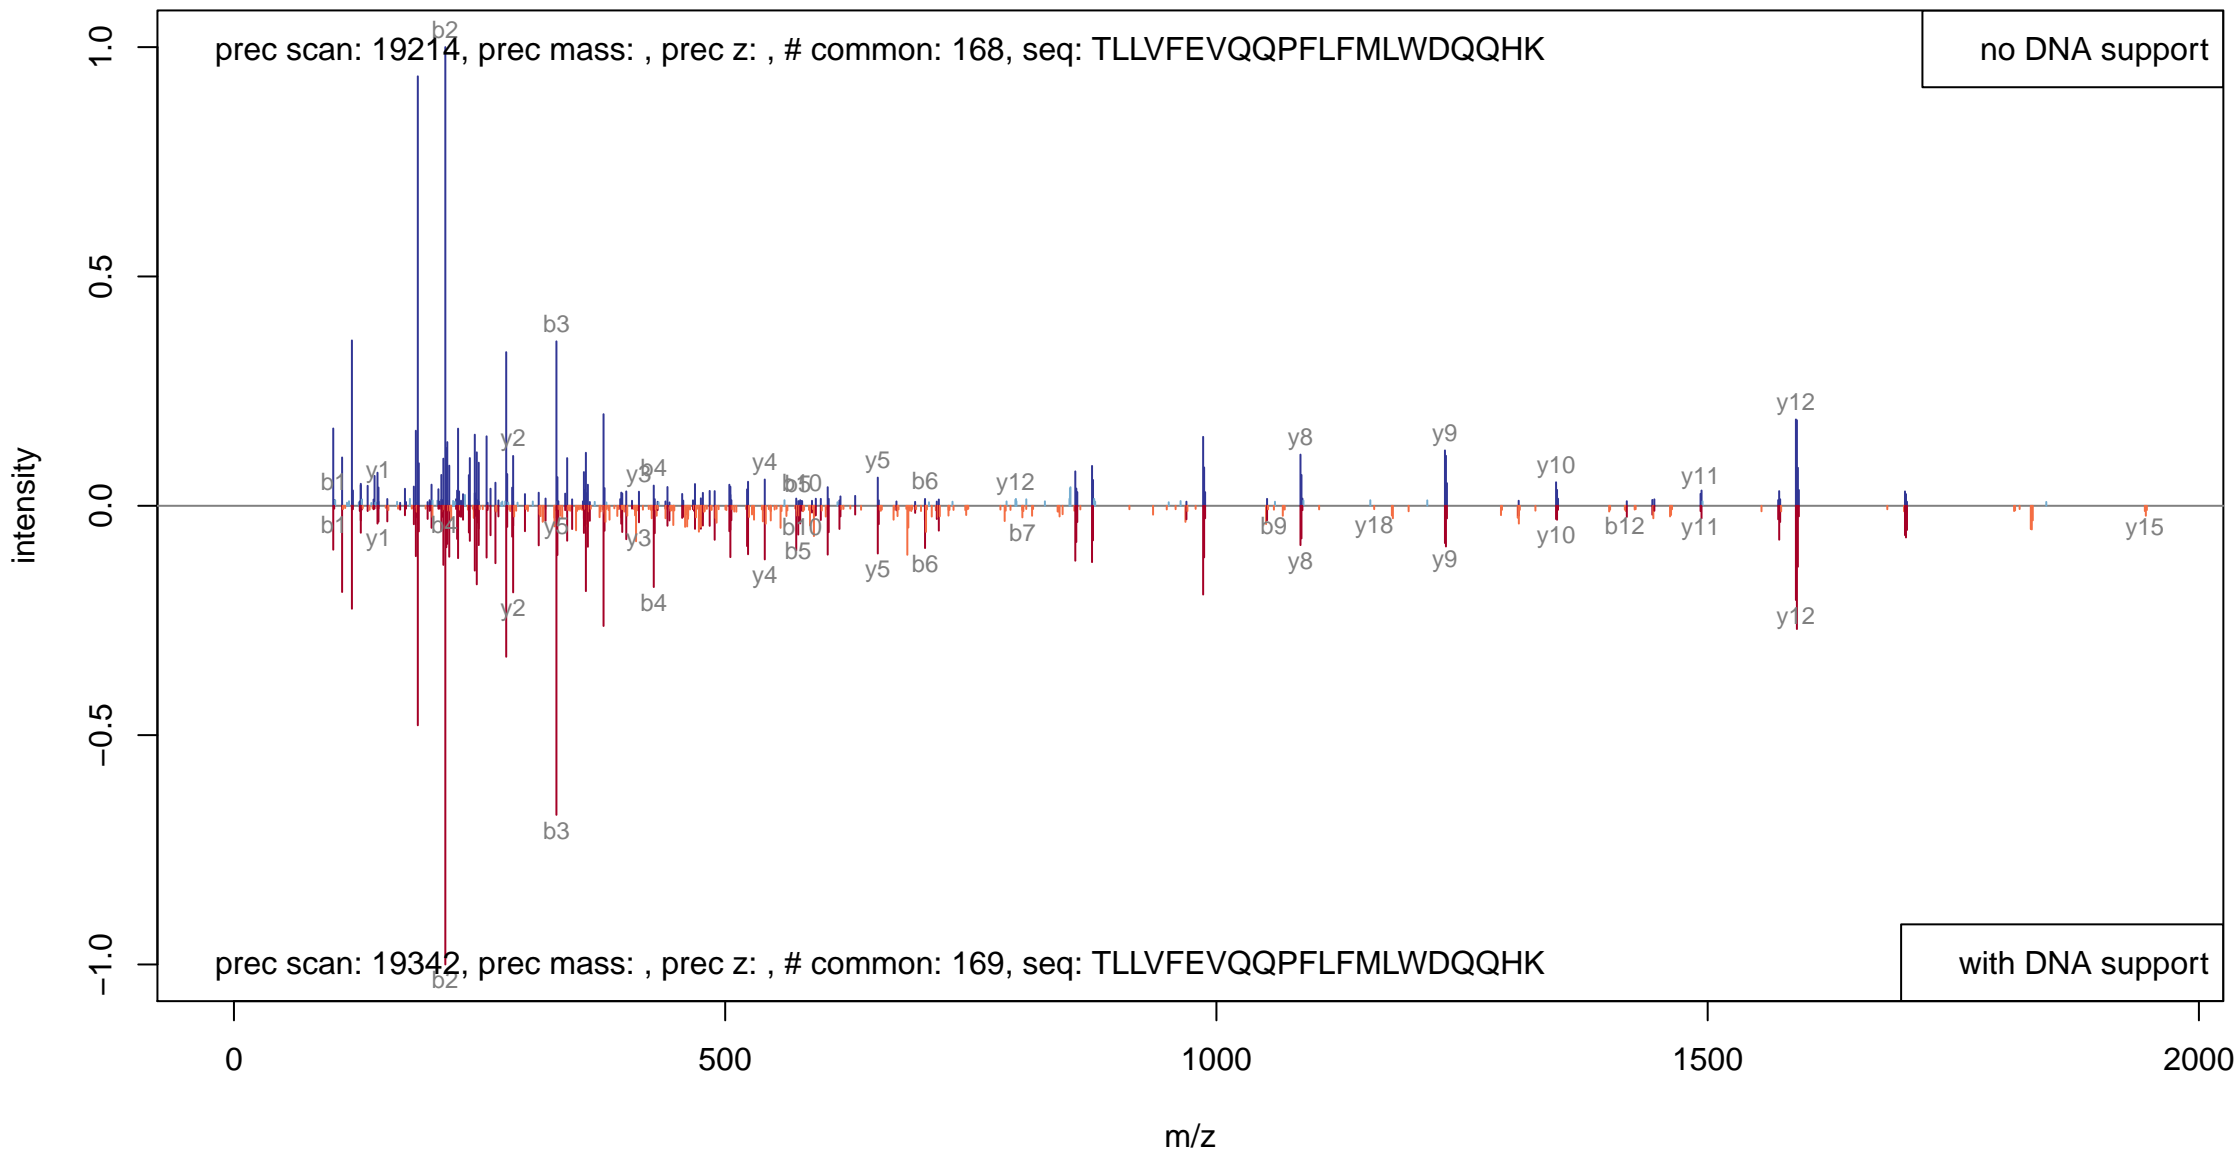

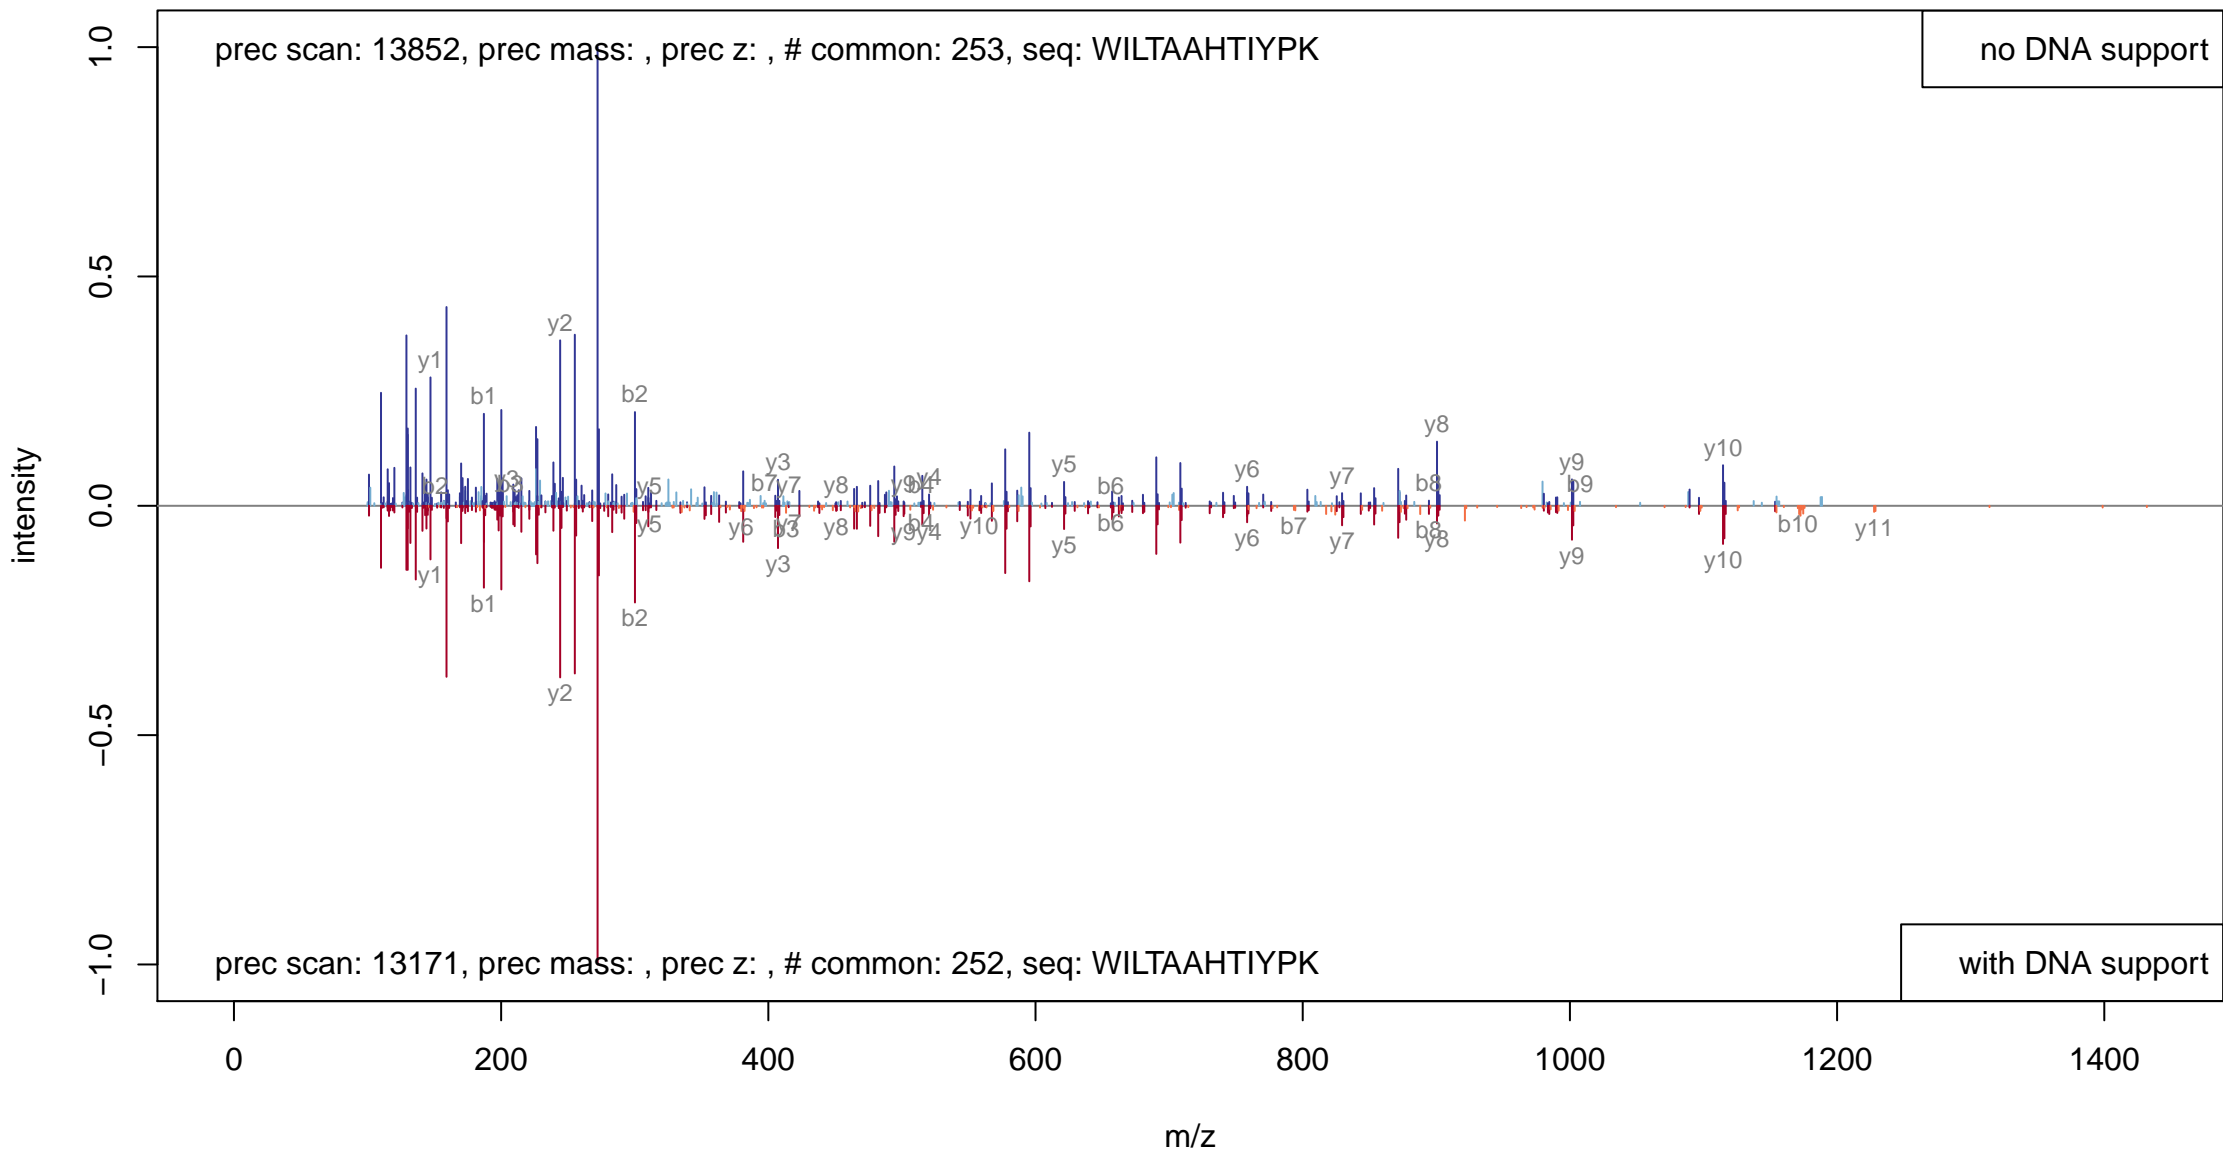

incorrect match

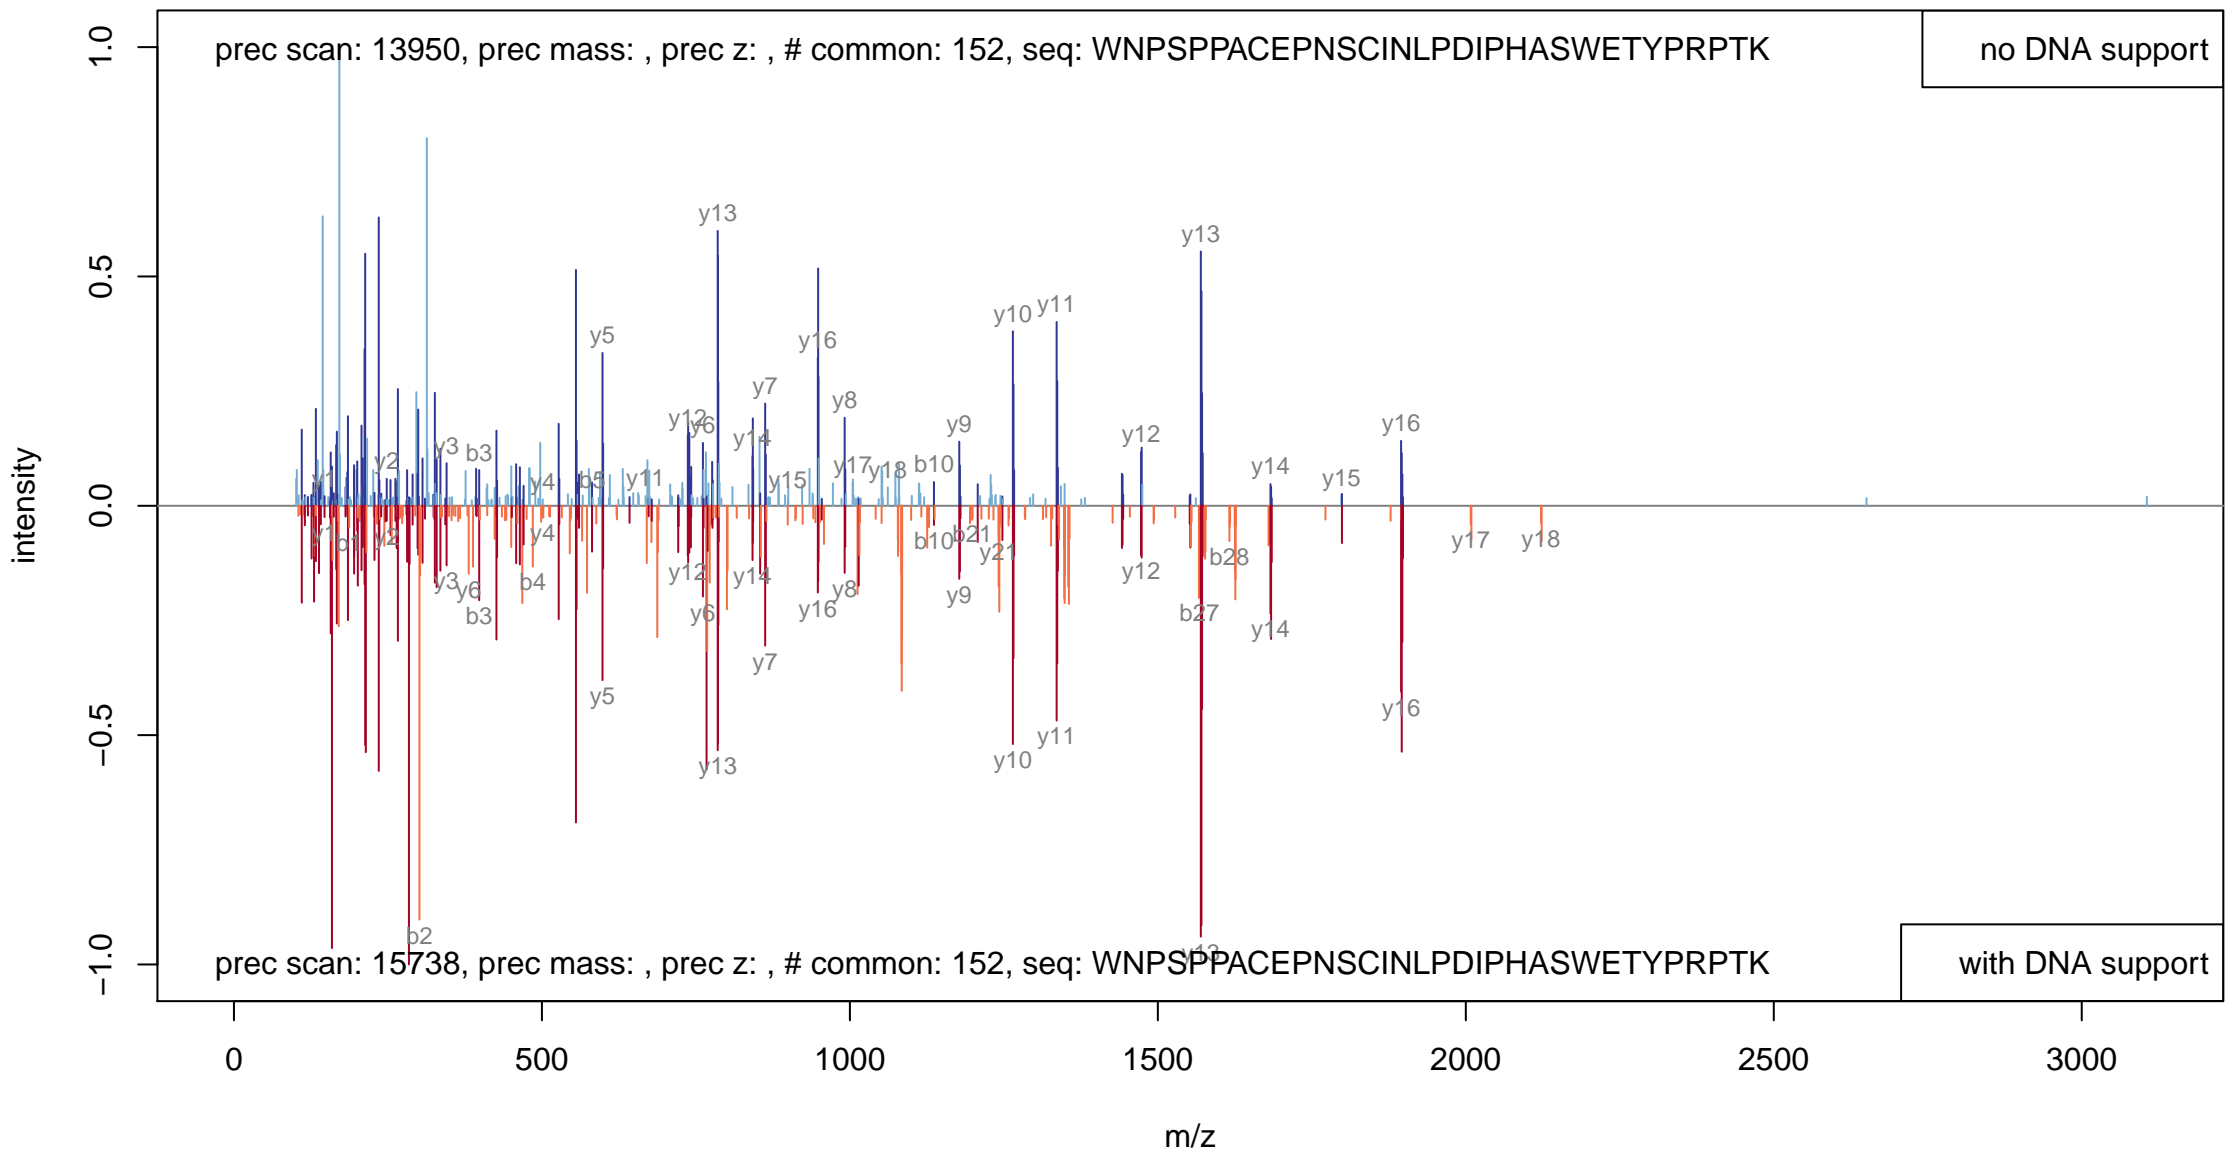

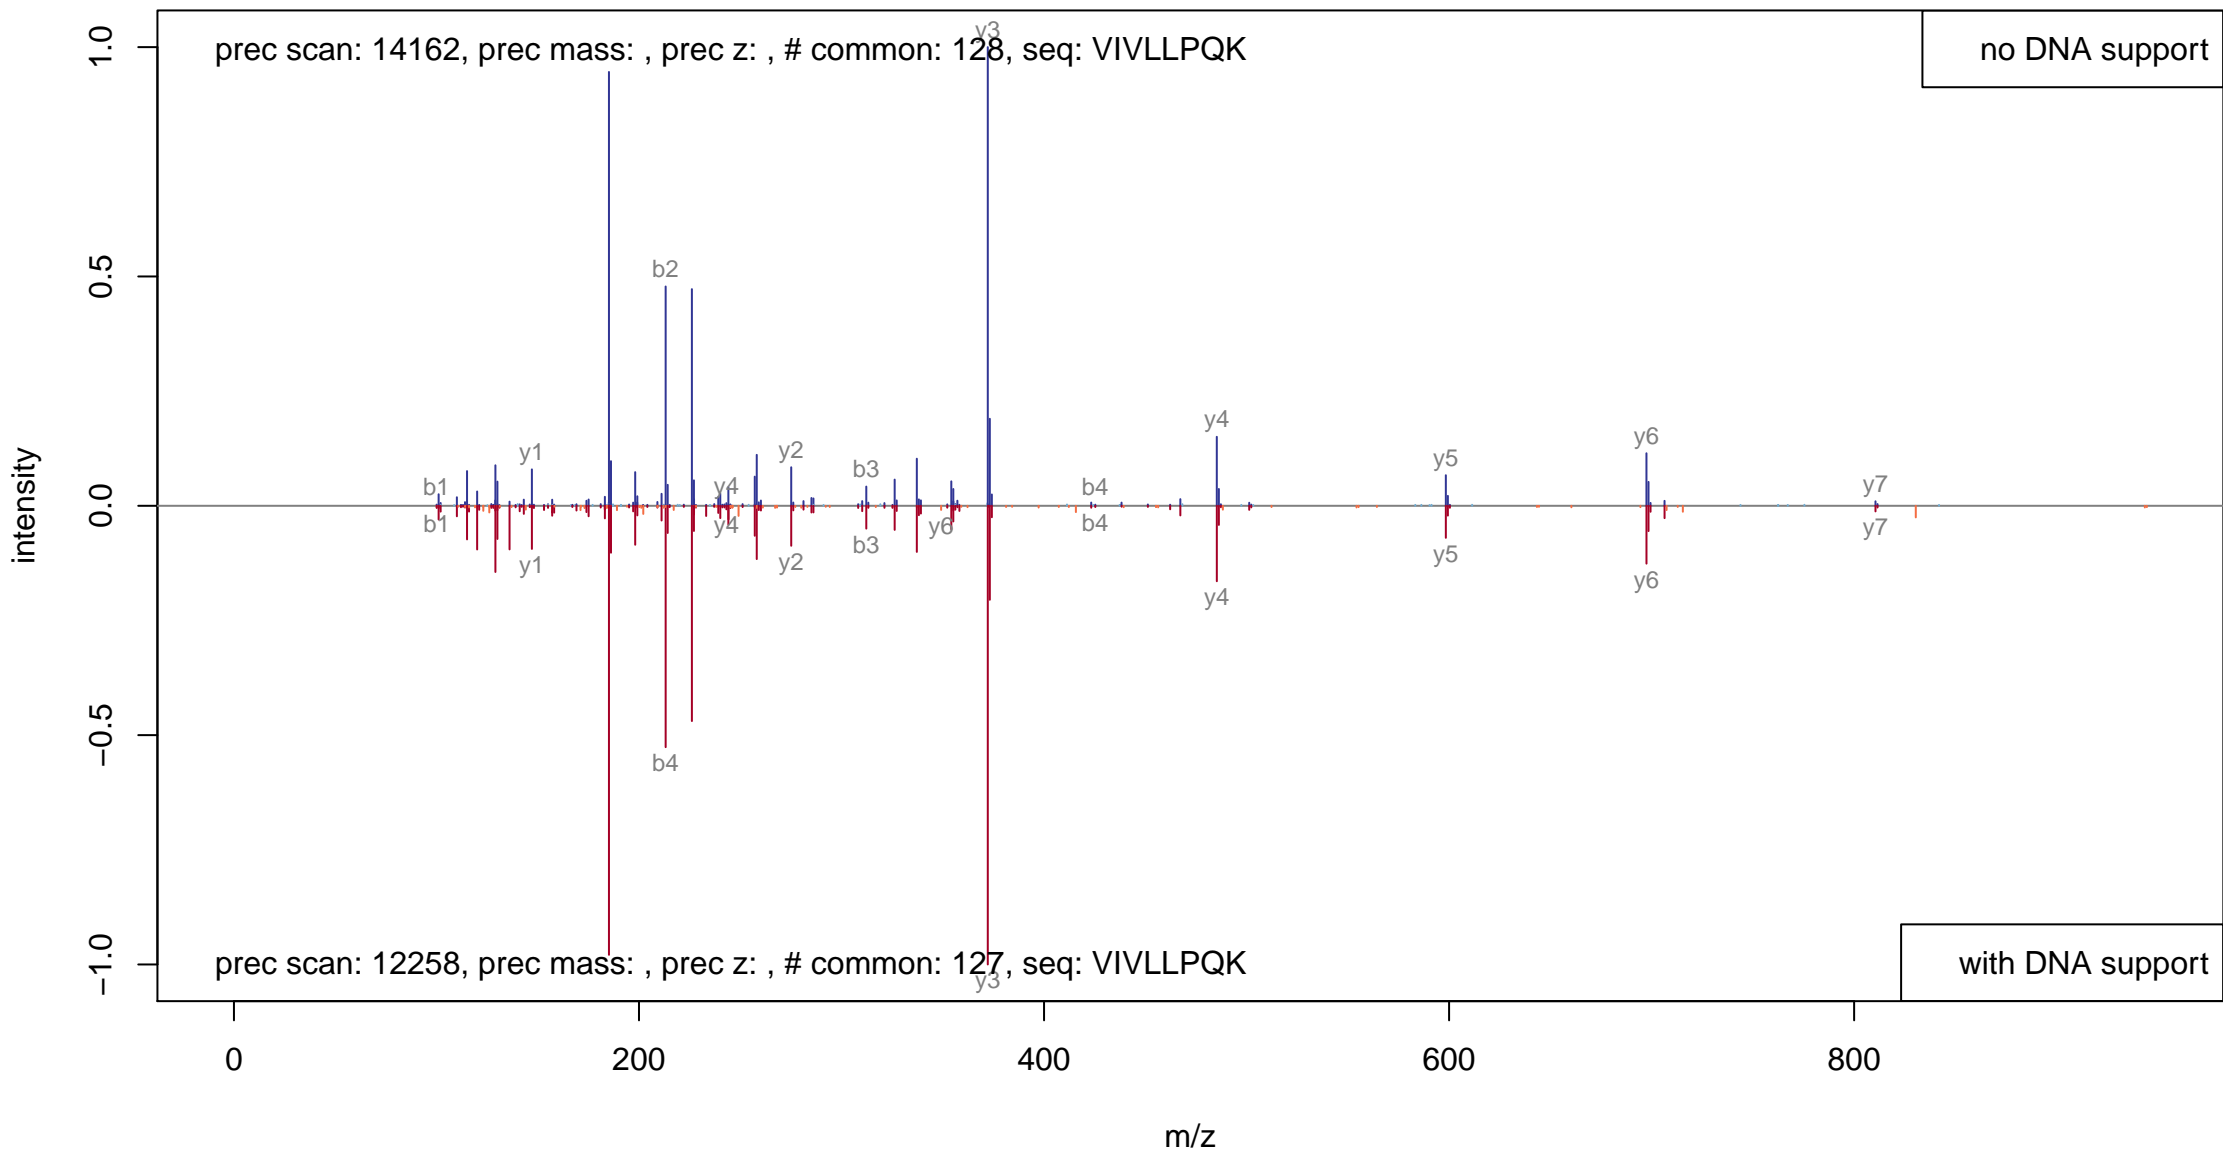

Supplement: elife-41608-supp13.pdf [file elife-41608-supp13.pdf]
