# Supplementary material for: In-depth human plasma proteome analysis captures tissue proteins and transfer of protein variants across the placenta
Source: eLife journal article supplement (doi:10.7554/elife.41608), 2019-04-08
Supplement: supp [file elife_poa_e41608_Figure_1_figure_supplement_6.pdf › elife_poa_e41608_Figure_1_figure_supplement_6.pdf]

A

|           | 126      | 127N     | 127C     | 128N     | 128C     | 129N     | 129C     | 130N     | 130C     | 131      |
|-----------|----------|----------|----------|----------|----------|----------|----------|----------|----------|----------|
| TMT set 1 | donor 1  | donor 1  | donor 3  | donor 4  | donor 5  | donor 6  | donor 7  | donor 8  | standard | standard |
| TMT set 2 | donor 9  | donor 10 | donor 11 | donor 12 | donor 13 | donor 14 | donor 15 | donor 16 | standard | standard |
| TMT set 3 | donor 17 | donor 18 | donor 19 | donor 20 | donor 21 | donor 22 | donor 23 | donor 24 | standard | standard |
| TMT set 4 | donor 25 | donor 26 | donor 27 | donor 28 | donor 29 | donor 30 | standard | standard | standard | standard |

B

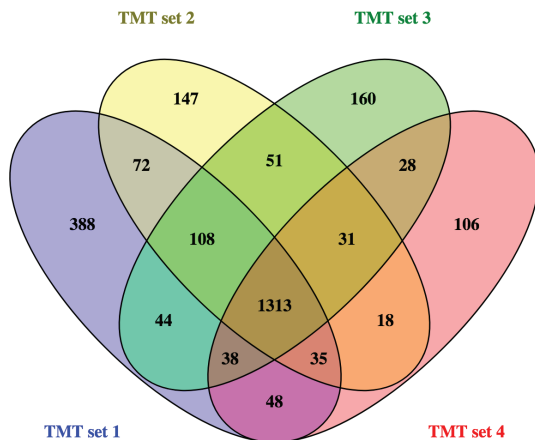

C

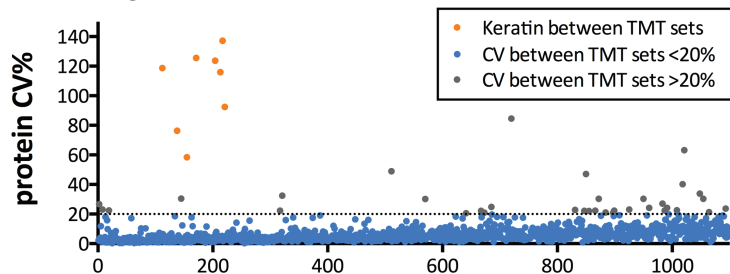

D

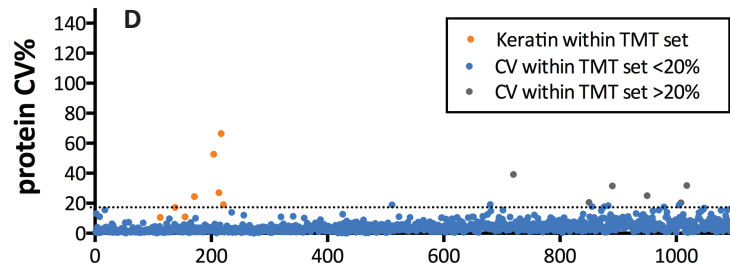

Abundance rank
