# Supplementary material for: In-depth human plasma proteome analysis captures tissue proteins and transfer of protein variants across the placenta
Source: eLife journal article supplement (doi:10.7554/elife.41608), 2019-04-08

**a**

|           | 126      | 127N     | 127C     | 128N     | 128C     | 129N     | 129C     | 130N     | 130C     | 131      |
|-----------|----------|----------|----------|----------|----------|----------|----------|----------|----------|----------|
| TMT set 1 | donor 38 | donor 38 | donor 15 | donor 13 | donor 15 | donor 15 | standard | donor 13 | donor 13 | donor 38 |
| TMT set 2 | donor 07 | donor 07 | donor 29 | donor 29 | standard | donor 07 | standard | donor 29 | donor 29 | donor 07 |
| TMT set 3 | standard | donor 18 | donor 18 | standard | donor 35 | standard | donor 35 | donor 35 | donor 18 | standard |
| TMT set 4 | donor 31 | donor 31 | donor 09 | donor 31 | donor 09 | donor 09 | donor 09 | donor 31 | standard | standard |
| TMT set 5 | donor 04 | donor 04 | standard | donor 19 | donor 04 | donor 39 | donor 19 | donor 04 | donor 19 | donor 19 |

**b**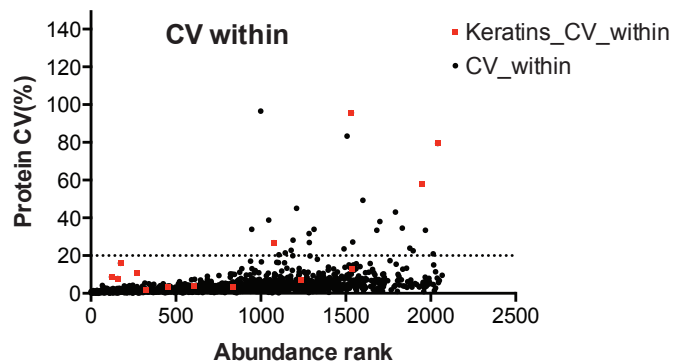**c**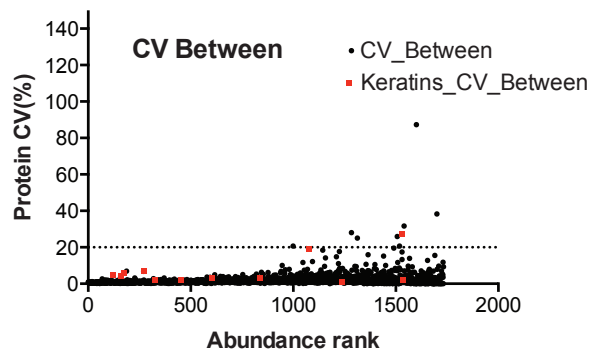**d**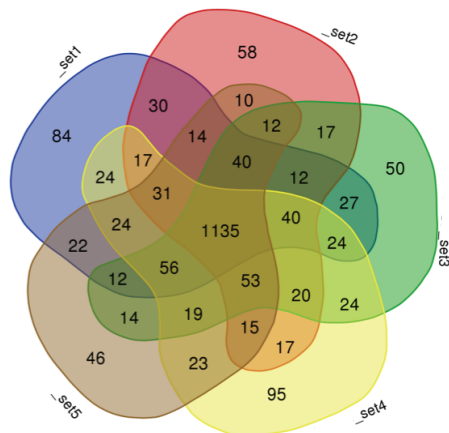**e**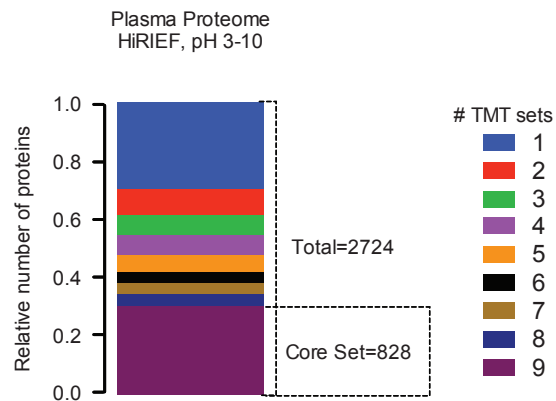

Supplement: supp [file elife_poa_e41608_Figure_1_figure_supplement_7.pdf › elife_poa_e41608_Figure_1_figure_supplement_7.pdf]
