# Supplementary material for: In-depth human plasma proteome analysis captures tissue proteins and transfer of protein variants across the placenta
Source: eLife. 2019 Apr 8;8:e41608. doi: 10.7554/eLife.41608 (PMC6519984; doi:10.7554/eLife.41608)
Supplement: Supplementary file 4. — In total 611 genes were uniquely detected by plasma HiRIEF compared to the PeptideAtlas 2017 build and proteins currently targeted with affinity proteomics assays. Comparative gene ontology enrichment analysis of the HiRIEF unique proteins showed that there was an enrichment of Golgi membrane proteins and MHC complex proteins (provided as an excel file). [file elife-41608-supp4.xlsx]

## Sheet: HiRIEF_merge 3053 proteins
Protein accession	Gene	Associated gene ID	Description	HiRIEF Unique	Coverage	# Proteins	Proteins in group	# Unique peptides	# Peptides	# PSMs	Protein error probability	q-value	PEP	MS1 precursor area
ENSP00000054666	ENSG00000049245	VAMP3	vesicle-associated membrane protein 3 [Source:HGNC Symbol;Acc:HGNC:12644]	yes	0.16	1	ENSP00000054666	1	1	4	0.000391905	0.000460765	0.0172042	2001420
ENSP00000061240	ENSG00000038295	TLL1	tolloid-like 1 [Source:HGNC Symbol;Acc:HGNC:11843]	yes	0.07502467917077986	9	ENSP00000428332,ENSP00000428665,ENSP00000305714,ENSP00000430406,ENSP00000426082,ENSP00000061240,ENSP00000306121,ENSP00000422937,ENSP00000350630	5	6	17	5.40944e-15	0.000157101	0.00699383	4.91486e+07
ENSP00000157812	ENSG00000013275	PSMC4	proteasome (prosome, macropain) 26S subunit, ATPase, 4 [Source:HGNC Symbol;Acc:HGNC:9551]	yes	0.16507177033492823	4	ENSP00000413869,ENSP00000487367,ENSP00000485851,ENSP00000157812	4	4	11	2.34832e-14	0.000157101	0.00699383	219495526
ENSP00000187910	ENSG00000170848	PSG6	pregnancy specific beta-1-glycoprotein 6 [Source:HGNC Symbol;Acc:HGNC:9523]	yes	0.18867924528301888	35	ENSP00000244296,ENSP00000480429,ENSP00000344413,ENSP00000386008,ENSP00000396753,ENSP00000478484,ENSP00000471124,ENSP00000481887,ENSP00000421986,ENSP00000472935,ENSP00000468936,ENSP00000384770,ENSP00000270077,ENSP00000400484,ENSP00000471453,ENSP00000382334,ENSP00000472885,ENSP00000332215,ENSP00000480223,ENSP00000187910,ENSP00000470856,ENSP00000292125,ENSP00000470412,ENSP00000485117,ENSP00000385250…	4	7	81	1.19433e-06	0.000460765	0.0172042	3.30128e+08
ENSP00000194152	ENSG00000081818	PCDHB4	protocadherin beta 4 [Source:HGNC Symbol;Acc:HGNC:8689]	yes	0.05660377358490566	23	ENSP00000239444,ENSP00000485303,ENSP00000438466,ENSP00000345491,ENSP00000231136,ENSP00000194155,ENSP00000485464,ENSP00000477314,ENSP00000485034,ENSP00000231134,ENSP00000231137,ENSP00000231173,ENSP00000478606,ENSP00000239450,ENSP00000485449,ENSP00000485553,ENSP00000231130,ENSP00000194152,ENSP00000485055,ENSP00000444518,ENSP00000239449,ENSP00000346802,ENSP00000239446	1	3	7	0.0367139	0.00261622	0.0661527	17847876
ENSP00000194155	ENSG00000112852	PCDHB2	protocadherin beta 2 [Source:HGNC Symbol;Acc:HGNC:8687]	yes	0.043859649122807015	22	ENSP00000239444,ENSP00000485303,ENSP00000438466,ENSP00000345491,ENSP00000231136,ENSP00000194155,ENSP00000478606,ENSP00000477314,ENSP00000485034,ENSP00000231134,ENSP00000231137,ENSP00000485464,ENSP00000239450,ENSP00000231173,ENSP00000485553,ENSP00000231130,ENSP00000194152,ENSP00000485055,ENSP00000239449,ENSP00000444518,ENSP00000346802,ENSP00000239446	1	2	2	0.00539888	0.000755242	0.0250629	NA
ENSP00000216218	ENSG00000100380	ST13	suppression of tumorigenicity 13 (colon carcinoma) (Hsp70 interacting protein) [Source:HGNC Symbol;Acc:HGNC:11343]	yes	0.1897018970189702	6	ENSP00000481328,ENSP00000397062,ENSP00000484210,ENSP00000216218,ENSP00000392067,ENSP00000412049	6	6	58	2.05517e-17	0.000157101	0.00699383	7.14391e+07
ENSP00000218032	ENSG00000101916	TLR8	toll-like receptor 8 [Source:HGNC Symbol;Acc:HGNC:15632]	yes	0.04514889529298751	2	ENSP00000312082,ENSP00000218032	4	4	8	2.03358e-05	0.000460765	0.0172042	1.8875e+07
ENSP00000219271	ENSG00000102996	MMP15	matrix metallopeptidase 15 (membrane-inserted) [Source:HGNC Symbol;Acc:HGNC:7161]	yes	0.02242152466367713	1	ENSP00000219271	1	1	2	6.80749e-07	0.000157101	0.00699383	86310264
ENSP00000220562	ENSG00000012232	EXTL3	exostosin-like glycosyltransferase 3 [Source:HGNC Symbol;Acc:HGNC:3518]	yes	0.025027203482045703	3	ENSP00000220562,ENSP00000428691,ENSP00000429627	2	2	3	0.0407551	0.00338313	0.0815232	201718
ENSP00000221922	ENSG00000105321	CCDC9	coiled-coil domain containing 9 [Source:HGNC Symbol;Acc:HGNC:24560]	yes	0.03954802259887006	1	ENSP00000221922	1	1	1	0.000829424	0.000460765	0.0172042	NA
ENSP00000223023	ENSG00000106299	WASL	Wiskott-Aldrich syndrome-like [Source:HGNC Symbol;Acc:HGNC:12735]	yes	0.015841584158415842	1	ENSP00000223023	1	1	1	0.0523906	0.0031314	0.0766336	NA
ENSP00000223865	ENSG00000107021	TBC1D13	TBC1 domain family, member 13 [Source:HGNC Symbol;Acc:HGNC:25571]	yes	0.06181818181818182	2	ENSP00000361731,ENSP00000223865	2	2	3	1.09163e-05	0.000157101	0.00699383	1614965
ENSP00000225525	ENSG00000213977	TAX1BP3	Tax1 (human T-cell leukemia virus type I) binding protein 3 [Source:HGNC Symbol;Acc:HGNC:30684]	yes	0.13709677419354838	1	ENSP00000225525	1	1	4	5.01269e-05	0.000157101	0.00699383	4.02584e+06
ENSP00000227525	ENSG00000110108	TMEM109	transmembrane protein 109 [Source:HGNC Symbol;Acc:HGNC:28771]	yes	0.04938271604938271	2	ENSP00000227525,ENSP00000443990	1	1	10	0.002745	0.000460765	0.0172042	2.62654e+07
ENSP00000229812	ENSG00000112079	STK38	serine/threonine kinase 38 [Source:HGNC Symbol;Acc:HGNC:17847]	yes	0.047311827956989246	1	ENSP00000229812	2	2	2	0.00427419	0.00261622	0.0661527	NA
ENSP00000230236	ENSG00000112474	HSD17B8	hydroxysteroid (17-beta) dehydrogenase 8 [Source:HGNC Symbol;Acc:HGNC:3554]	yes	0.05747126436781609	6	ENSP00000230236,ENSP00000413950,ENSP00000363794,ENSP00000406488,ENSP00000403538,ENSP00000387753	1	1	2	0.00159025	0.000460765	0.0172042	1753798
ENSP00000231134	ENSG00000113209	PCDHB5	protocadherin beta 5 [Source:HGNC Symbol;Acc:HGNC:8690]	yes	0.09056603773584905	23	ENSP00000239444,ENSP00000485303,ENSP00000438466,ENSP00000345491,ENSP00000231136,ENSP00000194155,ENSP00000485464,ENSP00000477314,ENSP00000485034,ENSP00000231134,ENSP00000231137,ENSP00000231173,ENSP00000478606,ENSP00000239450,ENSP00000485449,ENSP00000485553,ENSP00000231130,ENSP00000194152,ENSP00000485055,ENSP00000444518,ENSP00000239449,ENSP00000346802,ENSP00000239446	3	5	12	0.000634653	0.000460765	0.0172042	NA
ENSP00000231137	ENSG00000113212	PCDHB7	protocadherin beta 7 [Source:HGNC Symbol;Acc:HGNC:8692]	yes	0.0832282471626734	23	ENSP00000239444,ENSP00000485303,ENSP00000438466,ENSP00000345491,ENSP00000231136,ENSP00000194155,ENSP00000485464,ENSP00000477314,ENSP00000485034,ENSP00000231134,ENSP00000231137,ENSP00000231173,ENSP00000478606,ENSP00000239450,ENSP00000485449,ENSP00000485553,ENSP00000231130,ENSP00000194152,ENSP00000485055,ENSP00000444518,ENSP00000239449,ENSP00000346802,ENSP00000239446	3	5	11	0.00240785	0.00261622	0.0661527	2.83017e+08
ENSP00000231173	ENSG00000113248	PCDHB15	protocadherin beta 15 [Source:HGNC Symbol;Acc:HGNC:8686]	yes	0.11308767471410419	22	ENSP00000239444,ENSP00000485303,ENSP00000438466,ENSP00000345491,ENSP00000231136,ENSP00000194155,ENSP00000478606,ENSP00000477314,ENSP00000485034,ENSP00000231134,ENSP00000231137,ENSP00000485464,ENSP00000239450,ENSP00000231173,ENSP00000485553,ENSP00000231130,ENSP00000194152,ENSP00000485055,ENSP00000239449,ENSP00000444518,ENSP00000346802,ENSP00000239446	5	6	27	3.39132e-22	0.000157101	0.00699383	7.21067e+08
ENSP00000233379	ENSG00000115042	FAHD2A	fumarylacetoacetate hydrolase domain containing 2A [Source:HGNC Symbol;Acc:HGNC:24252]	yes	0.05732484076433121	4	ENSP00000233379,ENSP00000410470,ENSP00000406424,ENSP00000272610	1	1	1	0.000192229	0.000460765	0.0172042	NA
ENSP00000237019	ENSG00000118276	B4GALT6	UDP-Gal:betaGlcNAc beta 1,4- galactosyltransferase, polypeptide 6 [Source:HGNC Symbol;Acc:HGNC:929]	yes	0.043731778425655975	3	ENSP00000306459,ENSP00000372613,ENSP00000237019	1	1	2	0.000162626	0.000460765	0.0172042	381683
ENSP00000240617	ENSG00000121316	PLBD1	phospholipase B domain containing 1 [Source:HGNC Symbol;Acc:HGNC:26215]	yes	0.0216998191681736	1	ENSP00000240617	1	1	7	0.00128002	0.000460765	0.0172042	9.17215e+06
ENSP00000241305	ENSG00000121898	CPXM2	carboxypeptidase X (M14 family), member 2 [Source:HGNC Symbol;Acc:HGNC:26977]	yes	0.0992063492063492	2	ENSP00000241305,ENSP00000483180	5	5	5	7.21942e-07	0.000460765	0.0172042	NA
ENSP00000242152	ENSG00000122585	NPY	neuropeptide Y [Source:HGNC Symbol;Acc:HGNC:7955]	yes	0.13402061855670103	3	ENSP00000384364,ENSP00000385282,ENSP00000242152	1	1	3	0.00034839	0.000460765	0.0172042	6096121
ENSP00000242783	ENSG00000123143	PKN1	protein kinase N1 [Source:HGNC Symbol;Acc:HGNC:9405]	yes	0.014861995753715499	2	ENSP00000343325,ENSP00000242783	1	1	1	0.00121808	0.000460765	0.0172042	17380976
ENSP00000243786	ENSG00000123999	INHA	inhibin, alpha [Source:HGNC Symbol;Acc:HGNC:6065]	yes	0.03278688524590164	1	ENSP00000243786	1	1	4	0.000300262	0.000460765	0.0172042	1.61861e+06
ENSP00000243983	ENSG00000124159	MATN4	matrilin 4 [Source:HGNC Symbol;Acc:HGNC:6910]	yes	0.028056112224448898	5	ENSP00000361842,ENSP00000440328,ENSP00000361840,ENSP00000243983,ENSP00000353819	1	1	3	1.44052e-06	0.000157101	0.00699383	1273701
ENSP00000244537	ENSG00000274618	HIST1H4F	histone cluster 1, H4f [Source:HGNC Symbol;Acc:HGNC:4783]	yes	0.4077669902912621	20	ENSP00000366956,ENSP00000481486,ENSP00000478519,ENSP00000478786,ENSP00000479106,ENSP00000484789,ENSP00000480960,ENSP00000443017,ENSP00000482412,ENSP00000481343,ENSP00000350767,ENSP00000367034,ENSP00000481507,ENSP00000244537,ENSP00000462667,ENSP00000366974,ENSP00000347168,ENSP00000462355,ENSP00000479461,ENSP00000479794	4	4	73	2.62672e-10	0.000460765	0.0172042	193256892
ENSP00000244669	ENSG00000124701	APOBEC2	apolipoprotein B mRNA editing enzyme, catalytic polypeptide-like 2 [Source:HGNC Symbol;Acc:HGNC:605]	yes	0.06696428571428571	1	ENSP00000244669	1	1	2	9.085e-05	0.000157101	0.00699383	NA
ENSP00000244766	ENSG00000124785	NRN1	neuritin 1 [Source:HGNC Symbol;Acc:HGNC:17972]	yes	0.28169014084507044	3	ENSP00000484055,ENSP00000244766,ENSP00000480483	2	2	8	1.58575e-10	0.000157101	0.00699383	1401313
ENSP00000244926	ENSG00000124935	SCGB1D2	secretoglobin, family 1D, member 2 [Source:HGNC Symbol;Acc:HGNC:18396]	yes	0.12222222222222222	1	ENSP00000244926	1	1	12	0.000170887	0.000460765	0.0172042	2642313
ENSP00000246314	ENSG00000126070	AGO3	argonaute RISC catalytic component 3 [Source:HGNC Symbol;Acc:HGNC:18421]	yes	0.039936102236421724	6	ENSP00000430176,ENSP00000362287,ENSP00000362300,ENSP00000246314,ENSP00000362302,ENSP00000220592	1	2	7	0.0385341	0.00261622	0.0661527	2.48952e+09
ENSP00000248899	ENSG00000100365	NCF4	neutrophil cytosolic factor 4, 40kDa [Source:HGNC Symbol;Acc:HGNC:7662]	yes	0.0943952802359882	7	ENSP00000248899,ENSP00000486446,ENSP00000380334,ENSP00000483977,ENSP00000414958,ENSP00000486744,ENSP00000486471	3	3	11	1.65665e-08	0.000157101	0.00699383	8.245e+06
ENSP00000249005	ENSG00000128274	A4GALT	alpha 1,4-galactosyltransferase [Source:HGNC Symbol;Acc:HGNC:18149]	yes	0.11331444759206799	3	ENSP00000384794,ENSP00000370678,ENSP00000249005	3	3	4	4.07709e-09	0.000157101	0.00699383	8.70877e+06
ENSP00000249116	ENSG00000128383	APOBEC3A	apolipoprotein B mRNA editing enzyme, catalytic polypeptide-like 3A [Source:HGNC Symbol;Acc:HGNC:17343]	yes	0.04522613065326633	8	ENSP00000385060,ENSP00000461288,ENSP00000327459,ENSP00000481904,ENSP00000384359,ENSP00000249116,ENSP00000385068,ENSP00000485234	1	1	1	0.0325234	0.00261622	0.0661527	4739410
ENSP00000249377	ENSG00000128606	LRRC17	leucine rich repeat containing 17 [Source:HGNC Symbol;Acc:HGNC:16895]	yes	0.13738019169329074	2	ENSP00000249377,ENSP00000344242	2	2	2	0.000848859	0.000460765	0.0172042	981506
ENSP00000250930	ENSG00000129925	TMEM8A	transmembrane protein 8A [Source:HGNC Symbol;Acc:HGNC:17205]	yes	0.04152249134948097	3	ENSP00000250930,ENSP00000397620,ENSP00000401338	2	2	3	4.23367e-05	0.000157101	0.00699383	353290
ENSP00000252252	ENSG00000185479	KRT6B	keratin 6B, type II [Source:HGNC Symbol;Acc:HGNC:6444]	yes	0.3067375886524823	39	ENSP00000447402,ENSP00000447881,ENSP00000448207,ENSP00000448767,ENSP00000479984,ENSP00000252242,ENSP00000310861,ENSP00000346269,ENSP00000441160,ENSP00000252252,ENSP00000267119,ENSP00000369317,ENSP00000329243,ENSP00000447040,ENSP00000330101,ENSP00000448220,ENSP00000252245,ENSP00000413479,ENSP00000447209,ENSP00000446881,ENSP00000328358,ENSP00000307014,ENSP00000252244,ENSP00000342710,ENSP00000307240…	1	21	231	0.0590592	0.00391009	0.092069	5.56195e+06
ENSP00000252593	ENSG00000130303	BST2	bone marrow stromal cell antigen 2 [Source:HGNC Symbol;Acc:HGNC:1119]	yes	0.05555555555555555	1	ENSP00000252593	1	1	3	0.00886116	0.00101792	0.0312306	738128976
ENSP00000252599	ENSG00000130309	COLGALT1	collagen beta(1-O)galactosyltransferase 1 [Source:HGNC Symbol;Acc:HGNC:26182]	yes	0.03697749196141479	2	ENSP00000252599,ENSP00000468947	2	2	5	0.000162978	0.000460765	0.0172042	41068484
ENSP00000252699	ENSG00000130402	ACTN4	actinin, alpha 4 [Source:HGNC Symbol;Acc:HGNC:166]	yes	0.1756311745334797	21	ENSP00000252699,ENSP00000193403,ENSP00000398393,ENSP00000450925,ENSP00000450764,ENSP00000450903,ENSP00000377941,ENSP00000414272,ENSP00000439497,ENSP00000443495,ENSP00000439828,ENSP00000452254,ENSP00000366035,ENSP00000452423,ENSP00000355537,ENSP00000411187,ENSP00000426797,ENSP00000467190,ENSP00000465176,ENSP00000422007,ENSP00000450618	9	11	29	1.16341e-33	0.000157101	0.00699383	43675410
ENSP00000253023	ENSG00000130725	UBE2M	ubiquitin-conjugating enzyme E2M [Source:HGNC Symbol;Acc:HGNC:12491]	yes	0.19672131147540983	2	ENSP00000253023,ENSP00000469855	3	3	4	1.3823e-08	0.000460765	0.0172042	2370293
ENSP00000253407	ENSG00000131094	C1QL1	complement component 1, q subcomponent-like 1 [Source:HGNC Symbol;Acc:HGNC:24182]	yes	0.06976744186046512	1	ENSP00000253407	1	1	1	3.64134e-07	0.000157101	0.00699383	4579727
ENSP00000254770	ENSG00000132434	LANCL2	LanC lantibiotic synthetase component C-like 2 (bacterial) [Source:HGNC Symbol;Acc:HGNC:6509]	yes	0.07111111111111111	1	ENSP00000254770	2	2	6	1.81136e-09	0.000157101	0.00699383	4059545
ENSP00000255631	ENSG00000133265	HSPBP1	HSPA (heat shock 70kDa) binding protein, cytoplasmic cochaperone 1 [Source:HGNC Symbol;Acc:HGNC:24989]	yes	0.1392757660167131	4	ENSP00000398244,ENSP00000255631,ENSP00000466749,ENSP00000467574	4	4	6	0.00169704	0.00181664	0.0491923	1826819
ENSP00000255681	ENSG00000133315	MACROD1	MACRO domain containing 1 [Source:HGNC Symbol;Acc:HGNC:29598]	yes	0.033846153846153845	1	ENSP00000255681	1	1	2	0.00614963	0.00101792	0.0312306	1936585
ENSP00000256593	ENSG00000134201	GSTM5	glutathione S-transferase mu 5 [Source:HGNC Symbol;Acc:HGNC:4637]	yes	0.13761467889908258	14	ENSP00000456315,ENSP00000358842,ENSP00000234981,ENSP00000241337,ENSP00000358846,ENSP00000358828,ENSP00000416883,ENSP00000358844,ENSP00000311469,ENSP00000358838,ENSP00000256593,ENSP00000404662,ENSP00000358827,ENSP00000435910	2	3	25	0.0660978	0.00717386	0.152337	5.3709e+06
ENSP00000256682	ENSG00000134287	ARF3	ADP-ribosylation factor 3 [Source:HGNC Symbol;Acc:HGNC:654]	yes	0.2430939226519337	13	ENSP00000412701,ENSP00000395370,ENSP00000272102,ENSP00000000233,ENSP00000443189,ENSP00000438507,ENSP00000440005,ENSP00000306010,ENSP00000256682,ENSP00000438063,ENSP00000420254,ENSP00000442980,ENSP00000438510	3	4	19	0.000118227	0.000460765	0.0172042	1.63073e+07
ENSP00000256830	ENSG00000049759	NEDD4L	neural precursor cell expressed, developmentally down-regulated 4-like, E3 ubiquitin protein ligase [Source:HGNC Symbol;Acc:HGNC:7728]	yes	0.021814006888633754	13	ENSP00000410613,ENSP00000421047,ENSP00000348847,ENSP00000372301,ENSP00000468332,ENSP00000393395,ENSP00000350569,ENSP00000411947,ENSP00000468546,ENSP00000389406,ENSP00000405440,ENSP00000256830,ENSP00000383199	2	2	5	0.00311719	0.00101792	0.0312306	4.54677e+06
ENSP00000256854	ENSG00000134440	NARS	asparaginyl-tRNA synthetase [Source:HGNC Symbol;Acc:HGNC:7643]	yes	0.020072992700729927	1	ENSP00000256854	1	1	1	0.00171311	0.000460765	0.0172042	991940
ENSP00000257189	ENSG00000134757	DSG3	desmoglein 3 [Source:HGNC Symbol;Acc:HGNC:3050]	yes	0.12212212212212212	1	ENSP00000257189	9	9	29	1.87883e-24	0.000157101	0.00699383	1.00557e+07
ENSP00000259339	ENSG00000136816	TOR1B	torsin family 1, member B (torsin B) [Source:HGNC Symbol;Acc:HGNC:11995]	yes	0.10416666666666667	1	ENSP00000259339	3	3	21	3.4383e-11	0.000157101	0.00699383	7533468
ENSP00000259726	ENSG00000137197	CDSN	corneodesmosin [Source:HGNC Symbol;Acc:HGNC:1802]	yes	0.045454545454545456	6	ENSP00000392863,ENSP00000373023,ENSP00000259726,ENSP00000365465,ENSP00000399604,ENSP00000388386	1	1	2	7.40545e-05	0.000157101	0.00699383	659299
ENSP00000260113	ENSG00000137558	PI15	peptidase inhibitor 15 [Source:HGNC Symbol;Acc:HGNC:8946]	yes	0.03875968992248062	2	ENSP00000260113,ENSP00000428567	1	1	6	0.0638283	0.00443372	0.102239	3.27643e+07
ENSP00000260197	ENSG00000137642	SORL1	sortilin-related receptor, L(DLR class) A repeats containing [Source:HGNC Symbol;Acc:HGNC:11185]	yes	0.014905149051490514	1	ENSP00000260197	3	3	3	7.3085e-09	0.000460765	0.0172042	3.66426e+07
ENSP00000261210	ENSG00000120802	TMPO	thymopoietin [Source:HGNC Symbol;Acc:HGNC:11875]	yes	0.11290322580645161	5	ENSP00000376773,ENSP00000450627,ENSP00000340251,ENSP00000266732,ENSP00000261210	2	2	5	2.83204e-08	0.000157101	0.00699383	1474352
ENSP00000261776	ENSG00000103043	VAC14	Vac14 homolog (S. cerevisiae) [Source:HGNC Symbol;Acc:HGNC:25507]	yes	0.07544757033248081	1	ENSP00000261776	2	2	2	7.1523e-06	0.000157101	0.00699383	4794460
ENSP00000261800	ENSG00000086570	FAT2	FAT atypical cadherin 2 [Source:HGNC Symbol;Acc:HGNC:3596]	yes	0.08231777420096574	2	ENSP00000261800,ENSP00000429678	25	25	85	8.49003e-85	0.000157101	0.00699383	342240760
ENSP00000262113	ENSG00000036448	MYOM2	myomesin 2 [Source:HGNC Symbol;Acc:HGNC:7614]	yes	0.060068259385665526	3	ENSP00000428396,ENSP00000262113,ENSP00000478322	7	7	19	2.52631e-16	0.000157101	0.00699383	1.45447e+07
ENSP00000262631	ENSG00000105711	SCN1B	sodium channel, voltage gated, type I beta subunit [Source:HGNC Symbol;Acc:HGNC:10586]	yes	0.0779816513761468	2	ENSP00000262631,ENSP00000396915	1	1	1	0.0106655	0.00101792	0.0312306	NA
ENSP00000262738	ENSG00000075275	CELSR1	cadherin, EGF LAG seven-pass G-type receptor 1 [Source:HGNC Symbol;Acc:HGNC:1850]	yes	0.05242203052422031	3	ENSP00000414689,ENSP00000262738,ENSP00000271332	9	10	70	4.11409e-42	0.000157101	0.00699383	451291232
ENSP00000262932	ENSG00000166997	CNPY4	canopy FGF signaling regulator 4 [Source:HGNC Symbol;Acc:HGNC:28631]	yes	0.09274193548387097	1	ENSP00000262932	2	2	2	5.25793e-06	0.000460765	0.0172042	1972403
ENSP00000263093	ENSG00000083807	SLC27A5	solute carrier family 27 (fatty acid transporter), member 5 [Source:HGNC Symbol;Acc:HGNC:10999]	yes	0.02608695652173913	2	ENSP00000263093,ENSP00000470368	2	2	2	0.0211921	0.00235474	0.0608439	12424369
ENSP00000263321	ENSG00000077498	TYR	tyrosinase [Source:HGNC Symbol;Acc:HGNC:12442]	yes	0.04725897920604915	1	ENSP00000263321	1	1	1	3.71658e-06	0.000157101	0.00699383	NA
ENSP00000263816	ENSG00000081479	LRP2	low density lipoprotein receptor-related protein 2 [Source:HGNC Symbol;Acc:HGNC:6694]	yes	0.007733619763694952	1	ENSP00000263816	2	2	7	0.0162292	0.00235474	0.0608439	552118658
ENSP00000264363	ENSG00000138653	NDST4	N-deacetylase/N-sulfotransferase (heparan glucosaminyl) 4 [Source:HGNC Symbol;Acc:HGNC:20779]	yes	0.022935779816513763	4	ENSP00000264363,ENSP00000423218,ENSP00000483949,ENSP00000296499	2	2	2	0.0587762	0.00614045	0.134115	8.80218e+06
ENSP00000264463	ENSG00000040731	CDH10	cadherin 10, type 2 (T2-cadherin) [Source:HGNC Symbol;Acc:HGNC:1749]	yes	0.05710659898477157	2	ENSP00000264463,ENSP00000425653	3	3	5	1.8534e-11	0.000157101	0.00699383	3.05346e+06
ENSP00000264560	ENSG00000099864	PALM	paralemmin [Source:HGNC Symbol;Acc:HGNC:8594]	yes	0.07580174927113703	4	ENSP00000341911,ENSP00000480594,ENSP00000264560,ENSP00000477952	2	2	3	0.000662804	0.000460765	0.0172042	191876624
ENSP00000265073	ENSG00000113387	SUB1	SUB1 homolog (S. cerevisiae) [Source:HGNC Symbol;Acc:HGNC:19985]	yes	0.08661417322834646	5	ENSP00000427100,ENSP00000265073,ENSP00000422078,ENSP00000422806,ENSP00000426850	1	1	2	0.0214921	0.00126687	0.0366317	16558354
ENSP00000265361	ENSG00000075223	SEMA3C	sema domain, immunoglobulin domain (Ig), short basic domain, secreted, (semaphorin) 3C [Source:HGNC Symbol;Acc:HGNC:10725]	yes	0.02529960053262317	2	ENSP00000411193,ENSP00000265361	2	2	8	0.00115654	0.00181664	0.0491923	10091722
ENSP00000265734	ENSG00000105810	CDK6	cyclin-dependent kinase 6 [Source:HGNC Symbol;Acc:HGNC:1777]	yes	0.03067484662576687	2	ENSP00000265734,ENSP00000397087	1	1	3	0.00184547	0.000460765	0.0172042	3.73359e+08
ENSP00000266556	ENSG00000139192	TAPBPL	TAP binding protein-like [Source:HGNC Symbol;Acc:HGNC:30683]	yes	0.02564102564102564	1	ENSP00000266556	1	1	1	0.000582612	0.000460765	0.0172042	NA
ENSP00000271332	ENSG00000143126	CELSR2	cadherin, EGF LAG seven-pass G-type receptor 2 [Source:HGNC Symbol;Acc:HGNC:3231]	yes	0.023947998631542934	3	ENSP00000414689,ENSP00000262738,ENSP00000271332	4	5	9	2.97716e-07	0.000460765	0.0172042	107770824
ENSP00000271532	ENSG00000163518	FCRL4	Fc receptor-like 4 [Source:HGNC Symbol;Acc:HGNC:18507]	yes	0.017475728155339806	1	ENSP00000271532	1	1	1	0.0461788	0.0031314	0.0766336	618685
ENSP00000272298	ENSG00000143933	CALM2	calmodulin 2 (phosphorylase kinase, delta) [Source:HGNC Symbol;Acc:HGNC:1445]	yes	0.3221476510067114	21	ENSP00000349467,ENSP00000451062,ENSP00000315299,ENSP00000387065,ENSP00000406112,ENSP00000272298,ENSP00000471225,ENSP00000291295,ENSP00000375785,ENSP00000486952,ENSP00000470308,ENSP00000450829,ENSP00000451646,ENSP00000411440,ENSP00000486402,ENSP00000472141,ENSP00000468877,ENSP00000403491,ENSP00000442853,ENSP00000450425,ENSP00000470502	6	8	135	1.07038e-20	0.000157101	0.00699383	357385096
ENSP00000272324	ENSG00000143954	REG3G	regenerating islet-derived 3 gamma [Source:HGNC Symbol;Acc:HGNC:29595]	yes	0.06285714285714286	2	ENSP00000377475,ENSP00000272324	1	1	15	0.0333222	0.00261622	0.0661527	1827915136
ENSP00000272520	ENSG00000144119	C1QL2	complement component 1, q subcomponent-like 2 [Source:HGNC Symbol;Acc:HGNC:24181]	yes	0.17073170731707318	3	ENSP00000480149,ENSP00000272520,ENSP00000298943	2	2	3	6.55927e-06	0.000157101	0.00699383	231945
ENSP00000274609	ENSG00000087116	ADAMTS2	ADAM metallopeptidase with thrombospondin type 1 motif, 2 [Source:HGNC Symbol;Acc:HGNC:218]	yes	0.15371024734982333	2	ENSP00000274609,ENSP00000251582	3	3	11	1.52176e-13	0.000157101	0.00699383	4.39232e+07
ENSP00000274853	ENSG00000146112	PPP1R18	protein phosphatase 1, regulatory subunit 18 [Source:HGNC Symbol;Acc:HGNC:29413]	yes	0.09951060358890701	18	ENSP00000387526,ENSP00000412456,ENSP00000404066,ENSP00000400990,ENSP00000399786,ENSP00000480270,ENSP00000382150,ENSP00000416648,ENSP00000413596,ENSP00000416491,ENSP00000373067,ENSP00000388790,ENSP00000411275,ENSP00000405234,ENSP00000400129,ENSP00000274853,ENSP00000383400,ENSP00000482578	4	4	9	9.73179e-16	0.000157101	0.00699383	1.25403e+06
ENSP00000276055	ENSG00000147119	CHST7	carbohydrate (N-acetylglucosamine 6-O) sulfotransferase 7 [Source:HGNC Symbol;Acc:HGNC:13817]	yes	0.026748971193415638	1	ENSP00000276055	1	1	3	0.000204512	0.000460765	0.0172042	55308924
ENSP00000278224	ENSG00000110619	CARS	cysteinyl-tRNA synthetase [Source:HGNC Symbol;Acc:HGNC:1493]	yes	0.09228650137741047	5	ENSP00000482336,ENSP00000432619,ENSP00000278224,ENSP00000369897,ENSP00000380300	6	6	16	3.2475e-15	0.000460765	0.0172042	1.00959e+07
ENSP00000278655	ENSG00000101333	PLCB4	phospholipase C, beta 4 [Source:HGNC Symbol;Acc:HGNC:9059]	yes	0.010212765957446808	5	ENSP00000367734,ENSP00000278655,ENSP00000367762,ENSP00000367754,ENSP00000390616	1	1	1	0.0013368	0.000460765	0.0172042	NA
ENSP00000281828	ENSG00000116120	FARSB	phenylalanyl-tRNA synthetase, beta subunit [Source:HGNC Symbol;Acc:HGNC:17800]	yes	0.01697792869269949	1	ENSP00000281828	1	1	1	0.0626958	0.00443372	0.102239	NA
ENSP00000284274	ENSG00000154124	OTULIN	OTU deubiquitinase with linear linkage specificity [Source:HGNC Symbol;Acc:HGNC:25118]	yes	0.11079545454545454	1	ENSP00000284274	2	2	2	0.00605283	0.00101792	0.0312306	763078
ENSP00000284669	ENSG00000239474	KLHL41	kelch-like family member 41 [Source:HGNC Symbol;Acc:HGNC:16905]	yes	0.0462046204620462	1	ENSP00000284669	3	3	6	0.000368092	0.000460765	0.0172042	1.2107e+06
ENSP00000286657	ENSG00000156140	ADAMTS3	ADAM metallopeptidase with thrombospondin type 1 motif, 3 [Source:HGNC Symbol;Acc:HGNC:219]	yes	0.038174273858921165	2	ENSP00000286657,ENSP00000480055	2	2	3	0.00158665	0.000460765	0.0172042	NA
ENSP00000286955	ENSG00000156413	FUT6	fucosyltransferase 6 (alpha (1,3) fucosyltransferase) [Source:HGNC Symbol;Acc:HGNC:4017]	yes	0.08635097493036212	14	ENSP00000432161,ENSP00000286955,ENSP00000466880,ENSP00000432954,ENSP00000252675,ENSP00000466016,ENSP00000436547,ENSP00000436413,ENSP00000305603,ENSP00000313398,ENSP00000431708,ENSP00000416443,ENSP00000468123,ENSP00000465804	2	2	7	0.00821696	0.00101792	0.0312306	4.64262e+06
ENSP00000287139	ENSG00000156574	NODAL	nodal growth differentiation factor [Source:HGNC Symbol;Acc:HGNC:7865]	yes	0.11527377521613832	1	ENSP00000287139	1	1	3	0.098196	0.00937682	0.189085	393289
ENSP00000289316	ENSG00000158373	HIST1H2BD	histone cluster 1, H2bd [Source:HGNC Symbol;Acc:HGNC:4747]	yes	0.19047619047619047	28	ENSP00000366618,ENSP00000380177,ENSP00000476136,ENSP00000366962,ENSP00000321744,ENSP00000446031,ENSP00000349430,ENSP00000475942,ENSP00000445633,ENSP00000479169,ENSP00000477527,ENSP00000482674,ENSP00000274764,ENSP00000289316,ENSP00000481622,ENSP00000477907,ENSP00000479284,ENSP00000348924,ENSP00000483903,ENSP00000380180,ENSP00000445831,ENSP00000486472,ENSP00000483237,ENSP00000358151,ENSP00000342886…	2	2	52	6.12086e-07	0.000157101	0.00699383	21986752
ENSP00000289473	ENSG00000158517	NCF1	neutrophil cytosolic factor 1 [Source:HGNC Symbol;Acc:HGNC:7660]	yes	0.20512820512820512	3	ENSP00000401935,ENSP00000392870,ENSP00000289473	5	5	9	7.64064e-23	0.000157101	0.00699383	3911512
ENSP00000290122	ENSG00000142789	CELA3A	chymotrypsin-like elastase family, member 3A [Source:HGNC Symbol;Acc:HGNC:15944]	yes	0.2	3	ENSP00000363795,ENSP00000338369,ENSP00000290122	3	3	26	1.39505e-18	0.000157101	0.00699383	8.39049e+07
ENSP00000290330	ENSG00000159210	SNF8	SNF8, ESCRT-II complex subunit [Source:HGNC Symbol;Acc:HGNC:17028]	yes	0.04669260700389105	2	ENSP00000290330,ENSP00000421380	1	1	1	0.00450995	0.000460765	0.0172042	NA
ENSP00000290332	ENSG00000159212	CLIC6	chloride intracellular channel 6 [Source:HGNC Symbol;Acc:HGNC:2065]	yes	0.0728862973760933	2	ENSP00000353959,ENSP00000290332	2	2	4	0.000536791	0.000460765	0.0172042	1122798
ENSP00000290354	ENSG00000159231	CBR3	carbonyl reductase 3 [Source:HGNC Symbol;Acc:HGNC:1549]	yes	0.09025270758122744	5	ENSP00000290354,ENSP00000290349,ENSP00000382143,ENSP00000434613,ENSP00000395132	1	2	11	0.0026777	0.000460765	0.0172042	NA
ENSP00000290858	ENSG00000067955	CBFB	core-binding factor, beta subunit [Source:HGNC Symbol;Acc:HGNC:1539]	yes	0.12637362637362637	4	ENSP00000415151,ENSP00000462273,ENSP00000290858,ENSP00000462148	2	2	2	0.000246097	0.000460765	0.0172042	2525991
ENSP00000294304	ENSG00000162337	LRP5	low density lipoprotein receptor-related protein 5 [Source:HGNC Symbol;Acc:HGNC:6697]	yes	0.06191950464396285	8	ENSP00000442472,ENSP00000445083,ENSP00000487008,ENSP00000486315,ENSP00000436652,ENSP00000486524,ENSP00000261349,ENSP00000294304	5	8	17	3.1431e-14	0.000157101	0.00699383	60586452
ENSP00000295463	ENSG00000163295	ALPI	alkaline phosphatase, intestinal [Source:HGNC Symbol;Acc:HGNC:437]	yes	0.13446969696969696	1	ENSP00000295463	5	5	15	8.04899e-22	0.000157101	0.00699383	3808156
ENSP00000295920	ENSG00000163655	GMPS	guanine monphosphate synthase [Source:HGNC Symbol;Acc:HGNC:4378]	yes	0.07575757575757576	2	ENSP00000419851,ENSP00000295920	3	3	5	1.76756e-11	0.000157101	0.00699383	1.24087e+07
ENSP00000295992	ENSG00000163710	PCOLCE2	procollagen C-endopeptidase enhancer 2 [Source:HGNC Symbol;Acc:HGNC:8739]	yes	0.3493975903614458	4	ENSP00000295992,ENSP00000419842,ENSP00000419643,ENSP00000418782	9	9	66	2.99633e-42	0.000157101	0.00699383	1.8428e+08
ENSP00000296530	ENSG00000164125	FAM198B	family with sequence similarity 198, member B [Source:HGNC Symbol;Acc:HGNC:25312]	yes	0.04816955684007707	7	ENSP00000296530,ENSP00000465491,ENSP00000465976,ENSP00000466811,ENSP00000377396,ENSP00000466873,ENSP00000468648	2	2	4	5.83215e-06	0.000157101	0.00699383	25397264
ENSP00000297770	ENSG00000165078	CPA6	carboxypeptidase A6 [Source:HGNC Symbol;Acc:HGNC:17245]	yes	0.06178489702517163	1	ENSP00000297770	1	1	1	0.0926331	0.00861692	0.176858	9700746
ENSP00000299353	ENSG00000270316	C10orf32-ASMT	C10orf32-ASMT readthrough (NMD candidate) [Source:HGNC Symbol;Acc:HGNC:49183]	yes	0.16037735849056603	3	ENSP00000342331,ENSP00000358899,ENSP00000299353	1	1	2	5.97709e-07	0.000157101	0.00699383	4702372
ENSP00000299608	ENSG00000166479	TMX3	thioredoxin-related transmembrane protein 3 [Source:HGNC Symbol;Acc:HGNC:24718]	yes	0.14757709251101322	7	ENSP00000455234,ENSP00000299608,ENSP00000402605,ENSP00000457262,ENSP00000456587,ENSP00000457074,ENSP00000458132	3	3	4	3.3922e-07	0.000157101	0.00699383	16993652
ENSP00000300231	ENSG00000166963	MAP1A	microtubule-associated protein 1A [Source:HGNC Symbol;Acc:HGNC:6835]	yes	0.01962183374955405	2	ENSP00000371462,ENSP00000300231	4	4	6	2.31116e-10	0.000460765	0.0172042	7.0968e+07
ENSP00000301258	ENSG00000167653	PSCA	prostate stem cell antigen [Source:HGNC Symbol;Acc:HGNC:9500]	yes	0.15789473684210525	1	ENSP00000301258	2	2	3	2.37127e-05	0.000157101	0.00699383	603068
ENSP00000301336	ENSG00000167705	RILP	Rab interacting lysosomal protein [Source:HGNC Symbol;Acc:HGNC:30266]	yes	0.057356608478802994	3	ENSP00000481849,ENSP00000301336,ENSP00000459101	2	2	6	0.000145507	0.000460765	0.0172042	2.95363e+07
ENSP00000301463	ENSG00000167778	SPRYD3	SPRY domain containing 3 [Source:HGNC Symbol;Acc:HGNC:25920]	yes	0.06108597285067873	2	ENSP00000301463,ENSP00000449452	2	2	8	0.0455188	0.00963463	0.193242	2.54318e+07
ENSP00000302079	ENSG00000171860	C3AR1	complement component 3a receptor 1 [Source:HGNC Symbol;Acc:HGNC:1319]	yes	0.08506224066390042	1	ENSP00000302079	2	2	3	0.00217792	0.000460765	0.0172042	4.36533e+06
ENSP00000302274	ENSG00000172247	C1QTNF4	C1q and tumor necrosis factor related protein 4 [Source:HGNC Symbol;Acc:HGNC:14346]	yes	0.0911854103343465	2	ENSP00000302274,ENSP00000434548	2	2	3	8.79636e-08	0.000157101	0.00699383	3.34791e+06
ENSP00000302413	ENSG00000169902	TPST1	tyrosylprotein sulfotransferase 1 [Source:HGNC Symbol;Acc:HGNC:12020]	yes	0.07567567567567568	1	ENSP00000302413	2	2	4	0.0385358	0.0031314	0.0766336	963308193
ENSP00000302629	ENSG00000198108	CHSY3	chondroitin sulfate synthase 3 [Source:HGNC Symbol;Acc:HGNC:24293]	yes	0.02947845804988662	2	ENSP00000254190,ENSP00000302629	2	2	2	2.01982e-05	0.000157101	0.00699383	971631424
ENSP00000302724	ENSG00000172410	INSL5	insulin-like 5 [Source:HGNC Symbol;Acc:HGNC:6088]	yes	0.0962962962962963	1	ENSP00000302724	1	1	8	4.31233e-06	0.000157101	0.00699383	7.92223e+06
ENSP00000303153	ENSG00000169436	COL22A1	collagen, type XXII, alpha 1 [Source:HGNC Symbol;Acc:HGNC:22989]	yes	0.03075030750307503	2	ENSP00000387655,ENSP00000303153	3	3	4	0.000113071	0.000460765	0.0172042	11004989
ENSP00000304364	ENSG00000171155	C1GALT1C1	C1GALT1-specific chaperone 1 [Source:HGNC Symbol;Acc:HGNC:24338]	yes	0.09748427672955975	2	ENSP00000304364,ENSP00000360363	2	2	7	1.72706e-12	0.000157101	0.00699383	NA
ENSP00000304802	ENSG00000168393	DTYMK	deoxythymidylate kinase (thymidylate kinase) [Source:HGNC Symbol;Acc:HGNC:3061]	yes	0.1320754716981132	4	ENSP00000304802,ENSP00000408939,ENSP00000383581,ENSP00000387379	3	3	5	0.0026292	0.00535184	0.119514	9.10714e+06
ENSP00000305010	ENSG00000172020	GAP43	growth associated protein 43 [Source:HGNC Symbol;Acc:HGNC:4140]	yes	0.19747899159663865	2	ENSP00000305010,ENSP00000377372	2	2	7	1.02409e-12	0.000157101	0.00699383	142003372
ENSP00000305288	ENSG00000169992	NLGN2	neuroligin 2 [Source:HGNC Symbol;Acc:HGNC:14290]	yes	0.026347305389221556	3	ENSP00000305288,ENSP00000461168,ENSP00000461092	2	2	2	1.94176e-05	0.000460765	0.0172042	7467317
ENSP00000305302	ENSG00000174358	SLC6A19	solute carrier family 6 (neutral amino acid transporter), member 19 [Source:HGNC Symbol;Acc:HGNC:27960]	yes	0.07413249211356467	1	ENSP00000305302	1	1	1	0.0104698	0.00101792	0.0312306	2860530
ENSP00000305919	ENSG00000169495	HTRA4	HtrA serine peptidase 4 [Source:HGNC Symbol;Acc:HGNC:26909]	yes	0.07142857142857142	1	ENSP00000305919	2	2	4	1.70572e-11	0.000157101	0.00699383	18947874
ENSP00000306817	ENSG00000171174	RBKS	ribokinase [Source:HGNC Symbol;Acc:HGNC:30325]	yes	0.037267080745341616	1	ENSP00000306817	1	1	4	0.000582612	0.000460765	0.0172042	9.08571e+06
ENSP00000307240	ENSG00000170484	KRT74	keratin 74, type II [Source:HGNC Symbol;Acc:HGNC:28929]	yes	0.08695652173913043	36	ENSP00000447402,ENSP00000449324,ENSP00000448207,ENSP00000446881,ENSP00000447566,ENSP00000252242,ENSP00000346269,ENSP00000441160,ENSP00000252252,ENSP00000267119,ENSP00000369317,ENSP00000329243,ENSP00000447040,ENSP00000330101,ENSP00000448220,ENSP00000252245,ENSP00000413479,ENSP00000447209,ENSP00000449081,ENSP00000328358,ENSP00000252250,ENSP00000307014,ENSP00000352479,ENSP00000342710,ENSP00000307240…	2	5	55	0.000768567	0.000460765	0.0172042	21354324
ENSP00000307297	ENSG00000169105	CHST14	carbohydrate (N-acetylgalactosamine 4-0) sulfotransferase 14 [Source:HGNC Symbol;Acc:HGNC:24464]	yes	0.17287234042553193	2	ENSP00000307297,ENSP00000453882	5	5	13	3.90119e-13	0.000157101	0.00699383	2.33698e+08
ENSP00000308067	ENSG00000165416	SUGT1	SGT1, suppressor of G2 allele of SKP1 (S. cerevisiae) [Source:HGNC Symbol;Acc:HGNC:16987]	yes	0.12012012012012012	2	ENSP00000308067,ENSP00000367208	4	4	8	2.1298e-07	0.000460765	0.0172042	5995836
ENSP00000309229	ENSG00000175449	RFESD	Rieske (Fe-S) domain containing [Source:HGNC Symbol;Acc:HGNC:29587]	yes	0.16560509554140126	5	ENSP00000422520,ENSP00000369341,ENSP00000309229,ENSP00000425632,ENSP00000413592	2	2	6	1.2037e-06	0.000460765	0.0172042	3.85967e+07
ENSP00000309270	ENSG00000175264	CHST1	carbohydrate (keratan sulfate Gal-6) sulfotransferase 1 [Source:HGNC Symbol;Acc:HGNC:1969]	yes	0.1922141119221411	1	ENSP00000309270	4	4	13	1.52586e-10	0.000157101	0.00699383	46341784
ENSP00000309582	ENSG00000165219	GAPVD1	GTPase activating protein and VPS9 domains 1 [Source:HGNC Symbol;Acc:HGNC:23375]	yes	0.031966643502432245	11	ENSP00000377646,ENSP00000377665,ENSP00000419063,ENSP00000377645,ENSP00000377664,ENSP00000309582,ENSP00000419767,ENSP00000297933,ENSP00000418747,ENSP00000419799,ENSP00000418969	4	4	10	9.43309e-10	0.000460765	0.0172042	9.16215e+06
ENSP00000310189	ENSG00000173542	MOB1B	MOB kinase activator 1B [Source:HGNC Symbol;Acc:HGNC:29801]	yes	0.05092592592592592	3	ENSP00000310189,ENSP00000379366,ENSP00000379364	1	1	11	0.00356245	0.000460765	0.0172042	4.16615e+08
ENSP00000310219	ENSG00000173110	HSPA6	heat shock 70kDa protein 6 (HSP70B') [Source:HGNC Symbol;Acc:HGNC:5239]	yes	0.104199066874028	39	ENSP00000372880,ENSP00000393087,ENSP00000403530,ENSP00000437125,ENSP00000406359,ENSP00000404372,ENSP00000227378,ENSP00000436183,ENSP00000436762,ENSP00000408347,ENSP00000396486,ENSP00000433584,ENSP00000375399,ENSP00000364802,ENSP00000375391,ENSP00000387691,ENSP00000364805,ENSP00000372881,ENSP00000442789,ENSP00000382915,ENSP00000434415,ENSP00000310219,ENSP00000247207,ENSP00000408907,ENSP00000364801…	2	6	77	3.85902e-08	0.000157101	0.00699383	6.97489e+07
ENSP00000310632	ENSG00000197376	OR8S1	olfactory receptor, family 8, subfamily S, member 1 [Source:HGNC Symbol;Acc:HGNC:19628]	yes	0.13649025069637882	1	ENSP00000310632	1	1	1	0.0653691	0.00443372	0.102239	3399281
ENSP00000311027	ENSG00000173418	NAA20	N(alpha)-acetyltransferase 20, NatB catalytic subunit [Source:HGNC Symbol;Acc:HGNC:15908]	yes	0.08108108108108109	2	ENSP00000311027,ENSP00000335636	1	1	2	0.0502346	0.0031314	0.0766336	12742098
ENSP00000312021	ENSG00000174951	FUT1	fucosyltransferase 1 (galactoside 2-alpha-L-fucosyltransferase, H blood group) [Source:HGNC Symbol;Acc:HGNC:4012]	yes	0.06575342465753424	1	ENSP00000312021	2	2	5	6.51033e-07	0.000460765	0.0172042	4.48965e+07
ENSP00000313084	ENSG00000164318	EGFLAM	EGF-like, fibronectin type III and laminin G domains [Source:HGNC Symbol;Acc:HGNC:26810]	yes	0.05252725470763132	8	ENSP00000337607,ENSP00000346964,ENSP00000425579,ENSP00000423228,ENSP00000380393,ENSP00000380385,ENSP00000313084,ENSP00000427228	3	3	4	2.41324e-05	0.000460765	0.0172042	7702023
ENSP00000314407	ENSG00000178538	CA8	carbonic anhydrase VIII [Source:HGNC Symbol;Acc:HGNC:1382]	yes	0.041379310344827586	1	ENSP00000314407	1	1	1	0.00262832	0.000460765	0.0172042	NA
ENSP00000316173	ENSG00000176597	B3GNT5	UDP-GlcNAc:betaGal beta-1,3-N-acetylglucosaminyltransferase 5 [Source:HGNC Symbol;Acc:HGNC:15684]	yes	0.06613756613756613	3	ENSP00000316173,ENSP00000417868,ENSP00000420778	2	2	5	1.8605e-07	0.000157101	0.00699383	1.54324e+06
ENSP00000317404	ENSG00000180767	CHST13	carbohydrate (chondroitin 4) sulfotransferase 13 [Source:HGNC Symbol;Acc:HGNC:21755]	yes	0.12609970674486803	2	ENSP00000478416,ENSP00000317404	4	4	10	2.6731e-10	0.000157101	0.00699383	4.42416e+08
ENSP00000318066	ENSG00000001561	ENPP4	ectonucleotide pyrophosphatase/phosphodiesterase 4 (putative) [Source:HGNC Symbol;Acc:HGNC:3359]	yes	0.026490066225165563	1	ENSP00000318066	2	2	4	0.000184664	0.000755242	0.0250629	2892049
ENSP00000319140	ENSG00000243130	PSG11	pregnancy specific beta-1-glycoprotein 11 [Source:HGNC Symbol;Acc:HGNC:9516]	yes	0.3194029850746269	19	ENSP00000332984,ENSP00000472717,ENSP00000480223,ENSP00000319140,ENSP00000472372,ENSP00000385706,ENSP00000470690,ENSP00000478484,ENSP00000385427,ENSP00000305005,ENSP00000244293,ENSP00000332215,ENSP00000468936,ENSP00000385736,ENSP00000469292,ENSP00000304913,ENSP00000471453,ENSP00000386090,ENSP00000385869	3	6	25	3.66486e-14	0.000157101	0.00699383	296704896
ENSP00000320828	ENSG00000177106	EPS8L2	EPS8-like 2 [Source:HGNC Symbol;Acc:HGNC:21296]	yes	0.08951048951048951	10	ENSP00000480201,ENSP00000432923,ENSP00000435585,ENSP00000436035,ENSP00000435128,ENSP00000480704,ENSP00000436230,ENSP00000433223,ENSP00000432765,ENSP00000320828	4	4	4	2.98519e-06	0.000460765	0.0172042	115266991
ENSP00000321320	ENSG00000235173	HGH1	HGH1 homolog (S. cerevisiae) [Source:HGNC Symbol;Acc:HGNC:24161]	yes	0.03076923076923077	1	ENSP00000321320	1	1	1	0.00622634	0.00101792	0.0312306	NA
ENSP00000322016	ENSG00000179950	PUF60	poly-U binding splicing factor 60KDa [Source:HGNC Symbol;Acc:HGNC:17042]	yes	0.07615230460921844	12	ENSP00000434863,ENSP00000478209,ENSP00000395417,ENSP00000322036,ENSP00000432610,ENSP00000484860,ENSP00000402953,ENSP00000431960,ENSP00000436131,ENSP00000322016,ENSP00000478495,ENSP00000434359	3	3	6	1.10661e-08	0.000157101	0.00699383	7.45455e+06
ENSP00000322422	ENSG00000179057	IGSF22	immunoglobulin superfamily, member 22 [Source:HGNC Symbol;Acc:HGNC:26750]	yes	0.031007751937984496	2	ENSP00000421191,ENSP00000322422	2	2	2	0.00406837	0.000755242	0.0250629	9310851
ENSP00000324483	ENSG00000170180	GYPA	glycophorin A (MNS blood group) [Source:HGNC Symbol;Acc:HGNC:4702]	yes	0.36752136752136755	8	ENSP00000421243,ENSP00000445398,ENSP00000324483,ENSP00000425193,ENSP00000425549,ENSP00000354003,ENSP00000478329,ENSP00000426130	2	2	4	0.00875922	0.00261622	0.0661527	79312369
ENSP00000327431	ENSG00000213934	HBG1	hemoglobin, gamma A [Source:HGNC Symbol;Acc:HGNC:4831]	yes	0.08843537414965986	4	ENSP00000327431,ENSP00000369609,ENSP00000338082,ENSP00000479637	1	1	11	0.000164653	0.000460765	0.0172042	4.94428e+07
ENSP00000328070	ENSG00000182327	GLTPD2	glycolipid transfer protein domain containing 2 [Source:HGNC Symbol;Acc:HGNC:33756]	yes	0.08934707903780069	1	ENSP00000328070	2	2	17	6.75661e-10	0.000157101	0.00699383	1.02358e+07
ENSP00000328287	ENSG00000164068	RNF123	ring finger protein 123 [Source:HGNC Symbol;Acc:HGNC:21148]	yes	0.0700152207001522	4	ENSP00000394369,ENSP00000328287,ENSP00000416156,ENSP00000392443	6	6	43	6.98914e-30	0.000157101	0.00699383	5280796
ENSP00000328484	ENSG00000276368	HIST1H2AJ	histone cluster 1, H2aj [Source:HGNC Symbol;Acc:HGNC:4727]	yes	0.3046875	29	ENSP00000341094,ENSP00000222690,ENSP00000406901,ENSP00000475814,ENSP00000308405,ENSP00000473534,ENSP00000355656,ENSP00000321389,ENSP00000358155,ENSP00000352119,ENSP00000483842,ENSP00000332194,ENSP00000482431,ENSP00000370516,ENSP00000366679,ENSP00000352627,ENSP00000434024,ENSP00000373730,ENSP00000367022,ENSP00000297012,ENSP00000332790,ENSP00000296417,ENSP00000440902,ENSP00000303373,ENSP00000482538…	2	3	21	0.0125259	0.00717386	0.152337	2.72656e+07
ENSP00000328641	ENSG00000185515	BRCC3	BRCA1/BRCA2-containing complex, subunit 3 [Source:HGNC Symbol;Acc:HGNC:24185]	yes	0.13745704467353953	8	ENSP00000413170,ENSP00000344103,ENSP00000381998,ENSP00000482836,ENSP00000358474,ENSP00000486287,ENSP00000358471,ENSP00000328641	2	2	2	0.0123983	0.00101792	0.0312306	187406816
ENSP00000329890	ENSG00000164816	DEFA5	defensin, alpha 5, Paneth cell-specific [Source:HGNC Symbol;Acc:HGNC:2764]	yes	0.1276595744680851	1	ENSP00000329890	1	1	4	0.000270252	0.000460765	0.0172042	63440030
ENSP00000330054	ENSG00000156508	EEF1A1	eukaryotic translation elongation factor 1 alpha 1 [Source:HGNC Symbol;Acc:HGNC:3189]	yes	0.329004329004329	9	ENSP00000479055,ENSP00000339063,ENSP00000392366,ENSP00000348651,ENSP00000479609,ENSP00000298049,ENSP00000339053,ENSP00000330054,ENSP00000217182	5	10	26	1.41785e-21	0.000157101	0.00699383	1147050
ENSP00000330262	ENSG00000166448	TMEM130	transmembrane protein 130 [Source:HGNC Symbol;Acc:HGNC:25429]	yes	0.03115264797507788	4	ENSP00000390200,ENSP00000413163,ENSP00000341256,ENSP00000330262	1	1	1	0.0127541	0.00101792	0.0312306	1514092
ENSP00000330469	ENSG00000182253	SYNM	synemin, intermediate filament protein [Source:HGNC Symbol;Acc:HGNC:24466]	yes	0.05014749262536873	3	ENSP00000330469,ENSP00000336775,ENSP00000472953	2	2	3	0.00551286	0.00101792	0.0312306	501649
ENSP00000330552	ENSG00000099715	PCDH11Y	protocadherin 11 Y-linked [Source:HGNC Symbol;Acc:HGNC:15813]	yes	0.03471552555448409	13	ENSP00000362186,ENSP00000383306,ENSP00000355105,ENSP00000384758,ENSP00000362180,ENSP00000482115,ENSP00000362189,ENSP00000215473,ENSP00000330552,ENSP00000355419,ENSP00000423762,ENSP00000378746,ENSP00000478548	2	2	4	0.00011323	0.000157101	0.00699383	21978476
ENSP00000331487	ENSG00000182446	NPLOC4	nuclear protein localization 4 homolog (S. cerevisiae) [Source:HGNC Symbol;Acc:HGNC:18261]	yes	0.03618421052631579	2	ENSP00000331487,ENSP00000363879	2	2	2	0.000233768	0.000460765	0.0172042	596151
ENSP00000331851	ENSG00000185164	NOMO2	NODAL modulator 2 [Source:HGNC Symbol;Acc:HGNC:22652]	yes	0.25941080196399346	21	ENSP00000480539,ENSP00000287667,ENSP00000479933,ENSP00000478653,ENSP00000458821,ENSP00000477774,ENSP00000478494,ENSP00000482008,ENSP00000263012,ENSP00000439970,ENSP00000370883,ENSP00000483234,ENSP00000331851,ENSP00000382274,ENSP00000455456,ENSP00000458267,ENSP00000483827,ENSP00000477502,ENSP00000483204,ENSP00000457351,ENSP00000484978	22	22	178	3.97026e-88	0.000157101	0.00699383	619038784
ENSP00000332371	ENSG00000114270	COL7A1	collagen, type VII, alpha 1 [Source:HGNC Symbol;Acc:HGNC:2214]	yes	0.01188858695652174	1	ENSP00000332371	3	3	10	2.73239e-10	0.000157101	0.00699383	1.75398e+08
ENSP00000332790	ENSG00000184270	HIST2H2AB	histone cluster 2, H2ab [Source:HGNC Symbol;Acc:HGNC:20508]	yes	0.3	28	ENSP00000341094,ENSP00000222690,ENSP00000406901,ENSP00000364310,ENSP00000308405,ENSP00000351589,ENSP00000355656,ENSP00000321389,ENSP00000358155,ENSP00000352119,ENSP00000483842,ENSP00000332194,ENSP00000482431,ENSP00000370516,ENSP00000473534,ENSP00000366679,ENSP00000352627,ENSP00000434024,ENSP00000373730,ENSP00000367022,ENSP00000297012,ENSP00000332790,ENSP00000296417,ENSP00000303373,ENSP00000482538…	1	2	6	0.000151915	0.000157101	0.00699383	4624240
ENSP00000332823	ENSG00000184162	NR2C2AP	nuclear receptor 2C2-associated protein [Source:HGNC Symbol;Acc:HGNC:30763]	yes	0.08633093525179857	2	ENSP00000332823,ENSP00000402756	1	1	1	0.00533232	0.000755242	0.0250629	180824592
ENSP00000333737	ENSG00000240654	C1QTNF9	C1q and tumor necrosis factor related protein 9 [Source:HGNC Symbol;Acc:HGNC:28732]	yes	0.057057057057057055	2	ENSP00000371503,ENSP00000333737	1	1	2	7.63839e-05	0.000157101	0.00699383	2579642
ENSP00000333779	ENSG00000185862	EVI2B	ecotropic viral integration site 2B [Source:HGNC Symbol;Acc:HGNC:3500]	yes	0.024553571428571428	2	ENSP00000333779,ENSP00000462682	1	1	1	0.00838142	0.00101792	0.0312306	1724248
ENSP00000335623	ENSG00000186806	VSIG10L	V-set and immunoglobulin domain containing 10 like [Source:HGNC Symbol;Acc:HGNC:27111]	yes	0.0265282583621684	1	ENSP00000335623	2	2	5	1.60086e-05	0.000460765	0.0172042	1.28818e+07
ENSP00000336666	ENSG00000106367	AP1S1	adaptor-related protein complex 1, sigma 1 subunit [Source:HGNC Symbol;Acc:HGNC:559]	yes	0.10126582278481013	3	ENSP00000410780,ENSP00000399902,ENSP00000336666	1	1	1	0.00104321	0.000460765	0.0172042	838168
ENSP00000336914	ENSG00000127084	FGD3	FYVE, RhoGEF and PH domain containing 3 [Source:HGNC Symbol;Acc:HGNC:16027]	yes	0.05103448275862069	4	ENSP00000364631,ENSP00000432310,ENSP00000413833,ENSP00000336914	3	3	7	0.000651978	0.00101792	0.0312306	4649442
ENSP00000336998	ENSG00000079931	MOXD1	monooxygenase, DBH-like 1 [Source:HGNC Symbol;Acc:HGNC:21063]	yes	0.04220183486238532	2	ENSP00000336998,ENSP00000356940	1	1	3	0.0146938	0.00101792	0.0312306	56819484
ENSP00000337985	ENSG00000168077	SCARA3	scavenger receptor class A, member 3 [Source:HGNC Symbol;Acc:HGNC:19000]	yes	0.02145922746781116	2	ENSP00000301904,ENSP00000337985	1	1	5	0.0642102	0.00443372	0.102239	49818188
ENSP00000338346	ENSG00000162512	SDC3	syndecan 3 [Source:HGNC Symbol;Acc:HGNC:10660]	yes	0.057291666666666664	2	ENSP00000338346,ENSP00000344468	1	1	1	0.0302378	0.00261622	0.0661527	NA
ENSP00000339067	ENSG00000174721	FGFBP3	fibroblast growth factor binding protein 3 [Source:HGNC Symbol;Acc:HGNC:23428]	yes	0.13178294573643412	1	ENSP00000339067	1	1	2	6.57525e-09	0.000157101	0.00699383	NA
ENSP00000339666	ENSG00000091106	NLRC4	NLR family, CARD domain containing 4 [Source:HGNC Symbol;Acc:HGNC:16412]	yes	0.033426183844011144	4	ENSP00000385428,ENSP00000339666,ENSP00000385090,ENSP00000354159	1	1	1	0.0169241	0.00101792	0.0312306	4888556
ENSP00000339958	ENSG00000010322	NISCH	nischarin [Source:HGNC Symbol;Acc:HGNC:18006]	yes	0.0199468085106383	4	ENSP00000418232,ENSP00000417812,ENSP00000339958,ENSP00000392484	2	2	3	0.0670106	0.00912014	0.185002	5.22715e+06
ENSP00000340934	ENSG00000142453	CARM1	coactivator-associated arginine methyltransferase 1 [Source:HGNC Symbol;Acc:HGNC:23393]	yes	0.07008547008547009	5	ENSP00000467746,ENSP00000465417,ENSP00000340934,ENSP00000467420,ENSP00000325690	4	4	11	7.88874e-09	0.000157101	0.00699383	4702331
ENSP00000341206	ENSG00000140835	CHST4	carbohydrate (N-acetylglucosamine 6-O) sulfotransferase 4 [Source:HGNC Symbol;Acc:HGNC:1972]	yes	0.04922279792746114	2	ENSP00000341206,ENSP00000441204	1	1	1	0.000409274	0.000460765	0.0172042	36895988
ENSP00000341214	ENSG00000187475	HIST1H1T	histone cluster 1, H1t [Source:HGNC Symbol;Acc:HGNC:4720]	yes	0.05314009661835749	5	ENSP00000339566,ENSP00000244573,ENSP00000244534,ENSP00000341214,ENSP00000307705	1	1	1	0.00843342	0.00101792	0.0312306	3789282
ENSP00000341289	ENSG00000188229	TUBB4B	tubulin, beta 4B class IVb [Source:HGNC Symbol;Acc:HGNC:20771]	yes	0.21797752808988763	52	ENSP00000403868,ENSP00000320295,ENSP00000392914,ENSP00000391515,ENSP00000401546,ENSP00000383378,ENSP00000410829,ENSP00000471503,ENSP00000416480,ENSP00000472481,ENSP00000394124,ENSP00000399155,ENSP00000469660,ENSP00000451560,ENSP00000469936,ENSP00000264071,ENSP00000403213,ENSP00000379668,ENSP00000451617,ENSP00000443590,ENSP00000259818,ENSP00000469560,ENSP00000365578,ENSP00000470627,ENSP00000413589…	4	8	34	1.9641e-18	0.000157101	0.00699383	229273593
ENSP00000341350	ENSG00000136099	PCDH8	protocadherin 8 [Source:HGNC Symbol;Acc:HGNC:8660]	yes	0.03597122302158273	2	ENSP00000341350,ENSP00000367177	2	2	2	1.24928e-06	0.000157101	0.00699383	NA
ENSP00000341490	ENSG00000100593	ISM2	isthmin 2 [Source:HGNC Symbol;Acc:HGNC:23176]	yes	0.0840630472854641	3	ENSP00000420452,ENSP00000450791,ENSP00000341490	4	4	5	1.15887e-14	0.000157101	0.00699383	52475101
ENSP00000341500	ENSG00000066032	CTNNA2	catenin (cadherin-associated protein), alpha 2 [Source:HGNC Symbol;Acc:HGNC:2510]	yes	0.053082191780821915	12	ENSP00000427821,ENSP00000419295,ENSP00000418191,ENSP00000444675,ENSP00000486200,ENSP00000438476,ENSP00000486160,ENSP00000384638,ENSP00000355398,ENSP00000441705,ENSP00000304669,ENSP00000341500	2	2	2	7.3289e-05	0.000157101	0.00699383	181684
ENSP00000341684	ENSG00000149548	CCDC15	coiled-coil domain containing 15 [Source:HGNC Symbol;Acc:HGNC:25798]	yes	0.07570977917981073	2	ENSP00000435403,ENSP00000341684	2	2	3	0.0710976	0.00937682	0.189085	3320333
ENSP00000343190	ENSG00000138621	PPCDC	phosphopantothenoylcysteine decarboxylase [Source:HGNC Symbol;Acc:HGNC:28107]	yes	0.25980392156862747	6	ENSP00000456665,ENSP00000457490,ENSP00000343190,ENSP00000457446,ENSP00000456353,ENSP00000455691	3	3	5	1.13152e-12	0.000157101	0.00699383	1.30856e+07
ENSP00000343439	ENSG00000106268	NUDT1	nudix (nucleoside diphosphate linked moiety X)-type motif 1 [Source:HGNC Symbol;Acc:HGNC:8048]	yes	0.08333333333333333	6	ENSP00000339503,ENSP00000349148,ENSP00000380239,ENSP00000380241,ENSP00000343439,ENSP00000380242	1	1	4	1.0588e-05	0.000157101	0.00699383	1.89425e+06
ENSP00000343634	ENSG00000161270	NPHS1	nephrosis 1, congenital, Finnish type (nephrin) [Source:HGNC Symbol;Acc:HGNC:7908]	yes	0.019983347210657785	2	ENSP00000368190,ENSP00000343634	2	2	2	5.83923e-06	0.000157101	0.00699383	4114856
ENSP00000344223	ENSG00000140943	MBTPS1	membrane-bound transcription factor peptidase, site 1 [Source:HGNC Symbol;Acc:HGNC:15456]	yes	0.06178707224334601	2	ENSP00000344223,ENSP00000457954	4	4	6	8.15133e-12	0.000157101	0.00699383	952356
ENSP00000344822	ENSG00000189171	S100A13	S100 calcium binding protein A13 [Source:HGNC Symbol;Acc:HGNC:10490]	yes	0.20408163265306123	5	ENSP00000376399,ENSP00000392767,ENSP00000357688,ENSP00000344822,ENSP00000376398	2	2	7	0.000118043	0.00101792	0.0312306	8112365
ENSP00000345719	ENSG00000136827	TOR1A	torsin family 1, member A (torsin A) [Source:HGNC Symbol;Acc:HGNC:3098]	yes	0.17771084337349397	1	ENSP00000345719	5	5	16	1.53814e-14	0.000157101	0.00699383	9519384
ENSP00000346046	ENSG00000182774	RPS17	ribosomal protein S17 [Source:HGNC Symbol;Acc:HGNC:10397]	yes	0.24444444444444444	5	ENSP00000346046,ENSP00000453910,ENSP00000452889,ENSP00000483755,ENSP00000453894	2	2	3	3.96854e-05	0.000460765	0.0172042	99727732
ENSP00000346130	ENSG00000198168	SVIP	small VCP/p97-interacting protein [Source:HGNC Symbol;Acc:HGNC:25238]	yes	0.14285714285714285	1	ENSP00000346130	1	1	1	0.00388585	0.000460765	0.0172042	8033384
ENSP00000346402	ENSG00000023191	RNH1	ribonuclease/angiogenin inhibitor 1 [Source:HGNC Symbol;Acc:HGNC:10074]	yes	0.42733188720173537	20	ENSP00000346402,ENSP00000431201,ENSP00000479966,ENSP00000435748,ENSP00000380729,ENSP00000478664,ENSP00000416589,ENSP00000432170,ENSP00000348515,ENSP00000479004,ENSP00000435057,ENSP00000380739,ENSP00000435594,ENSP00000434947,ENSP00000433999,ENSP00000380738,ENSP00000433033,ENSP00000480036,ENSP00000435798,ENSP00000484572	12	12	86	4.36113e-42	0.000157101	0.00699383	2.61462e+08
ENSP00000346802	ENSG00000197479	PCDHB11	protocadherin beta 11 [Source:HGNC Symbol;Acc:HGNC:8682]	yes	0.06524466750313676	22	ENSP00000239444,ENSP00000485303,ENSP00000438466,ENSP00000345491,ENSP00000231136,ENSP00000194155,ENSP00000478606,ENSP00000477314,ENSP00000485034,ENSP00000231134,ENSP00000231137,ENSP00000485464,ENSP00000239450,ENSP00000231173,ENSP00000485553,ENSP00000231130,ENSP00000194152,ENSP00000485055,ENSP00000239449,ENSP00000444518,ENSP00000346802,ENSP00000239446	2	3	3	0.0199988	0.00261622	0.0661527	2790668893
ENSP00000346931	ENSG00000185127	C6orf120	chromosome 6 open reading frame 120 [Source:HGNC Symbol;Acc:HGNC:21247]	yes	0.3403141361256545	1	ENSP00000346931	2	2	9	2.18457e-11	0.000157101	0.00699383	6.37707e+06
ENSP00000347484	ENSG00000187720	THSD4	thrombospondin, type I, domain containing 4 [Source:HGNC Symbol;Acc:HGNC:25835]	yes	0.011787819253438114	1	ENSP00000347484	1	1	1	0.00306941	0.000460765	0.0172042	NA
ENSP00000347532	ENSG00000187164	KIAA1598	KIAA1598 [Source:HGNC Symbol;Acc:HGNC:29319]	yes	0.11251980982567353	5	ENSP00000347532,ENSP00000376636,ENSP00000480109,ENSP00000260777,ENSP00000376635	4	4	7	1.3308e-13	0.000157101	0.00699383	3422577
ENSP00000348050	ENSG00000182534	MXRA7	matrix-remodelling associated 7 [Source:HGNC Symbol;Acc:HGNC:7541]	yes	0.22058823529411764	3	ENSP00000364176,ENSP00000348050,ENSP00000391466	1	2	5	0.000643331	0.000460765	0.0172042	8.74985e+06
ENSP00000348577	ENSG00000100401	RANGAP1	Ran GTPase activating protein 1 [Source:HGNC Symbol;Acc:HGNC:9854]	yes	0.13458262350936967	6	ENSP00000408743,ENSP00000385866,ENSP00000394787,ENSP00000393407,ENSP00000348577,ENSP00000401470	6	6	10	3.58908e-15	0.000157101	0.00699383	1.04368e+08
ENSP00000348769	ENSG00000177479	ARIH2	ariadne RBR E3 ubiquitin protein ligase 2 [Source:HGNC Symbol;Acc:HGNC:690]	yes	0.032454361054766734	2	ENSP00000348769,ENSP00000403222	1	1	1	0.00219552	0.000460765	0.0172042	131787
ENSP00000348812	ENSG00000153707	PTPRD	protein tyrosine phosphatase, receptor type, D [Source:HGNC Symbol;Acc:HGNC:9668]	yes	0.20868200836820083	22	ENSP00000353030,ENSP00000269907,ENSP00000417093,ENSP00000440515,ENSP00000413306,ENSP00000327313,ENSP00000380731,ENSP00000370593,ENSP00000465443,ENSP00000380735,ENSP00000417890,ENSP00000349932,ENSP00000438164,ENSP00000380741,ENSP00000467398,ENSP00000398822,ENSP00000262963,ENSP00000483557,ENSP00000347373,ENSP00000417661,ENSP00000467537,ENSP00000348812	22	24	145	4.58417e-85	0.000157101	0.00699383	1647970176
ENSP00000349456	ENSG00000121940	CLCC1	chloride channel CLIC-like 1 [Source:HGNC Symbol;Acc:HGNC:29675]	yes	0.0544464609800363	7	ENSP00000337243,ENSP00000358987,ENSP00000306552,ENSP00000358985,ENSP00000358986,ENSP00000349456,ENSP00000358993	3	3	4	0.000987214	0.00101792	0.0312306	26323
ENSP00000350075	ENSG00000242498	ARPIN	actin-related protein 2/3 complex inhibitor [Source:HGNC Symbol;Acc:HGNC:28782]	yes	0.05309734513274336	2	ENSP00000381377,ENSP00000350075	1	1	1	0.0376133	0.00261622	0.0661527	550322
ENSP00000350607	ENSG00000230453	ANKRD18B	ankyrin repeat domain 18B [Source:HGNC Symbol;Acc:HGNC:23644]	yes	0.0199501246882793	2	ENSP00000290943,ENSP00000350607	1	1	4	0.0799803	0.00717386	0.152337	5166748
ENSP00000350630	ENSG00000095587	TLL2	tolloid-like 2 [Source:HGNC Symbol;Acc:HGNC:11844]	yes	0.042364532019704436	9	ENSP00000428332,ENSP00000428665,ENSP00000305714,ENSP00000430406,ENSP00000426082,ENSP00000306121,ENSP00000061240,ENSP00000422937,ENSP00000350630	1	4	57	0.00134511	0.000460765	0.0172042	6.33375e+06
ENSP00000352163	ENSG00000197353	LYPD2	LY6/PLAUR domain containing 2 [Source:HGNC Symbol;Acc:HGNC:25215]	yes	0.112	1	ENSP00000352163	1	1	3	6.03638e-05	0.000157101	0.00699383	1.69895e+06
ENSP00000352626	ENSG00000196171	OR6K2	olfactory receptor, family 6, subfamily K, member 2 [Source:HGNC Symbol;Acc:HGNC:15029]	yes	0.08024691358024691	1	ENSP00000352626	1	1	2	0.0327213	0.00261622	0.0661527	23150846
ENSP00000353044	ENSG00000198128	OR2L3	olfactory receptor, family 2, subfamily L, member 3 [Source:HGNC Symbol;Acc:HGNC:15009]	yes	0.0641025641025641	1	ENSP00000353044	1	1	9	0.0556277	0.00338313	0.0815232	2.02022e+08
ENSP00000353142	ENSG00000197093	GAL3ST4	galactose-3-O-sulfotransferase 4 [Source:HGNC Symbol;Acc:HGNC:24145]	yes	0.09465020576131687	2	ENSP00000353142,ENSP00000400451	3	3	9	4.04058e-16	0.000157101	0.00699383	7.7773e+06
ENSP00000353472	ENSG00000204632	HLA-G	major histocompatibility complex, class I, G [Source:HGNC Symbol;Acc:HGNC:4964]	yes	0.029585798816568046	24	ENSP00000366024,ENSP00000398200,ENSP00000482111,ENSP00000479303,ENSP00000388176,ENSP00000405238,ENSP00000383506,ENSP00000383521,ENSP00000392347,ENSP00000389522,ENSP00000408773,ENSP00000447762,ENSP00000448085,ENSP00000387624,ENSP00000409132,ENSP00000484084,ENSP00000412927,ENSP00000353472,ENSP00000449291,ENSP00000448363,ENSP00000449903,ENSP00000447780,ENSP00000397331,ENSP00000373116	1	1	4	0.00880654	0.00101792	0.0312306	8344550
ENSP00000353910	ENSG00000033170	FUT8	fucosyltransferase 8 (alpha (1,6) fucosyltransferase) [Source:HGNC Symbol;Acc:HGNC:4019]	yes	0.04521739130434783	5	ENSP00000353910,ENSP00000452433,ENSP00000378087,ENSP00000345865,ENSP00000351057	2	2	2	4.91358e-08	0.000157101	0.00699383	44776484
ENSP00000354543	ENSG00000196428	TSC22D2	TSC22 domain family, member 2 [Source:HGNC Symbol;Acc:HGNC:29095]	yes	0.015384615384615385	1	ENSP00000354543	1	1	1	0.00219552	0.000460765	0.0172042	6177171
ENSP00000354722	ENSG00000198692	EIF1AY	eukaryotic translation initiation factor 1A, Y-linked [Source:HGNC Symbol;Acc:HGNC:3252]	yes	0.1597222222222222	4	ENSP00000368912,ENSP00000354722,ENSP00000368927,ENSP00000372222	2	2	3	0.00311049	0.00101792	0.0312306	NA
ENSP00000355049	ENSG00000085552	IGSF9	immunoglobulin superfamily, member 9 [Source:HGNC Symbol;Acc:HGNC:18132]	yes	0.007738607050730868	2	ENSP00000357073,ENSP00000355049	1	1	1	0.0295114	0.00261622	0.0661527	NA
ENSP00000355243	ENSG00000169851	PCDH7	protocadherin 7 [Source:HGNC Symbol;Acc:HGNC:8659]	yes	0.11880261927034612	4	ENSP00000484874,ENSP00000355243,ENSP00000427066,ENSP00000441802	9	9	47	3.00561e-43	0.000157101	0.00699383	1.6331e+09
ENSP00000355388	ENSG00000196199	MPHOSPH8	M-phase phosphoprotein 8 [Source:HGNC Symbol;Acc:HGNC:29810]	yes	0.026744186046511628	1	ENSP00000355388	1	1	5	0.0536628	0.0031314	0.0766336	937279
ENSP00000355777	ENSG00000182827	ACBD3	acyl-CoA binding domain containing 3 [Source:HGNC Symbol;Acc:HGNC:15453]	yes	0.043560606060606064	1	ENSP00000355777	2	2	7	0.000850102	0.000460765	0.0172042	1.91203e+06
ENSP00000355996	ENSG00000123689	G0S2	G0/G1 switch 2 [Source:HGNC Symbol;Acc:HGNC:30229]	yes	0.14563106796116504	1	ENSP00000355996	1	1	1	0.0345565	0.00261622	0.0661527	NA
ENSP00000356599	ENSG00000186283	TOR3A	torsin family 3, member A [Source:HGNC Symbol;Acc:HGNC:11997]	yes	0.05289672544080604	2	ENSP00000335351,ENSP00000356599	2	2	2	0.00111488	0.00101792	0.0312306	5025597
ENSP00000356634	ENSG00000116183	PAPPA2	pappalysin 2 [Source:HGNC Symbol;Acc:HGNC:14615]	yes	0.06030150753768844	2	ENSP00000356634,ENSP00000356633	6	6	15	5.91359e-23	0.000157101	0.00699383	4.82429e+07
ENSP00000357008	ENSG00000158764	ITLN2	intelectin 2 [Source:HGNC Symbol;Acc:HGNC:20599]	yes	0.20307692307692307	2	ENSP00000323587,ENSP00000357008	2	3	8	0.000575463	0.000460765	0.0172042	147083
ENSP00000357057	ENSG00000143318	CASQ1	calsequestrin 1 (fast-twitch, skeletal muscle) [Source:HGNC Symbol;Acc:HGNC:1512]	yes	0.06060606060606061	1	ENSP00000357057	2	2	3	1.16239e-05	0.000157101	0.00699383	NA
ENSP00000357087	ENSG00000158716	DUSP23	dual specificity phosphatase 23 [Source:HGNC Symbol;Acc:HGNC:21480]	yes	0.15333333333333332	3	ENSP00000357087,ENSP00000357089,ENSP00000357088	2	2	4	4.45838e-07	0.000460765	0.0172042	14744706
ENSP00000357198	ENSG00000152894	PTPRK	protein tyrosine phosphatase, receptor type, K [Source:HGNC Symbol;Acc:HGNC:9674]	yes	0.054204308547602505	14	ENSP00000487066,ENSP00000487005,ENSP00000357193,ENSP00000483766,ENSP00000357196,ENSP00000357198,ENSP00000434058,ENSP00000477791,ENSP00000487445,ENSP00000484742,ENSP00000432973,ENSP00000357209,ENSP00000486442,ENSP00000357190	7	7	57	7.9153e-34	0.000157101	0.00699383	6.68879e+07
ENSP00000357204	ENSG00000143320	CRABP2	cellular retinoic acid binding protein 2 [Source:HGNC Symbol;Acc:HGNC:2339]	yes	0.2463768115942029	4	ENSP00000357203,ENSP00000357204,ENSP00000482841,ENSP00000357205	3	3	23	3.42587e-10	0.000157101	0.00699383	476276382
ENSP00000357450	ENSG00000163346	PBXIP1	pre-B-cell leukemia homeobox interacting protein 1 [Source:HGNC Symbol;Acc:HGNC:21199]	yes	0.15384615384615385	3	ENSP00000357450,ENSP00000357448,ENSP00000357445	9	9	27	2.71215e-26	0.000157101	0.00699383	4.93377e+07
ENSP00000357616	ENSG00000151640	DPYSL4	dihydropyrimidinase-like 4 [Source:HGNC Symbol;Acc:HGNC:3016]	yes	0.038834951456310676	2	ENSP00000339850,ENSP00000357616	1	1	1	0.000250893	0.000460765	0.0172042	156055
ENSP00000358748	ENSG00000065618	COL17A1	collagen, type XVII, alpha 1 [Source:HGNC Symbol;Acc:HGNC:2194]	yes	0.04098939929328622	2	ENSP00000340937,ENSP00000358748	3	3	16	1.43504e-16	0.000157101	0.00699383	111560265
ENSP00000359121	ENSG00000118733	OLFM3	olfactomedin 3 [Source:HGNC Symbol;Acc:HGNC:17990]	yes	0.026200873362445413	2	ENSP00000345192,ENSP00000359121	1	1	1	0.0010694	0.000460765	0.0172042	NA
ENSP00000359170	ENSG00000166171	DPCD	deleted in primary ciliary dyskinesia homolog (mouse) [Source:HGNC Symbol;Acc:HGNC:24542]	yes	0.09359605911330049	1	ENSP00000359170	2	2	2	0.000118885	0.000460765	0.0172042	1.08689e+07
ENSP00000359436	ENSG00000107566	ERLIN1	ER lipid raft associated 1 [Source:HGNC Symbol;Acc:HGNC:16947]	yes	0.04363636363636364	6	ENSP00000428112,ENSP00000384900,ENSP00000410964,ENSP00000276461,ENSP00000359436,ENSP00000429621	1	1	1	0.0161129	0.00101792	0.0312306	NA
ENSP00000359504	ENSG00000117228	GBP1	guanylate binding protein 1, interferon-inducible [Source:HGNC Symbol;Acc:HGNC:4182]	yes	0.03209459459459459	1	ENSP00000359504	1	1	1	9.19825e-05	0.000157101	0.00699383	1819727
ENSP00000359619	ENSG00000055732	MCOLN3	mucolipin 3 [Source:HGNC Symbol;Acc:HGNC:13358]	yes	0.11838006230529595	3	ENSP00000359619,ENSP00000342698,ENSP00000359621	1	1	1	0.0354042	0.00261622	0.0661527	49992880
ENSP00000359862	ENSG00000137955	RABGGTB	Rab geranylgeranyltransferase, beta subunit [Source:HGNC Symbol;Acc:HGNC:9796]	yes	0.15789473684210525	2	ENSP00000359862,ENSP00000317473	2	2	5	0.000110273	0.000460765	0.0172042	941328
ENSP00000359866	ENSG00000112175	BMP5	bone morphogenetic protein 5 [Source:HGNC Symbol;Acc:HGNC:1072]	yes	0.039647577092511016	1	ENSP00000359866	1	1	2	0.000199507	0.000460765	0.0172042	6495966
ENSP00000360021	ENSG00000172380	GNG12	guanine nucleotide binding protein (G protein), gamma 12 [Source:HGNC Symbol;Acc:HGNC:19663]	yes	0.2222222222222222	1	ENSP00000360021	1	1	6	1.19845e-05	0.000157101	0.00699383	6.37507e+09
ENSP00000360467	ENSG00000108231	LGI1	leucine-rich, glioma inactivated 1 [Source:HGNC Symbol;Acc:HGNC:6572]	yes	0.07560137457044673	4	ENSP00000360472,ENSP00000485917,ENSP00000486908,ENSP00000360467	2	2	3	1.36711e-05	0.000460765	0.0172042	3007714
ENSP00000360473	ENSG00000101132	PFDN4	prefoldin subunit 4 [Source:HGNC Symbol;Acc:HGNC:8868]	yes	0.20149253731343283	2	ENSP00000432441,ENSP00000360473	2	2	4	1.5316e-06	0.000460765	0.0172042	9.05616e+06
ENSP00000360843	ENSG00000185104	FAF1	Fas (TNFRSF6) associated factor 1 [Source:HGNC Symbol;Acc:HGNC:3578]	yes	0.0653061224489796	3	ENSP00000379457,ENSP00000360843,ENSP00000434929	2	2	4	0.000741844	0.000460765	0.0172042	420496
ENSP00000361400	ENSG00000185303	SFTPA2	surfactant protein A2 [Source:HGNC Symbol;Acc:HGNC:10799]	yes	0.2782258064516129	8	ENSP00000361400,ENSP00000361402,ENSP00000401649,ENSP00000395527,ENSP00000397082,ENSP00000397375,ENSP00000381633,ENSP00000411102	6	6	27	8.39326e-33	0.000157101	0.00699383	40797380
ENSP00000361699	ENSG00000171793	CTPS1	CTP synthase 1 [Source:HGNC Symbol;Acc:HGNC:2519]	yes	0.08629441624365482	2	ENSP00000361699,ENSP00000361704	4	4	14	6.18763e-12	0.000157101	0.00699383	11784218
ENSP00000361875	ENSG00000175121	WFDC5	WAP four-disulfide core domain 5 [Source:HGNC Symbol;Acc:HGNC:20477]	yes	0.08130081300813008	2	ENSP00000361875,ENSP00000312381	1	1	5	0.0146037	0.00101792	0.0312306	1199192
ENSP00000362123	ENSG00000138308	PLA2G12B	phospholipase A2, group XIIB [Source:HGNC Symbol;Acc:HGNC:18555]	yes	0.3230769230769231	1	ENSP00000362123	4	4	16	1.46024e-11	0.000157101	0.00699383	13842852
ENSP00000362273	ENSG00000116863	ADPRHL2	ADP-ribosylhydrolase like 2 [Source:HGNC Symbol;Acc:HGNC:21304]	yes	0.10192837465564739	1	ENSP00000362273	3	3	11	0.00017172	0.000460765	0.0172042	104720800
ENSP00000362508	ENSG00000244474	UGT1A4	UDP glucuronosyltransferase 1 family, polypeptide A4 [Source:HGNC Symbol;Acc:HGNC:12536]	yes	0.08801498127340825	11	ENSP00000343838,ENSP00000303174,ENSP00000362513,ENSP00000362525,ENSP00000408608,ENSP00000362508,ENSP00000304845,ENSP00000362523,ENSP00000418532,ENSP00000362549,ENSP00000346768	2	3	8	0.00224183	0.000460765	0.0172042	23649858
ENSP00000362682	ENSG00000185585	OLFML2A	olfactomedin-like 2A [Source:HGNC Symbol;Acc:HGNC:27270]	yes	0.0843558282208589	3	ENSP00000336425,ENSP00000288815,ENSP00000362682	5	5	14	2.00002e-12	0.000157101	0.00699383	3.13595e+07
ENSP00000362803	ENSG00000137168	PPIL1	peptidylprolyl isomerase (cyclophilin)-like 1 [Source:HGNC Symbol;Acc:HGNC:9260]	yes	0.25301204819277107	1	ENSP00000362803	3	3	14	3.45862e-10	0.000157101	0.00699383	9.40035e+07
ENSP00000362888	ENSG00000181915	ADO	2-aminoethanethiol (cysteamine) dioxygenase [Source:HGNC Symbol;Acc:HGNC:23506]	yes	0.07407407407407407	1	ENSP00000362888	2	2	7	0.0184077	0.00126687	0.0366317	643608787
ENSP00000363512	ENSG00000012779	ALOX5	arachidonate 5-lipoxygenase [Source:HGNC Symbol;Acc:HGNC:435]	yes	0.037091988130563795	6	ENSP00000484468,ENSP00000437634,ENSP00000483803,ENSP00000363512,ENSP00000479958,ENSP00000479452	2	2	2	0.000886246	0.000460765	0.0172042	5.4941e+06
ENSP00000363734	ENSG00000204220	PFDN6	prefoldin subunit 6 [Source:HGNC Symbol;Acc:HGNC:4926]	yes	0.16279069767441862	20	ENSP00000363738,ENSP00000372694,ENSP00000449925,ENSP00000363734,ENSP00000363735,ENSP00000382314,ENSP00000415678,ENSP00000403771,ENSP00000400152,ENSP00000395462,ENSP00000412319,ENSP00000382316,ENSP00000378563,ENSP00000402553,ENSP00000447540,ENSP00000398171,ENSP00000448784,ENSP00000402212,ENSP00000448607,ENSP00000404773	2	2	4	2.37415e-05	0.000460765	0.0172042	831251
ENSP00000363826	ENSG00000177283	FZD8	frizzled class receptor 8 [Source:HGNC Symbol;Acc:HGNC:4046]	yes	0.018731988472622477	1	ENSP00000363826	1	1	6	4.79998e-05	0.000157101	0.00699383	10455063
ENSP00000363878	ENSG00000108094	CUL2	cullin 2 [Source:HGNC Symbol;Acc:HGNC:2552]	yes	0.06515580736543909	8	ENSP00000414095,ENSP00000444856,ENSP00000363881,ENSP00000485986,ENSP00000363886,ENSP00000363883,ENSP00000363878,ENSP00000363880	3	3	6	1.63294e-09	0.000157101	0.00699383	9.1222e+07
ENSP00000364104	ENSG00000234068	PAGE2	P antigen family, member 2 (prostate associated) [Source:HGNC Symbol;Acc:HGNC:31804]	yes	0.24468085106382978	4	ENSP00000364107,ENSP00000364104,ENSP00000364113,ENSP00000364110	3	3	9	1.03642e-07	0.000460765	0.0172042	6.31113e+07
ENSP00000364119	ENSG00000125977	EIF2S2	eukaryotic translation initiation factor 2, subunit 2 beta, 38kDa [Source:HGNC Symbol;Acc:HGNC:3266]	yes	0.1111111111111111	1	ENSP00000364119	2	2	2	1.17674e-07	0.000460765	0.0172042	383600
ENSP00000364163	ENSG00000204301	NOTCH4	notch 4 [Source:HGNC Symbol;Acc:HGNC:7884]	yes	0.04792810783824263	7	ENSP00000408335,ENSP00000364163,ENSP00000403447,ENSP00000410674,ENSP00000389207,ENSP00000372751,ENSP00000401321	1	5	31	4.68251e-05	0.000157101	0.00699383	2.8833e+08
ENSP00000364347	ENSG00000213676	ATF6B	activating transcription factor 6 beta [Source:HGNC Symbol;Acc:HGNC:2349]	yes	0.045714285714285714	12	ENSP00000399944,ENSP00000364347,ENSP00000412066,ENSP00000404725,ENSP00000293709,ENSP00000372642,ENSP00000364349,ENSP00000404814,ENSP00000391131,ENSP00000393419,ENSP00000399764,ENSP00000389467	3	3	64	2.10488e-10	0.000460765	0.0172042	8.75037e+09
ENSP00000364486	ENSG00000130957	FBP2	fructose-1,6-bisphosphatase 2 [Source:HGNC Symbol;Acc:HGNC:3607]	yes	0.07079646017699115	1	ENSP00000364486	2	2	3	8.0487e-07	0.000460765	0.0172042	2.42868e+06
ENSP00000364514	ENSG00000124313	IQSEC2	IQ motif and Sec7 domain 2 [Source:HGNC Symbol;Acc:HGNC:29059]	yes	0.045310853530031614	2	ENSP00000379712,ENSP00000364514	1	1	1	0.0448091	0.0031314	0.0766336	472163
ENSP00000364590	ENSG00000139842	CUL4A	cullin 4A [Source:HGNC Symbol;Acc:HGNC:2554]	yes	0.09256449165402124	9	ENSP00000360373,ENSP00000389118,ENSP00000360374,ENSP00000384109,ENSP00000481782,ENSP00000322132,ENSP00000364589,ENSP00000364590,ENSP00000338919	5	5	8	1.44757e-13	0.000157101	0.00699383	3371711
ENSP00000364801	ENSG00000204388	HSPA1B	heat shock 70kDa protein 1B [Source:HGNC Symbol;Acc:HGNC:5233]	yes	0.34009360374414976	40	ENSP00000372880,ENSP00000393087,ENSP00000403530,ENSP00000437125,ENSP00000406359,ENSP00000404372,ENSP00000227378,ENSP00000324173,ENSP00000436183,ENSP00000436762,ENSP00000408347,ENSP00000396486,ENSP00000433584,ENSP00000375399,ENSP00000364802,ENSP00000375391,ENSP00000387691,ENSP00000364805,ENSP00000372881,ENSP00000442789,ENSP00000434415,ENSP00000310219,ENSP00000247207,ENSP00000408907,ENSP00000364801…	6	14	161	2.81435e-29	0.000157101	0.00699383	103095152
ENSP00000364813	ENSG00000204392	LSM2	LSM2 homolog, U6 small nuclear RNA associated (S. cerevisiae) [Source:HGNC Symbol;Acc:HGNC:13940]	yes	0.3157894736842105	6	ENSP00000372883,ENSP00000414006,ENSP00000364813,ENSP00000403345,ENSP00000414634,ENSP00000406280	2	2	3	6.98887e-09	0.000157101	0.00699383	2206021
ENSP00000364840	ENSG00000204396	VWA7	von Willebrand factor A domain containing 7 [Source:HGNC Symbol;Acc:HGNC:13939]	yes	0.051627384960718295	6	ENSP00000413704,ENSP00000390732,ENSP00000406943,ENSP00000364840,ENSP00000411910,ENSP00000411804	4	4	5	1.22796e-12	0.000157101	0.00699383	18216118
ENSP00000364943	ENSG00000213722	DDAH2	dimethylarginine dimethylaminohydrolase 2 [Source:HGNC Symbol;Acc:HGNC:2716]	yes	0.22105263157894736	42	ENSP00000411554,ENSP00000364949,ENSP00000405005,ENSP00000394578,ENSP00000409450,ENSP00000410144,ENSP00000412800,ENSP00000399023,ENSP00000391632,ENSP00000390549,ENSP00000404342,ENSP00000408148,ENSP00000402854,ENSP00000393967,ENSP00000403154,ENSP00000405515,ENSP00000402594,ENSP00000413164,ENSP00000399357,ENSP00000389552,ENSP00000395759,ENSP00000415005,ENSP00000382936,ENSP00000388456,ENSP00000372901…	4	4	36	5.36495e-19	0.000157101	0.00699383	60702888
ENSP00000364992	ENSG00000204424	LY6G6F	lymphocyte antigen 6 complex, locus G6F [Source:HGNC Symbol;Acc:HGNC:13933]	yes	0.15151515151515152	14	ENSP00000412362,ENSP00000372912,ENSP00000421232,ENSP00000404884,ENSP00000409959,ENSP00000406832,ENSP00000412832,ENSP00000413440,ENSP00000397708,ENSP00000407535,ENSP00000364992,ENSP00000382956,ENSP00000404621,ENSP00000389102	2	2	2	6.5939e-05	0.000157101	0.00699383	290800
ENSP00000365075	ENSG00000215704	CELA2B	chymotrypsin-like elastase family, member 2B [Source:HGNC Symbol;Acc:HGNC:29995]	yes	0.04460966542750929	1	ENSP00000365075	1	1	4	0.0020763	0.000460765	0.0172042	1.91543e+07
ENSP00000365272	ENSG00000150672	DLG2	discs, large homolog 2 (Drosophila) [Source:HGNC Symbol;Acc:HGNC:2901]	yes	0.05333333333333334	21	ENSP00000345731,ENSP00000365272,ENSP00000350303,ENSP00000391732,ENSP00000393049,ENSP00000391017,ENSP00000381355,ENSP00000433848,ENSP00000411278,ENSP00000435849,ENSP00000280241,ENSP00000409133,ENSP00000432894,ENSP00000398939,ENSP00000385113,ENSP00000376187,ENSP00000413238,ENSP00000407531,ENSP00000396658,ENSP00000381353,ENSP00000402275	3	3	4	0.00994641	0.00101792	0.0312306	5.48712e+06
ENSP00000365285	ENSG00000204487	LTB	lymphotoxin beta (TNF superfamily, member 3) [Source:HGNC Symbol;Acc:HGNC:6711]	yes	0.10245901639344263	8	ENSP00000365285,ENSP00000404014,ENSP00000372985,ENSP00000395102,ENSP00000398741,ENSP00000393693,ENSP00000410481,ENSP00000404450	1	1	3	3.54339e-05	0.000157101	0.00699383	1738680
ENSP00000365522	ENSG00000165118	C9orf64	chromosome 9 open reading frame 64 [Source:HGNC Symbol;Acc:HGNC:28144]	yes	0.08797653958944282	2	ENSP00000365522,ENSP00000318375	3	3	8	6.79666e-06	0.000460765	0.0172042	9350978
ENSP00000365817	ENSG00000204592	HLA-E	major histocompatibility complex, class I, E [Source:HGNC Symbol;Acc:HGNC:4962]	yes	0.09497206703910614	30	ENSP00000436637,ENSP00000397420,ENSP00000435957,ENSP00000402694,ENSP00000393458,ENSP00000365402,ENSP00000397867,ENSP00000365817,ENSP00000400458,ENSP00000407051,ENSP00000414063,ENSP00000373091,ENSP00000404526,ENSP00000433088,ENSP00000410214,ENSP00000390707,ENSP00000400842,ENSP00000399168,ENSP00000399675,ENSP00000391250,ENSP00000409910,ENSP00000400410,ENSP00000405931,ENSP00000403624,ENSP00000372819…	2	3	24	0.000617546	0.00101792	0.0312306	257064
ENSP00000366018	ENSG00000206505	HLA-A	major histocompatibility complex, class I, A [Source:HGNC Symbol;Acc:HGNC:4931]	yes	0.3076923076923077	90	ENSP00000447635,ENSP00000397962,ENSP00000390851,ENSP00000366002,ENSP00000406366,ENSP00000415025,ENSP00000379873,ENSP00000407431,ENSP00000391250,ENSP00000431347,ENSP00000398169,ENSP00000413189,ENSP00000391738,ENSP00000432736,ENSP00000388208,ENSP00000449453,ENSP00000407494,ENSP00000394889,ENSP00000480331,ENSP00000403922,ENSP00000366018,ENSP00000397867,ENSP00000411867,ENSP00000447962,ENSP00000410645…	2	9	103	2.8837e-05	0.000460765	0.0172042	271622368
ENSP00000366746	ENSG00000136738	STAM	signal transducing adaptor molecule (SH3 domain and ITAM motif) 1 [Source:HGNC Symbol;Acc:HGNC:11357]	yes	0.04814814814814815	2	ENSP00000400025,ENSP00000366746	2	2	6	1.66641e-10	0.000157101	0.00699383	17504394
ENSP00000367558	ENSG00000124486	USP9X	ubiquitin specific peptidase 9, X-linked [Source:HGNC Symbol;Acc:HGNC:12632]	yes	0.05559906029757244	3	ENSP00000316357,ENSP00000342812,ENSP00000367558	8	8	11	2.94456e-11	0.000157101	0.00699383	2.71986e+09
ENSP00000368228	ENSG00000198814	GK	glycerol kinase [Source:HGNC Symbol;Acc:HGNC:4289]	yes	0.02480916030534351	4	ENSP00000368229,ENSP00000368228,ENSP00000401720,ENSP00000368226	1	1	3	9.47079e-06	0.000157101	0.00699383	2.57653e+06
ENSP00000368278	ENSG00000169306	IL1RAPL1	interleukin 1 receptor accessory protein-like 1 [Source:HGNC Symbol;Acc:HGNC:5996]	yes	0.09195402298850575	2	ENSP00000305200,ENSP00000368278	4	4	5	5.65499e-06	0.000157101	0.00699383	194356419
ENSP00000368496	ENSG00000176022	B3GALT6	UDP-Gal:betaGal beta 1,3-galactosyltransferase polypeptide 6 [Source:HGNC Symbol;Acc:HGNC:17978]	yes	0.08206686930091185	1	ENSP00000368496	3	3	15	0.000229268	0.00287992	0.0716254	14294035
ENSP00000368721	ENSG00000166863	TAC3	tachykinin 3 [Source:HGNC Symbol;Acc:HGNC:11521]	yes	0.11650485436893204	10	ENSP00000408208,ENSP00000483110,ENSP00000350236,ENSP00000416292,ENSP00000404056,ENSP00000402995,ENSP00000368721,ENSP00000408131,ENSP00000377445,ENSP00000300108	1	1	1	0.00183406	0.000460765	0.0172042	765689
ENSP00000369026	ENSG00000107262	BAG1	BCL2-associated athanogene [Source:HGNC Symbol;Acc:HGNC:937]	yes	0.10869565217391304	3	ENSP00000419092,ENSP00000420514,ENSP00000369026	2	2	3	1.39687e-05	0.000460765	0.0172042	3110444
ENSP00000369644	ENSG00000166797	FAM96A	family with sequence similarity 96, member A [Source:HGNC Symbol;Acc:HGNC:26235]	yes	0.08823529411764706	4	ENSP00000454079,ENSP00000300030,ENSP00000369644,ENSP00000452953	1	1	3	0.073623	0.00535184	0.119514	430001
ENSP00000370055	ENSG00000122042	UBL3	ubiquitin-like 3 [Source:HGNC Symbol;Acc:HGNC:12504]	yes	0.23076923076923078	1	ENSP00000370055	2	2	3	1.32064e-06	0.000460765	0.0172042	71057568
ENSP00000370113	ENSG00000221914	PPP2R2A	protein phosphatase 2, regulatory subunit B, alpha [Source:HGNC Symbol;Acc:HGNC:9304]	yes	0.09172259507829977	8	ENSP00000422374,ENSP00000370113,ENSP00000335083,ENSP00000372042,ENSP00000425247,ENSP00000423649,ENSP00000430320,ENSP00000325074	2	2	2	0.00656292	0.00101792	0.0312306	1.08668e+06
ENSP00000370257	ENSG00000164946	FREM1	FRAS1 related extracellular matrix 1 [Source:HGNC Symbol;Acc:HGNC:23399]	yes	0.015730337078651686	3	ENSP00000412940,ENSP00000370262,ENSP00000370257	2	2	2	7.74542e-05	0.000460765	0.0172042	3643127
ENSP00000371236	ENSG00000159131	GART	phosphoribosylglycinamide formyltransferase, phosphoribosylglycinamide synthetase, phosphoribosylaminoimidazole synthetase [Source:HGNC Symbol;Acc:HGNC:4163]	yes	0.07326732673267326	10	ENSP00000413040,ENSP00000354388,ENSP00000390003,ENSP00000371261,ENSP00000398631,ENSP00000409771,ENSP00000413803,ENSP00000371253,ENSP00000407783,ENSP00000371236	5	5	12	1.61012e-09	0.000157101	0.00699383	5.49782e+07
ENSP00000371271	ENSG00000134551	PRH2	proline-rich protein HaeIII subfamily 2 [Source:HGNC Symbol;Acc:HGNC:9367]	yes	0.5301204819277109	13	ENSP00000483458,ENSP00000458690,ENSP00000482961,ENSP00000371271,ENSP00000412436,ENSP00000461041,ENSP00000479778,ENSP00000482068,ENSP00000479168,ENSP00000482363,ENSP00000481761,ENSP00000481810,ENSP00000379682	1	2	4	0.00630399	0.00101792	0.0312306	NA
ENSP00000371511	ENSG00000273294	C1QTNF3-AMACR	C1QTNF3-AMACR readthrough (NMD candidate) [Source:HGNC Symbol;Acc:HGNC:49198]	yes	0.07394366197183098	3	ENSP00000371497,ENSP00000371511,ENSP00000231338	1	2	12	0.0251904	0.00126687	0.0366317	NA
ENSP00000372608	ENSG00000227993	HLA-DRA	major histocompatibility complex, class II, DR alpha [Source:HGNC Symbol;Acc:HGNC:4947]	yes	0.13385826771653545	18	ENSP00000372608,ENSP00000411610,ENSP00000372745,ENSP00000385362,ENSP00000402951,ENSP00000372746,ENSP00000378786,ENSP00000412562,ENSP00000479287,ENSP00000398838,ENSP00000360917,ENSP00000392789,ENSP00000360916,ENSP00000364121,ENSP00000405295,ENSP00000410443,ENSP00000403385,ENSP00000404533	3	3	18	1.68036e-10	0.000157101	0.00699383	264538351
ENSP00000372645	ENSG00000233323	TNXB	tenascin XB [Source:HGNC Symbol;Acc:HGNC:11976]	yes	0.19658929417337753	17	ENSP00000372645,ENSP00000387561,ENSP00000447694,ENSP00000449211,ENSP00000406495,ENSP00000447841,ENSP00000448326,ENSP00000389677,ENSP00000387438,ENSP00000364393,ENSP00000483409,ENSP00000418248,ENSP00000393091,ENSP00000447829,ENSP00000480067,ENSP00000407685,ENSP00000399153	3	67	982	3.55486e-26	0.000157101	0.00699383	3.71687e+08
ENSP00000372738	ENSG00000206305	HLA-DQA1	major histocompatibility complex, class II, DQ alpha 1 [Source:HGNC Symbol;Acc:HGNC:4942]	yes	0.06692913385826772	6	ENSP00000449195,ENSP00000447257,ENSP00000382583,ENSP00000372738,ENSP00000447970,ENSP00000382586	1	1	2	0.000126937	0.000157101	0.00699383	24045
ENSP00000373235	ENSG00000178467	P4HTM	prolyl 4-hydroxylase, transmembrane (endoplasmic reticulum) [Source:HGNC Symbol;Acc:HGNC:28858]	yes	0.17330677290836655	3	ENSP00000476303,ENSP00000373235,ENSP00000341422	4	4	8	0.000319261	0.000460765	0.0172042	47539478
ENSP00000373669	ENSG00000196544	C17orf59	chromosome 17 open reading frame 59 [Source:HGNC Symbol;Acc:HGNC:25939]	yes	0.05322128851540616	1	ENSP00000373669	1	1	3	2.25998e-07	0.000157101	0.00699383	NA
ENSP00000373798	ENSG00000135506	OS9	osteosarcoma amplified 9, endoplasmic reticulum lectin [Source:HGNC Symbol;Acc:HGNC:16994]	yes	0.14263803680981596	13	ENSP00000447866,ENSP00000373794,ENSP00000373798,ENSP00000318165,ENSP00000257966,ENSP00000407360,ENSP00000447451,ENSP00000450010,ENSP00000447719,ENSP00000413112,ENSP00000447163,ENSP00000389632,ENSP00000447031	5	6	15	1.91534e-15	0.000157101	0.00699383	134795219
ENSP00000374782	ENSG00000243063	IGKV3-7	immunoglobulin kappa variable 3-7 (non-functional) [Source:HGNC Symbol;Acc:HGNC:5821]	yes	0.15517241379310345	1	ENSP00000374782	1	1	4	0.0274336	0.00235474	0.0608439	70156992
ENSP00000374835	ENSG00000211654	IGLV5-37	immunoglobulin lambda variable 5-37 [Source:HGNC Symbol;Acc:HGNC:5922]	yes	0.08943089430894309	2	ENSP00000487591,ENSP00000374835	1	1	4	5.63877e-05	0.000157101	0.00699383	23098820
ENSP00000374856	ENSG00000211677	IGLC2	immunoglobulin lambda constant 2 (Kern-Oz- marker) [Source:HGNC Symbol;Acc:HGNC:5856]	yes	0.46226415094339623	15	ENSP00000480519,ENSP00000374856,ENSP00000374857,ENSP00000484805,ENSP00000374855,ENSP00000482028,ENSP00000480121,ENSP00000481964,ENSP00000480721,ENSP00000431254,ENSP00000480497,ENSP00000478359,ENSP00000436353,ENSP00000374859,ENSP00000480892	3	3	4	1.07879e-06	0.000460765	0.0172042	48648958
ENSP00000374985	ENSG00000211892	IGHG4	immunoglobulin heavy constant gamma 4 (G4m marker) [Source:HGNC Symbol;Acc:HGNC:5528]	yes	0.2782874617737003	23	ENSP00000483967,ENSP00000374984,ENSP00000483022,ENSP00000374991,ENSP00000374987,ENSP00000483165,ENSP00000483341,ENSP00000481569,ENSP00000481691,ENSP00000479178,ENSP00000478578,ENSP00000481130,ENSP00000479626,ENSP00000484069,ENSP00000374990,ENSP00000481725,ENSP00000374993,ENSP00000480351,ENSP00000479728,ENSP00000483889,ENSP00000478845,ENSP00000483393,ENSP00000374985	3	7	120	9.75925e-18	0.000157101	0.00699383	4466494224
ENSP00000374987	ENSG00000211893	IGHG2	immunoglobulin heavy constant gamma 2 (G2m marker) [Source:HGNC Symbol;Acc:HGNC:5526]	yes	0.4325153374233129	23	ENSP00000483967,ENSP00000374984,ENSP00000483022,ENSP00000374991,ENSP00000374987,ENSP00000483165,ENSP00000483341,ENSP00000481569,ENSP00000481691,ENSP00000479178,ENSP00000478578,ENSP00000481130,ENSP00000479626,ENSP00000484069,ENSP00000374990,ENSP00000481725,ENSP00000374993,ENSP00000480351,ENSP00000479728,ENSP00000483889,ENSP00000478845,ENSP00000483393,ENSP00000374985	6	11	217	1.64919e-24	0.000157101	0.00699383	2.50812e+09
ENSP00000374989	ENSG00000211895	IGHA1	immunoglobulin heavy constant alpha 1 [Source:HGNC Symbol;Acc:HGNC:5478]	yes	0.21813031161473087	3	ENSP00000374989,ENSP00000374981,ENSP00000478870	4	4	89	7.39422e-18	0.000157101	0.00699383	6.3598e+08
ENSP00000375012	ENSG00000211943	IGHV3-15	immunoglobulin heavy variable 3-15 [Source:HGNC Symbol;Acc:HGNC:5582]	yes	0.23529411764705882	1	ENSP00000375012	2	2	3	4.43009e-05	0.000157101	0.00699383	53923655
ENSP00000375013	ENSG00000211944	IGHV3-16	immunoglobulin heavy variable 3-16 (non-functional) [Source:HGNC Symbol;Acc:HGNC:5583]	yes	0.09401709401709402	1	ENSP00000375013	1	1	2	0.00383792	0.000460765	0.0172042	NA
ENSP00000375014	ENSG00000211945	IGHV1-18	immunoglobulin heavy variable 1-18 [Source:HGNC Symbol;Acc:HGNC:5549]	yes	0.23931623931623933	4	ENSP00000375014,ENSP00000375003,ENSP00000483341,ENSP00000481691	3	4	15	2.29441e-17	0.000157101	0.00699383	1300851393
ENSP00000375018	ENSG00000211949	IGHV3-23	immunoglobulin heavy variable 3-23 [Source:HGNC Symbol;Acc:HGNC:5588]	yes	0.09401709401709402	2	ENSP00000474524,ENSP00000375018	1	1	29	0.000216236	0.000460765	0.0172042	4.03679e+08
ENSP00000375020	ENSG00000211951	IGHV2-26	immunoglobulin heavy variable 2-26 [Source:HGNC Symbol;Acc:HGNC:5575]	yes	0.18487394957983194	1	ENSP00000375020	1	1	2	7.67664e-09	0.000157101	0.00699383	NA
ENSP00000375026	ENSG00000211957	IGHV3-35	immunoglobulin heavy variable 3-35 (non-functional) [Source:HGNC Symbol;Acc:HGNC:5598]	yes	0.09401709401709402	1	ENSP00000375026	1	1	16	0.000199507	0.000460765	0.0172042	840808496
ENSP00000375030	ENSG00000211961	IGHV1-45	immunoglobulin heavy variable 1-45 [Source:HGNC Symbol;Acc:HGNC:5553]	yes	0.09401709401709402	2	ENSP00000375030,ENSP00000479304	2	2	4	0.00159012	0.000460765	0.0172042	6105922
ENSP00000375043	ENSG00000211974			yes	0.3025210084033613	3	ENSP00000485200,ENSP00000375043,ENSP00000473889	4	4	10	4.38667e-22	0.000157101	0.00699383	9.56332e+07
ENSP00000375045	ENSG00000211976	IGHV3-73	immunoglobulin heavy variable 3-73 [Source:HGNC Symbol;Acc:HGNC:5623]	yes	0.2184873949579832	5	ENSP00000375034,ENSP00000484690,ENSP00000478467,ENSP00000375045,ENSP00000480695	2	2	26	7.60937e-05	0.000460765	0.0172042	60785320
ENSP00000375821	ENSG00000077157	PPP1R12B	protein phosphatase 1, regulatory subunit 12B [Source:HGNC Symbol;Acc:HGNC:7619]	yes	0.06451612903225806	4	ENSP00000476755,ENSP00000375821,ENSP00000480852,ENSP00000484005	1	1	3	0.00996518	0.00101792	0.0312306	6186550
ENSP00000375881	ENSG00000163283	ALPP	alkaline phosphatase, placental [Source:HGNC Symbol;Acc:HGNC:439]	yes	0.14018691588785046	3	ENSP00000295453,ENSP00000375881,ENSP00000483564	4	4	7	4.48063e-19	0.000157101	0.00699383	1.93287e+08
ENSP00000376214	ENSG00000143627	PKLR	pyruvate kinase, liver and RBC [Source:HGNC Symbol;Acc:HGNC:9020]	yes	0.285451197053407	13	ENSP00000339933,ENSP00000455736,ENSP00000373745,ENSP00000320171,ENSP00000457253,ENSP00000455901,ENSP00000456970,ENSP00000461487,ENSP00000459921,ENSP00000334983,ENSP00000456100,ENSP00000376214,ENSP00000403365	9	10	71	2.69888e-33	0.000157101	0.00699383	1372890800
ENSP00000376341	ENSG00000177954	RPS27	ribosomal protein S27 [Source:HGNC Symbol;Acc:HGNC:10416]	yes	0.16666666666666666	2	ENSP00000357555,ENSP00000376341	1	1	1	0.00156094	0.000460765	0.0172042	135640096
ENSP00000376570	ENSG00000144278	GALNT13	polypeptide N-acetylgalactosaminyltransferase 13 [Source:HGNC Symbol;Acc:HGNC:23242]	yes	0.052158273381294966	6	ENSP00000406237,ENSP00000376570,ENSP00000387239,ENSP00000465341,ENSP00000269195,ENSP00000396612	2	4	9	0.000205971	0.00101792	0.0312306	3209936
ENSP00000376793	ENSG00000273259		Alpha-1-antichymotrypsin Alpha-1-antichymotrypsin His-Pro-less [Source:UniProtKB/Swiss-Prot;Acc:P01011]	yes	0.6784869976359338	7	ENSP00000451119,ENSP00000481617,ENSP00000450540,ENSP00000452476,ENSP00000376793,ENSP00000376795,ENSP00000452246	30	59	11399	1.60225e-127	0.000157101	0.00699383	19462303744
ENSP00000376808	ENSG00000166266	CUL5	cullin 5 [Source:HGNC Symbol;Acc:HGNC:2556]	yes	0.05384615384615385	2	ENSP00000376808,ENSP00000435376	4	4	11	2.06701e-07	0.000460765	0.0172042	3.98084e+07
ENSP00000376889	ENSG00000011052	NME2	NME/NM23 nucleoside diphosphate kinase 2 [Source:HGNC Symbol;Acc:HGNC:7850]	yes	0.13857677902621723	14	ENSP00000429318,ENSP00000425581,ENSP00000365572,ENSP00000421064,ENSP00000451932,ENSP00000013034,ENSP00000376886,ENSP00000376892,ENSP00000435498,ENSP00000337060,ENSP00000426976,ENSP00000428553,ENSP00000426901,ENSP00000376889	4	4	16	2.08825e-13	0.000157101	0.00699383	110959518
ENSP00000377121	ENSG00000135269	TES	testin LIM domain protein [Source:HGNC Symbol;Acc:HGNC:14620]	yes	0.04854368932038835	3	ENSP00000377124,ENSP00000377121,ENSP00000350937	2	2	3	0.00057743	0.000460765	0.0172042	1.44542e+07
ENSP00000377778	ENSG00000141741	MIEN1	migration and invasion enhancer 1 [Source:HGNC Symbol;Acc:HGNC:28230]	yes	0.3565217391304348	2	ENSP00000377778,ENSP00000462998	3	3	20	1.03567e-07	0.000157101	0.00699383	2.7567e+07
ENSP00000378748	ENSG00000204264	PSMB8	proteasome (prosome, macropain) subunit, beta type, 8 [Source:HGNC Symbol;Acc:HGNC:9545]	yes	0.20238095238095238	24	ENSP00000394155,ENSP00000406913,ENSP00000401868,ENSP00000382538,ENSP00000364016,ENSP00000408825,ENSP00000364015,ENSP00000412618,ENSP00000406878,ENSP00000378748,ENSP00000396430,ENSP00000407539,ENSP00000404615,ENSP00000394090,ENSP00000392693,ENSP00000397057,ENSP00000414731,ENSP00000372725,ENSP00000402406,ENSP00000372723,ENSP00000410205,ENSP00000404585,ENSP00000414770,ENSP00000406797	2	2	12	2.61213e-08	0.000157101	0.00699383	1.30844e+07
ENSP00000378812	ENSG00000106153	CHCHD2	coiled-coil-helix-coiled-coil-helix domain containing 2 [Source:HGNC Symbol;Acc:HGNC:21645]	yes	0.06622516556291391	1	ENSP00000378812	1	1	1	0.0404424	0.00287992	0.0716254	669559
ENSP00000379610	ENSG00000104972	LILRB1	leukocyte immunoglobulin-like receptor, subfamily B (with TM and ITIM domains), member 1 [Source:HGNC Symbol;Acc:HGNC:6605]	yes	0.12145110410094637	59	ENSP00000478648,ENSP00000484938,ENSP00000379614,ENSP00000395004,ENSP00000480365,ENSP00000379623,ENSP00000481949,ENSP00000480302,ENSP00000481701,ENSP00000375628,ENSP00000379608,ENSP00000480841,ENSP00000481972,ENSP00000481208,ENSP00000391514,ENSP00000319960,ENSP00000483553,ENSP00000479887,ENSP00000480587,ENSP00000481605,ENSP00000480022,ENSP00000481897,ENSP00000379610,ENSP00000478282,ENSP00000483646…	2	5	18	0.0124371	0.00126687	0.0366317	1.09467e+06
ENSP00000379672	ENSG00000196230	TUBB	tubulin, beta class I [Source:HGNC Symbol;Acc:HGNC:20778]	yes	0.19248826291079812	46	ENSP00000403868,ENSP00000320295,ENSP00000392914,ENSP00000391515,ENSP00000401546,ENSP00000383378,ENSP00000410829,ENSP00000416480,ENSP00000394124,ENSP00000399155,ENSP00000409249,ENSP00000451560,ENSP00000264071,ENSP00000403213,ENSP00000379668,ENSP00000451617,ENSP00000443590,ENSP00000259818,ENSP00000339001,ENSP00000365578,ENSP00000401317,ENSP00000406981,ENSP00000373058,ENSP00000395838,ENSP00000406811…	2	7	29	1.20913e-07	0.000157101	0.00699383	4.56106e+06
ENSP00000379801	ENSG00000133805	AMPD3	adenosine monophosphate deaminase 3 [Source:HGNC Symbol;Acc:HGNC:470]	yes	0.12516297262059975	9	ENSP00000435382,ENSP00000436987,ENSP00000432707,ENSP00000379801,ENSP00000379802,ENSP00000396000,ENSP00000431648,ENSP00000433937,ENSP00000433284	7	7	15	1.15936e-17	0.000157101	0.00699383	1.88195e+07
ENSP00000380542	ENSG00000071282	LMCD1	LIM and cysteine-rich domains 1 [Source:HGNC Symbol;Acc:HGNC:6633]	yes	0.05533596837944664	3	ENSP00000396515,ENSP00000157600,ENSP00000380542	1	1	1	0.000904605	0.000460765	0.0172042	1713872
ENSP00000380702	ENSG00000214114	MYCBP	MYC binding protein [Source:HGNC Symbol;Acc:HGNC:7554]	yes	0.1941747572815534	2	ENSP00000380702,ENSP00000479064	1	1	1	0.000123831	0.000157101	0.00699383	1408248
ENSP00000382178	ENSG00000139915	MDGA2	MAM domain containing glycosylphosphatidylinositol anchor 2 [Source:HGNC Symbol;Acc:HGNC:19835]	yes	0.06799163179916318	4	ENSP00000450827,ENSP00000405456,ENSP00000382178,ENSP00000349925	4	4	4	3.42535e-07	0.000157101	0.00699383	12233359309
ENSP00000382301	ENSG00000205726	ITSN1	intersectin 1 (SH3 domain protein) [Source:HGNC Symbol;Acc:HGNC:6183]	yes	0.022144522144522144	9	ENSP00000370719,ENSP00000382290,ENSP00000382292,ENSP00000382275,ENSP00000382286,ENSP00000382289,ENSP00000370691,ENSP00000382301,ENSP00000370685	2	2	3	0.00287411	0.000460765	0.0172042	3757631
ENSP00000382356	ENSG00000215018	COL28A1	collagen, type XXVIII, alpha 1 [Source:HGNC Symbol;Acc:HGNC:22442]	yes	0.011555555555555555	1	ENSP00000382356	1	1	10	0.000505233	0.000460765	0.0172042	1.74943e+07
ENSP00000382523	ENSG00000205531	NAP1L4	nucleosome assembly protein 1-like 4 [Source:HGNC Symbol;Acc:HGNC:7640]	yes	0.1794871794871795	34	ENSP00000405912,ENSP00000431644,ENSP00000409795,ENSP00000444759,ENSP00000483728,ENSP00000369915,ENSP00000448661,ENSP00000435327,ENSP00000382523,ENSP00000432126,ENSP00000446756,ENSP00000449649,ENSP00000261182,ENSP00000448167,ENSP00000449333,ENSP00000448133,ENSP00000477538,ENSP00000446520,ENSP00000431799,ENSP00000481412,ENSP00000387783,ENSP00000445008,ENSP00000434759,ENSP00000478654,ENSP00000450236…	1	2	12	0.000137581	0.000157101	0.00699383	9415078
ENSP00000382578	ENSG00000206302	HLA-DQB1	major histocompatibility complex, class II, DQ beta 1 [Source:HGNC Symbol;Acc:HGNC:4944]	yes	0.16071428571428573	74	ENSP00000382038,ENSP00000388249,ENSP00000410330,ENSP00000382578,ENSP00000481487,ENSP00000396539,ENSP00000407332,ENSP00000414079,ENSP00000407674,ENSP00000382025,ENSP00000408879,ENSP00000479795,ENSP00000408940,ENSP00000396095,ENSP00000382034,ENSP00000447061,ENSP00000382018,ENSP00000389288,ENSP00000331343,ENSP00000393651,ENSP00000353099,ENSP00000411486,ENSP00000414196,ENSP00000399298,ENSP00000400149…	1	3	10	0.00864467	0.00101792	0.0312306	1.50548e+07
ENSP00000384197	ENSG00000165966	PDZRN4	PDZ domain containing ring finger 4 [Source:HGNC Symbol;Acc:HGNC:30552]	yes	0.027992277992277992	1	ENSP00000384197	1	1	29	0.0838418	0.00717386	0.152337	7512570
ENSP00000384661	ENSG00000168397	ATG4B	autophagy related 4B, cysteine peptidase [Source:HGNC Symbol;Acc:HGNC:20790]	yes	0.13595166163141995	9	ENSP00000404783,ENSP00000407389,ENSP00000384661,ENSP00000383582,ENSP00000383964,ENSP00000409895,ENSP00000384259,ENSP00000410526,ENSP00000400050	3	3	5	5.83426e-11	0.000157101	0.00699383	7.06774e+07
ENSP00000384890	ENSG00000184347	SLIT3	slit homolog 3 (Drosophila) [Source:HGNC Symbol;Acc:HGNC:11087]	yes	0.006460875807609476	3	ENSP00000332164,ENSP00000430333,ENSP00000384890	1	1	1	0.0261288	0.00181664	0.0491923	1182090
ENSP00000384915	ENSG00000134326	CMPK2	cytidine monophosphate (UMP-CMP) kinase 2, mitochondrial [Source:HGNC Symbol;Acc:HGNC:27015]	yes	0.034229828850855744	2	ENSP00000256722,ENSP00000384915	1	1	1	0.0569764	0.00391009	0.092069	NA
ENSP00000385453	ENSG00000187045	TMPRSS6	transmembrane protease, serine 6 [Source:HGNC Symbol;Acc:HGNC:16517]	yes	0.017456359102244388	4	ENSP00000334962,ENSP00000384964,ENSP00000385453,ENSP00000371211	1	1	1	0.0371609	0.00261622	0.0661527	4142176
ENSP00000385706	ENSG00000242221	PSG2	pregnancy specific beta-1-glycoprotein 2 [Source:HGNC Symbol;Acc:HGNC:9519]	yes	0.33134328358208953	25	ENSP00000332984,ENSP00000472717,ENSP00000244296,ENSP00000319140,ENSP00000332215,ENSP00000472372,ENSP00000385706,ENSP00000478484,ENSP00000304913,ENSP00000468936,ENSP00000385869,ENSP00000471453,ENSP00000386090,ENSP00000385427,ENSP00000480223,ENSP00000470690,ENSP00000469575,ENSP00000305005,ENSP00000244293,ENSP00000472610,ENSP00000385081,ENSP00000385736,ENSP00000469292,ENSP00000308970,ENSP00000413041	1	9	36	0.000406746	0.000460765	0.0172042	49886
ENSP00000385869	ENSG00000124467	PSG8	pregnancy specific beta-1-glycoprotein 8 [Source:HGNC Symbol;Acc:HGNC:9525]	yes	0.2577565632458234	21	ENSP00000472717,ENSP00000244296,ENSP00000319140,ENSP00000332215,ENSP00000472372,ENSP00000385706,ENSP00000470690,ENSP00000478484,ENSP00000469575,ENSP00000468936,ENSP00000305005,ENSP00000385386,ENSP00000472610,ENSP00000385081,ENSP00000469292,ENSP00000472284,ENSP00000385869,ENSP00000480223,ENSP00000386090,ENSP00000308970,ENSP00000413041	4	8	23	2.2433e-12	0.000157101	0.00699383	1.45306e+08
ENSP00000386416	ENSG00000110076	NRXN2	neurexin 2 [Source:HGNC Symbol;Acc:HGNC:8009]	yes	0.025806451612903226	16	ENSP00000407374,ENSP00000434015,ENSP00000450683,ENSP00000485887,ENSP00000385580,ENSP00000486879,ENSP00000385017,ENSP00000265459,ENSP00000451648,ENSP00000301894,ENSP00000385142,ENSP00000366774,ENSP00000386416,ENSP00000366782,ENSP00000485815,ENSP00000338349	1	4	5	0.0142488	0.00101792	0.0312306	NA
ENSP00000386490	ENSG00000180354	MTURN	maturin, neural progenitor differentiation regulator homolog (Xenopus) [Source:HGNC Symbol;Acc:HGNC:25457]	yes	0.18888888888888888	2	ENSP00000386490,ENSP00000324204	1	1	1	9.23899e-06	0.000157101	0.00699383	NA
ENSP00000386536	ENSG00000065911	MTHFD2	methylenetetrahydrofolate dehydrogenase (NADP+ dependent) 2, methenyltetrahydrofolate cyclohydrolase [Source:HGNC Symbol;Acc:HGNC:7434]	yes	0.05405405405405406	2	ENSP00000377617,ENSP00000386536	1	1	1	0.0169241	0.00101792	0.0312306	62675816
ENSP00000386653	ENSG00000197991	PCDH20	protocadherin 20 [Source:HGNC Symbol;Acc:HGNC:14257]	yes	0.06519453207150368	2	ENSP00000387250,ENSP00000386653	4	4	4	4.72075e-13	0.000157101	0.00699383	4342588
ENSP00000387114	ENSG00000155093	PTPRN2	protein tyrosine phosphatase, receptor type, N polypeptide 2 [Source:HGNC Symbol;Acc:HGNC:9677]	yes	0.03480040941658137	5	ENSP00000374069,ENSP00000387114,ENSP00000374064,ENSP00000374067,ENSP00000385464	2	2	3	0.00010986	0.000157101	0.00699383	11487906
ENSP00000387119	ENSG00000105928	DFNA5	deafness, autosomal dominant 5 [Source:HGNC Symbol;Acc:HGNC:2810]	yes	0.10542168674698796	6	ENSP00000386670,ENSP00000387119,ENSP00000339587,ENSP00000401332,ENSP00000389874,ENSP00000398445	2	2	2	0.00367683	0.0031314	0.0766336	129821
ENSP00000387183	ENSG00000186854	TRABD2A	TraB domain containing 2A [Source:HGNC Symbol;Acc:HGNC:27013]	yes	0.18018018018018017	4	ENSP00000335004,ENSP00000387183,ENSP00000387075,ENSP00000476820	4	5	11	2.02795e-10	0.000157101	0.00699383	3641594915
ENSP00000387189	ENSG00000103363	TCEB2	transcription elongation factor B (SIII), polypeptide 2 (18kDa, elongin B) [Source:HGNC Symbol;Acc:HGNC:11619]	yes	0.18584070796460178	5	ENSP00000387189,ENSP00000262306,ENSP00000458443,ENSP00000386652,ENSP00000458213	2	2	12	7.67034e-05	0.000460765	0.0172042	4.07402e+06
ENSP00000387242	ENSG00000135916	ITM2C	integral membrane protein 2C [Source:HGNC Symbol;Acc:HGNC:6175]	yes	0.2048780487804878	8	ENSP00000440295,ENSP00000322100,ENSP00000403257,ENSP00000322730,ENSP00000390655,ENSP00000387242,ENSP00000444899,ENSP00000335121	3	3	5	2.62858e-08	0.000157101	0.00699383	1.72128e+09
ENSP00000387452	ENSG00000229496	DDX39B	DEAD (Asp-Glu-Ala-Asp) box polypeptide 39B [Source:HGNC Symbol;Acc:HGNC:13917]	yes	0.17647058823529413	39	ENSP00000387994,ENSP00000383152,ENSP00000400326,ENSP00000412609,ENSP00000411853,ENSP00000373000,ENSP00000387452,ENSP00000396021,ENSP00000407427,ENSP00000383151,ENSP00000379475,ENSP00000407647,ENSP00000399030,ENSP00000242776,ENSP00000411136,ENSP00000394160,ENSP00000392644,ENSP00000416269,ENSP00000406348,ENSP00000404228,ENSP00000415802,ENSP00000407419,ENSP00000406422,ENSP00000388880,ENSP00000393712…	2	2	3	2.69431e-08	0.000157101	0.00699383	1.65095e+06
ENSP00000388108	ENSG00000206290	COL11A2	collagen, type XI, alpha 2 [Source:HGNC Symbol;Acc:HGNC:2187]	yes	0.17717717717717718	21	ENSP00000355123,ENSP00000388309,ENSP00000404513,ENSP00000339915,ENSP00000372706,ENSP00000447062,ENSP00000449275,ENSP00000448931,ENSP00000402987,ENSP00000448701,ENSP00000447864,ENSP00000450084,ENSP00000449320,ENSP00000408123,ENSP00000446870,ENSP00000448715,ENSP00000388108,ENSP00000372565,ENSP00000408627,ENSP00000450046,ENSP00000363840	3	3	13	1.38133e-20	0.000157101	0.00699383	361031364
ENSP00000388131	ENSG00000239998	LILRA2	leukocyte immunoglobulin-like receptor, subfamily A (with TM domain), member 2 [Source:HGNC Symbol;Acc:HGNC:6603]	yes	0.027522935779816515	18	ENSP00000480939,ENSP00000478991,ENSP00000484762,ENSP00000479743,ENSP00000479769,ENSP00000483906,ENSP00000487398,ENSP00000479914,ENSP00000251377,ENSP00000251376,ENSP00000481338,ENSP00000479801,ENSP00000375618,ENSP00000375617,ENSP00000388131,ENSP00000480179,ENSP00000478981,ENSP00000477712	1	1	2	0.0753888	0.00614045	0.134115	7125749
ENSP00000388199	ENSG00000204577	LILRB3	leukocyte immunoglobulin-like receptor, subfamily B (with TM and ITIM domains), member 3 [Source:HGNC Symbol;Acc:HGNC:6607]	yes	0.056962025316455694	35	ENSP00000481047,ENSP00000484396,ENSP00000483257,ENSP00000483616,ENSP00000484821,ENSP00000481288,ENSP00000245621,ENSP00000416920,ENSP00000375615,ENSP00000245620,ENSP00000481019,ENSP00000388199,ENSP00000484543,ENSP00000379651,ENSP00000477915,ENSP00000484399,ENSP00000345184,ENSP00000478772,ENSP00000482776,ENSP00000480356,ENSP00000484822,ENSP00000480190,ENSP00000375630,ENSP00000480236,ENSP00000411227…	1	1	4	0.0266108	0.00235474	0.0608439	146112412
ENSP00000389207	ENSG00000232339	NOTCH4	notch 4 [Source:HGNC Symbol;Acc:HGNC:7884]	yes	0.05044955044955045	7	ENSP00000408335,ENSP00000364163,ENSP00000403447,ENSP00000410674,ENSP00000389207,ENSP00000372751,ENSP00000401321	2	6	18	1.26464e-07	0.000157101	0.00699383	23518308
ENSP00000389563	ENSG00000116750	UCHL5	ubiquitin carboxyl-terminal hydrolase L5 [Source:HGNC Symbol;Acc:HGNC:19678]	yes	0.17054263565891473	11	ENSP00000356424,ENSP00000402847,ENSP00000356421,ENSP00000356419,ENSP00000389563,ENSP00000356425,ENSP00000392416,ENSP00000408720,ENSP00000356418,ENSP00000391153,ENSP00000356420	4	4	7	0.0264067	0.00912014	0.185002	1.97288e+07
ENSP00000390673	ENSG00000231945	VARS	valyl-tRNA synthetase [Source:HGNC Symbol;Acc:HGNC:12651]	yes	0.02028740490278952	6	ENSP00000415316,ENSP00000211402,ENSP00000401121,ENSP00000403359,ENSP00000364815,ENSP00000390673	2	2	2	0.00359303	0.000460765	0.0172042	5309474
ENSP00000391566	ENSG00000075568	TMEM131	transmembrane protein 131 [Source:HGNC Symbol;Acc:HGNC:30366]	yes	0.04216867469879518	2	ENSP00000186436,ENSP00000391566	1	1	1	0.00256388	0.000460765	0.0172042	NA
ENSP00000392196	ENSG00000062524	LTK	leukocyte receptor tyrosine kinase [Source:HGNC Symbol;Acc:HGNC:6721]	yes	0.021798365122615803	3	ENSP00000347293,ENSP00000263800,ENSP00000392196	1	1	2	0.00533232	0.000755242	0.0250629	NA
ENSP00000392577	ENSG00000117758	STX12	syntaxin 12 [Source:HGNC Symbol;Acc:HGNC:11430]	yes	0.06976744186046512	2	ENSP00000392577,ENSP00000363054	1	1	3	7.25607e-06	0.000157101	0.00699383	4.04642e+06
ENSP00000392718	ENSG00000196834	POTEI	POTE ankyrin domain family, member I [Source:HGNC Symbol;Acc:HGNC:37093]	yes	0.053023255813953486	37	ENSP00000402373,ENSP00000349960,ENSP00000458435,ENSP00000410706,ENSP00000461407,ENSP00000466346,ENSP00000392718,ENSP00000355645,ENSP00000460660,ENSP00000224784,ENSP00000401032,ENSP00000462823,ENSP00000331514,ENSP00000399487,ENSP00000387182,ENSP00000386929,ENSP00000409264,ENSP00000459119,ENSP00000396730,ENSP00000398239,ENSP00000460464,ENSP00000407473,ENSP00000459124,ENSP00000350052,ENSP00000393951…	3	6	122	5.54708e-06	0.000460765	0.0172042	4.23101e+07
ENSP00000392880	ENSG00000229074	HLA-DRB1	major histocompatibility complex, class II, DR beta 1 [Source:HGNC Symbol;Acc:HGNC:4948]	yes	0.036	21	ENSP00000392880,ENSP00000482190,ENSP00000478963,ENSP00000484448,ENSP00000482905,ENSP00000302517,ENSP00000478579,ENSP00000479426,ENSP00000416022,ENSP00000483060,ENSP00000409322,ENSP00000405960,ENSP00000403458,ENSP00000481636,ENSP00000372607,ENSP00000446833,ENSP00000482007,ENSP00000484667,ENSP00000364114,ENSP00000482266,ENSP00000408795	1	1	5	0.0279392	0.00235474	0.0608439	1.14399e+07
ENSP00000392944	ENSG00000172432	GTPBP2	GTP binding protein 2 [Source:HGNC Symbol;Acc:HGNC:4670]	yes	0.0915032679738562	4	ENSP00000304893,ENSP00000392944,ENSP00000398905,ENSP00000303997	1	1	1	0.00014457	0.000157101	0.00699383	NA
ENSP00000393861	ENSG00000152642	GPD1L	glycerol-3-phosphate dehydrogenase 1-like [Source:HGNC Symbol;Acc:HGNC:28956]	yes	0.078125	3	ENSP00000282541,ENSP00000393861,ENSP00000416518	1	1	2	0.0426997	0.0031314	0.0766336	4263523
ENSP00000394066	ENSG00000102309	PIN4	peptidylprolyl cis/trans isomerase, NIMA-interacting 4 [Source:HGNC Symbol;Acc:HGNC:8992]	yes	0.13186813186813187	6	ENSP00000402330,ENSP00000394066,ENSP00000409154,ENSP00000218432,ENSP00000362773,ENSP00000421676	1	1	4	3.26923e-05	0.000157101	0.00699383	3254081
ENSP00000394216	ENSG00000122133	PAEP	progestagen-associated endometrial protein [Source:HGNC Symbol;Acc:HGNC:8573]	yes	0.16030534351145037	8	ENSP00000484659,ENSP00000401933,ENSP00000417898,ENSP00000360831,ENSP00000431712,ENSP00000277508,ENSP00000404033,ENSP00000394216	2	2	29	0.000280627	0.000460765	0.0172042	4.91619e+07
ENSP00000394447	ENSG00000224650	IGHV3-74	immunoglobulin heavy variable 3-74 [Source:HGNC Symbol;Acc:HGNC:5624]	yes	0.2222222222222222	14	ENSP00000394447,ENSP00000375033,ENSP00000375041,ENSP00000479328,ENSP00000483165,ENSP00000375010,ENSP00000375007,ENSP00000375016,ENSP00000479178,ENSP00000375024,ENSP00000483889,ENSP00000375036,ENSP00000478845,ENSP00000484861	1	2	115	8.75356e-05	0.000157101	0.00699383	5511149
ENSP00000394902	ENSG00000151923	TIAL1	TIA1 cytotoxic granule-associated RNA binding protein-like 1 [Source:HGNC Symbol;Acc:HGNC:11804]	yes	0.029333333333333333	2	ENSP00000358089,ENSP00000394902	1	1	1	0.000103471	0.000157101	0.00699383	1428754
ENSP00000395263	ENSG00000128534	LSM8	LSM8 homolog, U6 small nuclear RNA associated (S. cerevisiae) [Source:HGNC Symbol;Acc:HGNC:20471]	yes	0.23880597014925373	4	ENSP00000395263,ENSP00000408267,ENSP00000249299,ENSP00000403811	1	1	2	2.29668e-05	0.000157101	0.00699383	NA
ENSP00000396764	ENSG00000117419	ERI3	ERI1 exoribonuclease family member 3 [Source:HGNC Symbol;Acc:HGNC:17276]	yes	0.05113636363636364	5	ENSP00000390710,ENSP00000361333,ENSP00000361331,ENSP00000396764,ENSP00000412291	1	1	3	0.0331207	0.00261622	0.0661527	95884915
ENSP00000398569	ENSG00000183527	PSMG1	proteasome (prosome, macropain) assembly chaperone 1 [Source:HGNC Symbol;Acc:HGNC:3043]	yes	0.31746031746031744	3	ENSP00000329915,ENSP00000398569,ENSP00000370286	1	1	1	0.00185696	0.000460765	0.0172042	NA
ENSP00000398803	ENSG00000104522	TSTA3	tissue specific transplantation antigen P35B [Source:HGNC Symbol;Acc:HGNC:12390]	yes	0.16822429906542055	7	ENSP00000437012,ENSP00000478042,ENSP00000436405,ENSP00000433331,ENSP00000431587,ENSP00000435386,ENSP00000398803	3	3	5	1.02995e-18	0.000157101	0.00699383	36326145
ENSP00000399153	ENSG00000206258	TNXB	tenascin XB [Source:HGNC Symbol;Acc:HGNC:11976]	yes	0.1961155850307911	17	ENSP00000372645,ENSP00000387561,ENSP00000447694,ENSP00000449211,ENSP00000406495,ENSP00000447841,ENSP00000448326,ENSP00000389677,ENSP00000387438,ENSP00000364393,ENSP00000483409,ENSP00000418248,ENSP00000393091,ENSP00000447829,ENSP00000480067,ENSP00000407685,ENSP00000399153	1	65	950	0.0114146	0.00101792	0.0312306	5.67734e+08
ENSP00000399444	ENSG00000110080	ST3GAL4	ST3 beta-galactoside alpha-2,3-sialyltransferase 4 [Source:HGNC Symbol;Acc:HGNC:10864]	yes	0.16149068322981366	13	ENSP00000436047,ENSP00000431170,ENSP00000433989,ENSP00000432424,ENSP00000227495,ENSP00000376437,ENSP00000432647,ENSP00000433318,ENSP00000434668,ENSP00000394354,ENSP00000434349,ENSP00000348451,ENSP00000399444	4	4	8	6.14159e-14	0.000157101	0.00699383	3.79366e+07
ENSP00000399768	ENSG00000099977	DDT	D-dopachrome tautomerase [Source:HGNC Symbol;Acc:HGNC:2732]	yes	0.19626168224299065	12	ENSP00000385714,ENSP00000486856,ENSP00000381386,ENSP00000486829,ENSP00000215770,ENSP00000384866,ENSP00000215773,ENSP00000481175,ENSP00000485690,ENSP00000486384,ENSP00000399768,ENSP00000479063	2	2	33	0.000173987	0.000460765	0.0172042	1.07157e+09
ENSP00000399826	ENSG00000232216	IGHV3-43	immunoglobulin heavy variable 3-43 [Source:HGNC Symbol;Acc:HGNC:5604]	yes	0.09322033898305085	1	ENSP00000399826	1	1	4	0.00014279	0.000157101	0.00699383	32780144
ENSP00000400157	ENSG00000237172	B3GNT9	UDP-GlcNAc:betaGal beta-1,3-N-acetylglucosaminyltransferase 9 [Source:HGNC Symbol;Acc:HGNC:28714]	yes	0.03980099502487562	1	ENSP00000400157	1	1	1	1.68495e-05	0.000157101	0.00699383	NA
ENSP00000400327	ENSG00000165194	PCDH19	protocadherin 19 [Source:HGNC Symbol;Acc:HGNC:14270]	yes	0.07545454545454545	3	ENSP00000362125,ENSP00000400327,ENSP00000255531	6	6	33	1.97812e-19	0.000157101	0.00699383	71745696
ENSP00000401732	ENSG00000086475	SEPHS1	selenophosphate synthetase 1 [Source:HGNC Symbol;Acc:HGNC:19685]	yes	0.07228915662650602	3	ENSP00000367877,ENSP00000367893,ENSP00000401732	1	1	1	0.000278753	0.000460765	0.0172042	NA
ENSP00000401751	ENSG00000093144	ECHDC1	ethylmalonyl-CoA decarboxylase 1 [Source:HGNC Symbol;Acc:HGNC:21489]	yes	0.14950166112956811	15	ENSP00000399233,ENSP00000404866,ENSP00000436703,ENSP00000401751,ENSP00000357278,ENSP00000435502,ENSP00000402492,ENSP00000434143,ENSP00000420711,ENSP00000357274,ENSP00000434908,ENSP00000433874,ENSP00000436585,ENSP00000435068,ENSP00000357272	3	3	5	6.05856e-09	0.000460765	0.0172042	2.54148e+06
ENSP00000402371	ENSG00000011600	TYROBP	TYRO protein tyrosine kinase binding protein [Source:HGNC Symbol;Acc:HGNC:12449]	yes	0.1485148514851485	5	ENSP00000402371,ENSP00000262629,ENSP00000468608,ENSP00000445332,ENSP00000468447	1	1	1	0.000271931	0.000460765	0.0172042	NA
ENSP00000403478	ENSG00000114812	VIPR1	vasoactive intestinal peptide receptor 1 [Source:HGNC Symbol;Acc:HGNC:12694]	yes	0.0730593607305936	2	ENSP00000403478,ENSP00000327246	1	1	1	0.00257984	0.000460765	0.0172042	161472
ENSP00000403575	ENSG00000235657	HLA-A	major histocompatibility complex, class I, A [Source:HGNC Symbol;Acc:HGNC:4931]	yes	0.22465753424657534	64	ENSP00000397962,ENSP00000448516,ENSP00000447635,ENSP00000393458,ENSP00000388724,ENSP00000366002,ENSP00000373114,ENSP00000448992,ENSP00000379873,ENSP00000403575,ENSP00000431347,ENSP00000408986,ENSP00000390225,ENSP00000480039,ENSP00000483385,ENSP00000432736,ENSP00000388208,ENSP00000404678,ENSP00000372975,ENSP00000482354,ENSP00000403624,ENSP00000416233,ENSP00000390282,ENSP00000449453,ENSP00000407494…	3	6	54	1.36337e-11	0.000157101	0.00699383	1.80022e+07
ENSP00000403925	ENSG00000154114	TBCEL	tubulin folding cofactor E-like [Source:HGNC Symbol;Acc:HGNC:28115]	yes	0.15330188679245282	3	ENSP00000403925,ENSP00000437184,ENSP00000436419	4	4	14	1.93142e-10	0.000157101	0.00699383	3.34264e+08
ENSP00000404676	ENSG00000164219	PGGT1B	protein geranylgeranyltransferase type I, beta subunit [Source:HGNC Symbol;Acc:HGNC:8895]	yes	0.09018567639257294	1	ENSP00000404676	2	2	6	0.0754088	0.00912014	0.185002	2.2744e+06
ENSP00000405670	ENSG00000147813	NAPRT	nicotinate phosphoribosyltransferase [Source:HGNC Symbol;Acc:HGNC:30450]	yes	0.23877551020408164	8	ENSP00000478911,ENSP00000405670,ENSP00000433245,ENSP00000401508,ENSP00000480017,ENSP00000437102,ENSP00000390949,ENSP00000341136	6	6	18	8.77057e-27	0.000157101	0.00699383	6.49958e+06
ENSP00000406537	ENSG00000132821	VSTM2L	V-set and transmembrane domain containing 2 like [Source:HGNC Symbol;Acc:HGNC:16096]	yes	0.08053691275167785	2	ENSP00000406537,ENSP00000362560	1	1	1	0.0583568	0.00391009	0.092069	385530
ENSP00000406661	ENSG00000122778	KIAA1549	KIAA1549 [Source:HGNC Symbol;Acc:HGNC:22219]	yes	0.00672182006204757	2	ENSP00000416040,ENSP00000406661	2	2	4	4.62609e-08	0.000157101	0.00699383	3.5727e+08
ENSP00000406861	ENSG00000184956	MUC6	mucin 6, oligomeric mucus/gel-forming [Source:HGNC Symbol;Acc:HGNC:7517]	yes	0.03444034440344403	5	ENSP00000480618,ENSP00000487059,ENSP00000481532,ENSP00000406861,ENSP00000486295	4	4	6	2.7378e-06	0.000157101	0.00699383	5679990
ENSP00000408070	ENSG00000099953	MMP11	matrix metallopeptidase 11 [Source:HGNC Symbol;Acc:HGNC:7157]	yes	0.12429378531073447	7	ENSP00000486551,ENSP00000409860,ENSP00000408070,ENSP00000215743,ENSP00000412107,ENSP00000483349,ENSP00000486195	4	4	8	1.86159e-06	0.000460765	0.0172042	8.96946e+07
ENSP00000409004	ENSG00000011009	LYPLA2	lysophospholipase II [Source:HGNC Symbol;Acc:HGNC:6738]	yes	0.1111111111111111	3	ENSP00000363625,ENSP00000363638,ENSP00000409004	1	1	2	4.2857e-06	0.000157101	0.00699383	5258594
ENSP00000409516	ENSG00000163788	SNRK	SNF related kinase [Source:HGNC Symbol;Acc:HGNC:30598]	yes	0.07871198568872988	4	ENSP00000401246,ENSP00000411375,ENSP00000409516,ENSP00000296088	3	3	15	0.0579389	0.00963463	0.193242	22389381
ENSP00000409654	ENSG00000103274	NUBP1	nucleotide binding protein 1 [Source:HGNC Symbol;Acc:HGNC:8041]	yes	0.05825242718446602	2	ENSP00000409654,ENSP00000283027	1	1	1	0.00395888	0.000460765	0.0172042	2959436
ENSP00000410046	ENSG00000227826		major histocompatibility complex, class II, DR beta 4 precursor [Source:RefSeq peptide;Acc:NP_068818]	yes	0.09774436090225563	3	ENSP00000412031,ENSP00000410046,ENSP00000410857	1	1	1	5.64241e-08	0.000157101	0.00699383	NA
ENSP00000410707	ENSG00000120526	NUDCD1	NudC domain containing 1 [Source:HGNC Symbol;Acc:HGNC:24306]	yes	0.0776173285198556	2	ENSP00000239690,ENSP00000410707	3	3	5	0.000128366	0.00101792	0.0312306	3139756
ENSP00000410815	ENSG00000244255		Uncharacterized protein; cDNA FLJ55673, highly similar to Complement factor B (EC 3.4.21.47) [Source:UniProtKB/TrEMBL;Acc:B4E1Z4]	yes	0.49921011058451814	81	ENSP00000413351,ENSP00000398098,ENSP00000392322,ENSP00000389604,ENSP00000400097,ENSP00000388352,ENSP00000391314,ENSP00000416484,ENSP00000447632,ENSP00000413995,ENSP00000372853,ENSP00000364660,ENSP00000382862,ENSP00000391902,ENSP00000483004,ENSP00000387374,ENSP00000483231,ENSP00000419048,ENSP00000406190,ENSP00000416938,ENSP00000448602,ENSP00000396369,ENSP00000413295,ENSP00000446639,ENSP00000411298…	2	91	7670	3.11922e-16	0.000157101	0.00699383	11130295808
ENSP00000410910	ENSG00000272573	MUSTN1	musculoskeletal, embryonic nuclear protein 1 [Source:HGNC Symbol;Acc:HGNC:22144]	yes	0.18292682926829268	4	ENSP00000422941,ENSP00000410910,ENSP00000422253,ENSP00000419877	1	1	2	1.1619e-05	0.000157101	0.00699383	110498664
ENSP00000411186	ENSG00000197713	RPE	ribulose-5-phosphate-3-epimerase [Source:HGNC Symbol;Acc:HGNC:10293]	yes	0.2094240837696335	14	ENSP00000386194,ENSP00000352401,ENSP00000397674,ENSP00000394455,ENSP00000402061,ENSP00000346501,ENSP00000403808,ENSP00000392279,ENSP00000401838,ENSP00000389411,ENSP00000405695,ENSP00000411186,ENSP00000400449,ENSP00000411405	2	2	7	5.94826e-12	0.000157101	0.00699383	4.03475e+08
ENSP00000411497	ENSG00000184792	OSBP2	oxysterol binding protein 2 [Source:HGNC Symbol;Acc:HGNC:8504]	yes	0.44	13	ENSP00000409011,ENSP00000385254,ENSP00000409838,ENSP00000332576,ENSP00000415274,ENSP00000411052,ENSP00000401776,ENSP00000411497,ENSP00000389200,ENSP00000392080,ENSP00000384213,ENSP00000385237,ENSP00000388575	1	1	1	0.00848575	0.00101792	0.0312306	1135440
ENSP00000412436	ENSG00000231887	PRH1	proline-rich protein HaeIII subfamily 1 [Source:HGNC Symbol;Acc:HGNC:9366]	yes	0.5301204819277109	13	ENSP00000412436,ENSP00000483458,ENSP00000479168,ENSP00000482961,ENSP00000371271,ENSP00000481810,ENSP00000461041,ENSP00000479778,ENSP00000482068,ENSP00000458690,ENSP00000482363,ENSP00000481761,ENSP00000379682	1	2	6	0.00132032	0.000460765	0.0172042	3.65457e+06
ENSP00000412509	ENSG00000164054	SHISA5	shisa family member 5 [Source:HGNC Symbol;Acc:HGNC:30376]	yes	0.25892857142857145	7	ENSP00000484992,ENSP00000395373,ENSP00000412811,ENSP00000408223,ENSP00000296444,ENSP00000412509,ENSP00000407957	1	1	2	2.35133e-09	0.000157101	0.00699383	7722228
ENSP00000412763	ENSG00000204740	MALRD1	MAM and LDL receptor class A domain containing 1 [Source:HGNC Symbol;Acc:HGNC:24331]	yes	0.038033395176252316	3	ENSP00000366476,ENSP00000366477,ENSP00000412763	6	6	10	1.04856e-09	0.000460765	0.0172042	2.52898e+07
ENSP00000412953	ENSG00000163864	NMNAT3	nicotinamide nucleotide adenylyltransferase 3 [Source:HGNC Symbol;Acc:HGNC:20989]	yes	0.07975460122699386	4	ENSP00000296202,ENSP00000384319,ENSP00000412953,ENSP00000340523	1	1	1	0.00520166	0.000460765	0.0172042	NA
ENSP00000413006	ENSG00000189068	VSTM1	V-set and transmembrane domain containing 1 [Source:HGNC Symbol;Acc:HGNC:29455]	yes	0.13986013986013987	32	ENSP00000482555,ENSP00000480873,ENSP00000483797,ENSP00000480383,ENSP00000484844,ENSP00000484699,ENSP00000483798,ENSP00000484886,ENSP00000479198,ENSP00000481140,ENSP00000482726,ENSP00000413006,ENSP00000480533,ENSP00000478333,ENSP00000479748,ENSP00000483412,ENSP00000479448,ENSP00000482869,ENSP00000483411,ENSP00000484653,ENSP00000482985,ENSP00000483104,ENSP00000401926,ENSP00000481977,ENSP00000480547…	1	1	10	4.95413e-08	0.000157101	0.00699383	49397592
ENSP00000413359	ENSG00000086289	EPDR1	ependymin related 1 [Source:HGNC Symbol;Acc:HGNC:17572]	yes	0.18404907975460122	3	ENSP00000425858,ENSP00000199448,ENSP00000413359	2	2	2	0.0032457	0.000755242	0.0250629	22036578
ENSP00000413715	ENSG00000104974	LILRA1	leukocyte immunoglobulin-like receptor, subfamily A (with TM domain), member 1 [Source:HGNC Symbol;Acc:HGNC:6602]	yes	0.05190311418685121	12	ENSP00000480299,ENSP00000483224,ENSP00000484160,ENSP00000478666,ENSP00000481162,ENSP00000479482,ENSP00000413715,ENSP00000477637,ENSP00000487229,ENSP00000487011,ENSP00000251372,ENSP00000479343	1	1	5	0.000128519	0.000157101	0.00699383	3.98217e+07
ENSP00000414063	ENSG00000233841	HLA-C	major histocompatibility complex, class I, C [Source:HGNC Symbol;Acc:HGNC:4933]	yes	0.25136612021857924	97	ENSP00000447635,ENSP00000402694,ENSP00000397962,ENSP00000390851,ENSP00000366002,ENSP00000406366,ENSP00000415025,ENSP00000373091,ENSP00000379873,ENSP00000433088,ENSP00000416233,ENSP00000431347,ENSP00000398169,ENSP00000413189,ENSP00000391738,ENSP00000432736,ENSP00000433409,ENSP00000388208,ENSP00000449453,ENSP00000407494,ENSP00000394889,ENSP00000480331,ENSP00000365412,ENSP00000403922,ENSP00000366018…	2	9	89	2.39516e-08	0.000157101	0.00699383	191211470
ENSP00000414202	ENSG00000105063	PPP6R1	protein phosphatase 6, regulatory subunit 1 [Source:HGNC Symbol;Acc:HGNC:29195]	yes	0.02043132803632236	2	ENSP00000414202,ENSP00000467521	1	1	4	5.07518e-05	0.000157101	0.00699383	4157230
ENSP00000414464	ENSG00000122884	P4HA1	prolyl 4-hydroxylase, alpha polypeptide I [Source:HGNC Symbol;Acc:HGNC:8546]	yes	0.09883720930232558	5	ENSP00000414464,ENSP00000378353,ENSP00000263556,ENSP00000307318,ENSP00000362099	4	4	12	2.37081e-14	0.000157101	0.00699383	2.0241e+07
ENSP00000414999	ENSG00000136824	SMC2	structural maintenance of chromosomes 2 [Source:HGNC Symbol;Acc:HGNC:14011]	yes	0.13793103448275862	4	ENSP00000414999,ENSP00000363919,ENSP00000286398,ENSP00000363925	1	1	1	2.78291e-05	0.000157101	0.00699383	NA
ENSP00000416287	ENSG00000119414	PPP6C	protein phosphatase 6, catalytic subunit [Source:HGNC Symbol;Acc:HGNC:9323]	yes	0.12	4	ENSP00000416287,ENSP00000362648,ENSP00000411744,ENSP00000392147	1	1	1	2.58355e-05	0.000157101	0.00699383	53603
ENSP00000416420	ENSG00000101413	RPRD1B	regulation of nuclear pre-mRNA domain containing 1B [Source:HGNC Symbol;Acc:HGNC:16209]	yes	0.08121827411167512	2	ENSP00000416420,ENSP00000362532	1	1	2	2.78291e-05	0.000157101	0.00699383	5.87846e+06
ENSP00000417295	ENSG00000144837	PLA1A	phospholipase A1 member A [Source:HGNC Symbol;Acc:HGNC:17661]	yes	0.09821428571428571	5	ENSP00000418793,ENSP00000417295,ENSP00000420625,ENSP00000273371,ENSP00000417326	1	1	2	4.58792e-06	0.000157101	0.00699383	5549776
ENSP00000417443	ENSG00000158604	TMED4	transmembrane emp24 protein transport domain containing 4 [Source:HGNC Symbol;Acc:HGNC:22301]	yes	0.05913978494623656	2	ENSP00000417443,ENSP00000404042	1	1	3	0.00880654	0.00101792	0.0312306	2.36767e+06
ENSP00000417583	ENSG00000117069	ST6GALNAC5	ST6 (alpha-N-acetyl-neuraminyl-2,3-beta-galactosyl-1,3)-N-acetylgalactosaminide alpha-2,6-sialyltransferase 5 [Source:HGNC Symbol;Acc:HGNC:19342]	yes	0.10119047619047619	2	ENSP00000436263,ENSP00000417583	3	3	7	1.3002e-06	0.000157101	0.00699383	5.76904e+06
ENSP00000417958	ENSG00000121578	B4GALT4	UDP-Gal:betaGlcNAc beta 1,4- galactosyltransferase, polypeptide 4 [Source:HGNC Symbol;Acc:HGNC:927]	yes	0.15254237288135594	7	ENSP00000352144,ENSP00000417226,ENSP00000417188,ENSP00000377360,ENSP00000420665,ENSP00000420161,ENSP00000417958	1	1	1	3.39303e-05	0.000157101	0.00699383	NA
ENSP00000418138	ENSG00000243238	IGKV2-30	immunoglobulin kappa variable 2-30 [Source:HGNC Symbol;Acc:HGNC:5785]	yes	0.16666666666666666	12	ENSP00000393492,ENSP00000419353,ENSP00000418138,ENSP00000409413,ENSP00000417637,ENSP00000483585,ENSP00000374803,ENSP00000418948,ENSP00000483567,ENSP00000480029,ENSP00000452747,ENSP00000452662	1	2	3	0.0461788	0.0031314	0.0766336	1862632
ENSP00000418287	ENSG00000144021	CIAO1	cytosolic iron-sulfur assembly component 1 [Source:HGNC Symbol;Acc:HGNC:14280]	yes	0.05604719764011799	1	ENSP00000418287	1	1	1	0.000406746	0.000460765	0.0172042	26179986
ENSP00000418447	ENSG00000113575	PPP2CA	protein phosphatase 2, catalytic subunit, alpha isozyme [Source:HGNC Symbol;Acc:HGNC:9299]	yes	0.13592233009708737	13	ENSP00000279387,ENSP00000457915,ENSP00000430774,ENSP00000428816,ENSP00000429927,ENSP00000221138,ENSP00000430758,ENSP00000457089,ENSP00000418447,ENSP00000455995,ENSP00000428618,ENSP00000428866,ENSP00000430869	4	4	5	1.64799e-10	0.000157101	0.00699383	8.11974e+06
ENSP00000418659	ENSG00000112514	CUTA	cutA divalent cation tolerance homolog (E. coli) [Source:HGNC Symbol;Acc:HGNC:21101]	yes	0.1037037037037037	10	ENSP00000363624,ENSP00000475963,ENSP00000432744,ENSP00000400114,ENSP00000480360,ENSP00000391509,ENSP00000417544,ENSP00000403268,ENSP00000363620,ENSP00000418659	2	2	18	1.37008e-06	0.000460765	0.0172042	3.14847e+07
ENSP00000419311	ENSG00000080845	DLGAP4	discs, large (Drosophila) homolog-associated protein 4 [Source:HGNC Symbol;Acc:HGNC:24476]	yes	0.045081967213114756	7	ENSP00000345700,ENSP00000363014,ENSP00000419311,ENSP00000363023,ENSP00000477723,ENSP00000341633,ENSP00000384954	1	1	1	0.0499337	0.0031314	0.0766336	1149668
ENSP00000419354	ENSG00000152952	PLOD2	procollagen-lysine, 2-oxoglutarate 5-dioxygenase 2 [Source:HGNC Symbol;Acc:HGNC:9082]	yes	0.06220095693779904	4	ENSP00000282903,ENSP00000420094,ENSP00000353170,ENSP00000419354	2	2	2	0.000471919	0.00101792	0.0312306	NA
ENSP00000419945	ENSG00000242950	ERVW-1	endogenous retrovirus group W, member 1 [Source:HGNC Symbol;Acc:HGNC:13525]	yes	0.04275092936802974	2	ENSP00000419945,ENSP00000474984	1	1	2	4.85383e-09	0.000157101	0.00699383	55209919
ENSP00000420067	ENSG00000082996	RNF13	ring finger protein 13 [Source:HGNC Symbol;Acc:HGNC:10057]	yes	0.06956521739130435	7	ENSP00000417655,ENSP00000419069,ENSP00000341361,ENSP00000417294,ENSP00000376628,ENSP00000420124,ENSP00000420067	1	1	3	0.0295114	0.00261622	0.0661527	173931584
ENSP00000420354	ENSG00000163590	PPM1L	protein phosphatase, Mg2+/Mn2+ dependent, 1L [Source:HGNC Symbol;Acc:HGNC:16381]	yes	0.06701030927835051	2	ENSP00000420354,ENSP00000417659	1	1	6	0.000384689	0.000460765	0.0172042	9136440
ENSP00000420559	ENSG00000010704	HFE	hemochromatosis [Source:HGNC Symbol;Acc:HGNC:4886]	yes	0.056910569105691054	7	ENSP00000419725,ENSP00000311698,ENSP00000259699,ENSP00000420802,ENSP00000380217,ENSP00000420559,ENSP00000417404	1	1	1	0.00149464	0.000460765	0.0172042	4296798
ENSP00000420598	ENSG00000080224	EPHA6	EPH receptor A6 [Source:HGNC Symbol;Acc:HGNC:19296]	yes	0.043875685557586835	3	ENSP00000374323,ENSP00000420598,ENSP00000425132	2	2	8	7.85923e-06	0.000460765	0.0172042	4.20256e+07
ENSP00000420626	ENSG00000174840	PDE12	phosphodiesterase 12 [Source:HGNC Symbol;Acc:HGNC:25386]	yes	0.029661016949152543	2	ENSP00000420626,ENSP00000309142	1	1	2	1.95503e-05	0.000157101	0.00699383	12922299
ENSP00000420674	ENSG00000112640	PPP2R5D	protein phosphatase 2, regulatory subunit B', delta [Source:HGNC Symbol;Acc:HGNC:9312]	yes	0.04838709677419355	6	ENSP00000377669,ENSP00000417963,ENSP00000420674,ENSP00000419756,ENSP00000420550,ENSP00000420529	2	2	7	1.89612e-07	0.000460765	0.0172042	2.12054e+06
ENSP00000421035	ENSG00000248672	LY75-CD302	LY75-CD302 readthrough [Source:HGNC Symbol;Acc:HGNC:38828]	yes	0.10787011557512383	6	ENSP00000451446,ENSP00000263636,ENSP00000423463,ENSP00000259053,ENSP00000421035,ENSP00000394301	14	14	57	6.91379e-48	0.000157101	0.00699383	1.30988e+08
ENSP00000421082	ENSG00000051596	THOC3	THO complex 3 [Source:HGNC Symbol;Acc:HGNC:19072]	yes	0.0761904761904762	4	ENSP00000421082,ENSP00000422243,ENSP00000265097,ENSP00000487428	1	1	16	0.0689675	0.00495717	0.112156	42854142
ENSP00000421600	ENSG00000175426	PCSK1	proprotein convertase subtilisin/kexin type 1 [Source:HGNC Symbol;Acc:HGNC:8743]	yes	0.05807365439093484	2	ENSP00000308024,ENSP00000421600	3	3	5	1.79433e-05	0.000460765	0.0172042	1.78624e+06
ENSP00000421743	ENSG00000170891	CYTL1	cytokine-like 1 [Source:HGNC Symbol;Acc:HGNC:24435]	yes	0.17391304347826086	2	ENSP00000421743,ENSP00000303550	1	1	3	5.60395e-05	0.000157101	0.00699383	3.35107e+06
ENSP00000421986	ENSG00000221878	PSG7	pregnancy specific beta-1-glycoprotein 7 (gene/pseudogene) [Source:HGNC Symbol;Acc:HGNC:9524]	yes	0.15035799522673032	22	ENSP00000471124,ENSP00000472284,ENSP00000470412,ENSP00000478484,ENSP00000244296,ENSP00000472423,ENSP00000421986,ENSP00000481887,ENSP00000468936,ENSP00000384770,ENSP00000270077,ENSP00000480223,ENSP00000470856,ENSP00000292125,ENSP00000485117,ENSP00000187910,ENSP00000385386,ENSP00000472610,ENSP00000332215,ENSP00000480429,ENSP00000308970,ENSP00000413041	2	4	26	0.00190032	0.000755242	0.0250629	15103243264
ENSP00000422044	ENSG00000168743	NPNT	nephronectin [Source:HGNC Symbol;Acc:HGNC:27405]	yes	0.048507462686567165	8	ENSP00000389252,ENSP00000427507,ENSP00000302557,ENSP00000422474,ENSP00000422044,ENSP00000426146,ENSP00000369323,ENSP00000402884	2	2	4	1.13843e-06	0.000460765	0.0172042	7474994
ENSP00000423427	ENSG00000124795	DEK	DEK proto-oncogene [Source:HGNC Symbol;Acc:HGNC:2768]	yes	0.08333333333333333	4	ENSP00000380414,ENSP00000423427,ENSP00000421165,ENSP00000244776	1	1	1	0.00158042	0.000460765	0.0172042	13763362
ENSP00000423604	ENSG00000172901	LVRN	laeverin [Source:HGNC Symbol;Acc:HGNC:26904]	yes	0.017118402282453638	3	ENSP00000350541,ENSP00000378899,ENSP00000423604	1	1	1	0.0146037	0.00101792	0.0312306	4150214
ENSP00000424120	ENSG00000150471	ADGRL3	adhesion G protein-coupled receptor L3 [Source:HGNC Symbol;Acc:HGNC:20974]	yes	0.02761982128350934	15	ENSP00000422533,ENSP00000425201,ENSP00000425884,ENSP00000424030,ENSP00000420931,ENSP00000439831,ENSP00000424120,ENSP00000421476,ENSP00000424258,ENSP00000423388,ENSP00000421372,ENSP00000421627,ENSP00000423434,ENSP00000425033,ENSP00000423787	3	3	12	4.89983e-10	0.000157101	0.00699383	1.55943e+07
ENSP00000424813	ENSG00000114115	RBP1	retinol binding protein 1, cellular [Source:HGNC Symbol;Acc:HGNC:9919]	yes	0.13186813186813187	6	ENSP00000232219,ENSP00000429166,ENSP00000427492,ENSP00000482165,ENSP00000424813,ENSP00000477621	1	1	2	0.00083458	0.000460765	0.0172042	1.87805e+06
ENSP00000425274	ENSG00000123739	PLA2G12A	phospholipase A2, group XIIA [Source:HGNC Symbol;Acc:HGNC:18554]	yes	0.08021390374331551	2	ENSP00000425274,ENSP00000243501	1	1	1	0.00051791	0.000460765	0.0172042	11448971
ENSP00000425404	ENSG00000164106	SCRG1	stimulator of chondrogenesis 1 [Source:HGNC Symbol;Acc:HGNC:17036]	yes	0.1956521739130435	2	ENSP00000296506,ENSP00000425404	1	1	4	5.33644e-08	0.000157101	0.00699383	4.19396e+06
ENSP00000425467	ENSG00000096395	MLN	motilin [Source:HGNC Symbol;Acc:HGNC:7141]	yes	0.2037037037037037	3	ENSP00000388825,ENSP00000266003,ENSP00000425467	1	1	5	0.000394341	0.000460765	0.0172042	1.71136e+08
ENSP00000425510	ENSG00000167080	B4GALNT2	beta-1,4-N-acetyl-galactosaminyl transferase 2 [Source:HGNC Symbol;Acc:HGNC:24136]	yes	0.04583333333333333	3	ENSP00000300404,ENSP00000425510,ENSP00000377022	2	2	3	0.000432257	0.000460765	0.0172042	406649
ENSP00000426684	ENSG00000126545	CSN1S1	casein alpha s1 [Source:HGNC Symbol;Acc:HGNC:2445]	yes	0.09467455621301775	4	ENSP00000422611,ENSP00000246891,ENSP00000427490,ENSP00000426684	1	1	1	2.61575e-05	0.000157101	0.00699383	NA
ENSP00000426879	ENSG00000183876	ARSI	arylsulfatase family, member I [Source:HGNC Symbol;Acc:HGNC:32521]	yes	0.028169014084507043	2	ENSP00000333395,ENSP00000426879	1	1	1	0.00110306	0.000460765	0.0172042	NA
ENSP00000427463	ENSG00000129128	SPCS3	signal peptidase complex subunit 3 homolog (S. cerevisiae) [Source:HGNC Symbol;Acc:HGNC:26212]	yes	0.05	1	ENSP00000427463	1	1	1	0.0082273	0.00101792	0.0312306	4571216
ENSP00000428333	ENSG00000253873	PCDHGA11	protocadherin gamma subfamily A, 11 [Source:HGNC Symbol;Acc:HGNC:8698]	yes	0.032	7	ENSP00000477805,ENSP00000480917,ENSP00000481438,ENSP00000381589,ENSP00000428333,ENSP00000430024,ENSP00000252085	1	2	5	1.24383e-05	0.000157101	0.00699383	126521608
ENSP00000428376	ENSG00000135074	ADAM19	ADAM metallopeptidase domain 19 [Source:HGNC Symbol;Acc:HGNC:197]	yes	0.07720588235294118	3	ENSP00000257527,ENSP00000428654,ENSP00000428376	2	2	4	9.48469e-05	0.000460765	0.0172042	2391511
ENSP00000428841	ENSG00000134516	DOCK2	dedicator of cytokinesis 2 [Source:HGNC Symbol;Acc:HGNC:2988]	yes	0.10559006211180125	1	ENSP00000428841	1	1	15	0.0601281	0.00417403	0.0972401	1.86026e+06
ENSP00000428991	ENSG00000104419	NDRG1	N-myc downstream regulated 1 [Source:HGNC Symbol;Acc:HGNC:7679]	yes	0.18562874251497005	11	ENSP00000428345,ENSP00000429380,ENSP00000429524,ENSP00000429272,ENSP00000429994,ENSP00000428991,ENSP00000429172,ENSP00000429840,ENSP00000428384,ENSP00000319977,ENSP00000404854	3	3	10	4.44326e-07	0.000157101	0.00699383	141013072
ENSP00000429121	ENSG00000169439	SDC2	syndecan 2 [Source:HGNC Symbol;Acc:HGNC:10659]	yes	0.10948905109489052	6	ENSP00000429045,ENSP00000428256,ENSP00000427784,ENSP00000307046,ENSP00000429121,ENSP00000429662	2	2	5	6.04459e-10	0.000157101	0.00699383	2.5076e+07
ENSP00000429255	ENSG00000104490	NCALD	neurocalcin delta [Source:HGNC Symbol;Acc:HGNC:7655]	yes	0.08823529411764706	7	ENSP00000310587,ENSP00000220931,ENSP00000428105,ENSP00000429255,ENSP00000428781,ENSP00000379256,ENSP00000430476	1	1	2	0.00996518	0.00101792	0.0312306	NA
ENSP00000430347	ENSG00000170584	NUDCD2	NudC domain containing 2 [Source:HGNC Symbol;Acc:HGNC:30535]	yes	0.13636363636363635	2	ENSP00000430347,ENSP00000304854	1	1	2	5.01589e-08	0.000157101	0.00699383	3.25484e+07
ENSP00000430504	ENSG00000121005	CRISPLD1	cysteine-rich secretory protein LCCL domain containing 1 [Source:HGNC Symbol;Acc:HGNC:18206]	yes	0.11428571428571428	2	ENSP00000430504,ENSP00000262207	1	1	2	0.0186692	0.00101792	0.0312306	2.9922e+06
ENSP00000431373	ENSG00000135387	CAPRIN1	cell cycle associated protein 1 [Source:HGNC Symbol;Acc:HGNC:6743]	yes	0.05913978494623656	7	ENSP00000374296,ENSP00000483169,ENSP00000431581,ENSP00000340329,ENSP00000434204,ENSP00000434150,ENSP00000431373	1	1	1	0.0740607	0.00535184	0.119514	14469688
ENSP00000431482	ENSG00000255526	NEDD8-MDP1	NEDD8-MDP1 readthrough [Source:HGNC Symbol;Acc:HGNC:39551]	yes	0.22941176470588234	8	ENSP00000474249,ENSP00000432117,ENSP00000380040,ENSP00000288087,ENSP00000431482,ENSP00000250495,ENSP00000448192,ENSP00000380045	4	4	22	9.28365e-09	0.000157101	0.00699383	3.63888e+07
ENSP00000431664	ENSG00000142186	SCYL1	SCY1-like 1 (S. cerevisiae) [Source:HGNC Symbol;Acc:HGNC:14372]	yes	0.06857142857142857	8	ENSP00000431664,ENSP00000437254,ENSP00000431635,ENSP00000432175,ENSP00000270176,ENSP00000436993,ENSP00000279270,ENSP00000408192	1	1	1	0.0590592	0.00391009	0.092069	65483068
ENSP00000431690	ENSG00000110025	SNX15	sorting nexin 15 [Source:HGNC Symbol;Acc:HGNC:14978]	yes	0.046875	4	ENSP00000316410,ENSP00000437277,ENSP00000431690,ENSP00000366452	1	1	1	0.0594134	0.00391009	0.092069	12971146
ENSP00000431738	ENSG00000110075	PPP6R3	protein phosphatase 6, regulatory subunit 3 [Source:HGNC Symbol;Acc:HGNC:1173]	yes	0.09285714285714286	9	ENSP00000433058,ENSP00000377389,ENSP00000377390,ENSP00000431415,ENSP00000431738,ENSP00000437329,ENSP00000433565,ENSP00000265636,ENSP00000265637	1	1	2	0.0156254	0.00101792	0.0312306	488575
ENSP00000432008	ENSG00000177963	RIC8A	RIC8 guanine nucleotide exchange factor A [Source:HGNC Symbol;Acc:HGNC:29550]	yes	0.060263653483992465	4	ENSP00000432008,ENSP00000325941,ENSP00000436610,ENSP00000434833	2	2	5	6.32059e-07	0.000157101	0.00699383	3.5864e+06
ENSP00000432060	ENSG00000101811	CSTF2	cleavage stimulation factor, 3' pre-RNA, subunit 2, 64kDa [Source:HGNC Symbol;Acc:HGNC:2484]	yes	0.045662100456621	5	ENSP00000362063,ENSP00000432060,ENSP00000415705,ENSP00000387996,ENSP00000332444	2	2	3	0.0205369	0.00126687	0.0366317	8.53274e+06
ENSP00000432063	ENSG00000058085	LAMC2	laminin, gamma 2 [Source:HGNC Symbol;Acc:HGNC:6493]	yes	0.06480648064806481	2	ENSP00000432063,ENSP00000264144	5	5	17	2.19545e-10	0.000157101	0.00699383	3.40191e+07
ENSP00000432107	ENSG00000109854	HTATIP2	HIV-1 Tat interactive protein 2, 30kDa [Source:HGNC Symbol;Acc:HGNC:16637]	yes	0.15789473684210525	8	ENSP00000432107,ENSP00000432338,ENSP00000394259,ENSP00000397752,ENSP00000387876,ENSP00000436729,ENSP00000392985,ENSP00000436548	2	2	2	0.000503119	0.00126687	0.0366317	2126261
ENSP00000432304	ENSG00000143164	DCAF6	DDB1 and CUL4 associated factor 6 [Source:HGNC Symbol;Acc:HGNC:30002]	yes	0.019067796610169493	5	ENSP00000311949,ENSP00000356814,ENSP00000356817,ENSP00000432304,ENSP00000396238	1	1	1	0.0276011	0.00235474	0.0608439	328216
ENSP00000432475	ENSG00000134744	ZCCHC11	zinc finger, CCHC domain containing 11 [Source:HGNC Symbol;Acc:HGNC:28981]	yes	0.2926829268292683	1	ENSP00000432475	1	1	29	0.0267734	0.00235474	0.0608439	7.68802e+07
ENSP00000432586	ENSG00000165323	FAT3	FAT atypical cadherin 3 [Source:HGNC Symbol;Acc:HGNC:23112]	yes	0.01419238567244875	3	ENSP00000432586,ENSP00000387040,ENSP00000436399	3	3	3	0.00508319	0.00101792	0.0312306	5.82659e+06
ENSP00000433536	ENSG00000081237	PTPRC	protein tyrosine phosphatase, receptor type, C [Source:HGNC Symbol;Acc:HGNC:9666]	yes	0.13666666666666666	12	ENSP00000458846,ENSP00000461074,ENSP00000482203,ENSP00000356337,ENSP00000433536,ENSP00000306782,ENSP00000458322,ENSP00000411355,ENSP00000356349,ENSP00000469141,ENSP00000458662,ENSP00000461347	7	7	102	2.19947e-22	0.000157101	0.00699383	1.51878e+08
ENSP00000433902	ENSG00000172830	SSH3	slingshot protein phosphatase 3 [Source:HGNC Symbol;Acc:HGNC:30581]	yes	0.0593607305936073	5	ENSP00000365948,ENSP00000480198,ENSP00000433902,ENSP00000312081,ENSP00000431788	1	1	1	0.00137036	0.000460765	0.0172042	12872
ENSP00000434363	ENSG00000166257	SCN3B	sodium channel, voltage gated, type III beta subunit [Source:HGNC Symbol;Acc:HGNC:20665]	yes	0.08602150537634409	5	ENSP00000376523,ENSP00000432785,ENSP00000299333,ENSP00000435554,ENSP00000434363	1	1	3	0.0421877	0.0031314	0.0766336	NA
ENSP00000434890	ENSG00000175538	KCNE3	potassium channel, voltage gated subfamily E regulatory beta subunit 3 [Source:HGNC Symbol;Acc:HGNC:6243]	yes	0.28	5	ENSP00000434890,ENSP00000431739,ENSP00000433697,ENSP00000310557,ENSP00000433633	1	1	2	0.000540866	0.000460765	0.0172042	4744392
ENSP00000435326	ENSG00000164172	MOCS2	molybdenum cofactor synthesis 2 [Source:HGNC Symbol;Acc:HGNC:7193]	yes	0.13253012048192772	7	ENSP00000464663,ENSP00000462870,ENSP00000355160,ENSP00000424267,ENSP00000426274,ENSP00000435326,ENSP00000411022	1	1	1	0.0178849	0.00101792	0.0312306	NA
ENSP00000435508	ENSG00000182934	SRPR	signal recognition particle receptor (docking protein) [Source:HGNC Symbol;Acc:HGNC:11307]	yes	0.04918032786885246	2	ENSP00000435508,ENSP00000328023	2	2	2	0.00137585	0.000460765	0.0172042	1067498
ENSP00000435911	ENSG00000152061	RABGAP1L	RAB GTPase activating protein 1-like [Source:HGNC Symbol;Acc:HGNC:24663]	yes	0.08421052631578947	8	ENSP00000356661,ENSP00000435911,ENSP00000281844,ENSP00000318603,ENSP00000356660,ENSP00000362751,ENSP00000375916,ENSP00000420660	1	1	1	5.2025e-05	0.000157101	0.00699383	NA
ENSP00000436091	ENSG00000171960	PPIH	peptidylprolyl isomerase H (cyclophilin H) [Source:HGNC Symbol;Acc:HGNC:14651]	yes	0.09375	4	ENSP00000361630,ENSP00000402836,ENSP00000306614,ENSP00000436091	1	1	1	0.0546367	0.00338313	0.0815232	6053454
ENSP00000436136	ENSG00000068971	PPP2R5B	protein phosphatase 2, regulatory subunit B', beta [Source:HGNC Symbol;Acc:HGNC:9310]	yes	0.11711711711711711	3	ENSP00000436136,ENSP00000437088,ENSP00000164133	1	1	1	0.00310775	0.000460765	0.0172042	NA
ENSP00000436153	ENSG00000168658	VWA3B	von Willebrand factor A domain containing 3B [Source:HGNC Symbol;Acc:HGNC:28385]	yes	0.02627939142461964	2	ENSP00000436153,ENSP00000417955	1	1	1	0.0790414	0.00679095	0.145793	NA
ENSP00000436417	ENSG00000177225	PDDC1	Parkinson disease 7 domain containing 1 [Source:HGNC Symbol;Acc:HGNC:26616]	yes	0.11494252873563218	7	ENSP00000346239,ENSP00000436417,ENSP00000321691,ENSP00000437068,ENSP00000380612,ENSP00000434839,ENSP00000431183	1	1	1	0.0161129	0.00101792	0.0312306	NA
ENSP00000437136	ENSG00000166833	NAV2	neuron navigator 2 [Source:HGNC Symbol;Acc:HGNC:15997]	yes	0.03553921568627451	8	ENSP00000309577,ENSP00000379394,ENSP00000379396,ENSP00000437316,ENSP00000437136,ENSP00000353871,ENSP00000443489,ENSP00000435395	1	1	1	0.0173447	0.00101792	0.0312306	2888943
ENSP00000437141	ENSG00000021762	OSBPL5	oxysterol binding protein-like 5 [Source:HGNC Symbol;Acc:HGNC:16392]	yes	0.10510510510510511	6	ENSP00000263650,ENSP00000302872,ENSP00000374639,ENSP00000433342,ENSP00000431412,ENSP00000437141	1	1	3	0.0685585	0.00495717	0.112156	2.50443e+08
ENSP00000437172	ENSG00000172890	NADSYN1	NAD synthetase 1 [Source:HGNC Symbol;Acc:HGNC:29832]	yes	0.1342281879194631	3	ENSP00000437172,ENSP00000431820,ENSP00000326424	2	2	7	0.00773652	0.00101792	0.0312306	3629700734
ENSP00000437302	ENSG00000196735	HLA-DQA1	major histocompatibility complex, class II, DQ alpha 1 [Source:HGNC Symbol;Acc:HGNC:4942]	yes	0.0794392523364486	27	ENSP00000415001,ENSP00000405476,ENSP00000400695,ENSP00000401098,ENSP00000390725,ENSP00000448003,ENSP00000401436,ENSP00000378767,ENSP00000405833,ENSP00000412055,ENSP00000416641,ENSP00000393431,ENSP00000437302,ENSP00000449970,ENSP00000409127,ENSP00000339398,ENSP00000387768,ENSP00000483966,ENSP00000364087,ENSP00000401151,ENSP00000401760,ENSP00000387892,ENSP00000447668,ENSP00000446860,ENSP00000241802…	1	1	6	3.70272e-08	0.000157101	0.00699383	3322364
ENSP00000437458	ENSG00000125851	PCSK2	proprotein convertase subtilisin/kexin type 2 [Source:HGNC Symbol;Acc:HGNC:8744]	yes	0.06135986733001658	3	ENSP00000262545,ENSP00000437458,ENSP00000367131	3	3	9	9.99573e-09	0.000157101	0.00699383	23564135
ENSP00000438205	ENSG00000111261	MANSC1	MANSC domain containing 1 [Source:HGNC Symbol;Acc:HGNC:25505]	yes	0.11136890951276102	8	ENSP00000487587,ENSP00000445303,ENSP00000486216,ENSP00000487019,ENSP00000379638,ENSP00000437624,ENSP00000487244,ENSP00000438205	3	3	19	6.16773e-18	0.000157101	0.00699383	5.06858e+06
ENSP00000439505	ENSG00000100226	GTPBP1	GTP binding protein 1 [Source:HGNC Symbol;Acc:HGNC:4669]	yes	0.11627906976744186	3	ENSP00000216044,ENSP00000442881,ENSP00000439505	1	1	1	0.00807599	0.00101792	0.0312306	101430992
ENSP00000439877	ENSG00000175575	PAAF1	proteasomal ATPase-associated factor 1 [Source:HGNC Symbol;Acc:HGNC:25687]	yes	0.3416149068322981	12	ENSP00000439747,ENSP00000441333,ENSP00000438071,ENSP00000439877,ENSP00000311665,ENSP00000438789,ENSP00000438124,ENSP00000438894,ENSP00000439143,ENSP00000441494,ENSP00000365564,ENSP00000442434	2	2	3	0.0563285	0.00912014	0.185002	7345813
ENSP00000439903	ENSG00000198542	ITGBL1	integrin, beta-like 1 (with EGF-like repeat domains) [Source:HGNC Symbol;Acc:HGNC:6164]	yes	0.17847025495750707	6	ENSP00000365351,ENSP00000365332,ENSP00000439903,ENSP00000481065,ENSP00000475328,ENSP00000481484	4	4	11	5.48278e-17	0.000157101	0.00699383	1.58831e+08
ENSP00000440605	ENSG00000111726	CMAS	cytidine monophosphate N-acetylneuraminic acid synthetase [Source:HGNC Symbol;Acc:HGNC:18290]	yes	0.12371134020618557	3	ENSP00000446239,ENSP00000229329,ENSP00000440605	1	1	2	0.00838142	0.00101792	0.0312306	425107
ENSP00000440775	ENSG00000154240	CEP112	centrosomal protein 112kDa [Source:HGNC Symbol;Acc:HGNC:28514]	yes	0.013143483023001095	3	ENSP00000442784,ENSP00000376522,ENSP00000440775	1	1	2	0.091022	0.00756506	0.159009	8614629
ENSP00000442453	ENSG00000259040	BLOC1S5-TXNDC5	BLOC1S5-TXNDC5 readthrough (NMD candidate) [Source:HGNC Symbol;Acc:HGNC:42001]	yes	0.15555555555555556	3	ENSP00000442453,ENSP00000369081,ENSP00000420784	5	5	25	1.48021e-09	0.000460765	0.0172042	5.1328e+07
ENSP00000442472	ENSG00000070018	LRP6	low density lipoprotein receptor-related protein 6 [Source:HGNC Symbol;Acc:HGNC:6698]	yes	0.0784438775510204	8	ENSP00000442472,ENSP00000445083,ENSP00000487008,ENSP00000486315,ENSP00000436652,ENSP00000486524,ENSP00000261349,ENSP00000294304	9	12	43	1.09089e-21	0.000157101	0.00699383	1.43141e+09
ENSP00000442725	ENSG00000086065	CHMP5	charged multivesicular body protein 5 [Source:HGNC Symbol;Acc:HGNC:26942]	yes	0.13450292397660818	2	ENSP00000442725,ENSP00000223500	2	2	3	2.57257e-05	0.000157101	0.00699383	NA
ENSP00000442862	ENSG00000073060	SCARB1	scavenger receptor class B, member 1 [Source:HGNC Symbol;Acc:HGNC:1664]	yes	0.02494802494802495	5	ENSP00000343795,ENSP00000442862,ENSP00000414979,ENSP00000261693,ENSP00000444851	1	1	2	0.0176669	0.00101792	0.0312306	54095
ENSP00000443101	ENSG00000196296	ATP2A1	ATPase, Ca++ transporting, cardiac muscle, fast twitch 1 [Source:HGNC Symbol;Acc:HGNC:811]	yes	0.01726121979286536	5	ENSP00000349595,ENSP00000440045,ENSP00000378879,ENSP00000443101,ENSP00000311186	1	1	1	8.4342e-05	0.000157101	0.00699383	NA
ENSP00000443334	ENSG00000101892	ATP1B4	ATPase, Na+/K+ transporting, beta 4 polypeptide [Source:HGNC Symbol;Acc:HGNC:808]	yes	0.07643312101910828	3	ENSP00000355346,ENSP00000218008,ENSP00000443334	2	2	11	1.14694e-05	0.000460765	0.0172042	5.01286e+09
ENSP00000443589	ENSG00000063015	SEZ6	seizure related 6 homolog (mouse) [Source:HGNC Symbol;Acc:HGNC:15955]	yes	0.09923664122137404	7	ENSP00000337407,ENSP00000312942,ENSP00000440764,ENSP00000353440,ENSP00000443589,ENSP00000403784,ENSP00000437650	1	1	1	9.0289e-05	0.000157101	0.00699383	NA
ENSP00000443683	ENSG00000101638	ST8SIA5	ST8 alpha-N-acetyl-neuraminide alpha-2,8-sialyltransferase 5 [Source:HGNC Symbol;Acc:HGNC:17827]	yes	0.08985507246376812	3	ENSP00000321343,ENSP00000445492,ENSP00000443683	3	3	22	2.72787e-08	0.000157101	0.00699383	7.19399e+06
ENSP00000443752	ENSG00000156222	SLC28A1	solute carrier family 28 (concentrative nucleoside transporter), member 1 [Source:HGNC Symbol;Acc:HGNC:11001]	yes	0.041407867494824016	3	ENSP00000443752,ENSP00000378074,ENSP00000286749	1	1	1	0.000463258	0.000460765	0.0172042	NA
ENSP00000445004	ENSG00000111405	ENDOU	endonuclease, polyU-specific [Source:HGNC Symbol;Acc:HGNC:14369]	yes	0.11239193083573487	3	ENSP00000229003,ENSP00000445004,ENSP00000397679	2	2	3	1.93367e-10	0.000157101	0.00699383	4235130
ENSP00000445077	ENSG00000180574		Putative eukaryotic translation initiation factor 2 subunit 3-like protein [Source:UniProtKB/Swiss-Prot;Acc:Q2VIR3]	yes	0.125	4	ENSP00000391383,ENSP00000323063,ENSP00000253039,ENSP00000445077	4	4	8	2.02277e-07	0.000460765	0.0172042	3.94958e+07
ENSP00000445429	ENSG00000256269	HMBS	hydroxymethylbilane synthase [Source:HGNC Symbol;Acc:HGNC:4982]	yes	0.12121212121212122	20	ENSP00000445429,ENSP00000445599,ENSP00000486081,ENSP00000392041,ENSP00000376584,ENSP00000487456,ENSP00000486742,ENSP00000486199,ENSP00000486176,ENSP00000486122,ENSP00000486721,ENSP00000278715,ENSP00000486979,ENSP00000443058,ENSP00000487285,ENSP00000438424,ENSP00000486658,ENSP00000440092,ENSP00000444730,ENSP00000442079	3	3	5	3.58093e-14	0.000157101	0.00699383	4.16337e+06
ENSP00000445571	ENSG00000123989	CHPF	chondroitin polymerizing factor [Source:HGNC Symbol;Acc:HGNC:24291]	yes	0.048939641109298535	2	ENSP00000243776,ENSP00000445571	2	2	4	4.93557e-07	0.000157101	0.00699383	123395
ENSP00000446013	ENSG00000167987	VPS37C	vacuolar protein sorting 37 homolog C (S. cerevisiae) [Source:HGNC Symbol;Acc:HGNC:26097]	yes	0.1554054054054054	2	ENSP00000446013,ENSP00000301765	2	2	5	0.00102741	0.000460765	0.0172042	4.81268e+07
ENSP00000446318	ENSG00000127314	RAP1B	RAP1B, member of RAS oncogene family [Source:HGNC Symbol;Acc:HGNC:9857]	yes	0.23030303030303031	28	ENSP00000377085,ENSP00000444786,ENSP00000368270,ENSP00000446318,ENSP00000399986,ENSP00000445138,ENSP00000444924,ENSP00000444467,ENSP00000439966,ENSP00000401095,ENSP00000441275,ENSP00000250559,ENSP00000444060,ENSP00000348786,ENSP00000443775,ENSP00000437415,ENSP00000443851,ENSP00000358723,ENSP00000444830,ENSP00000440708,ENSP00000440466,ENSP00000440014,ENSP00000440635,ENSP00000396741,ENSP00000445090…	4	4	14	2.53852e-09	0.000460765	0.0172042	4726516
ENSP00000446637	ENSG00000167552	TUBA1A	tubulin, alpha 1a [Source:HGNC Symbol;Acc:HGNC:20766]	yes	0.12740384615384615	23	ENSP00000450268,ENSP00000382982,ENSP00000336799,ENSP00000482878,ENSP00000446613,ENSP00000301072,ENSP00000449748,ENSP00000449325,ENSP00000326042,ENSP00000449016,ENSP00000448725,ENSP00000448211,ENSP00000439020,ENSP00000248437,ENSP00000301071,ENSP00000375938,ENSP00000443475,ENSP00000448648,ENSP00000418799,ENSP00000369784,ENSP00000446637,ENSP00000449460,ENSP00000318197	3	5	19	6.67341e-11	0.000157101	0.00699383	2.93689e+07
ENSP00000447458	ENSG00000204364	C2	complement component 2 [Source:HGNC Symbol;Acc:HGNC:1248]	yes	0.573997233748271	72	ENSP00000398098,ENSP00000392322,ENSP00000411298,ENSP00000412289,ENSP00000400097,ENSP00000449823,ENSP00000416484,ENSP00000447632,ENSP00000413995,ENSP00000372853,ENSP00000364660,ENSP00000372850,ENSP00000483004,ENSP00000387374,ENSP00000483231,ENSP00000388286,ENSP00000449940,ENSP00000406190,ENSP00000416938,ENSP00000396369,ENSP00000446639,ENSP00000447134,ENSP00000418923,ENSP00000418996,ENSP00000419048…	18	54	2198	4.21203e-102	0.000157101	0.00699383	8524411648
ENSP00000447852	ENSG00000259075	POC1B-GALNT4	POC1B-GALNT4 readthrough [Source:HGNC Symbol;Acc:HGNC:42957]	yes	0.12869565217391304	3	ENSP00000436604,ENSP00000447852,ENSP00000355632	6	8	44	8.74994e-16	0.000157101	0.00699383	106627881
ENSP00000448536	ENSG00000235162	C12orf75	chromosome 12 open reading frame 75 [Source:HGNC Symbol;Acc:HGNC:35164]	yes	0.2222222222222222	2	ENSP00000448536,ENSP00000450095	2	2	4	8.6145e-07	0.000460765	0.0172042	2.82843e+07
ENSP00000448750	ENSG00000151239	TWF1	twinfilin actin-binding protein 1 [Source:HGNC Symbol;Acc:HGNC:9620]	yes	0.051587301587301584	3	ENSP00000448221,ENSP00000378886,ENSP00000448750	1	1	1	0.00778162	0.00101792	0.0312306	784002560
ENSP00000449780	ENSG00000167531	LALBA	lactalbumin, alpha- [Source:HGNC Symbol;Acc:HGNC:6480]	yes	0.07317073170731707	2	ENSP00000449780,ENSP00000301046	1	1	5	0.0642102	0.00443372	0.102239	5.24634e+06
ENSP00000450222	ENSG00000089157	RPLP0	ribosomal protein, large, P0 [Source:HGNC Symbol;Acc:HGNC:10371]	yes	0.22535211267605634	13	ENSP00000339027,ENSP00000450019,ENSP00000449205,ENSP00000448223,ENSP00000448639,ENSP00000449854,ENSP00000450222,ENSP00000449328,ENSP00000366471,ENSP00000448046,ENSP00000447311,ENSP00000376299,ENSP00000450121	2	2	10	9.6954e-07	0.000460765	0.0172042	8.94058e+07
ENSP00000450459	ENSG00000259431	THTPA	thiamine triphosphatase [Source:HGNC Symbol;Acc:HGNC:18987]	yes	0.13333333333333333	5	ENSP00000288014,ENSP00000452281,ENSP00000450459,ENSP00000384580,ENSP00000451835	1	1	1	5.10672e-05	0.000157101	0.00699383	NA
ENSP00000450497	ENSG00000166170	BAG5	BCL2-associated athanogene 5 [Source:HGNC Symbol;Acc:HGNC:941]	yes	0.07109004739336493	4	ENSP00000391713,ENSP00000338814,ENSP00000450497,ENSP00000299204	1	1	1	1.55458e-05	0.000157101	0.00699383	155354976
ENSP00000450628	ENSG00000042088	TDP1	tyrosyl-DNA phosphodiesterase 1 [Source:HGNC Symbol;Acc:HGNC:18884]	yes	0.05709342560553633	8	ENSP00000377098,ENSP00000450795,ENSP00000450628,ENSP00000450872,ENSP00000337353,ENSP00000450708,ENSP00000444587,ENSP00000377099	2	2	2	0.0103042	0.00101792	0.0312306	NA
ENSP00000450642	ENSG00000066427	ATXN3	ataxin 3 [Source:HGNC Symbol;Acc:HGNC:7106]	yes	0.23178807947019867	20	ENSP00000450642,ENSP00000478320,ENSP00000376965,ENSP00000451417,ENSP00000481998,ENSP00000451001,ENSP00000425322,ENSP00000445618,ENSP00000484016,ENSP00000450641,ENSP00000452139,ENSP00000426697,ENSP00000451385,ENSP00000474067,ENSP00000481390,ENSP00000339110,ENSP00000451996,ENSP00000437157,ENSP00000389376,ENSP00000435571	2	2	4	0.00864204	0.00126687	0.0366317	82607
ENSP00000450834	ENSG00000100554	ATP6V1D	ATPase, H+ transporting, lysosomal 34kDa, V1 subunit D [Source:HGNC Symbol;Acc:HGNC:13527]	yes	0.22727272727272727	8	ENSP00000450834,ENSP00000450841,ENSP00000452029,ENSP00000451167,ENSP00000452192,ENSP00000452492,ENSP00000216442,ENSP00000451422	1	1	1	0.053023	0.0031314	0.0766336	NA
ENSP00000450928	ENSG00000134970	TMED7	transmembrane emp24 protein transport domain containing 7 [Source:HGNC Symbol;Acc:HGNC:24253]	yes	0.14634146341463414	4	ENSP00000282382,ENSP00000405926,ENSP00000333650,ENSP00000450928	1	1	1	0.0085384	0.00101792	0.0312306	794600
ENSP00000450935	ENSG00000139899	CBLN3	cerebellin 3 precursor [Source:HGNC Symbol;Acc:HGNC:20146]	yes	0.1038961038961039	2	ENSP00000267406,ENSP00000450935	1	1	3	0.0103414	0.00101792	0.0312306	748512
ENSP00000452252	ENSG00000258941		Uncharacterized protein [Source:UniProtKB/TrEMBL;Acc:G3V599]	yes	0.03286034353995519	18	ENSP00000452252,ENSP00000474388,ENSP00000417289,ENSP00000451164,ENSP00000379468,ENSP00000343912,ENSP00000419539,ENSP00000379462,ENSP00000450449,ENSP00000343897,ENSP00000474204,ENSP00000375220,ENSP00000280082,ENSP00000395587,ENSP00000452562,ENSP00000450869,ENSP00000339286,ENSP00000280083	4	4	62	7.51088e-05	0.00101792	0.0312306	7.76035e+07
ENSP00000453207	ENSG00000100949	RABGGTA	Rab geranylgeranyltransferase, alpha subunit [Source:HGNC Symbol;Acc:HGNC:9795]	yes	0.16981132075471697	7	ENSP00000382341,ENSP00000453596,ENSP00000453201,ENSP00000216840,ENSP00000453207,ENSP00000453001,ENSP00000453890	7	7	9	0.000468696	0.00261622	0.0661527	9.15678e+06
ENSP00000453768	ENSG00000170776	AKAP13	A kinase (PRKA) anchor protein 13 [Source:HGNC Symbol;Acc:HGNC:371]	yes	0.04871060171919771	3	ENSP00000378026,ENSP00000354718,ENSP00000453768	5	5	7	1.57611e-12	0.000157101	0.00699383	16340161
ENSP00000453832	ENSG00000100897	DCAF11	DDB1 and CUL4 associated factor 11 [Source:HGNC Symbol;Acc:HGNC:20258]	yes	0.2222222222222222	12	ENSP00000453916,ENSP00000380146,ENSP00000453208,ENSP00000453678,ENSP00000415556,ENSP00000454129,ENSP00000453074,ENSP00000453505,ENSP00000453832,ENSP00000453470,ENSP00000452915,ENSP00000452898	2	2	4	0.00575368	0.00101792	0.0312306	941718
ENSP00000453990	ENSG00000184277	TM2D3	TM2 domain containing 3 [Source:HGNC Symbol;Acc:HGNC:24128]	yes	0.2360248447204969	6	ENSP00000402179,ENSP00000453990,ENSP00000327584,ENSP00000452823,ENSP00000454131,ENSP00000330433	3	3	9	5.33123e-20	0.000157101	0.00699383	8.38236e+06
ENSP00000454358	ENSG00000161999	JMJD8	jumonji domain containing 8 [Source:HGNC Symbol;Acc:HGNC:14148]	yes	0.042735042735042736	3	ENSP00000399475,ENSP00000454358,ENSP00000477481	1	1	1	0.0527059	0.0031314	0.0766336	NA
ENSP00000454408	ENSG00000162065	TBC1D24	TBC1 domain family, member 24 [Source:HGNC Symbol;Acc:HGNC:29203]	yes	0.08318264014466546	6	ENSP00000454408,ENSP00000486835,ENSP00000486121,ENSP00000457896,ENSP00000293970,ENSP00000455547	3	3	10	1.06873e-08	0.000157101	0.00699383	1.20728e+08
ENSP00000454529	ENSG00000206053	HN1L	hematological and neurological expressed 1-like [Source:HGNC Symbol;Acc:HGNC:14137]	yes	0.10434782608695652	8	ENSP00000248098,ENSP00000457344,ENSP00000372157,ENSP00000454567,ENSP00000457694,ENSP00000372158,ENSP00000454529,ENSP00000457424	1	1	1	0.000252452	0.000460765	0.0172042	NA
ENSP00000454784	ENSG00000166589	CDH16	cadherin 16, KSP-cadherin [Source:HGNC Symbol;Acc:HGNC:1755]	yes	0.22025316455696203	9	ENSP00000455523,ENSP00000377619,ENSP00000456690,ENSP00000454784,ENSP00000299752,ENSP00000455263,ENSP00000460891,ENSP00000463451,ENSP00000456891	10	10	29	1.88071e-37	0.000157101	0.00699383	101428544
ENSP00000455720	ENSG00000197006	METTL9	methyltransferase like 9 [Source:HGNC Symbol;Acc:HGNC:24586]	yes	0.1015625	6	ENSP00000379335,ENSP00000454733,ENSP00000455720,ENSP00000454239,ENSP00000350874,ENSP00000480710	1	1	1	0.000212255	0.000460765	0.0172042	1584293
ENSP00000456010	ENSG00000234857	HNRNPUL2-BSCL2	HNRNPUL2-BSCL2 readthrough (NMD candidate) [Source:HGNC Symbol;Acc:HGNC:49189]	yes	0.029490616621983913	2	ENSP00000301785,ENSP00000456010	1	1	1	6.73623e-06	0.000157101	0.00699383	4009249
ENSP00000456048	ENSG00000147274	RBMX	RNA binding motif protein, X-linked [Source:HGNC Symbol;Acc:HGNC:9910]	yes	0.1794871794871795	10	ENSP00000457051,ENSP00000304139,ENSP00000446099,ENSP00000405117,ENSP00000359645,ENSP00000411989,ENSP00000457691,ENSP00000318415,ENSP00000417451,ENSP00000456048	1	1	1	0.00966208	0.00101792	0.0312306	23138
ENSP00000456576	ENSG00000182885	ADGRG3	adhesion G protein-coupled receptor G3 [Source:HGNC Symbol;Acc:HGNC:13728]	yes	0.2608695652173913	3	ENSP00000332900,ENSP00000456576,ENSP00000456409	1	1	1	3.81682e-05	0.000157101	0.00699383	10921577
ENSP00000456711	ENSG00000259753		Integrin beta [Source:UniProtKB/TrEMBL;Acc:H3BM21]	yes	0.10800508259212198	3	ENSP00000452786,ENSP00000461626,ENSP00000456711	6	6	17	1.98184e-16	0.000157101	0.00699383	2.53193e+07
ENSP00000456773	ENSG00000034713	GABARAPL2	GABA(A) receptor-associated protein-like 2 [Source:HGNC Symbol;Acc:HGNC:13291]	yes	0.125	2	ENSP00000037243,ENSP00000456773	1	1	5	0.00118825	0.000460765	0.0172042	440943
ENSP00000456774	ENSG00000140650	PMM2	phosphomannomutase 2 [Source:HGNC Symbol;Acc:HGNC:9115]	yes	0.19327731092436976	12	ENSP00000457956,ENSP00000455066,ENSP00000456302,ENSP00000456774,ENSP00000454284,ENSP00000455320,ENSP00000268261,ENSP00000457932,ENSP00000456961,ENSP00000454395,ENSP00000456275,ENSP00000456024	2	2	5	1.79842e-06	0.000460765	0.0172042	8065535
ENSP00000457279	ENSG00000168928	CTRB2	chymotrypsinogen B2 [Source:HGNC Symbol;Acc:HGNC:2522]	yes	0.4649122807017544	6	ENSP00000303963,ENSP00000455207,ENSP00000463301,ENSP00000457279,ENSP00000354294,ENSP00000454599	2	2	5	1.41296e-12	0.000157101	0.00699383	6.25174e+07
ENSP00000457658	ENSG00000258984	UBE2F-SCLY	UBE2F-SCLY readthrough (NMD candidate) [Source:HGNC Symbol;Acc:HGNC:48339]	yes	0.1917808219178082	12	ENSP00000393515,ENSP00000409749,ENSP00000457658,ENSP00000272930,ENSP00000396003,ENSP00000478474,ENSP00000387299,ENSP00000456827,ENSP00000406113,ENSP00000410867,ENSP00000389685,ENSP00000396630	1	1	4	3.36587e-06	0.000157101	0.00699383	4461329
ENSP00000457995	ENSG00000169627	BOLA2B	bolA family member 2B [Source:HGNC Symbol;Acc:HGNC:32479]	yes	0.18181818181818182	6	ENSP00000457792,ENSP00000457350,ENSP00000457995,ENSP00000331127,ENSP00000306752,ENSP00000458075	1	1	8	1.43429e-05	0.000157101	0.00699383	1.22397e+07
ENSP00000458221	ENSG00000073969	NSF	N-ethylmaleimide-sensitive factor [Source:HGNC Symbol;Acc:HGNC:8016]	yes	0.17456021650879566	15	ENSP00000486400,ENSP00000459646,ENSP00000478614,ENSP00000458221,ENSP00000467779,ENSP00000486150,ENSP00000487479,ENSP00000487064,ENSP00000381293,ENSP00000461448,ENSP00000481714,ENSP00000486903,ENSP00000460152,ENSP00000487474,ENSP00000458184	10	10	26	2.42396e-18	0.000157101	0.00699383	8.38354e+07
ENSP00000458731	ENSG00000133392	MYH11	myosin, heavy chain 11, smooth muscle [Source:HGNC Symbol;Acc:HGNC:7569]	yes	0.05572755417956656	23	ENSP00000353590,ENSP00000406273,ENSP00000408220,ENSP00000384631,ENSP00000470298,ENSP00000269243,ENSP00000458731,ENSP00000369315,ENSP00000262269,ENSP00000478816,ENSP00000407821,ENSP00000472543,ENSP00000366169,ENSP00000469573,ENSP00000300036,ENSP00000379616,ENSP00000407879,ENSP00000478092,ENSP00000472819,ENSP00000479371,ENSP00000484924,ENSP00000216181,ENSP00000478109	4	8	25	3.00641e-15	0.000157101	0.00699383	1.86879e+08
ENSP00000458991	ENSG00000103310	ZP2	zona pellucida glycoprotein 2 (sperm receptor) [Source:HGNC Symbol;Acc:HGNC:13188]	yes	0.017663043478260868	2	ENSP00000460971,ENSP00000458991	1	1	1	0.000136732	0.000157101	0.00699383	348109
ENSP00000460852	ENSG00000262484	CCER2	coiled-coil glutamate-rich protein 2 [Source:HGNC Symbol;Acc:HGNC:44662]	yes	0.10655737704918032	2	ENSP00000460852,ENSP00000460665	1	1	2	0.00232159	0.000460765	0.0172042	633658
ENSP00000461694	ENSG00000121064	SCPEP1	serine carboxypeptidase 1 [Source:HGNC Symbol;Acc:HGNC:29507]	yes	0.17894736842105263	4	ENSP00000461663,ENSP00000458587,ENSP00000461694,ENSP00000262288	1	1	3	0.000354925	0.000460765	0.0172042	226827
ENSP00000461702	ENSG00000262246	CORO7	coronin 7 [Source:HGNC Symbol;Acc:HGNC:26161]	yes	0.05952380952380952	9	ENSP00000483187,ENSP00000460885,ENSP00000482646,ENSP00000461187,ENSP00000458607,ENSP00000461702,ENSP00000440460,ENSP00000480927,ENSP00000251166	3	3	4	3.94684e-10	0.000157101	0.00699383	1.03314e+07
ENSP00000461740	ENSG00000162078	ZG16B	zymogen granule protein 16B [Source:HGNC Symbol;Acc:HGNC:30456]	yes	0.1348314606741573	4	ENSP00000458847,ENSP00000460793,ENSP00000461740,ENSP00000371715	2	2	14	3.36162e-09	0.000157101	0.00699383	1.30519e+07
ENSP00000461827	ENSG00000181523	SGSH	N-sulfoglucosamine sulfohydrolase [Source:HGNC Symbol;Acc:HGNC:10818]	yes	0.06701030927835051	2	ENSP00000461827,ENSP00000314606	1	1	1	0.00183406	0.000460765	0.0172042	NA
ENSP00000462017	ENSG00000135720	DYNC1LI2	dynein, cytoplasmic 1, light intermediate chain 2 [Source:HGNC Symbol;Acc:HGNC:2966]	yes	0.0718562874251497	3	ENSP00000258198,ENSP00000394289,ENSP00000462017	1	1	1	0.000449128	0.000460765	0.0172042	16763504
ENSP00000462478	ENSG00000189159	HN1	hematological and neurological expressed 1 [Source:HGNC Symbol;Acc:HGNC:14569]	yes	0.3888888888888889	5	ENSP00000462784,ENSP00000462834,ENSP00000462478,ENSP00000464266,ENSP00000387059	1	1	1	0.000292914	0.000460765	0.0172042	12025337
ENSP00000462696	ENSG00000153976	HS3ST3A1	heparan sulfate (glucosamine) 3-O-sulfotransferase 3A1 [Source:HGNC Symbol;Acc:HGNC:5196]	yes	0.05392156862745098	4	ENSP00000436078,ENSP00000354213,ENSP00000462696,ENSP00000284110	1	1	6	0.00235058	0.000460765	0.0172042	354630194
ENSP00000463018	ENSG00000134265	NAPG	N-ethylmaleimide-sensitive factor attachment protein, gamma [Source:HGNC Symbol;Acc:HGNC:7642]	yes	0.05084745762711865	2	ENSP00000463018,ENSP00000324628	1	1	1	0.0823737	0.00717386	0.152337	NA
ENSP00000463266	ENSG00000150394	CDH8	cadherin 8, type 2 [Source:HGNC Symbol;Acc:HGNC:1767]	yes	0.1092436974789916	6	ENSP00000462976,ENSP00000463511,ENSP00000299345,ENSP00000463266,ENSP00000462018,ENSP00000462701	4	4	13	2.18631e-13	0.000157101	0.00699383	1412191
ENSP00000463612	ENSG00000173762	CD7	CD7 molecule [Source:HGNC Symbol;Acc:HGNC:1695]	yes	0.10407239819004525	2	ENSP00000312027,ENSP00000463612	1	1	5	3.01814e-08	0.000157101	0.00699383	8340965
ENSP00000464145	ENSG00000266524	GDF10	growth differentiation factor 10 [Source:HGNC Symbol;Acc:HGNC:4215]	yes	0.02510460251046025	1	ENSP00000464145	1	1	2	0.00175614	0.000460765	0.0172042	1828654
ENSP00000464195	ENSG00000181396	OGFOD3	2-oxoglutarate and iron-dependent oxygenase domain containing 3 [Source:HGNC Symbol;Acc:HGNC:26174]	yes	0.1037344398340249	5	ENSP00000467074,ENSP00000320116,ENSP00000463566,ENSP00000330075,ENSP00000464195	2	2	2	5.34193e-10	0.000157101	0.00699383	7484393
ENSP00000465537	ENSG00000073670	ADAM11	ADAM metallopeptidase domain 11 [Source:HGNC Symbol;Acc:HGNC:189]	yes	0.07930367504835589	3	ENSP00000200557,ENSP00000443773,ENSP00000465537	2	2	4	1.96257e-12	0.000157101	0.00699383	3.59532e+06
ENSP00000465557	ENSG00000070540	WIPI1	WD repeat domain, phosphoinositide interacting 1 [Source:HGNC Symbol;Acc:HGNC:25471]	yes	0.37037037037037035	5	ENSP00000465557,ENSP00000465695,ENSP00000437345,ENSP00000466270,ENSP00000262139	1	1	2	8.79229e-06	0.000157101	0.00699383	NA
ENSP00000465798	ENSG00000131475	VPS25	vacuolar protein sorting 25 homolog (S. cerevisiae) [Source:HGNC Symbol;Acc:HGNC:28122]	yes	0.09009009009009009	2	ENSP00000253794,ENSP00000465798	1	1	7	0.0205912	0.00126687	0.0366317	1.87186e+06
ENSP00000466140	ENSG00000267335		Uncharacterized protein [Source:UniProtKB/TrEMBL;Acc:S4R385]	yes	0.07692307692307693	11	ENSP00000469076,ENSP00000466140,ENSP00000403649,ENSP00000471177,ENSP00000352295,ENSP00000301408,ENSP00000366493,ENSP00000470813,ENSP00000301407,ENSP00000349954,ENSP00000472896	1	1	21	0.0256554	0.00181664	0.0491923	6.46734e+07
ENSP00000466663	ENSG00000132475	H3F3B	H3 histone, family 3B (H3.3B) [Source:HGNC Symbol;Acc:HGNC:4765]	yes	0.29347826086956524	28	ENSP00000465403,ENSP00000254810,ENSP00000467165,ENSP00000483283,ENSP00000482271,ENSP00000352252,ENSP00000355781,ENSP00000484658,ENSP00000358160,ENSP00000466663,ENSP00000355657,ENSP00000484841,ENSP00000468714,ENSP00000355779,ENSP00000484095,ENSP00000358154,ENSP00000366999,ENSP00000466020,ENSP00000480826,ENSP00000468484,ENSP00000333277,ENSP00000385479,ENSP00000339835,ENSP00000465813,ENSP00000484638…	3	3	7	0.000950013	0.00101792	0.0312306	4.3201e+08
ENSP00000468139	ENSG00000224916	APOC4-APOC2	APOC4-APOC2 readthrough (NMD candidate) [Source:HGNC Symbol;Acc:HGNC:44426]	yes	0.37640449438202245	8	ENSP00000252490,ENSP00000476835,ENSP00000465001,ENSP00000467185,ENSP00000468236,ENSP00000466444,ENSP00000468139,ENSP00000466775	8	9	868	4.28169e-31	0.000157101	0.00699383	1.06639e+10
ENSP00000468214	ENSG00000108309	RUNDC3A	RUN domain containing 3A [Source:HGNC Symbol;Acc:HGNC:16984]	yes	0.0175	4	ENSP00000225441,ENSP00000410862,ENSP00000468214,ENSP00000483684	1	1	2	0.0942707	0.00912014	0.185002	630188
ENSP00000468543	ENSG00000160633	SAFB	scaffold attachment factor B [Source:HGNC Symbol;Acc:HGNC:10520]	yes	0.19811320754716982	5	ENSP00000415895,ENSP00000468543,ENSP00000292123,ENSP00000467423,ENSP00000464840	1	1	1	0.0146938	0.00101792	0.0312306	3491384
ENSP00000468545	ENSG00000126246	IGFLR1	IGF-like family receptor 1 [Source:HGNC Symbol;Acc:HGNC:23620]	yes	0.2196969696969697	4	ENSP00000466181,ENSP00000468545,ENSP00000246532,ENSP00000468644	2	2	2	8.36606e-06	0.000460765	0.0172042	1583827
ENSP00000468822	ENSG00000197808	ZNF461	zinc finger protein 461 [Source:HGNC Symbol;Acc:HGNC:21629]	yes	0.2676056338028169	4	ENSP00000468822,ENSP00000353515,ENSP00000479585,ENSP00000467931	2	2	20	0.0369291	0.00614045	0.134115	6.8907e+07
ENSP00000468984	ENSG00000269699	ZIM2	zinc finger, imprinted 2 [Source:HGNC Symbol;Acc:HGNC:12875]	yes	0.11005692599620494	4	ENSP00000486502,ENSP00000472306,ENSP00000470326,ENSP00000468984	2	2	3	0.00766209	0.00261622	0.0661527	150234956
ENSP00000469074	ENSG00000090674	MCOLN1	mucolipin 1 [Source:HGNC Symbol;Acc:HGNC:13356]	yes	0.04	2	ENSP00000264079,ENSP00000469074	1	1	1	0.0306074	0.00261622	0.0661527	NA
ENSP00000470540	ENSG00000142552	RCN3	reticulocalbin 3, EF-hand calcium binding domain [Source:HGNC Symbol;Acc:HGNC:21145]	yes	0.17751479289940827	3	ENSP00000469727,ENSP00000470540,ENSP00000270645	2	2	8	0.000230719	0.000460765	0.0172042	8.03264e+06
ENSP00000470615	ENSG00000281039		Gamma-glutamylcyclotransferase [Source:UniProtKB/TrEMBL;Acc:M0QZK8]	yes	0.42718446601941745	5	ENSP00000470615,ENSP00000275428,ENSP00000390094,ENSP00000386610,ENSP00000386686	4	4	42	4.09767e-11	0.000157101	0.00699383	816809440
ENSP00000470792	ENSG00000141985	SH3GL1	SH3-domain GRB2-like 1 [Source:HGNC Symbol;Acc:HGNC:10830]	yes	0.039473684210526314	3	ENSP00000470792,ENSP00000404568,ENSP00000269886	1	1	3	0.000235824	0.000460765	0.0172042	NA
ENSP00000470989	ENSG00000183760		Iron/zinc purple acid phosphatase-like protein [Source:UniProtKB/Swiss-Prot;Acc:Q6ZNF0]	yes	0.038922155688622756	3	ENSP00000469048,ENSP00000470989,ENSP00000327557	1	1	1	0.000346238	0.000460765	0.0172042	NA
ENSP00000471124	ENSG00000243137	PSG4	pregnancy specific beta-1-glycoprotein 4 [Source:HGNC Symbol;Acc:HGNC:9521]	yes	0.3184931506849315	36	ENSP00000469547,ENSP00000471124,ENSP00000480429,ENSP00000344413,ENSP00000386008,ENSP00000471866,ENSP00000478484,ENSP00000244296,ENSP00000481887,ENSP00000421986,ENSP00000472423,ENSP00000270077,ENSP00000384770,ENSP00000468936,ENSP00000471453,ENSP00000382334,ENSP00000472885,ENSP00000472372,ENSP00000480223,ENSP00000187910,ENSP00000470856,ENSP00000292125,ENSP00000387864,ENSP00000485117,ENSP00000385250…	1	6	37	2.19922e-05	0.000157101	0.00699383	21534710
ENSP00000471866	ENSG00000204941	PSG5	pregnancy specific beta-1-glycoprotein 5 [Source:HGNC Symbol;Acc:HGNC:9522]	yes	0.2523364485981308	28	ENSP00000469547,ENSP00000471124,ENSP00000344413,ENSP00000386008,ENSP00000471866,ENSP00000481887,ENSP00000472423,ENSP00000270077,ENSP00000384770,ENSP00000468936,ENSP00000400484,ENSP00000472885,ENSP00000382334,ENSP00000470412,ENSP00000471453,ENSP00000480223,ENSP00000244293,ENSP00000472818,ENSP00000292125,ENSP00000387864,ENSP00000385250,ENSP00000187910,ENSP00000332215,ENSP00000388134,ENSP00000385736…	2	6	81	5.5524e-07	0.000157101	0.00699383	14810314
ENSP00000472124	ENSG00000270629	NBPF14	neuroblastoma breakpoint family, member 14 [Source:HGNC Symbol;Acc:HGNC:25232]	yes	0.21686746987951808	11	ENSP00000477065,ENSP00000462298,ENSP00000473427,ENSP00000472124,ENSP00000483006,ENSP00000256646,ENSP00000354929,ENSP00000479088,ENSP00000476330,ENSP00000464060,ENSP00000485259	1	3	38	5.74825e-08	0.000157101	0.00699383	3.39822e+07
ENSP00000472399	ENSG00000060566	CREB3L3	cAMP responsive element binding protein 3-like 3 [Source:HGNC Symbol;Acc:HGNC:18855]	yes	0.0718954248366013	3	ENSP00000078445,ENSP00000469355,ENSP00000472399	2	2	13	2.28259e-11	0.000157101	0.00699383	306768430
ENSP00000472469	ENSG00000233927	RPS28	ribosomal protein S28 [Source:HGNC Symbol;Acc:HGNC:10418]	yes	0.17391304347826086	1	ENSP00000472469	1	1	6	0.00700419	0.00101792	0.0312306	4486082
ENSP00000473130	ENSG00000142002	DPP9	dipeptidyl-peptidase 9 [Source:HGNC Symbol;Acc:HGNC:18648]	yes	0.08943089430894309	6	ENSP00000472224,ENSP00000469603,ENSP00000472549,ENSP00000472430,ENSP00000262960,ENSP00000473130	1	1	1	0.00257984	0.000460765	0.0172042	NA
ENSP00000473367	ENSG00000270106	TSNAX-DISC1	TSNAX-DISC1 readthrough (NMD candidate) [Source:HGNC Symbol;Acc:HGNC:49177]	yes	0.1935483870967742	6	ENSP00000355599,ENSP00000473307,ENSP00000473367,ENSP00000397537,ENSP00000473532,ENSP00000473456	3	3	5	4.59574e-05	0.00126687	0.0366317	7.88419e+06
ENSP00000474013	ENSG00000270467	IGHV3OR16-12	immunoglobulin heavy variable 3/OR16-12 (non-functional) [Source:HGNC Symbol;Acc:HGNC:5636]	yes	0.09401709401709402	1	ENSP00000474013	1	1	51	5.63877e-05	0.000157101	0.00699383	1.67687e+08
ENSP00000474284	ENSG00000270505	IGHV1OR15-1	immunoglobulin heavy variable 1/OR15-1 (non-functional) [Source:HGNC Symbol;Acc:HGNC:5563]	yes	0.09401709401709402	2	ENSP00000474284,ENSP00000486959	1	1	1	0.00345359	0.000460765	0.0172042	NA
ENSP00000474363	ENSG00000270472	IGHV3OR16-9	immunoglobulin heavy variable 3/OR16-9 (non-functional) [Source:HGNC Symbol;Acc:HGNC:5644]	yes	0.30612244897959184	5	ENSP00000475107,ENSP00000478725,ENSP00000480183,ENSP00000474363,ENSP00000480035	1	2	67	0.00038708	0.000460765	0.0172042	2.04529e+06
ENSP00000474509	ENSG00000259490	IGHV3OR15-7	immunoglobulin heavy variable 3/OR15-7 (pseudogene) [Source:HGNC Symbol;Acc:HGNC:5633]	yes	0.20168067226890757	4	ENSP00000474509,ENSP00000416201,ENSP00000480183,ENSP00000480035	1	2	21	0.0745009	0.00535184	0.119514	9.62521e+06
ENSP00000474522	ENSG00000270647	TAF15	TAF15 RNA polymerase II, TATA box binding protein (TBP)-associated factor, 68kDa [Source:HGNC Symbol;Acc:HGNC:11547]	yes	0.031180400890868598	7	ENSP00000480040,ENSP00000474096,ENSP00000455282,ENSP00000474522,ENSP00000474609,ENSP00000369594,ENSP00000254108	1	1	1	0.00197578	0.000460765	0.0172042	NA
ENSP00000477314	ENSG00000272674	PCDHB16	protocadherin beta 16 [Source:HGNC Symbol;Acc:HGNC:14546]	yes	0.10438144329896908	23	ENSP00000239444,ENSP00000485303,ENSP00000438466,ENSP00000345491,ENSP00000231136,ENSP00000194155,ENSP00000485464,ENSP00000477314,ENSP00000485034,ENSP00000231134,ENSP00000231137,ENSP00000231173,ENSP00000478606,ENSP00000239450,ENSP00000485449,ENSP00000485553,ENSP00000231130,ENSP00000194152,ENSP00000485055,ENSP00000239449,ENSP00000444518,ENSP00000346802,ENSP00000239446	4	6	15	1.05848e-08	0.000460765	0.0172042	2445169
ENSP00000477615	ENSG00000277377	SERPINA1	serpin peptidase inhibitor, clade A (alpha-1 antiproteinase, antitrypsin), member 1 [Source:HGNC Symbol;Acc:HGNC:8941]	yes	0.30861244019138756	22	ENSP00000408474,ENSP00000486957,ENSP00000390299,ENSP00000486935,ENSP00000376803,ENSP00000416066,ENSP00000479923,ENSP00000477615,ENSP00000416354,ENSP00000452169,ENSP00000480231,ENSP00000385960,ENSP00000487579,ENSP00000348068,ENSP00000450561,ENSP00000376802,ENSP00000485908,ENSP00000486302,ENSP00000486067,ENSP00000451525,ENSP00000386094,ENSP00000487269	2	12	108	1.7766e-09	0.000157101	0.00699383	4.8295e+06
ENSP00000477708	ENSG00000275841		Leukocyte immunoglobulin-like receptor subfamily A member 3 [Source:UniProtKB/Swiss-Prot;Acc:Q8N6C8]	yes	0.058666666666666666	9	ENSP00000482971,ENSP00000480386,ENSP00000484564,ENSP00000480252,ENSP00000478188,ENSP00000484119,ENSP00000481818,ENSP00000477708,ENSP00000483374	2	2	108	2.57162e-07	0.000157101	0.00699383	3596921472
ENSP00000478571	ENSG00000278801			yes	0.033854166666666664	3	ENSP00000478893,ENSP00000478571,ENSP00000374998	1	1	6	3.79325e-05	0.000157101	0.00699383	41579056
ENSP00000478629	ENSG00000243232	PCDHAC2	protocadherin alpha subfamily C, 2 [Source:HGNC Symbol;Acc:HGNC:8677]	yes	0.05995475113122172	2	ENSP00000289269,ENSP00000478629	4	4	16	6.88072e-13	0.000157101	0.00699383	7.56027e+06
ENSP00000478770	ENSG00000276053	LAIR1	leukocyte-associated immunoglobulin-like receptor 1 [Source:HGNC Symbol;Acc:HGNC:6477]	yes	0.19117647058823528	28	ENSP00000479294,ENSP00000479707,ENSP00000479682,ENSP00000319204,ENSP00000481597,ENSP00000478029,ENSP00000478405,ENSP00000482922,ENSP00000391003,ENSP00000479133,ENSP00000418998,ENSP00000412796,ENSP00000375623,ENSP00000480659,ENSP00000482135,ENSP00000484578,ENSP00000479006,ENSP00000301193,ENSP00000481204,ENSP00000478770,ENSP00000479649,ENSP00000482633,ENSP00000479951,ENSP00000484953,ENSP00000375622…	2	2	14	1.72202e-09	0.000157101	0.00699383	2.02772e+07
ENSP00000478826	ENSG00000120913	PDLIM2	PDZ and LIM domain 2 (mystique) [Source:HGNC Symbol;Acc:HGNC:13992]	yes	0.1527777777777778	15	ENSP00000428700,ENSP00000477546,ENSP00000342035,ENSP00000478826,ENSP00000380868,ENSP00000399696,ENSP00000479453,ENSP00000481268,ENSP00000387084,ENSP00000394376,ENSP00000380867,ENSP00000265810,ENSP00000429988,ENSP00000386868,ENSP00000312634	1	1	1	0.0116997	0.00101792	0.0312306	20929728
ENSP00000478923	ENSG00000114646	CSPG5	chondroitin sulfate proteoglycan 5 (neuroglycan C) [Source:HGNC Symbol;Acc:HGNC:2467]	yes	0.027253668763102725	3	ENSP00000373244,ENSP00000478923,ENSP00000264723	1	1	4	8.97315e-05	0.000157101	0.00699383	4.26646e+06
ENSP00000479021	ENSG00000089006	SNX5	sorting nexin 5 [Source:HGNC Symbol;Acc:HGNC:14969]	yes	0.12352941176470589	5	ENSP00000366998,ENSP00000366988,ENSP00000404448,ENSP00000479021,ENSP00000406731	2	2	7	2.88279e-06	0.000460765	0.0172042	8.37336e+09
ENSP00000479032	ENSG00000242076	IGKV1-33	immunoglobulin kappa variable 1-33 [Source:HGNC Symbol;Acc:HGNC:5737]	yes	0.3148148148148148	4	ENSP00000482678,ENSP00000479032,ENSP00000420020,ENSP00000374800	2	2	23	6.30119e-11	0.000157101	0.00699383	57680744
ENSP00000479132	ENSG00000254122	PCDHGB7	protocadherin gamma subfamily B, 7 [Source:HGNC Symbol;Acc:HGNC:8714]	yes	0.038366336633663366	4	ENSP00000479132,ENSP00000428603,ENSP00000381594,ENSP00000479143	1	2	2	1.74875e-05	0.000157101	0.00699383	NA
ENSP00000479143	ENSG00000253305	PCDHGB6	protocadherin gamma subfamily B, 6 [Source:HGNC Symbol;Acc:HGNC:8713]	yes	0.04024390243902439	4	ENSP00000479143,ENSP00000428603,ENSP00000381594,ENSP00000479132	2	3	3	7.67644e-06	0.000460765	0.0172042	NA
ENSP00000479647	ENSG00000182208	MOB2	MOB kinase activator 2 [Source:HGNC Symbol;Acc:HGNC:24904]	yes	0.046610169491525424	2	ENSP00000328694,ENSP00000479647	1	1	1	0.00299415	0.000460765	0.0172042	1448905
ENSP00000480035	ENSG00000225698	IGHV3-72	immunoglobulin heavy variable 3-72 [Source:HGNC Symbol;Acc:HGNC:5622]	yes	0.42574257425742573	7	ENSP00000478725,ENSP00000416201,ENSP00000480183,ENSP00000474363,ENSP00000475107,ENSP00000474509,ENSP00000480035	1	3	95	0.000186367	0.000460765	0.0172042	2.51606e+07
ENSP00000480150	ENSG00000149428	HYOU1	hypoxia up-regulated 1 [Source:HGNC Symbol;Acc:HGNC:16931]	yes	0.3933933933933934	16	ENSP00000431874,ENSP00000484186,ENSP00000483106,ENSP00000485827,ENSP00000487018,ENSP00000486231,ENSP00000480248,ENSP00000463318,ENSP00000486825,ENSP00000486966,ENSP00000486718,ENSP00000480150,ENSP00000462951,ENSP00000487387,ENSP00000467866,ENSP00000486257	34	34	468	3.664e-165	0.000157101	0.00699383	3.92133e+09
ENSP00000480512	ENSG00000138650	PCDH10	protocadherin 10 [Source:HGNC Symbol;Acc:HGNC:13404]	yes	0.04575892857142857	2	ENSP00000480512,ENSP00000264360	3	3	10	1.63347e-13	0.000157101	0.00699383	2.52723e+06
ENSP00000480746	ENSG00000258644	SYNJ2BP-COX16	SYNJ2BP-COX16 readthrough [Source:HGNC Symbol;Acc:HGNC:48350]	yes	0.16666666666666666	5	ENSP00000482133,ENSP00000484161,ENSP00000478757,ENSP00000480746,ENSP00000374562	1	1	4	0.0341402	0.00261622	0.0661527	325027
ENSP00000480959	ENSG00000276566	IGKV1D-13	immunoglobulin kappa variable 1D-13 [Source:HGNC Symbol;Acc:HGNC:5747]	yes	0.13675213675213677	1	ENSP00000480959	1	1	27	6.16512e-07	0.000157101	0.00699383	8.43576e+07
ENSP00000481152	ENSG00000277856			yes	0.30612244897959184	1	ENSP00000481152	2	2	25	9.28446e-09	0.000157101	0.00699383	120204924
ENSP00000481157	ENSG00000253846	PCDHGA10	protocadherin gamma subfamily A, 10 [Source:HGNC Symbol;Acc:HGNC:8697]	yes	0.024705882352941175	2	ENSP00000381611,ENSP00000481157	2	2	7	0.000257873	0.00101792	0.0312306	5.29075e+06
ENSP00000481438	ENSG00000253159	PCDHGA12	protocadherin gamma subfamily A, 12 [Source:HGNC Symbol;Acc:HGNC:8699]	yes	0.0975609756097561	7	ENSP00000477805,ENSP00000480917,ENSP00000481438,ENSP00000381589,ENSP00000428333,ENSP00000430024,ENSP00000252085	6	7	16	2.99859e-17	0.000157101	0.00699383	1.02309e+08
ENSP00000481473	ENSG00000123240	OPTN	optineurin [Source:HGNC Symbol;Acc:HGNC:17142]	yes	0.2616822429906542	7	ENSP00000368021,ENSP00000368027,ENSP00000481473,ENSP00000368022,ENSP00000368040,ENSP00000368032,ENSP00000263036	2	2	5	1.24553e-05	0.000460765	0.0172042	4651741
ENSP00000481500	ENSG00000205765	C5orf51	chromosome 5 open reading frame 51 [Source:HGNC Symbol;Acc:HGNC:27750]	yes	0.09210526315789473	2	ENSP00000371061,ENSP00000481500	1	1	1	0.00468102	0.000460765	0.0172042	NA
ENSP00000481691	ENSG00000211896	IGHG1	immunoglobulin heavy constant gamma 1 (G1m marker) [Source:HGNC Symbol;Acc:HGNC:5525]	yes	0.39789473684210525	25	ENSP00000483967,ENSP00000374984,ENSP00000483022,ENSP00000374991,ENSP00000375003,ENSP00000374987,ENSP00000483165,ENSP00000483341,ENSP00000375014,ENSP00000481569,ENSP00000481691,ENSP00000479178,ENSP00000478578,ENSP00000481130,ENSP00000479626,ENSP00000484069,ENSP00000374990,ENSP00000481725,ENSP00000374993,ENSP00000480351,ENSP00000479728,ENSP00000483889,ENSP00000478845,ENSP00000483393,ENSP00000374985	1	17	696	0.00180025	0.000460765	0.0172042	214265664
ENSP00000481724	ENSG00000136758	YME1L1	YME1-like 1 ATPase [Source:HGNC Symbol;Acc:HGNC:12843]	yes	0.0424597364568082	5	ENSP00000365139,ENSP00000365184,ENSP00000473557,ENSP00000481724,ENSP00000318480	2	2	2	0.00108429	0.000460765	0.0172042	NA
ENSP00000481875	ENSG00000125675	GRIA3	glutamate receptor, ionotropic, AMPA 3 [Source:HGNC Symbol;Acc:HGNC:4573]	yes	0.019417475728155338	4	ENSP00000446440,ENSP00000478489,ENSP00000481875,ENSP00000481554	1	1	11	0.0753888	0.00614045	0.134115	34180091
ENSP00000481887	ENSG00000183668	PSG9	pregnancy specific beta-1-glycoprotein 9 [Source:HGNC Symbol;Acc:HGNC:9526]	yes	0.22673031026252982	37	ENSP00000471124,ENSP00000480429,ENSP00000344413,ENSP00000386008,ENSP00000471866,ENSP00000478484,ENSP00000244296,ENSP00000472423,ENSP00000471174,ENSP00000396753,ENSP00000481887,ENSP00000270077,ENSP00000384770,ENSP00000468936,ENSP00000400484,ENSP00000480223,ENSP00000382334,ENSP00000471453,ENSP00000291752,ENSP00000421986,ENSP00000470856,ENSP00000292125,ENSP00000413041,ENSP00000485117,ENSP00000385250…	5	9	116	1.53575e-18	0.000157101	0.00699383	9.04505e+08
ENSP00000482077	ENSG00000168118	RAB4A	RAB4A, member RAS oncogene family [Source:HGNC Symbol;Acc:HGNC:9781]	yes	0.07964601769911504	7	ENSP00000470246,ENSP00000471803,ENSP00000349560,ENSP00000471504,ENSP00000469872,ENSP00000482077,ENSP00000355651	1	1	2	0.0776525	0.00614045	0.134115	2903472
ENSP00000482216	ENSG00000186866	POFUT2	protein O-fucosyltransferase 2 [Source:HGNC Symbol;Acc:HGNC:14683]	yes	0.07801418439716312	5	ENSP00000329682,ENSP00000482216,ENSP00000335427,ENSP00000339613,ENSP00000407635	1	1	2	0.0360532	0.00261622	0.0661527	78947
ENSP00000482365	ENSG00000274311	LILRB5	leukocyte immunoglobulin-like receptor, subfamily B (with TM and ITIM domains), member 5 [Source:HGNC Symbol;Acc:HGNC:6609]	yes	0.05918367346938776	20	ENSP00000481263,ENSP00000479413,ENSP00000483649,ENSP00000478835,ENSP00000479022,ENSP00000480909,ENSP00000483942,ENSP00000482404,ENSP00000263430,ENSP00000320390,ENSP00000483481,ENSP00000482062,ENSP00000481829,ENSP00000406478,ENSP00000482535,ENSP00000483502,ENSP00000482365,ENSP00000478307,ENSP00000478912,ENSP00000480208	2	2	49	2.5035e-11	0.000157101	0.00699383	244853264
ENSP00000482442	ENSG00000137726	FXYD6	FXYD domain containing ion transport regulator 6 [Source:HGNC Symbol;Acc:HGNC:4030]	yes	0.1875	18	ENSP00000436629,ENSP00000431427,ENSP00000260287,ENSP00000444243,ENSP00000431913,ENSP00000464144,ENSP00000464057,ENSP00000482442,ENSP00000432430,ENSP00000463024,ENSP00000463160,ENSP00000436414,ENSP00000260282,ENSP00000292079,ENSP00000442756,ENSP00000431446,ENSP00000433312,ENSP00000463158	2	2	7	1.36914e-09	0.000157101	0.00699383	3.71262e+06
ENSP00000482718	ENSG00000154511	FAM69A	family with sequence similarity 69, member A [Source:HGNC Symbol;Acc:HGNC:32213]	yes	0.04065040650406504	4	ENSP00000484866,ENSP00000482478,ENSP00000359333,ENSP00000482718	1	1	2	4.42052e-06	0.000157101	0.00699383	875430
ENSP00000483665	ENSG00000137261	KIAA0319	KIAA0319 [Source:HGNC Symbol;Acc:HGNC:21580]	yes	0.028985507246376812	6	ENSP00000483665,ENSP00000437656,ENSP00000367459,ENSP00000439700,ENSP00000442403,ENSP00000401086	1	1	1	0.000737293	0.000460765	0.0172042	5015728
ENSP00000483708	ENSG00000276042	LILRB4	leukocyte immunoglobulin-like receptor, subfamily B (with TM and ITIM domains), member 4 [Source:HGNC Symbol;Acc:HGNC:6608]	yes	0.07738095238095238	26	ENSP00000478542,ENSP00000484286,ENSP00000484515,ENSP00000479289,ENSP00000478511,ENSP00000401962,ENSP00000482694,ENSP00000375614,ENSP00000484809,ENSP00000408995,ENSP00000483296,ENSP00000483708,ENSP00000478727,ENSP00000484720,ENSP00000478476,ENSP00000478584,ENSP00000478077,ENSP00000481233,ENSP00000375616,ENSP00000375613,ENSP00000483171,ENSP00000479497,ENSP00000479829,ENSP00000483376,ENSP00000481609…	1	1	3	2.1454e-05	0.000157101	0.00699383	NA
ENSP00000484138	ENSG00000277761			yes	0.14666666666666667	3	ENSP00000484138,ENSP00000401707,ENSP00000474941	2	2	8	3.0932e-07	0.000460765	0.0172042	50951432
ENSP00000484273	ENSG00000053108	FSTL4	follistatin-like 4 [Source:HGNC Symbol;Acc:HGNC:21389]	yes	0.017830609212481426	5	ENSP00000265342,ENSP00000389270,ENSP00000484273,ENSP00000305334,ENSP00000368462	1	1	2	0.00322566	0.000460765	0.0172042	373592
ENSP00000484560	ENSG00000253953	PCDHGB4	protocadherin gamma subfamily B, 4 [Source:HGNC Symbol;Acc:HGNC:8711]	yes	0.009962640099626401	2	ENSP00000484560,ENSP00000428288	1	1	2	0.0496346	0.0031314	0.0766336	22706788
ENSP00000484928	ENSG00000179242	CDH4	cadherin 4, type 1, R-cadherin (retinal) [Source:HGNC Symbol;Acc:HGNC:1763]	yes	0.060043668122270744	6	ENSP00000443301,ENSP00000487355,ENSP00000486680,ENSP00000484928,ENSP00000480844,ENSP00000486568	4	4	9	1.28269e-09	0.000157101	0.00699383	1370445
ENSP00000484968	ENSG00000136100	VPS36	vacuolar protein sorting 36 homolog (S. cerevisiae) [Source:HGNC Symbol;Acc:HGNC:20312]	yes	0.03353658536585366	2	ENSP00000484968,ENSP00000367299	1	1	1	0.00176707	0.000460765	0.0172042	100712624
ENSP00000485055	ENSG00000120327	PCDHB14	protocadherin beta 14 [Source:HGNC Symbol;Acc:HGNC:8685]	yes	0.06976744186046512	22	ENSP00000239444,ENSP00000485303,ENSP00000438466,ENSP00000345491,ENSP00000231136,ENSP00000194155,ENSP00000478606,ENSP00000477314,ENSP00000485034,ENSP00000231134,ENSP00000231137,ENSP00000485464,ENSP00000239450,ENSP00000231173,ENSP00000485553,ENSP00000231130,ENSP00000194152,ENSP00000485055,ENSP00000239449,ENSP00000444518,ENSP00000346802,ENSP00000239446	2	3	4	7.61434e-07	0.000157101	0.00699383	3760309
ENSP00000485478	ENSG00000148600	CDHR1	cadherin-related family member 1 [Source:HGNC Symbol;Acc:HGNC:14550]	yes	0.06752037252619325	3	ENSP00000485478,ENSP00000361189,ENSP00000331063	4	4	23	2.58806e-14	0.000157101	0.00699383	1.6205e+07
ENSP00000485552	ENSG00000255071	SAA2-SAA4	SAA2-SAA4 readthrough [Source:HGNC Symbol;Acc:HGNC:39550]	yes	0.16346153846153846	12	ENSP00000348918,ENSP00000278222,ENSP00000435659,ENSP00000485552,ENSP00000384906,ENSP00000437162,ENSP00000416716,ENSP00000432370,ENSP00000436126,ENSP00000483326,ENSP00000256733,ENSP00000436866	2	4	209	6.90822e-08	0.000157101	0.00699383	1.92488e+09
ENSP00000485806	ENSG00000275430	MUC20	mucin 20, cell surface associated [Source:HGNC Symbol;Acc:HGNC:23282]	yes	0.10236220472440945	32	ENSP00000486549,ENSP00000487039,ENSP00000479182,ENSP00000487262,ENSP00000482294,ENSP00000485873,ENSP00000485921,ENSP00000396774,ENSP00000480845,ENSP00000478544,ENSP00000486236,ENSP00000486753,ENSP00000485806,ENSP00000485837,ENSP00000484531,ENSP00000479454,ENSP00000487047,ENSP00000479947,ENSP00000480568,ENSP00000486769,ENSP00000487573,ENSP00000414350,ENSP00000486409,ENSP00000486805,ENSP00000486526…	1	1	9	0.000182936	0.000460765	0.0172042	5.14947e+07
ENSP00000486476	ENSG00000278466	MUC2	mucin 2, oligomeric mucus/gel-forming [Source:HGNC Symbol;Acc:HGNC:7512]	yes	0.07490237841675541	4	ENSP00000478743,ENSP00000486476,ENSP00000436812,ENSP00000485659	9	10	18	8.60495e-19	0.000157101	0.00699383	5106615
ENSP00000486695	ENSG00000107130	NCS1	neuronal calcium sensor 1 [Source:HGNC Symbol;Acc:HGNC:3953]	yes	0.31976744186046513	2	ENSP00000486695,ENSP00000361475	3	3	6	1.67101e-06	0.000460765	0.0172042	5167197
ENSP00000216181	ENSG00000100345	MYH9	myosin, heavy chain 9, non-muscle [Source:HGNC Symbol;Acc:HGNC:7579]		0.2260204081632653	23	ENSP00000353590,ENSP00000406273,ENSP00000408220,ENSP00000384631,ENSP00000470298,ENSP00000269243,ENSP00000458731,ENSP00000369315,ENSP00000262269,ENSP00000478816,ENSP00000407821,ENSP00000472543,ENSP00000366169,ENSP00000469573,ENSP00000300036,ENSP00000379616,ENSP00000407879,ENSP00000478092,ENSP00000472819,ENSP00000479371,ENSP00000484924,ENSP00000216181,ENSP00000478109	31	35	106	7.64837e-108	0.000157101	0.00699383	1.60263e+08
ENSP00000227378	ENSG00000109971	HSPA8	heat shock 70kDa protein 8 [Source:HGNC Symbol;Acc:HGNC:5241]		0.4024767801857585	39	ENSP00000393087,ENSP00000403530,ENSP00000437125,ENSP00000406359,ENSP00000404372,ENSP00000227378,ENSP00000324173,ENSP00000436183,ENSP00000436762,ENSP00000408347,ENSP00000435019,ENSP00000396486,ENSP00000433584,ENSP00000375399,ENSP00000364802,ENSP00000433316,ENSP00000375391,ENSP00000387691,ENSP00000434851,ENSP00000372881,ENSP00000442789,ENSP00000435908,ENSP00000434415,ENSP00000310219,ENSP00000247207…	13	20	197	1.74462e-38	0.000157101	0.00699383	111648320
ENSP00000252242	ENSG00000186081	KRT5	keratin 5, type II [Source:HGNC Symbol;Acc:HGNC:6442]		0.288135593220339	37	ENSP00000447402,ENSP00000447881,ENSP00000448207,ENSP00000448767,ENSP00000252242,ENSP00000310861,ENSP00000346269,ENSP00000441160,ENSP00000252252,ENSP00000267119,ENSP00000369317,ENSP00000329243,ENSP00000447040,ENSP00000330101,ENSP00000448220,ENSP00000252245,ENSP00000413479,ENSP00000447209,ENSP00000446881,ENSP00000328358,ENSP00000307014,ENSP00000449783,ENSP00000342710,ENSP00000307240,ENSP00000257951…	13	20	163	9.40526e-35	0.000157101	0.00699383	583176656
ENSP00000252244	ENSG00000167768	KRT1	keratin 1, type II [Source:HGNC Symbol;Acc:HGNC:6412]		0.39906832298136646	4	ENSP00000252252,ENSP00000252244,ENSP00000342710,ENSP00000310861	30	33	632	1.15444e-112	0.000157101	0.00699383	3.78969e+09
ENSP00000256646	ENSG00000134250	NOTCH2	notch 2 [Source:HGNC Symbol;Acc:HGNC:7882]		0.12059894779441521	11	ENSP00000477065,ENSP00000462298,ENSP00000473427,ENSP00000472124,ENSP00000483006,ENSP00000256646,ENSP00000354929,ENSP00000479088,ENSP00000476330,ENSP00000464060,ENSP00000485259	14	16	142	9.91828e-67	0.000157101	0.00699383	6.06715e+08
ENSP00000269195	ENSG00000141429	GALNT1	polypeptide N-acetylgalactosaminyltransferase 1 [Source:HGNC Symbol;Acc:HGNC:4123]		0.13059033989266547	4	ENSP00000387239,ENSP00000465341,ENSP00000269195,ENSP00000376570	8	10	67	3.19738e-32	0.000157101	0.00699383	8.16127e+07
ENSP00000269907	ENSG00000105426	PTPRS	protein tyrosine phosphatase, receptor type, S [Source:HGNC Symbol;Acc:HGNC:9681]		0.2031413612565445	20	ENSP00000468455,ENSP00000417093,ENSP00000349932,ENSP00000438164,ENSP00000465185,ENSP00000380741,ENSP00000467398,ENSP00000380731,ENSP00000262963,ENSP00000269907,ENSP00000468803,ENSP00000440515,ENSP00000370593,ENSP00000465443,ENSP00000347373,ENSP00000380735,ENSP00000417661,ENSP00000467537,ENSP00000327313,ENSP00000348812	23	24	310	1.29077e-139	0.000157101	0.00699383	5.15088e+09
ENSP00000290349	ENSG00000159228	CBR1	carbonyl reductase 1 [Source:HGNC Symbol;Acc:HGNC:1548]		0.3104693140794224	5	ENSP00000290354,ENSP00000290349,ENSP00000382143,ENSP00000434613,ENSP00000395132	5	6	52	4.63849e-29	0.000157101	0.00699383	3.26931e+09
ENSP00000293308	ENSG00000170421	KRT8	keratin 8, type II [Source:HGNC Symbol;Acc:HGNC:6446]		0.33954451345755693	45	ENSP00000447402,ENSP00000446881,ENSP00000431702,ENSP00000479984,ENSP00000435613,ENSP00000450340,ENSP00000437182,ENSP00000363071,ENSP00000330101,ENSP00000468500,ENSP00000252245,ENSP00000307014,ENSP00000257951,ENSP00000378292,ENSP00000293308,ENSP00000447566,ENSP00000448207,ENSP00000369361,ENSP00000446007,ENSP00000252242,ENSP00000310861,ENSP00000346269,ENSP00000441160,ENSP00000252252,ENSP00000329243…	11	15	101	6.50943e-27	0.000460765	0.0172042	169092344
ENSP00000305714	ENSG00000168487	BMP1	bone morphogenetic protein 1 [Source:HGNC Symbol;Acc:HGNC:1067]		0.16024340770791076	15	ENSP00000428332,ENSP00000346941,ENSP00000430977,ENSP00000305714,ENSP00000426082,ENSP00000306121,ENSP00000061240,ENSP00000427950,ENSP00000380915,ENSP00000428249,ENSP00000430406,ENSP00000428665,ENSP00000422937,ENSP00000428798,ENSP00000350630	11	14	117	2.32521e-60	0.000157101	0.00699383	6876808256
ENSP00000306261	ENSG00000170423	KRT78	keratin 78, type II [Source:HGNC Symbol;Acc:HGNC:28926]		0.16538461538461538	19	ENSP00000306261,ENSP00000252245,ENSP00000307014,ENSP00000449081,ENSP00000448767,ENSP00000307240,ENSP00000447447,ENSP00000252242,ENSP00000311997,ENSP00000252252,ENSP00000369317,ENSP00000447817,ENSP00000330101,ENSP00000448220,ENSP00000252250,ENSP00000413479,ENSP00000352479,ENSP00000267119,ENSP00000310861	7	9	45	1.70277e-19	0.000157101	0.00699383	1.14157e+08
ENSP00000310861	ENSG00000172867	KRT2	keratin 2, type II [Source:HGNC Symbol;Acc:HGNC:6439]		0.38341158059467917	38	ENSP00000447402,ENSP00000447881,ENSP00000448207,ENSP00000446881,ENSP00000252242,ENSP00000310861,ENSP00000346269,ENSP00000441160,ENSP00000252252,ENSP00000267119,ENSP00000369317,ENSP00000329243,ENSP00000447040,ENSP00000330101,ENSP00000448220,ENSP00000252245,ENSP00000413479,ENSP00000447209,ENSP00000448767,ENSP00000328358,ENSP00000307014,ENSP00000449783,ENSP00000342710,ENSP00000252244,ENSP00000257951…	22	32	562	2.23524e-92	0.000157101	0.00699383	1.92287e+09
ENSP00000315299	ENSG00000178363	CALML3	calmodulin-like 3 [Source:HGNC Symbol;Acc:HGNC:1452]		0.35570469798657717	21	ENSP00000349467,ENSP00000451062,ENSP00000315299,ENSP00000387065,ENSP00000406112,ENSP00000272298,ENSP00000471225,ENSP00000291295,ENSP00000375785,ENSP00000486952,ENSP00000470308,ENSP00000450829,ENSP00000451646,ENSP00000411440,ENSP00000486402,ENSP00000472141,ENSP00000468877,ENSP00000403491,ENSP00000442853,ENSP00000450425,ENSP00000470502	3	5	19	6.28453e-13	0.000157101	0.00699383	6.02122e+06
ENSP00000319960	ENSG00000131042	LILRB2	leukocyte immunoglobulin-like receptor, subfamily B (with TM and ITIM domains), member 2 [Source:HGNC Symbol;Acc:HGNC:6606]		0.15912897822445563	61	ENSP00000478648,ENSP00000483478,ENSP00000484938,ENSP00000379614,ENSP00000395004,ENSP00000480365,ENSP00000483139,ENSP00000481949,ENSP00000480302,ENSP00000481701,ENSP00000315997,ENSP00000375628,ENSP00000379608,ENSP00000480841,ENSP00000481972,ENSP00000481208,ENSP00000319960,ENSP00000391514,ENSP00000375629,ENSP00000483553,ENSP00000481228,ENSP00000479887,ENSP00000480587,ENSP00000481605,ENSP00000480022…	3	6	19	1.0896e-13	0.000157101	0.00699383	7427085
ENSP00000323587	ENSG00000179914	ITLN1	intelectin 1 (galactofuranose binding) [Source:HGNC Symbol;Acc:HGNC:18259]		0.16613418530351437	2	ENSP00000323587,ENSP00000357008	3	4	29	1.64989e-11	0.000157101	0.00699383	4.66168e+08
ENSP00000324173	ENSG00000044574	HSPA5	heat shock 70kDa protein 5 (glucose-regulated protein, 78kDa) [Source:HGNC Symbol;Acc:HGNC:5238]		0.43425076452599387	35	ENSP00000393087,ENSP00000403530,ENSP00000437125,ENSP00000432083,ENSP00000404372,ENSP00000227378,ENSP00000324173,ENSP00000436183,ENSP00000436762,ENSP00000408347,ENSP00000396486,ENSP00000433584,ENSP00000375399,ENSP00000364802,ENSP00000375391,ENSP00000387691,ENSP00000364805,ENSP00000372881,ENSP00000442789,ENSP00000434415,ENSP00000247207,ENSP00000408907,ENSP00000364801,ENSP00000378199,ENSP00000435154…	24	26	536	4.87208e-84	0.000157101	0.00699383	5.77687e+09
ENSP00000328358	ENSG00000185640	KRT79	keratin 79, type II [Source:HGNC Symbol;Acc:HGNC:28930]		0.10654205607476636	33	ENSP00000447402,ENSP00000447881,ENSP00000448207,ENSP00000448767,ENSP00000252242,ENSP00000310861,ENSP00000346269,ENSP00000441160,ENSP00000252252,ENSP00000369317,ENSP00000329243,ENSP00000447040,ENSP00000330101,ENSP00000448220,ENSP00000252245,ENSP00000413479,ENSP00000447209,ENSP00000446881,ENSP00000328358,ENSP00000307014,ENSP00000449783,ENSP00000342710,ENSP00000257951,ENSP00000447447,ENSP00000448681…	2	7	89	0.024694	0.0031314	0.0766336	444591
ENSP00000331514	ENSG00000184009	ACTG1	actin gamma 1 [Source:HGNC Symbol;Acc:HGNC:144]		0.576	38	ENSP00000402373,ENSP00000350052,ENSP00000349960,ENSP00000458435,ENSP00000410706,ENSP00000461407,ENSP00000392894,ENSP00000392718,ENSP00000460660,ENSP00000224784,ENSP00000393951,ENSP00000462823,ENSP00000331514,ENSP00000386786,ENSP00000439189,ENSP00000386929,ENSP00000409264,ENSP00000459119,ENSP00000416706,ENSP00000396730,ENSP00000398239,ENSP00000407473,ENSP00000459124,ENSP00000355645,ENSP00000401032…	14	26	736	8.99423e-70	0.000157101	0.00699383	3.745e+09
ENSP00000333203	ENSG00000188488	SERPINA5	serpin peptidase inhibitor, clade A (alpha-1 antiproteinase, antitrypsin), member 5 [Source:HGNC Symbol;Acc:HGNC:8723]		0.29064039408866993	12	ENSP00000450745,ENSP00000451697,ENSP00000451215,ENSP00000451650,ENSP00000333203,ENSP00000452469,ENSP00000450484,ENSP00000450485,ENSP00000451610,ENSP00000452367,ENSP00000450837,ENSP00000451126	9	9	592	2.92065e-26	0.000157101	0.00699383	4.43984e+09
ENSP00000334983	ENSG00000067225	PKM	pyruvate kinase, muscle [Source:HGNC Symbol;Acc:HGNC:9021]		0.448210922787194	20	ENSP00000339933,ENSP00000456970,ENSP00000455736,ENSP00000457420,ENSP00000373745,ENSP00000320171,ENSP00000457253,ENSP00000455901,ENSP00000461487,ENSP00000454668,ENSP00000334983,ENSP00000459921,ENSP00000456984,ENSP00000456100,ENSP00000457830,ENSP00000403365,ENSP00000456004,ENSP00000455584,ENSP00000376214,ENSP00000457198	2	24	417	1.19187e-17	0.000157101	0.00699383	9.85363e+07
ENSP00000348068	ENSG00000197249	SERPINA1	serpin peptidase inhibitor, clade A (alpha-1 antiproteinase, antitrypsin), member 1 [Source:HGNC Symbol;Acc:HGNC:8941]		0.2966507177033493	22	ENSP00000408474,ENSP00000486957,ENSP00000390299,ENSP00000486935,ENSP00000376803,ENSP00000416066,ENSP00000479923,ENSP00000477615,ENSP00000416354,ENSP00000452169,ENSP00000480231,ENSP00000385960,ENSP00000487579,ENSP00000348068,ENSP00000450561,ENSP00000376802,ENSP00000485908,ENSP00000486302,ENSP00000486067,ENSP00000451525,ENSP00000386094,ENSP00000487269	1	11	98	0.000457554	0.000460765	0.0172042	2791288
ENSP00000348918	ENSG00000173432	SAA1	serum amyloid A1 [Source:HGNC Symbol;Acc:HGNC:10513]		0.3524590163934426	10	ENSP00000348918,ENSP00000416716,ENSP00000432370,ENSP00000485552,ENSP00000436866,ENSP00000256733,ENSP00000436126,ENSP00000437162,ENSP00000384906,ENSP00000435659	1	3	16	2.1694e-09	0.000157101	0.00699383	4.63506e+09
ENSP00000350052	ENSG00000196604	POTEF	POTE ankyrin domain family, member F [Source:HGNC Symbol;Acc:HGNC:33905]		0.08558139534883721	40	ENSP00000402373,ENSP00000350052,ENSP00000349960,ENSP00000458435,ENSP00000410706,ENSP00000461407,ENSP00000392894,ENSP00000392718,ENSP00000290378,ENSP00000460660,ENSP00000224784,ENSP00000393951,ENSP00000462823,ENSP00000331514,ENSP00000386786,ENSP00000355012,ENSP00000439189,ENSP00000386929,ENSP00000409264,ENSP00000459119,ENSP00000416706,ENSP00000396730,ENSP00000398239,ENSP00000407473,ENSP00000459124…	2	6	356	0.0788779	0.00887026	0.180995	348274
ENSP00000355632	ENSG00000143641	GALNT2	polypeptide N-acetylgalactosaminyltransferase 2 [Source:HGNC Symbol;Acc:HGNC:4124]		0.16987740805604204	3	ENSP00000436604,ENSP00000447852,ENSP00000355632	9	11	40	2.73754e-31	0.000157101	0.00699383	1.16818e+08
ENSP00000355645	ENSG00000143632	ACTA1	actin, alpha 1, skeletal muscle [Source:HGNC Symbol;Acc:HGNC:129]		0.41644562334217505	38	ENSP00000402373,ENSP00000350052,ENSP00000349960,ENSP00000458435,ENSP00000410706,ENSP00000461407,ENSP00000392894,ENSP00000392718,ENSP00000460660,ENSP00000224784,ENSP00000393951,ENSP00000462823,ENSP00000331514,ENSP00000386786,ENSP00000439189,ENSP00000386929,ENSP00000409264,ENSP00000459119,ENSP00000416706,ENSP00000396730,ENSP00000398239,ENSP00000407473,ENSP00000459124,ENSP00000355645,ENSP00000401032…	6	16	455	8.34569e-18	0.000157101	0.00699383	2.53146e+07
ENSP00000366169	ENSG00000105357	MYH14	myosin, heavy chain 14, non-muscle [Source:HGNC Symbol;Acc:HGNC:23212]		0.02355889724310777	23	ENSP00000353590,ENSP00000406273,ENSP00000408220,ENSP00000384631,ENSP00000470298,ENSP00000269243,ENSP00000458731,ENSP00000369315,ENSP00000262269,ENSP00000478816,ENSP00000407821,ENSP00000472543,ENSP00000366169,ENSP00000469573,ENSP00000300036,ENSP00000379616,ENSP00000407879,ENSP00000478092,ENSP00000472819,ENSP00000479371,ENSP00000484924,ENSP00000216181,ENSP00000478109	2	4	14	0.000315938	0.00101792	0.0312306	NA
ENSP00000369317	ENSG00000205420	KRT6A	keratin 6A, type II [Source:HGNC Symbol;Acc:HGNC:6443]		0.3067375886524823	38	ENSP00000447402,ENSP00000447881,ENSP00000448207,ENSP00000448767,ENSP00000479984,ENSP00000252242,ENSP00000310861,ENSP00000346269,ENSP00000441160,ENSP00000252252,ENSP00000267119,ENSP00000369317,ENSP00000329243,ENSP00000447040,ENSP00000330101,ENSP00000448220,ENSP00000252245,ENSP00000413479,ENSP00000447209,ENSP00000446881,ENSP00000328358,ENSP00000307014,ENSP00000449783,ENSP00000342710,ENSP00000307240…	1	21	203	0.00662437	0.00101792	0.0312306	5.14095e+06
ENSP00000387176	ENSG00000222038	POTEJ	POTE ankyrin domain family, member J [Source:HGNC Symbol;Acc:HGNC:37094]		0.05491329479768786	37	ENSP00000402373,ENSP00000349960,ENSP00000458435,ENSP00000410706,ENSP00000461407,ENSP00000466346,ENSP00000392718,ENSP00000355645,ENSP00000460660,ENSP00000224784,ENSP00000401032,ENSP00000462823,ENSP00000331514,ENSP00000399487,ENSP00000387182,ENSP00000386929,ENSP00000409264,ENSP00000459119,ENSP00000396730,ENSP00000398239,ENSP00000460464,ENSP00000407473,ENSP00000459124,ENSP00000350052,ENSP00000393951…	2	5	131	0.00606682	0.00101792	0.0312306	109483972
ENSP00000414272	ENSG00000072110	ACTN1	actinin, alpha 1 [Source:HGNC Symbol;Acc:HGNC:163]		0.2649379932356257	22	ENSP00000252699,ENSP00000398393,ENSP00000450925,ENSP00000450903,ENSP00000444422,ENSP00000414272,ENSP00000443495,ENSP00000452254,ENSP00000452423,ENSP00000422007,ENSP00000450618,ENSP00000193403,ENSP00000426797,ENSP00000450764,ENSP00000377941,ENSP00000439497,ENSP00000411187,ENSP00000439828,ENSP00000366035,ENSP00000355537,ENSP00000450625,ENSP00000451086	15	18	77	9.15813e-69	0.000157101	0.00699383	7.1182e+07
ENSP00000416883	ENSG00000213366	GSTM2	glutathione S-transferase mu 2 (muscle) [Source:HGNC Symbol;Acc:HGNC:4634]		0.41361256544502617	18	ENSP00000336744,ENSP00000358842,ENSP00000234981,ENSP00000241337,ENSP00000358846,ENSP00000455929,ENSP00000358828,ENSP00000416883,ENSP00000316471,ENSP00000358844,ENSP00000358851,ENSP00000311469,ENSP00000358838,ENSP00000404662,ENSP00000256593,ENSP00000358834,ENSP00000435910,ENSP00000435157	6	7	45	1.75326e-22	0.000157101	0.00699383	10350605
ENSP00000420254	ENSG00000168374	ARF4	ADP-ribosylation factor 4 [Source:HGNC Symbol;Acc:HGNC:655]		0.30708661417322836	13	ENSP00000412701,ENSP00000417501,ENSP00000475828,ENSP00000272102,ENSP00000000233,ENSP00000438507,ENSP00000440005,ENSP00000306010,ENSP00000256682,ENSP00000438063,ENSP00000420254,ENSP00000442980,ENSP00000438510	2	3	10	0.0101841	0.00235474	0.0608439	35138436
ENSP00000434015	ENSG00000179915	NRXN1	neurexin 1 [Source:HGNC Symbol;Acc:HGNC:8008]		0.11839464882943143	17	ENSP00000385434,ENSP00000384311,ENSP00000434015,ENSP00000341184,ENSP00000485887,ENSP00000385580,ENSP00000486879,ENSP00000385017,ENSP00000265459,ENSP00000386416,ENSP00000301894,ENSP00000385142,ENSP00000366774,ENSP00000486544,ENSP00000485815,ENSP00000486253,ENSP00000385681	11	12	43	5.24195e-41	0.000157101	0.00699383	1.78205e+08
ENSP00000436812	ENSG00000117983	MUC5B	mucin 5B, oligomeric mucus/gel-forming [Source:HGNC Symbol;Acc:HGNC:7516]		0.010586601874349184	4	ENSP00000478743,ENSP00000486476,ENSP00000436812,ENSP00000485659	4	5	13	2.39778e-12	0.000157101	0.00699383	5.72091e+06
ENSP00000446804	ENSG00000187109	NAP1L1	nucleosome assembly protein 1-like 1 [Source:HGNC Symbol;Acc:HGNC:7637]		0.22727272727272727	33	ENSP00000405912,ENSP00000409795,ENSP00000444759,ENSP00000483728,ENSP00000369915,ENSP00000448661,ENSP00000435327,ENSP00000382523,ENSP00000432126,ENSP00000446756,ENSP00000449649,ENSP00000261182,ENSP00000448167,ENSP00000449333,ENSP00000448133,ENSP00000477538,ENSP00000446520,ENSP00000431799,ENSP00000481412,ENSP00000387783,ENSP00000445008,ENSP00000434759,ENSP00000478654,ENSP00000450236,ENSP00000448836…	3	4	38	2.05359e-20	0.000157101	0.00699383	3.85381e+09
ENSP00000450683	ENSG00000021645	NRXN3	neurexin 3 [Source:HGNC Symbol;Acc:HGNC:8010]		0.09195402298850575	13	ENSP00000394426,ENSP00000450462,ENSP00000265459,ENSP00000451648,ENSP00000450683,ENSP00000366774,ENSP00000281127,ENSP00000386416,ENSP00000366782,ENSP00000451393,ENSP00000451672,ENSP00000338349,ENSP00000451947	10	12	40	5.3303e-23	0.000157101	0.00699383	1.77964e+08
ENSP00000451119	ENSG00000196136	SERPINA3	serpin peptidase inhibitor, clade A (alpha-1 antiproteinase, antitrypsin), member 3 [Source:HGNC Symbol;Acc:HGNC:16]		0.8682926829268293	6	ENSP00000451119,ENSP00000481617,ENSP00000450540,ENSP00000376793,ENSP00000376795,ENSP00000452246	3	32	5977	6.21965e-09	0.000460765	0.0172042	1.32884e+08
ENSP00000452662	ENSG00000242534	IGKV2D-28	immunoglobulin kappa variable 2D-28 [Source:HGNC Symbol;Acc:HGNC:5799]		0.3627450980392157	12	ENSP00000393492,ENSP00000419353,ENSP00000418138,ENSP00000452662,ENSP00000417637,ENSP00000483585,ENSP00000374803,ENSP00000418948,ENSP00000483567,ENSP00000480029,ENSP00000452747,ENSP00000409413	2	3	69	2.83881e-20	0.000157101	0.00699383	2.54908e+08
ENSP00000452747	ENSG00000251039	IGKV2D-40	immunoglobulin kappa variable 2D-40 [Source:HGNC Symbol;Acc:HGNC:5804]		0.25961538461538464	12	ENSP00000393492,ENSP00000419353,ENSP00000418138,ENSP00000409413,ENSP00000417637,ENSP00000483585,ENSP00000374803,ENSP00000418948,ENSP00000483567,ENSP00000480029,ENSP00000452747,ENSP00000452662	1	2	4	0.053342	0.0031314	0.0766336	1398340
ENSP00000472610	ENSG00000231924	PSG1	pregnancy specific beta-1-glycoprotein 1 [Source:HGNC Symbol;Acc:HGNC:9514]		0.37170263788968827	29	ENSP00000469575,ENSP00000244296,ENSP00000472284,ENSP00000385081,ENSP00000470690,ENSP00000470412,ENSP00000478484,ENSP00000471124,ENSP00000481887,ENSP00000421986,ENSP00000472423,ENSP00000270077,ENSP00000384770,ENSP00000468936,ENSP00000385869,ENSP00000480223,ENSP00000386090,ENSP00000470856,ENSP00000292125,ENSP00000485117,ENSP00000305005,ENSP00000187910,ENSP00000385386,ENSP00000472610,ENSP00000332215…	9	14	109	3.43834e-38	0.000157101	0.00699383	2834465024
ENSP00000476820	ENSG00000269113	TRABD2B	TraB domain containing 2B [Source:HGNC Symbol;Acc:HGNC:44200]		0.07736943907156674	4	ENSP00000335004,ENSP00000387183,ENSP00000476820,ENSP00000387075	2	3	9	1.31585e-07	0.000157101	0.00699383	26126620
ENSP00000478845	ENSG00000277633				0.427061310782241	33	ENSP00000483967,ENSP00000374984,ENSP00000483022,ENSP00000374991,ENSP00000375033,ENSP00000374987,ENSP00000483393,ENSP00000483165,ENSP00000483341,ENSP00000375036,ENSP00000375007,ENSP00000481569,ENSP00000481691,ENSP00000479178,ENSP00000478578,ENSP00000394447,ENSP00000484861,ENSP00000481130,ENSP00000479626,ENSP00000484069,ENSP00000478845,ENSP00000374990,ENSP00000481725,ENSP00000375024,ENSP00000374993…	1	17	796	0.00832973	0.00101792	0.0312306	NA
ENSP00000479328	ENSG00000277633				0.27380952380952384	18	ENSP00000394447,ENSP00000375036,ENSP00000481881,ENSP00000375033,ENSP00000375041,ENSP00000479328,ENSP00000485962,ENSP00000483165,ENSP00000375010,ENSP00000375007,ENSP00000477756,ENSP00000375016,ENSP00000479178,ENSP00000375024,ENSP00000483889,ENSP00000375001,ENSP00000478845,ENSP00000484861	11	12	197	7.64384e-50	0.000157101	0.00699383	4.93072e+08
ENSP00000479626	ENSG00000277633				0.19961612284069097	24	ENSP00000483967,ENSP00000374984,ENSP00000483022,ENSP00000374991,ENSP00000374987,ENSP00000483165,ENSP00000483341,ENSP00000481569,ENSP00000481691,ENSP00000479178,ENSP00000478578,ENSP00000481130,ENSP00000479626,ENSP00000375006,ENSP00000484069,ENSP00000374990,ENSP00000481725,ENSP00000374993,ENSP00000480351,ENSP00000479728,ENSP00000483889,ENSP00000478845,ENSP00000483393,ENSP00000374985	1	8	87	9.37078e-05	0.000157101	0.00699383	NA
ENSP00000001008	ENSG00000004478	FKBP4	FK506 binding protein 4, 59kDa [Source:HGNC Symbol;Acc:HGNC:3720]		0.09586056644880174	3	ENSP00000001008,ENSP00000486800,ENSP00000439703	4	4	11	7.40894e-12	0.000157101	0.00699383	43053403
ENSP00000002165	ENSG00000001036	FUCA2	fucosidase, alpha-L- 2, plasma [Source:HGNC Symbol;Acc:HGNC:4008]		0.11349036402569593	1	ENSP00000002165	6	6	55	9.25608e-17	0.000157101	0.00699383	77822940
ENSP00000002829	ENSG00000001617	SEMA3F	sema domain, immunoglobulin domain (Ig), short basic domain, secreted, (semaphorin) 3F [Source:HGNC Symbol;Acc:HGNC:10728]		0.2	7	ENSP00000002829,ENSP00000388931,ENSP00000392588,ENSP00000409859,ENSP00000400549,ENSP00000398399,ENSP00000416356	1	11	99	0.00064733	0.000460765	0.0172042	38486876
ENSP00000011292	ENSG00000091704	CPA1	carboxypeptidase A1 (pancreatic) [Source:HGNC Symbol;Acc:HGNC:2296]		0.0954653937947494	4	ENSP00000011292,ENSP00000419497,ENSP00000419408,ENSP00000475021	3	3	21	1.6134e-11	0.000157101	0.00699383	7.41542e+07
ENSP00000014930	ENSG00000013583	HEBP1	heme binding protein 1 [Source:HGNC Symbol;Acc:HGNC:17176]		0.4021164021164021	3	ENSP00000441678,ENSP00000014930,ENSP00000442020	5	5	47	5.72928e-23	0.000157101	0.00699383	347491576
ENSP00000017003	ENSG00000015532	XYLT2	xylosyltransferase II [Source:HGNC Symbol;Acc:HGNC:15517]		0.06242774566473988	3	ENSP00000017003,ENSP00000365733,ENSP00000426501	4	4	22	3.35488e-15	0.000157101	0.00699383	2.09261e+08
ENSP00000027335	ENSG00000079112	CDH17	cadherin 17, LI cadherin (liver-intestine) [Source:HGNC Symbol;Acc:HGNC:1756]		0.31009615384615385	5	ENSP00000429730,ENSP00000428189,ENSP00000392811,ENSP00000401468,ENSP00000027335	14	14	97	8.06834e-80	0.000157101	0.00699383	5.87962e+07
ENSP00000037502	ENSG00000034971	MYOC	myocilin, trabecular meshwork inducible glucocorticoid response [Source:HGNC Symbol;Acc:HGNC:7610]		0.2996031746031746	2	ENSP00000037502,ENSP00000478680	13	13	95	1.21843e-49	0.000157101	0.00699383	2811315632
ENSP00000039007	ENSG00000036473	OTC	ornithine carbamoyltransferase [Source:HGNC Symbol;Acc:HGNC:8512]		0.09322033898305085	1	ENSP00000039007	3	3	17	2.85865e-10	0.000157101	0.00699383	12910289
ENSP00000040663	ENSG00000037757	MRI1	methylthioribose-1-phosphate isomerase 1 [Source:HGNC Symbol;Acc:HGNC:28469]		0.08130081300813008	2	ENSP00000314871,ENSP00000040663	2	2	10	4.05101e-09	0.000157101	0.00699383	1.05136e+08
ENSP00000043402	ENSG00000040608	RTN4R	reticulon 4 receptor [Source:HGNC Symbol;Acc:HGNC:18601]		0.09725158562367865	3	ENSP00000403535,ENSP00000043402,ENSP00000396872	3	3	29	2.6746e-15	0.000157101	0.00699383	1137266160
ENSP00000046794	ENSG00000043462	LCP2	lymphocyte cytosolic protein 2 (SH2 domain containing leukocyte protein of 76kDa) [Source:HGNC Symbol;Acc:HGNC:6529]		0.020637898686679174	2	ENSP00000487460,ENSP00000046794	1	1	1	0.0010694	0.000460765	0.0172042	NA
ENSP00000053867	ENSG00000030582	GRN	granulin [Source:HGNC Symbol;Acc:HGNC:4601]		0.16188870151770657	14	ENSP00000467837,ENSP00000466271,ENSP00000466611,ENSP00000467022,ENSP00000465518,ENSP00000465375,ENSP00000467616,ENSP00000465673,ENSP00000467431,ENSP00000466405,ENSP00000468318,ENSP00000053867,ENSP00000466956,ENSP00000467870	6	6	59	1.74921e-23	0.000157101	0.00699383	9.23887e+07
ENSP00000054216	ENSG00000049130	KITLG	KIT ligand [Source:HGNC Symbol;Acc:HGNC:6343]		0.16326530612244897	2	ENSP00000054216,ENSP00000228280	2	2	7	1.6872e-05	0.000157101	0.00699383	19217382
ENSP00000054950	ENSG00000049449	RCN1	reticulocalbin 1, EF-hand calcium binding domain [Source:HGNC Symbol;Acc:HGNC:9934]		0.338368580060423	3	ENSP00000054950,ENSP00000436422,ENSP00000436482	10	10	92	8.43303e-30	0.000157101	0.00699383	3.13969e+08
ENSP00000064571	ENSG00000054803	CBLN4	cerebellin 4 precursor [Source:HGNC Symbol;Acc:HGNC:16231]		0.1691542288557214	1	ENSP00000064571	4	4	89	2.96372e-25	0.000157101	0.00699383	1.23806e+08
ENSP00000162749	ENSG00000067182	TNFRSF1A	tumor necrosis factor receptor superfamily, member 1A [Source:HGNC Symbol;Acc:HGNC:11916]		0.10989010989010989	6	ENSP00000438343,ENSP00000162749,ENSP00000413224,ENSP00000442919,ENSP00000442059,ENSP00000380389	5	5	11	2.25571e-17	0.000157101	0.00699383	2.39217e+06
ENSP00000167586	ENSG00000186847	KRT14	keratin 14, type I [Source:HGNC Symbol;Acc:HGNC:6416]		0.4258474576271186	41	ENSP00000308452,ENSP00000264651,ENSP00000466625,ENSP00000225899,ENSP00000246635,ENSP00000225550,ENSP00000377616,ENSP00000485008,ENSP00000251645,ENSP00000467418,ENSP00000167588,ENSP00000441751,ENSP00000336604,ENSP00000460501,ENSP00000447278,ENSP00000251646,ENSP00000167586,ENSP00000246639,ENSP00000246646,ENSP00000468221,ENSP00000409282,ENSP00000377555,ENSP00000467124,ENSP00000305263,ENSP00000408759…	7	20	224	2.19363e-25	0.000157101	0.00699383	1.35013e+08
ENSP00000168148	ENSG00000072080	SPP2	secreted phosphoprotein 2, 24kDa [Source:HGNC Symbol;Acc:HGNC:11256]		0.22748815165876776	3	ENSP00000362466,ENSP00000417036,ENSP00000168148	6	6	35	5.76033e-32	0.000157101	0.00699383	6.05615e+07
ENSP00000170150	ENSG00000078898	BPIFB2	BPI fold containing family B, member 2 [Source:HGNC Symbol;Acc:HGNC:16177]		0.039301310043668124	1	ENSP00000170150	1	1	1	0.00109625	0.000460765	0.0172042	NA
ENSP00000173527	ENSG00000066583	ISOC1	isochorismatase domain containing 1 [Source:HGNC Symbol;Acc:HGNC:24254]		0.11409395973154363	2	ENSP00000421273,ENSP00000173527	2	2	8	2.06614e-11	0.000157101	0.00699383	3.63313e+07
ENSP00000176763	ENSG00000072786	STK10	serine/threonine kinase 10 [Source:HGNC Symbol;Acc:HGNC:11388]		0.015495867768595042	1	ENSP00000176763	1	1	3	5.92524e-05	0.000157101	0.00699383	NA
ENSP00000181383	ENSG00000080618	CPB2	carboxypeptidase B2 (plasma) [Source:HGNC Symbol;Acc:HGNC:2300]		0.2647754137115839	2	ENSP00000400714,ENSP00000181383	9	9	1186	2.61116e-51	0.000157101	0.00699383	1.49218e+10
ENSP00000190983	ENSG00000064205	WISP2	WNT1 inducible signaling pathway protein 2 [Source:HGNC Symbol;Acc:HGNC:12770]		0.18	3	ENSP00000361959,ENSP00000361956,ENSP00000190983	2	2	7	3.81362e-06	0.000157101	0.00699383	3.63261e+07
ENSP00000191018	ENSG00000064601	CTSA	cathepsin A [Source:HGNC Symbol;Acc:HGNC:9251]		0.08958333333333333	5	ENSP00000346952,ENSP00000361537,ENSP00000408533,ENSP00000361562,ENSP00000191018	4	4	32	6.87213e-19	0.000157101	0.00699383	4.10839e+07
ENSP00000196061	ENSG00000083444	PLOD1	procollagen-lysine, 2-oxoglutarate 5-dioxygenase 1 [Source:HGNC Symbol;Acc:HGNC:9081]		0.1815680880330124	3	ENSP00000405372,ENSP00000196061,ENSP00000414443	9	9	36	9.71063e-34	0.000157101	0.00699383	1.54914e+08
ENSP00000196371	ENSG00000083720	OXCT1	3-oxoacid CoA transferase 1 [Source:HGNC Symbol;Acc:HGNC:8527]		0.04423076923076923	2	ENSP00000196371,ENSP00000425348	2	2	5	8.2675e-08	0.000157101	0.00699383	4979286
ENSP00000199708	ENSG00000086506	HBQ1	hemoglobin, theta 1 [Source:HGNC Symbol;Acc:HGNC:4833]		0.07746478873239436	1	ENSP00000199708	1	1	1	0.0309816	0.00261622	0.0661527	NA
ENSP00000200639	ENSG00000005893	LAMP2	lysosomal-associated membrane protein 2 [Source:HGNC Symbol;Acc:HGNC:6501]		0.0951219512195122	4	ENSP00000431526,ENSP00000200639,ENSP00000408411,ENSP00000360386	3	3	159	4.54303e-12	0.000157101	0.00699383	1957672832
ENSP00000200676	ENSG00000087237	CETP	cholesteryl ester transfer protein, plasma [Source:HGNC Symbol;Acc:HGNC:1869]		0.17038539553752535	3	ENSP00000369106,ENSP00000200676,ENSP00000456276	6	6	60	6.41479e-26	0.000157101	0.00699383	2.07815e+08
ENSP00000204679	ENSG00000090581	GNPTG	N-acetylglucosamine-1-phosphate transferase, gamma subunit [Source:HGNC Symbol;Acc:HGNC:23026]		0.25573770491803277	5	ENSP00000480060,ENSP00000204679,ENSP00000460728,ENSP00000434413,ENSP00000435349	5	5	99	1.60606e-37	0.000157101	0.00699383	8.7785e+07
ENSP00000204961	ENSG00000090776	EFNB1	ephrin-B1 [Source:HGNC Symbol;Acc:HGNC:3226]		0.11560693641618497	1	ENSP00000204961	4	4	7	3.69925e-06	0.000460765	0.0172042	2.93438e+07
ENSP00000205948	ENSG00000091583	APOH	apolipoprotein H (beta-2-glycoprotein I) [Source:HGNC Symbol;Acc:HGNC:616]		0.6550724637681159	4	ENSP00000464301,ENSP00000205948,ENSP00000463553,ENSP00000462260	26	26	10756	7.6503e-133	0.000157101	0.00699383	19072754688
ENSP00000206423	ENSG00000091986	CCDC80	coiled-coil domain containing 80 [Source:HGNC Symbol;Acc:HGNC:30649]		0.06315789473684211	2	ENSP00000411814,ENSP00000206423	5	5	22	2.12156e-12	0.000157101	0.00699383	1.07185e+08
ENSP00000206765	ENSG00000092295	TGM1	transglutaminase 1 [Source:HGNC Symbol;Acc:HGNC:11777]		0.09424724602203183	3	ENSP00000439446,ENSP00000206765,ENSP00000453840	5	5	8	1.22702e-09	0.000157101	0.00699383	4.82286e+06
ENSP00000207549	ENSG00000092929	UNC13D	unc-13 homolog D (C. elegans) [Source:HGNC Symbol;Acc:HGNC:23147]		0.029357798165137616	5	ENSP00000388093,ENSP00000466826,ENSP00000466758,ENSP00000467653,ENSP00000207549	3	3	5	1.77677e-11	0.000157101	0.00699383	10967053
ENSP00000209668	ENSG00000187758	ADH1A	alcohol dehydrogenase 1A (class I), alpha polypeptide [Source:HGNC Symbol;Acc:HGNC:249]		0.14666666666666667	7	ENSP00000486614,ENSP00000209668,ENSP00000478439,ENSP00000478545,ENSP00000378351,ENSP00000306606,ENSP00000426083	1	4	21	5.52492e-06	0.000157101	0.00699383	2.62296e+07
ENSP00000210444	ENSG00000095380	NANS	N-acetylneuraminic acid synthase [Source:HGNC Symbol;Acc:HGNC:19237]		0.12534818941504178	3	ENSP00000404642,ENSP00000210444,ENSP00000404107	3	3	17	2.82277e-12	0.000157101	0.00699383	2.72264e+07
ENSP00000211379	ENSG00000204463	BAG6	BCL2-associated athanogene 6 [Source:HGNC Symbol;Acc:HGNC:13919]		0.03463587921847247	49	ENSP00000479238,ENSP00000390966,ENSP00000365131,ENSP00000414148,ENSP00000354368,ENSP00000412110,ENSP00000446525,ENSP00000402856,ENSP00000397894,ENSP00000394801,ENSP00000415427,ENSP00000410156,ENSP00000408761,ENSP00000408946,ENSP00000413698,ENSP00000415330,ENSP00000398547,ENSP00000416540,ENSP00000447946,ENSP00000354875,ENSP00000372938,ENSP00000407701,ENSP00000413225,ENSP00000482413,ENSP00000416633…	3	3	4	7.82004e-06	0.000460765	0.0172042	5.2009e+06
ENSP00000215375	ENSG00000099624	ATP5D	ATP synthase, H+ transporting, mitochondrial F1 complex, delta subunit [Source:HGNC Symbol;Acc:HGNC:837]		0.08333333333333333	3	ENSP00000378995,ENSP00000215375,ENSP00000464863	1	1	1	9.085e-05	0.000157101	0.00699383	1220150
ENSP00000215539	ENSG00000099769	IGFALS	insulin-like growth factor binding protein, acid labile subunit [Source:HGNC Symbol;Acc:HGNC:5468]		0.3421487603305785	2	ENSP00000416683,ENSP00000215539	14	14	1189	2.90174e-62	0.000157101	0.00699383	18486293504
ENSP00000215727	ENSG00000099937	SERPIND1	serpin peptidase inhibitor, clade D (heparin cofactor), member 1 [Source:HGNC Symbol;Acc:HGNC:4838]		0.5090180360721442	2	ENSP00000384050,ENSP00000215727	33	33	2688	1.27372e-140	0.000157101	0.00699383	1.60024e+10
ENSP00000215793	ENSG00000099995	SF3A1	splicing factor 3a, subunit 1, 120kDa [Source:HGNC Symbol;Acc:HGNC:10765]		0.015132408575031526	1	ENSP00000215793	2	2	5	0.0148028	0.00287992	0.0716254	8.15469e+06
ENSP00000215832	ENSG00000100030	MAPK1	mitogen-activated protein kinase 1 [Source:HGNC Symbol;Acc:HGNC:6871]		0.07222222222222222	3	ENSP00000381803,ENSP00000215832,ENSP00000440842	3	3	80	0.000135036	0.000460765	0.0172042	2.46655e+09
ENSP00000215904	ENSG00000241360	PDXP	pyridoxal (pyridoxine, vitamin B6) phosphatase [Source:HGNC Symbol;Acc:HGNC:30259]		0.1891891891891892	1	ENSP00000215904	4	4	7	3.54223e-21	0.000157101	0.00699383	1.67806e+08
ENSP00000215909	ENSG00000100097	LGALS1	lectin, galactoside-binding, soluble, 1 [Source:HGNC Symbol;Acc:HGNC:6561]		0.37037037037037035	1	ENSP00000215909	4	4	82	4.51468e-17	0.000157101	0.00699383	7.28046e+07
ENSP00000216129	ENSG00000100304	TTLL12	tubulin tyrosine ligase-like family member 12 [Source:HGNC Symbol;Acc:HGNC:28974]		0.11024844720496894	2	ENSP00000476297,ENSP00000216129	4	4	8	7.71901e-11	0.000157101	0.00699383	2.94383e+06
ENSP00000216254	ENSG00000100412	ACO2	aconitase 2, mitochondrial [Source:HGNC Symbol;Acc:HGNC:118]		0.041025641025641026	2	ENSP00000216254,ENSP00000379769	2	2	4	8.49992e-07	0.000460765	0.0172042	2794082
ENSP00000216281	ENSG00000080824	HSP90AA1	heat shock protein 90kDa alpha (cytosolic), class A member 1 [Source:HGNC Symbol;Acc:HGNC:5253]		0.41939890710382516	7	ENSP00000360709,ENSP00000216281,ENSP00000450712,ENSP00000360609,ENSP00000325875,ENSP00000335153,ENSP00000481908	16	29	169	2.00172e-70	0.000157101	0.00699383	6.40111e+08
ENSP00000216286	ENSG00000087303	NID2	nidogen 2 (osteonidogen) [Source:HGNC Symbol;Acc:HGNC:13389]		0.16072727272727272	4	ENSP00000216286,ENSP00000443730,ENSP00000452190,ENSP00000482803	14	14	80	1.36574e-62	0.000157101	0.00699383	1.91509e+08
ENSP00000216455	ENSG00000100567	PSMA3	proteasome (prosome, macropain) subunit, alpha type, 3 [Source:HGNC Symbol;Acc:HGNC:9532]		0.21176470588235294	3	ENSP00000216455,ENSP00000390491,ENSP00000452056	3	3	17	0.00121171	0.00101792	0.0312306	9773099
ENSP00000216492	ENSG00000100604	CHGA	chromogranin A [Source:HGNC Symbol;Acc:HGNC:1929]		0.6323851203501094	4	ENSP00000478198,ENSP00000486710,ENSP00000216492,ENSP00000334023	23	23	322	1.10354e-119	0.000157101	0.00699383	8.23796e+09
ENSP00000216554	ENSG00000100664	EIF5	eukaryotic translation initiation factor 5 [Source:HGNC Symbol;Acc:HGNC:3299]		0.04640371229698376	8	ENSP00000453743,ENSP00000452883,ENSP00000453633,ENSP00000453856,ENSP00000453468,ENSP00000216554,ENSP00000376477,ENSP00000453396	2	2	3	0.000957518	0.00101792	0.0312306	7949257
ENSP00000216605	ENSG00000100714	MTHFD1	methylenetetrahydrofolate dehydrogenase (NADP+ dependent) 1, methenyltetrahydrofolate cyclohydrolase, formyltetrahydrofolate synthetase [Source:HGNC Symbol;Acc:HGNC:7432]		0.14866310160427806	4	ENSP00000216605,ENSP00000450560,ENSP00000438588,ENSP00000477199	10	10	49	2.98555e-31	0.000157101	0.00699383	4.34292e+08
ENSP00000216780	ENSG00000100889	PCK2	phosphoenolpyruvate carboxykinase 2 (mitochondrial) [Source:HGNC Symbol;Acc:HGNC:8725]		0.1265625	9	ENSP00000453751,ENSP00000453998,ENSP00000453656,ENSP00000453444,ENSP00000380171,ENSP00000441826,ENSP00000454011,ENSP00000453528,ENSP00000216780	5	5	14	7.41077e-15	0.000157101	0.00699383	1.5529e+08
ENSP00000216802	ENSG00000100911	PSME2	proteasome (prosome, macropain) activator subunit 2 (PA28 beta) [Source:HGNC Symbol;Acc:HGNC:9569]		0.34309623430962344	4	ENSP00000484569,ENSP00000216802,ENSP00000453487,ENSP00000452940	6	6	47	4.71281e-30	0.000157101	0.00699383	3.66134e+08
ENSP00000216879	ENSG00000088833	NSFL1C	NSFL1 (p97) cofactor (p47) [Source:HGNC Symbol;Acc:HGNC:15912]		0.2756756756756757	8	ENSP00000473400,ENSP00000434067,ENSP00000338643,ENSP00000451675,ENSP00000418529,ENSP00000452019,ENSP00000216879,ENSP00000473616	8	8	74	4.1112e-26	0.000157101	0.00699383	4.50998e+08
ENSP00000216951	ENSG00000100983	GSS	glutathione synthetase [Source:HGNC Symbol;Acc:HGNC:4624]		0.24261603375527427	2	ENSP00000407517,ENSP00000216951	10	10	92	3.20254e-40	0.000157101	0.00699383	1734528976
ENSP00000216962	ENSG00000100994	PYGB	phosphorylase, glycogen; brain [Source:HGNC Symbol;Acc:HGNC:9723]		0.199288256227758	7	ENSP00000216962,ENSP00000164139,ENSP00000443787,ENSP00000216392,ENSP00000431657,ENSP00000366650,ENSP00000395451	10	13	36	7.22602e-29	0.000157101	0.00699383	2.5168e+09
ENSP00000216968	ENSG00000101000	PROCR	protein C receptor, endothelial [Source:HGNC Symbol;Acc:HGNC:9452]		0.12605042016806722	1	ENSP00000216968	3	3	40	1.58274e-11	0.000157101	0.00699383	3217947536
ENSP00000217131	ENSG00000101160	CTSZ	cathepsin Z [Source:HGNC Symbol;Acc:HGNC:2547]		0.056105610561056105	1	ENSP00000217131	1	1	29	1.67554e-08	0.000157101	0.00699383	16697256
ENSP00000217133	ENSG00000101162	TUBB1	tubulin, beta 1 class VI [Source:HGNC Symbol;Acc:HGNC:16257]		0.22394678492239467	1	ENSP00000217133	5	5	30	1.6263e-14	0.000460765	0.0172042	6.54527e+07
ENSP00000217402	ENSG00000101421	CHMP4B	charged multivesicular body protein 4B [Source:HGNC Symbol;Acc:HGNC:16171]		0.0625	1	ENSP00000217402	1	1	4	1.19105e-05	0.000157101	0.00699383	397534
ENSP00000217407	ENSG00000129988	LBP	lipopolysaccharide binding protein [Source:HGNC Symbol;Acc:HGNC:6517]		0.09355509355509356	1	ENSP00000217407	5	5	550	5.4022e-23	0.000157101	0.00699383	8.67662e+09
ENSP00000217423	ENSG00000101441	CST4	cystatin S [Source:HGNC Symbol;Acc:HGNC:2476]		0.2907801418439716	2	ENSP00000217423,ENSP00000307540	2	3	11	3.54992e-10	0.000157101	0.00699383	3.80479e+07
ENSP00000217426	ENSG00000101444	AHCY	adenosylhomocysteinase [Source:HGNC Symbol;Acc:HGNC:343]		0.09953703703703703	2	ENSP00000217426,ENSP00000442820	6	6	42	1.78385e-19	0.000157101	0.00699383	49925300
ENSP00000217652	ENSG00000101608	MYL12A	myosin, light chain 12A, regulatory, non-sarcomeric [Source:HGNC Symbol;Acc:HGNC:16701]		0.4502923976608187	12	ENSP00000464464,ENSP00000217313,ENSP00000463614,ENSP00000237500,ENSP00000462171,ENSP00000217652,ENSP00000464359,ENSP00000463559,ENSP00000279022,ENSP00000441231,ENSP00000463009,ENSP00000383037	1	9	45	0.00123328	0.000460765	0.0172042	2620503
ENSP00000217939	ENSG00000101825	MXRA5	matrix-remodelling associated 5 [Source:HGNC Symbol;Acc:HGNC:7539]		0.05693069306930693	1	ENSP00000217939	11	11	56	8.23623e-43	0.000157101	0.00699383	1126095504
ENSP00000218099	ENSG00000101981	F9	coagulation factor IX [Source:HGNC Symbol;Acc:HGNC:3551]		0.368763557483731	2	ENSP00000218099,ENSP00000377650	16	16	477	1.77006e-65	0.000157101	0.00699383	3603066368
ENSP00000218230	ENSG00000102109	PCSK1N	proprotein convertase subtilisin/kexin type 1 inhibitor [Source:HGNC Symbol;Acc:HGNC:17301]		0.3038461538461538	1	ENSP00000218230	4	4	23	6.9886e-20	0.000157101	0.00699383	2.71769e+08
ENSP00000218340	ENSG00000102218	RP2	retinitis pigmentosa 2 (X-linked recessive) [Source:HGNC Symbol;Acc:HGNC:10274]		0.04	1	ENSP00000218340	1	1	3	0.000182936	0.000460765	0.0172042	2923573
ENSP00000218516	ENSG00000102393	GLA	galactosidase, alpha [Source:HGNC Symbol;Acc:HGNC:4296]		0.19813519813519814	2	ENSP00000476935,ENSP00000218516	7	7	28	9.84069e-24	0.000157101	0.00699383	100374168
ENSP00000218758	ENSG00000102575	ACP5	acid phosphatase 5, tartrate resistant [Source:HGNC Symbol;Acc:HGNC:124]		0.07384615384615385	5	ENSP00000465127,ENSP00000413456,ENSP00000468767,ENSP00000392374,ENSP00000218758	2	2	7	1.31337e-08	0.000157101	0.00699383	4.44827e+06
ENSP00000219022	ENSG00000102837	OLFM4	olfactomedin 4 [Source:HGNC Symbol;Acc:HGNC:17190]		0.10588235294117647	1	ENSP00000219022	3	3	3	1.50104e-10	0.000157101	0.00699383	3939204
ENSP00000219070	ENSG00000087245	MMP2	matrix metallopeptidase 2 [Source:HGNC Symbol;Acc:HGNC:7166]		0.46060606060606063	8	ENSP00000456518,ENSP00000219070,ENSP00000260227,ENSP00000394237,ENSP00000461421,ENSP00000456096,ENSP00000444143,ENSP00000457949	25	26	293	1.42008e-108	0.000157101	0.00699383	5.32793e+09
ENSP00000219150	ENSG00000102879	CORO1A	coronin, actin binding protein, 1A [Source:HGNC Symbol;Acc:HGNC:2252]		0.1301518438177874	8	ENSP00000457509,ENSP00000456756,ENSP00000455552,ENSP00000219150,ENSP00000456457,ENSP00000457332,ENSP00000454752,ENSP00000456266	4	4	28	8.38817e-20	0.000157101	0.00699383	28885194
ENSP00000219169	ENSG00000102898	NUTF2	nuclear transport factor 2 [Source:HGNC Symbol;Acc:HGNC:13722]		0.23622047244094488	4	ENSP00000457022,ENSP00000219169,ENSP00000457989,ENSP00000456428	3	3	30	1.48937e-13	0.000157101	0.00699383	5.61986e+07
ENSP00000219197	ENSG00000102924	CBLN1	cerebellin 1 precursor [Source:HGNC Symbol;Acc:HGNC:1543]		0.31088082901554404	3	ENSP00000455718,ENSP00000444651,ENSP00000219197	5	5	30	2.25118e-32	0.000157101	0.00699383	2.53089e+08
ENSP00000219345	ENSG00000103066	PLA2G15	phospholipase A2, group XV [Source:HGNC Symbol;Acc:HGNC:17163]		0.18689320388349515	7	ENSP00000454227,ENSP00000394197,ENSP00000393610,ENSP00000455461,ENSP00000457034,ENSP00000454557,ENSP00000219345	4	4	52	3.19789e-14	0.000157101	0.00699383	3.1935e+08
ENSP00000220003	ENSG00000103653	CSK	c-src tyrosine kinase [Source:HGNC Symbol;Acc:HGNC:2444]		0.03111111111111111	3	ENSP00000454906,ENSP00000220003,ENSP00000414764	1	1	2	0.000317477	0.000460765	0.0172042	530536
ENSP00000220478	ENSG00000104112	SCG3	secretogranin III [Source:HGNC Symbol;Acc:HGNC:13707]		0.37606837606837606	3	ENSP00000220478,ENSP00000445205,ENSP00000452745	11	11	75	1.52052e-55	0.000157101	0.00699383	912995232
ENSP00000220616	ENSG00000042832	TG	thyroglobulin [Source:HGNC Symbol;Acc:HGNC:11764]		0.03684971098265896	4	ENSP00000430161,ENSP00000220616,ENSP00000430523,ENSP00000430430	8	8	16	2.57819e-28	0.000157101	0.00699383	2.14714e+07
ENSP00000220763	ENSG00000104324	CPQ	carboxypeptidase Q [Source:HGNC Symbol;Acc:HGNC:16910]		0.1652542372881356	5	ENSP00000220763,ENSP00000429146,ENSP00000431024,ENSP00000431114,ENSP00000429934	11	11	146	1.04629e-38	0.000157101	0.00699383	1.08836e+09
ENSP00000221130	ENSG00000104687	GSR	glutathione reductase [Source:HGNC Symbol;Acc:HGNC:4623]		0.22796934865900384	4	ENSP00000438845,ENSP00000445516,ENSP00000221130,ENSP00000444559	6	6	78	1.36765e-39	0.000157101	0.00699383	2.88732e+08
ENSP00000221363	ENSG00000104774	MAN2B1	mannosidase, alpha, class 2B, member 1 [Source:HGNC Symbol;Acc:HGNC:6826]		0.07920792079207921	4	ENSP00000470533,ENSP00000472710,ENSP00000395473,ENSP00000221363	7	7	28	6.26609e-24	0.000157101	0.00699383	2.47503e+08
ENSP00000221466	ENSG00000104870	FCGRT	Fc fragment of IgG, receptor, transporter, alpha [Source:HGNC Symbol;Acc:HGNC:3621]		0.2219178082191781	10	ENSP00000410798,ENSP00000472604,ENSP00000471232,ENSP00000469933,ENSP00000221466,ENSP00000469968,ENSP00000472350,ENSP00000472256,ENSP00000471118,ENSP00000472794	5	5	34	1.12905e-25	0.000157101	0.00699383	127008488
ENSP00000221476	ENSG00000104879	CKM	creatine kinase, muscle [Source:HGNC Symbol;Acc:HGNC:1994]		0.5039370078740157	15	ENSP00000404203,ENSP00000406577,ENSP00000300283,ENSP00000451904,ENSP00000221476,ENSP00000410289,ENSP00000451426,ENSP00000413165,ENSP00000254035,ENSP00000486477,ENSP00000413255,ENSP00000451680,ENSP00000299198,ENSP00000416717,ENSP00000487331	14	15	241	2.1669e-54	0.000157101	0.00699383	878509952
ENSP00000221496	ENSG00000104899	AMH	anti-Mullerian hormone [Source:HGNC Symbol;Acc:HGNC:464]		0.1392857142857143	1	ENSP00000221496	5	5	17	2.68027e-12	0.000157101	0.00699383	2.97068e+07
ENSP00000221566	ENSG00000104969	SGTA	small glutamine-rich tetratricopeptide repeat (TPR)-containing, alpha [Source:HGNC Symbol;Acc:HGNC:10819]		0.07987220447284345	2	ENSP00000221566,ENSP00000466461	2	2	5	2.52092e-08	0.000157101	0.00699383	5.02542e+06
ENSP00000221891	ENSG00000105290	APLP1	amyloid beta (A4) precursor-like protein 1 [Source:HGNC Symbol;Acc:HGNC:597]		0.1443932411674347	8	ENSP00000474762,ENSP00000399013,ENSP00000441501,ENSP00000467854,ENSP00000465694,ENSP00000466576,ENSP00000221891,ENSP00000466116	1	9	41	0.0404424	0.00287992	0.0716254	1.43409e+08
ENSP00000221930	ENSG00000105329	TGFB1	transforming growth factor, beta 1 [Source:HGNC Symbol;Acc:HGNC:11766]		0.20512820512820512	2	ENSP00000221930,ENSP00000472767	9	9	41	8.8412e-29	0.000157101	0.00699383	478723546
ENSP00000221980	ENSG00000105376	ICAM5	intercellular adhesion molecule 5, telencephalin [Source:HGNC Symbol;Acc:HGNC:5348]		0.08766233766233766	1	ENSP00000221980	5	5	16	5.61738e-24	0.000157101	0.00699383	10046039
ENSP00000222005	ENSG00000105401	CDC37	cell division cycle 37 [Source:HGNC Symbol;Acc:HGNC:1735]		0.18783068783068782	5	ENSP00000222005,ENSP00000465941,ENSP00000467747,ENSP00000464889,ENSP00000465724	5	5	20	4.95623e-17	0.000157101	0.00699383	62682288
ENSP00000222374	ENSG00000105767	CADM4	cell adhesion molecule 4 [Source:HGNC Symbol;Acc:HGNC:30825]		0.13917525773195877	1	ENSP00000222374	3	3	17	1.03056e-21	0.000157101	0.00699383	622083283
ENSP00000222381	ENSG00000005421	PON1	paraoxonase 1 [Source:HGNC Symbol;Acc:HGNC:9204]		0.5943661971830986	2	ENSP00000222381,ENSP00000407359	14	14	1154	6.30862e-91	0.000157101	0.00699383	6.78617e+09
ENSP00000222399	ENSG00000091136	LAMB1	laminin, beta 1 [Source:HGNC Symbol;Acc:HGNC:6486]		0.34434490481522956	3	ENSP00000222399,ENSP00000377190,ENSP00000377191	42	42	393	2.96957e-158	0.000157101	0.00699383	1075578112
ENSP00000222553	ENSG00000105835	NAMPT	nicotinamide phosphoribosyltransferase [Source:HGNC Symbol;Acc:HGNC:30092]		0.09979633401221996	3	ENSP00000222553,ENSP00000346242,ENSP00000390591	4	4	17	1.74316e-13	0.000157101	0.00699383	19215349
ENSP00000222968	ENSG00000106244	PDAP1	PDGFA associated protein 1 [Source:HGNC Symbol;Acc:HGNC:14634]		0.2154696132596685	3	ENSP00000486021,ENSP00000411287,ENSP00000222968	3	3	21	2.35038e-11	0.000157101	0.00699383	1.14832e+08
ENSP00000223061	ENSG00000106333	PCOLCE	procollagen C-endopeptidase enhancer [Source:HGNC Symbol;Acc:HGNC:8738]		0.3741648106904232	1	ENSP00000223061	12	12	366	1.14437e-68	0.000157101	0.00699383	1.82918e+09
ENSP00000223095	ENSG00000106366	SERPINE1	serpin peptidase inhibitor, clade E (nexin, plasminogen activator inhibitor type 1), member 1 [Source:HGNC Symbol;Acc:HGNC:8583]		0.0472636815920398	1	ENSP00000223095	2	2	14	0.00229913	0.00235474	0.0608439	4.6958e+07
ENSP00000223127	ENSG00000106397	PLOD3	procollagen-lysine, 2-oxoglutarate 5-dioxygenase 3 [Source:HGNC Symbol;Acc:HGNC:9083]		0.08401084010840108	4	ENSP00000394045,ENSP00000407555,ENSP00000223127,ENSP00000407908	5	5	29	7.35926e-17	0.000157101	0.00699383	1.55214e+08
ENSP00000223271	ENSG00000106538	RARRES2	retinoic acid receptor responder (tazarotene induced) 2 [Source:HGNC Symbol;Acc:HGNC:9868]		0.0736196319018405	3	ENSP00000418009,ENSP00000418483,ENSP00000223271	1	1	17	3.37207e-05	0.000157101	0.00699383	1.14335e+08
ENSP00000223321	ENSG00000106588	PSMA2	proteasome (prosome, macropain) subunit, alpha type, 2 [Source:HGNC Symbol;Acc:HGNC:9531]		0.2094017094017094	3	ENSP00000223321,ENSP00000404858,ENSP00000455744	3	3	46	3.11753e-13	0.000157101	0.00699383	259190976
ENSP00000223642	ENSG00000106804	C5	complement component 5 [Source:HGNC Symbol;Acc:HGNC:1331]		0.6157517899761337	1	ENSP00000223642	114	114	8205	0	0.000157101	0.00699383	2.30191e+10
ENSP00000224181	ENSG00000176919	C8G	complement component 8, gamma polypeptide [Source:HGNC Symbol;Acc:HGNC:1354]		0.3415841584158416	2	ENSP00000224181,ENSP00000360697	8	8	1106	1.23968e-34	0.000157101	0.00699383	8.14295e+09
ENSP00000224237	ENSG00000026025	VIM	vimentin [Source:HGNC Symbol;Acc:HGNC:12692]		0.43776824034334766	22	ENSP00000447402,ENSP00000431702,ENSP00000358865,ENSP00000482169,ENSP00000446007,ENSP00000435613,ENSP00000329243,ENSP00000363071,ENSP00000437182,ENSP00000224237,ENSP00000481793,ENSP00000427872,ENSP00000391842,ENSP00000257951,ENSP00000410137,ENSP00000221166,ENSP00000412295,ENSP00000311997,ENSP00000449404,ENSP00000293308,ENSP00000257860,ENSP00000447566	14	17	103	9.48634e-39	0.000157101	0.00699383	6.00939e+07
ENSP00000224721	ENSG00000107736	CDH23	cadherin-related 23 [Source:HGNC Symbol;Acc:HGNC:13733]		0.0754994124559342	12	ENSP00000483211,ENSP00000381789,ENSP00000381768,ENSP00000299366,ENSP00000473454,ENSP00000473539,ENSP00000224721,ENSP00000381822,ENSP00000388894,ENSP00000480146,ENSP00000478374,ENSP00000482036	12	20	156	2.09839e-47	0.000157101	0.00699383	3.78259e+09
ENSP00000225275	ENSG00000005381	MPO	myeloperoxidase [Source:HGNC Symbol;Acc:HGNC:7218]		0.2040268456375839	2	ENSP00000225275,ENSP00000464668	12	12	87	7.64286e-54	0.000157101	0.00699383	3.72955e+09
ENSP00000225519	ENSG00000197417	SHPK	sedoheptulokinase [Source:HGNC Symbol;Acc:HGNC:1492]		0.08786610878661087	2	ENSP00000225519,ENSP00000461416	3	3	5	4.13115e-09	0.000157101	0.00699383	1.45937e+06
ENSP00000225719	ENSG00000108582	CPD	carboxypeptidase D [Source:HGNC Symbol;Acc:HGNC:2301]		0.16014492753623188	3	ENSP00000444443,ENSP00000225719,ENSP00000463763	14	14	97	3.54585e-58	0.000157101	0.00699383	6524181488
ENSP00000225927	ENSG00000108784	NAGLU	N-acetylglucosaminidase, alpha [Source:HGNC Symbol;Acc:HGNC:7632]		0.19246298788694483	1	ENSP00000225927	10	10	128	1.17737e-40	0.000157101	0.00699383	4189017472
ENSP00000225964	ENSG00000108821	COL1A1	collagen, type I, alpha 1 [Source:HGNC Symbol;Acc:HGNC:2197]		0.04644808743169399	2	ENSP00000460459,ENSP00000225964	6	6	31	1.69992e-20	0.000157101	0.00699383	2.25412e+08
ENSP00000226218	ENSG00000109072	VTN	vitronectin [Source:HGNC Symbol;Acc:HGNC:12724]		0.7426778242677824	3	ENSP00000452347,ENSP00000440439,ENSP00000226218	44	44	7615	3.50481e-256	0.000157101	0.00699383	25988762624
ENSP00000226253	ENSG00000109107	ALDOC	aldolase C, fructose-bisphosphate [Source:HGNC Symbol;Acc:HGNC:418]		0.554945054945055	18	ENSP00000455724,ENSP00000378729,ENSP00000462674,ENSP00000455917,ENSP00000463174,ENSP00000455800,ENSP00000336927,ENSP00000457468,ENSP00000455700,ENSP00000465623,ENSP00000398976,ENSP00000226253,ENSP00000455857,ENSP00000378669,ENSP00000455455,ENSP00000463118,ENSP00000378731,ENSP00000400452	12	14	250	1.05585e-44	0.000157101	0.00699383	1.80695e+09
ENSP00000226355	ENSG00000079557	AFM	afamin [Source:HGNC Symbol;Acc:HGNC:316]		0.48747913188647746	1	ENSP00000226355	40	40	4347	6.11785e-185	0.000157101	0.00699383	1.89644e+10
ENSP00000226522	ENSG00000109270	LAMTOR3	late endosomal/lysosomal adaptor, MAPK and MTOR activator 3 [Source:HGNC Symbol;Acc:HGNC:15606]		0.08547008547008547	2	ENSP00000424183,ENSP00000226522	1	1	6	0.0657598	0.00443372	0.102239	1.9409e+07
ENSP00000226524	ENSG00000109272	PF4V1	platelet factor 4 variant 1 [Source:HGNC Symbol;Acc:HGNC:8862]		0.14423076923076922	1	ENSP00000226524	1	1	4	1.67454e-05	0.000157101	0.00699383	1.56405e+06
ENSP00000226578	ENSG00000109323	MANBA	mannosidase, beta A, lysosomal [Source:HGNC Symbol;Acc:HGNC:6831]		0.14334470989761092	2	ENSP00000427322,ENSP00000226578	13	13	83	8.10222e-40	0.000157101	0.00699383	1.24333e+09
ENSP00000227266	ENSG00000109861	CTSC	cathepsin C [Source:HGNC Symbol;Acc:HGNC:2528]		0.12095032397408208	1	ENSP00000227266	3	3	20	3.67031e-15	0.000157101	0.00699383	4058716696
ENSP00000227665	ENSG00000110243	APOA5	apolipoprotein A-V [Source:HGNC Symbol;Acc:HGNC:17288]		0.273224043715847	3	ENSP00000227665,ENSP00000399701,ENSP00000445002	7	7	61	7.22247e-27	0.000157101	0.00699383	3.54425e+08
ENSP00000227667	ENSG00000110245	APOC3	apolipoprotein C-III [Source:HGNC Symbol;Acc:HGNC:610]		0.7676767676767676	4	ENSP00000486182,ENSP00000410614,ENSP00000227667,ENSP00000364494	9	9	1097	5.09671e-26	0.000157101	0.00699383	21653929984
ENSP00000227756	ENSG00000110328	GALNT18	polypeptide N-acetylgalactosaminyltransferase 18 [Source:HGNC Symbol;Acc:HGNC:30488]		0.07248764415156507	1	ENSP00000227756	5	5	15	1.50255e-10	0.000157101	0.00699383	4.43137e+07
ENSP00000228506	ENSG00000110917	MLEC	malectin [Source:HGNC Symbol;Acc:HGNC:28973]		0.23972602739726026	3	ENSP00000438950,ENSP00000228506,ENSP00000440746	5	5	42	2.46793e-26	0.000157101	0.00699383	54463340
ENSP00000228740	ENSG00000111144	LTA4H	leukotriene A4 hydrolase [Source:HGNC Symbol;Acc:HGNC:6710]		0.3158756137479542	4	ENSP00000228740,ENSP00000449340,ENSP00000449958,ENSP00000395051	17	17	129	3.40151e-59	0.000157101	0.00699383	4.03838e+09
ENSP00000228825	ENSG00000111229	ARPC3	actin related protein 2/3 complex, subunit 3, 21kDa [Source:HGNC Symbol;Acc:HGNC:706]		0.14606741573033707	1	ENSP00000228825	1	1	2	8.07631e-05	0.000157101	0.00699383	NA
ENSP00000228945	ENSG00000111348	ARHGDIB	Rho GDP dissociation inhibitor (GDI) beta [Source:HGNC Symbol;Acc:HGNC:679]		0.5074626865671642	7	ENSP00000445450,ENSP00000444860,ENSP00000445263,ENSP00000437454,ENSP00000228945,ENSP00000445185,ENSP00000440560	8	8	73	2.40008e-45	0.000157101	0.00699383	1.87978e+08
ENSP00000229319	ENSG00000111716	LDHB	lactate dehydrogenase B [Source:HGNC Symbol;Acc:HGNC:6541]		0.33532934131736525	24	ENSP00000441241,ENSP00000280706,ENSP00000368722,ENSP00000443414,ENSP00000437783,ENSP00000440161,ENSP00000445175,ENSP00000398015,ENSP00000446415,ENSP00000442680,ENSP00000379524,ENSP00000227157,ENSP00000379516,ENSP00000478764,ENSP00000379385,ENSP00000406172,ENSP00000439060,ENSP00000445331,ENSP00000379386,ENSP00000395337,ENSP00000439555,ENSP00000443997,ENSP00000229319,ENSP00000280704	9	11	190	5.47662e-30	0.000157101	0.00699383	1.79979e+09
ENSP00000229416	ENSG00000001084	GCLC	glutamate-cysteine ligase, catalytic subunit [Source:HGNC Symbol;Acc:HGNC:4311]		0.3218210361067504	6	ENSP00000421908,ENSP00000482756,ENSP00000421629,ENSP00000229416,ENSP00000423615,ENSP00000424211	15	15	92	2.7585e-61	0.000157101	0.00699383	701123216
ENSP00000229854	ENSG00000112118	MCM3	minichromosome maintenance complex component 3 [Source:HGNC Symbol;Acc:HGNC:6945]		0.011138613861386138	3	ENSP00000480987,ENSP00000229854,ENSP00000472940	1	1	1	0.0421877	0.0031314	0.0766336	NA
ENSP00000230036	ENSG00000112293	GPLD1	glycosylphosphatidylinositol specific phospholipase D1 [Source:HGNC Symbol;Acc:HGNC:4459]		0.3821428571428571	1	ENSP00000230036	28	28	1296	7.25093e-136	0.000157101	0.00699383	8.6472e+09
ENSP00000230418	ENSG00000112655	PTK7	protein tyrosine kinase 7 (inactive) [Source:HGNC Symbol;Acc:HGNC:9618]		0.0428921568627451	11	ENSP00000230419,ENSP00000417607,ENSP00000420322,ENSP00000418754,ENSP00000420165,ENSP00000419037,ENSP00000420765,ENSP00000230418,ENSP00000325462,ENSP00000326029,ENSP00000325992	2	2	6	1.0321e-09	0.000157101	0.00699383	3.75464e+06
ENSP00000230565	ENSG00000112796	ENPP5	ectonucleotide pyrophosphatase/phosphodiesterase 5 (putative) [Source:HGNC Symbol;Acc:HGNC:13717]		0.05660377358490566	2	ENSP00000230565,ENSP00000360436	2	2	13	2.2228e-06	0.000460765	0.0172042	1.21384e+07
ENSP00000230588	ENSG00000112818	MEP1A	meprin A, alpha (PABA peptide hydrolase) [Source:HGNC Symbol;Acc:HGNC:7015]		0.10187667560321716	2	ENSP00000480465,ENSP00000230588	5	5	18	5.25171e-19	0.000157101	0.00699383	20094625
ENSP00000230685	ENSG00000019582	CD74	CD74 molecule, major histocompatibility complex, class II invariant chain [Source:HGNC Symbol;Acc:HGNC:1697]		0.10775862068965517	3	ENSP00000230685,ENSP00000430614,ENSP00000009530	2	2	2	4.72051e-05	0.000460765	0.0172042	260735
ENSP00000231061	ENSG00000113140	SPARC	secreted protein, acidic, cysteine-rich (osteonectin) [Source:HGNC Symbol;Acc:HGNC:11219]		0.29042904290429045	4	ENSP00000444998,ENSP00000231061,ENSP00000440127,ENSP00000428119	2	6	81	5.03441e-09	0.000157101	0.00699383	697889287
ENSP00000231461	ENSG00000113532	ST8SIA4	ST8 alpha-N-acetyl-neuraminide alpha-2,8-sialyltransferase 4 [Source:HGNC Symbol;Acc:HGNC:10871]		0.12534818941504178	2	ENSP00000231461,ENSP00000428914	3	3	17	4.18565e-14	0.000157101	0.00699383	9.01843e+07
ENSP00000231484	ENSG00000113555	PCDH12	protocadherin 12 [Source:HGNC Symbol;Acc:HGNC:8657]		0.19594594594594594	1	ENSP00000231484	12	12	161	1.01171e-69	0.000157101	0.00699383	9.34443e+09
ENSP00000231487	ENSG00000113558	SKP1	S-phase kinase-associated protein 1 [Source:HGNC Symbol;Acc:HGNC:10899]		0.26380368098159507	11	ENSP00000429996,ENSP00000231487,ENSP00000429472,ENSP00000429686,ENSP00000430774,ENSP00000431067,ENSP00000430885,ENSP00000429961,ENSP00000429415,ENSP00000331708,ENSP00000429995	4	4	11	2.45736e-13	0.000460765	0.0172042	891539
ENSP00000231572	ENSG00000113643	RARS	arginyl-tRNA synthetase [Source:HGNC Symbol;Acc:HGNC:9870]		0.048484848484848485	1	ENSP00000231572	3	3	9	1.59248e-05	0.00101792	0.0312306	38993878
ENSP00000231721	ENSG00000010319	SEMA3G	sema domain, immunoglobulin domain (Ig), short basic domain, secreted, (semaphorin) 3G [Source:HGNC Symbol;Acc:HGNC:30400]		0.15728900255754474	2	ENSP00000231721,ENSP00000419181	7	7	71	1.04775e-27	0.000157101	0.00699383	7.25356e+09
ENSP00000232003	ENSG00000113905	HRG	histidine-rich glycoprotein [Source:HGNC Symbol;Acc:HGNC:5181]		0.3961904761904762	1	ENSP00000232003	27	27	4038	2.27576e-106	0.000157101	0.00699383	19726911488
ENSP00000232217	ENSG00000114113	RBP2	retinol binding protein 2, cellular [Source:HGNC Symbol;Acc:HGNC:9920]		0.3805970149253731	3	ENSP00000232217,ENSP00000424333,ENSP00000421266	4	4	8	7.75433e-07	0.000157101	0.00699383	3253004603
ENSP00000232975	ENSG00000114854	TNNC1	troponin C type 1 (slow) [Source:HGNC Symbol;Acc:HGNC:11943]		0.16770186335403728	2	ENSP00000232975,ENSP00000420596	1	2	3	0.00218194	0.000460765	0.0172042	NA
ENSP00000233114	ENSG00000014641	MDH1	malate dehydrogenase 1, NAD (soluble) [Source:HGNC Symbol;Acc:HGNC:6970]		0.15868263473053892	8	ENSP00000438144,ENSP00000233114,ENSP00000410073,ENSP00000386743,ENSP00000394504,ENSP00000386719,ENSP00000409027,ENSP00000446395	6	6	81	7.38308e-21	0.000157101	0.00699383	6.07036e+09
ENSP00000233154	ENSG00000071051	NCK2	NCK adaptor protein 2 [Source:HGNC Symbol;Acc:HGNC:7665]		0.03684210526315789	2	ENSP00000233154,ENSP00000377018	1	1	1	0.00297563	0.000460765	0.0172042	1977309
ENSP00000233242	ENSG00000084674	APOB	apolipoprotein B [Source:HGNC Symbol;Acc:HGNC:603]		0.6719263642340565	5	ENSP00000382200,ENSP00000477990,ENSP00000433064,ENSP00000233242,ENSP00000330148	410	410	50801	0	0.000157101	0.00699383	27206537216
ENSP00000233557	ENSG00000115216	NRBP1	nuclear receptor binding protein 1 [Source:HGNC Symbol;Acc:HGNC:7993]		0.09906542056074766	3	ENSP00000369181,ENSP00000369192,ENSP00000233557	3	3	4	1.22428e-09	0.000157101	0.00699383	1.24671e+07
ENSP00000233612	ENSG00000115271	GCA	grancalcin, EF-hand calcium binding protein [Source:HGNC Symbol;Acc:HGNC:15990]		0.2727272727272727	4	ENSP00000233612,ENSP00000403805,ENSP00000408620,ENSP00000394842	3	3	11	9.00972e-16	0.000157101	0.00699383	7.75561e+08
ENSP00000233735	ENSG00000115386	REG1A	regenerating islet-derived 1 alpha [Source:HGNC Symbol;Acc:HGNC:9951]		0.24096385542168675	1	ENSP00000233735	4	4	74	1.54239e-16	0.000157101	0.00699383	260511128
ENSP00000233809	ENSG00000115457	IGFBP2	insulin-like growth factor binding protein 2, 36kDa [Source:HGNC Symbol;Acc:HGNC:5471]		0.3323076923076923	3	ENSP00000233809,ENSP00000401698,ENSP00000389646	10	10	239	1.56849e-47	0.000157101	0.00699383	8.38009e+08
ENSP00000233813	ENSG00000115461	IGFBP5	insulin-like growth factor binding protein 5 [Source:HGNC Symbol;Acc:HGNC:5474]		0.3492647058823529	2	ENSP00000233813,ENSP00000413474	9	9	182	1.11875e-52	0.000157101	0.00699383	9.05951e+08
ENSP00000234038	ENSG00000115685	PPP1R7	protein phosphatase 1, regulatory subunit 7 [Source:HGNC Symbol;Acc:HGNC:9295]		0.325	12	ENSP00000272983,ENSP00000385466,ENSP00000392373,ENSP00000396376,ENSP00000385012,ENSP00000412092,ENSP00000234038,ENSP00000397985,ENSP00000385657,ENSP00000409719,ENSP00000385022,ENSP00000385498	2	9	47	0.0114238	0.00756506	0.159009	2.26486e+06
ENSP00000234071	ENSG00000115718	PROC	protein C (inactivator of coagulation factors Va and VIIIa) [Source:HGNC Symbol;Acc:HGNC:9451]		0.3665943600867679	5	ENSP00000386679,ENSP00000411241,ENSP00000384225,ENSP00000412697,ENSP00000234071	14	14	535	3.22201e-62	0.000157101	0.00699383	5.50953e+09
ENSP00000234313	ENSG00000115956	PLEK	pleckstrin [Source:HGNC Symbol;Acc:HGNC:9070]		0.25142857142857145	1	ENSP00000234313	5	5	52	1.251e-26	0.000157101	0.00699383	1.02089e+08
ENSP00000234590	ENSG00000074800	ENO1	enolase 1, (alpha) [Source:HGNC Symbol;Acc:HGNC:3350]		0.5506912442396313	19	ENSP00000431087,ENSP00000324105,ENSP00000438873,ENSP00000441490,ENSP00000438062,ENSP00000437402,ENSP00000234590,ENSP00000465697,ENSP00000468392,ENSP00000430636,ENSP00000229277,ENSP00000466406,ENSP00000430055,ENSP00000428502,ENSP00000476096,ENSP00000464874,ENSP00000445788,ENSP00000428811,ENSP00000467444	20	23	197	6.70388e-61	0.000157101	0.00699383	6.60277e+09
ENSP00000234677	ENSG00000031698	SARS	seryl-tRNA synthetase [Source:HGNC Symbol;Acc:HGNC:10537]		0.06031128404669261	2	ENSP00000358939,ENSP00000234677	3	3	17	3.95098e-09	0.000157101	0.00699383	13466136
ENSP00000234701	ENSG00000016490	CLCA1	chloride channel accessory 1 [Source:HGNC Symbol;Acc:HGNC:2015]		0.018599562363238512	2	ENSP00000378200,ENSP00000234701	1	1	1	0.000814146	0.000460765	0.0172042	627601
ENSP00000234816	ENSG00000116194	ANGPTL1	angiopoietin-like 1 [Source:HGNC Symbol;Acc:HGNC:489]		0.05702647657841141	3	ENSP00000234816,ENSP00000392023,ENSP00000356601	3	3	18	4.22494e-06	0.000460765	0.0172042	8503909
ENSP00000236147	ENSG00000188404	SELL	selectin L [Source:HGNC Symbol;Acc:HGNC:10720]		0.12727272727272726	1	ENSP00000236147	7	7	375	9.47292e-25	0.000157101	0.00699383	1.13321e+09
ENSP00000236671	ENSG00000117984	CTSD	cathepsin D [Source:HGNC Symbol;Acc:HGNC:2529]		0.1966019417475728	6	ENSP00000356164,ENSP00000415036,ENSP00000236671,ENSP00000402586,ENSP00000404902,ENSP00000415840	5	7	91	4.22692e-27	0.000157101	0.00699383	1.29923e+09
ENSP00000236826	ENSG00000118113	MMP8	matrix metallopeptidase 8 [Source:HGNC Symbol;Acc:HGNC:7175]		0.10706638115631692	2	ENSP00000401004,ENSP00000236826	4	4	13	2.16932e-09	0.000460765	0.0172042	8.85681e+07
ENSP00000236850	ENSG00000118137	APOA1	apolipoprotein A-I [Source:HGNC Symbol;Acc:HGNC:600]		0.6816479400749064	5	ENSP00000352471,ENSP00000236850,ENSP00000364469,ENSP00000364478,ENSP00000364472	38	38	2700	7.67856e-126	0.000157101	0.00699383	2.28214e+10
ENSP00000236937	ENSG00000072694	FCGR2B	Fc fragment of IgG, low affinity IIb, receptor (CD32) [Source:HGNC Symbol;Acc:HGNC:3618]		0.06529209621993128	6	ENSP00000356937,ENSP00000351497,ENSP00000404329,ENSP00000236937,ENSP00000356938,ENSP00000386038	1	1	3	1.33154e-05	0.000157101	0.00699383	2856735
ENSP00000236957	ENSG00000114942	EEF1B2	eukaryotic translation elongation factor 1 beta 2 [Source:HGNC Symbol;Acc:HGNC:3208]		0.14666666666666667	7	ENSP00000236957,ENSP00000376056,ENSP00000397793,ENSP00000407730,ENSP00000393501,ENSP00000376055,ENSP00000399917	2	2	7	7.11901e-12	0.000157101	0.00699383	90537126
ENSP00000237858	ENSG00000173221	GLRX	glutaredoxin (thioltransferase) [Source:HGNC Symbol;Acc:HGNC:4330]		0.4716981132075472	5	ENSP00000424636,ENSP00000422708,ENSP00000427353,ENSP00000237858,ENSP00000369314	2	2	5	2.81961e-17	0.000157101	0.00699383	2.11971e+07
ENSP00000238081	ENSG00000134308	YWHAQ	tyrosine 3-monooxygenase/tryptophan 5-monooxygenase activation protein, theta [Source:HGNC Symbol;Acc:HGNC:12854]		0.3469387755102041	28	ENSP00000379286,ENSP00000430072,ENSP00000461762,ENSP00000379287,ENSP00000428860,ENSP00000487432,ENSP00000395114,ENSP00000340989,ENSP00000306330,ENSP00000309503,ENSP00000466324,ENSP00000429623,ENSP00000430058,ENSP00000398599,ENSP00000238081,ENSP00000379281,ENSP00000379288,ENSP00000379278,ENSP00000300161,ENSP00000398990,ENSP00000371267,ENSP00000361930,ENSP00000481059,ENSP00000487356,ENSP00000248975…	6	7	39	7.6104e-29	0.000157101	0.00699383	5.8825e+07
ENSP00000238497	ENSG00000119541	VPS4B	vacuolar protein sorting 4 homolog B (S. cerevisiae) [Source:HGNC Symbol;Acc:HGNC:10895]		0.04279279279279279	1	ENSP00000238497	1	1	1	8.36718e-06	0.000157101	0.00699383	NA
ENSP00000238508	ENSG00000242550	SERPINB10	serpin peptidase inhibitor, clade B (ovalbumin), member 10 [Source:HGNC Symbol;Acc:HGNC:8942]		0.12846347607052896	2	ENSP00000479385,ENSP00000238508	4	4	5	3.2532e-11	0.000157101	0.00699383	1.88781e+06
ENSP00000238618	ENSG00000119640	ACYP1	acylphosphatase 1, erythrocyte (common) type [Source:HGNC Symbol;Acc:HGNC:179]		0.10101010101010101	3	ENSP00000238618,ENSP00000451581,ENSP00000450873	1	1	16	0.00299415	0.000460765	0.0172042	272760617
ENSP00000238633	ENSG00000119655	NPC2	Niemann-Pick disease, type C2 [Source:HGNC Symbol;Acc:HGNC:14537]		0.14189189189189189	8	ENSP00000412103,ENSP00000442488,ENSP00000450502,ENSP00000450887,ENSP00000238633,ENSP00000451180,ENSP00000451206,ENSP00000451112	2	2	17	2.1102e-05	0.000460765	0.0172042	2.10224e+09
ENSP00000239367	ENSG00000120256	LRP11	low density lipoprotein receptor-related protein 11 [Source:HGNC Symbol;Acc:HGNC:16936]		0.138	2	ENSP00000356338,ENSP00000239367	4	4	57	5.85369e-20	0.000157101	0.00699383	335264288
ENSP00000239462	ENSG00000120332	TNN	tenascin N [Source:HGNC Symbol;Acc:HGNC:22942]		0.27251732101616627	3	ENSP00000239462,ENSP00000480895,ENSP00000481259	29	29	196	3.13164e-108	0.000157101	0.00699383	2.64965e+09
ENSP00000240618	ENSG00000213809	KLRK1	killer cell lectin-like receptor subfamily K, member 1 [Source:HGNC Symbol;Acc:HGNC:18788]		0.05092592592592592	3	ENSP00000446003,ENSP00000480609,ENSP00000240618	1	1	3	0.0082273	0.00101792	0.0312306	1322234
ENSP00000241052	ENSG00000121691	CAT	catalase [Source:HGNC Symbol;Acc:HGNC:1516]		0.40417457305502846	1	ENSP00000241052	15	15	361	4.84707e-98	0.000157101	0.00699383	3.87727e+09
ENSP00000241069	ENSG00000087085	ACHE	acetylcholinesterase (Yt blood group) [Source:HGNC Symbol;Acc:HGNC:108]		0.13680781758957655	10	ENSP00000390004,ENSP00000404865,ENSP00000414858,ENSP00000394976,ENSP00000303211,ENSP00000399725,ENSP00000241069,ENSP00000410380,ENSP00000403474,ENSP00000397143	5	5	30	8.44201e-24	0.000157101	0.00699383	2.87106e+08
ENSP00000241261	ENSG00000121858	TNFSF10	tumor necrosis factor (ligand) superfamily, member 10 [Source:HGNC Symbol;Acc:HGNC:11925]		0.11743772241992882	1	ENSP00000241261	2	2	4	0.000173725	0.000460765	0.0172042	476818
ENSP00000241274	ENSG00000121871	SLITRK3	SLIT and NTRK-like family, member 3 [Source:HGNC Symbol;Acc:HGNC:23501]		0.0368474923234391	2	ENSP00000420091,ENSP00000241274	2	2	8	2.66473e-11	0.000157101	0.00699383	5.59663e+06
ENSP00000242059	ENSG00000136193	SCRN1	secernin 1 [Source:HGNC Symbol;Acc:HGNC:22192]		0.12560386473429952	9	ENSP00000406289,ENSP00000414245,ENSP00000409068,ENSP00000387052,ENSP00000486034,ENSP00000413184,ENSP00000386872,ENSP00000388942,ENSP00000242059	4	4	14	1.2604e-07	0.000157101	0.00699383	3.53571e+07
ENSP00000242208	ENSG00000122641	INHBA	inhibin, beta A [Source:HGNC Symbol;Acc:HGNC:6066]		0.07981220657276995	2	ENSP00000397197,ENSP00000242208	3	3	7	7.61868e-08	0.000157101	0.00699383	9.33354e+06
ENSP00000242209	ENSG00000122642	FKBP9	FK506 binding protein 9, 63 kDa [Source:HGNC Symbol;Acc:HGNC:3725]		0.1649122807017544	4	ENSP00000439250,ENSP00000242209,ENSP00000441317,ENSP00000391034	7	7	15	2.55872e-18	0.000157101	0.00699383	2.86946e+07
ENSP00000242338	ENSG00000122756	CNTFR	ciliary neurotrophic factor receptor [Source:HGNC Symbol;Acc:HGNC:2170]		0.17473118279569894	4	ENSP00000388082,ENSP00000368265,ENSP00000242338,ENSP00000480451	3	3	23	1.78194e-23	0.000157101	0.00699383	2563119440
ENSP00000242465	ENSG00000122862	SRGN	serglycin [Source:HGNC Symbol;Acc:HGNC:9361]		0.08860759493670886	1	ENSP00000242465	1	1	9	2.2825e-05	0.000157101	0.00699383	9524768
ENSP00000243077	ENSG00000123384	LRP1	low density lipoprotein receptor-related protein 1 [Source:HGNC Symbol;Acc:HGNC:6692]		0.22931338028169015	6	ENSP00000451449,ENSP00000451012,ENSP00000341264,ENSP00000451622,ENSP00000451737,ENSP00000243077	71	72	697	0	0.000157101	0.00699383	2.94936e+09
ENSP00000243346	ENSG00000123609	NMI	N-myc (and STAT) interactor [Source:HGNC Symbol;Acc:HGNC:7854]		0.09771986970684039	1	ENSP00000243346	3	3	7	0.00166556	0.00101792	0.0312306	726063
ENSP00000243347	ENSG00000123610	TNFAIP6	tumor necrosis factor, alpha-induced protein 6 [Source:HGNC Symbol;Acc:HGNC:11898]		0.10830324909747292	1	ENSP00000243347	2	2	17	1.43992e-06	0.000460765	0.0172042	2.61648e+06
ENSP00000244137	ENSG00000124299	PEPD	peptidase D [Source:HGNC Symbol;Acc:HGNC:8840]		0.3225152129817444	6	ENSP00000380226,ENSP00000468516,ENSP00000391890,ENSP00000244137,ENSP00000476667,ENSP00000476514	14	14	391	1.39682e-77	0.000157101	0.00699383	8325805056
ENSP00000244333	ENSG00000124466	LYPD3	LY6/PLAUR domain containing 3 [Source:HGNC Symbol;Acc:HGNC:24880]		0.1069364161849711	1	ENSP00000244333	2	2	11	4.89445e-07	0.000460765	0.0172042	2.71526e+07
ENSP00000244930	ENSG00000124939	SCGB2A1	secretoglobin, family 2A, member 1 [Source:HGNC Symbol;Acc:HGNC:7051]		0.3157894736842105	1	ENSP00000244930	2	2	4	3.95607e-06	0.000460765	0.0172042	3.49212e+06
ENSP00000245206	ENSG00000125166	GOT2	glutamic-oxaloacetic transaminase 2, mitochondrial [Source:HGNC Symbol;Acc:HGNC:4433]		0.18372093023255814	2	ENSP00000245206,ENSP00000394100	6	6	18	2.66749e-14	0.000157101	0.00699383	2.79883e+07
ENSP00000245323	ENSG00000125266	EFNB2	ephrin-B2 [Source:HGNC Symbol;Acc:HGNC:3227]		0.2012012012012012	1	ENSP00000245323	4	4	10	1.21114e-11	0.000157101	0.00699383	23890774
ENSP00000245451	ENSG00000125378	BMP4	bone morphogenetic protein 4 [Source:HGNC Symbol;Acc:HGNC:1071]		0.061274509803921566	4	ENSP00000453485,ENSP00000394165,ENSP00000245451,ENSP00000454134	2	2	2	0.00434699	0.00101792	0.0312306	5.63642e+06
ENSP00000245503	ENSG00000125414	MYH2	myosin, heavy chain 2, skeletal muscle, adult [Source:HGNC Symbol;Acc:HGNC:7572]		0.09119010819165378	13	ENSP00000384330,ENSP00000380367,ENSP00000245503,ENSP00000255381,ENSP00000348634,ENSP00000226207,ENSP00000463668,ENSP00000399348,ENSP00000386041,ENSP00000433944,ENSP00000347507,ENSP00000464317,ENSP00000482463	4	16	56	1.90079e-09	0.000460765	0.0172042	3643662
ENSP00000245907	ENSG00000125730	C3	complement component 3 [Source:HGNC Symbol;Acc:HGNC:1318]		0.449789536981359	4	ENSP00000469744,ENSP00000471384,ENSP00000245907,ENSP00000469482	77	77	1820	0	0.000157101	0.00699383	19905620992
ENSP00000245925	ENSG00000125746	EML2	echinoderm microtubule associated protein like 2 [Source:HGNC Symbol;Acc:HGNC:18035]		0.05546995377503852	8	ENSP00000464764,ENSP00000468329,ENSP00000245925,ENSP00000465607,ENSP00000382503,ENSP00000442365,ENSP00000468312,ENSP00000464789	3	3	7	1.12467e-08	0.000460765	0.0172042	95341684
ENSP00000245932	ENSG00000125753	VASP	vasodilator-stimulated phosphoprotein [Source:HGNC Symbol;Acc:HGNC:12652]		0.12368421052631579	2	ENSP00000245932,ENSP00000466319	3	3	9	2.13905e-07	0.000460765	0.0172042	1.72296e+08
ENSP00000246006	ENSG00000125810	CD93	CD93 molecule [Source:HGNC Symbol;Acc:HGNC:15855]		0.08895705521472393	1	ENSP00000246006	4	4	173	1.20447e-23	0.000157101	0.00699383	2.01433e+09
ENSP00000246151	ENSG00000057757	PITHD1	PITH (C-terminal proteasome-interacting domain of thioredoxin-like) domain containing 1 [Source:HGNC Symbol;Acc:HGNC:25022]		0.33649289099526064	3	ENSP00000246151,ENSP00000363648,ENSP00000405957	8	8	64	7.46515e-52	0.000157101	0.00699383	1890089184
ENSP00000246337	ENSG00000126088	UROD	uroporphyrinogen decarboxylase [Source:HGNC Symbol;Acc:HGNC:12591]		0.25885558583106266	3	ENSP00000246337,ENSP00000400253,ENSP00000404489	5	5	14	4.51766e-25	0.000157101	0.00699383	6.70983e+06
ENSP00000246515	ENSG00000126233	SLURP1	secreted LY6/PLAUR domain containing 1 [Source:HGNC Symbol;Acc:HGNC:18746]		0.2815533980582524	1	ENSP00000246515	1	1	3	4.26972e-08	0.000157101	0.00699383	4.70632e+06
ENSP00000246533	ENSG00000126247	CAPNS1	calpain, small subunit 1 [Source:HGNC Symbol;Acc:HGNC:1481]		0.3246268656716418	15	ENSP00000486032,ENSP00000400882,ENSP00000486832,ENSP00000464903,ENSP00000475159,ENSP00000468041,ENSP00000466386,ENSP00000487115,ENSP00000465575,ENSP00000466113,ENSP00000466601,ENSP00000475804,ENSP00000246533,ENSP00000474036,ENSP00000464849	9	9	44	2.55692e-33	0.000157101	0.00699383	6.60734e+09
ENSP00000246639	ENSG00000197079	KRT35	keratin 35, type I [Source:HGNC Symbol;Acc:HGNC:6453]		0.1011764705882353	34	ENSP00000308452,ENSP00000264651,ENSP00000167586,ENSP00000246635,ENSP00000225550,ENSP00000485008,ENSP00000251645,ENSP00000377555,ENSP00000336604,ENSP00000373489,ENSP00000447278,ENSP00000251646,ENSP00000246639,ENSP00000246646,ENSP00000468221,ENSP00000467418,ENSP00000305263,ENSP00000301653,ENSP00000329165,ENSP00000441751,ENSP00000373487,ENSP00000459509,ENSP00000225899,ENSP00000466465,ENSP00000377558…	2	4	84	0.0388386	0.0031314	0.0766336	25274625
ENSP00000246662	ENSG00000171403	KRT9	keratin 9, type I [Source:HGNC Symbol;Acc:HGNC:6447]		0.42857142857142855	2	ENSP00000246662,ENSP00000467932	39	39	610	3.30842e-192	0.000157101	0.00699383	9.88844e+09
ENSP00000246949	ENSG00000213918	DNASE1	deoxyribonuclease I [Source:HGNC Symbol;Acc:HGNC:2956]		0.11702127659574468	3	ENSP00000385905,ENSP00000458467,ENSP00000246949	2	2	28	5.47875e-13	0.000157101	0.00699383	2.01956e+08
ENSP00000247153	ENSG00000126759	CFP	complement factor properdin [Source:HGNC Symbol;Acc:HGNC:8864]		0.13432835820895522	3	ENSP00000247153,ENSP00000380189,ENSP00000366204	5	5	90	2.84472e-20	0.000157101	0.00699383	1.09789e+09
ENSP00000247461	ENSG00000127022	CANX	calnexin [Source:HGNC Symbol;Acc:HGNC:1473]		0.2483108108108108	13	ENSP00000421813,ENSP00000421107,ENSP00000426052,ENSP00000427115,ENSP00000426555,ENSP00000247461,ENSP00000424341,ENSP00000391646,ENSP00000424745,ENSP00000424063,ENSP00000424740,ENSP00000425246,ENSP00000424140	14	14	78	1.8086e-56	0.000157101	0.00699383	3.16749e+08
ENSP00000248484	ENSG00000127863	TNFRSF19	tumor necrosis factor receptor superfamily, member 19 [Source:HGNC Symbol;Acc:HGNC:11915]		0.03836930455635491	3	ENSP00000371698,ENSP00000371693,ENSP00000248484	1	1	1	2.23215e-07	0.000157101	0.00699383	1006787
ENSP00000248553	ENSG00000106211	HSPB1	heat shock 27kDa protein 1 [Source:HGNC Symbol;Acc:HGNC:5246]		0.2048780487804878	3	ENSP00000405285,ENSP00000248553,ENSP00000414357	3	3	19	1.16775e-10	0.000157101	0.00699383	9.51715e+07
ENSP00000248598	ENSG00000127951	FGL2	fibrinogen-like 2 [Source:HGNC Symbol;Acc:HGNC:3696]		0.2870159453302961	1	ENSP00000248598	10	10	59	3.33737e-30	0.000157101	0.00699383	1.42442e+08
ENSP00000248923	ENSG00000100031	GGT1	gamma-glutamyltransferase 1 [Source:HGNC Symbol;Acc:HGNC:4250]		0.08611599297012303	18	ENSP00000478615,ENSP00000383232,ENSP00000483019,ENSP00000385601,ENSP00000384820,ENSP00000383231,ENSP00000402035,ENSP00000385001,ENSP00000385016,ENSP00000385445,ENSP00000477856,ENSP00000387499,ENSP00000393537,ENSP00000385721,ENSP00000384381,ENSP00000248923,ENSP00000415676,ENSP00000419751	4	4	21	1.30655e-13	0.000157101	0.00699383	1.98497e+07
ENSP00000248975	ENSG00000128245	YWHAH	tyrosine 3-monooxygenase/tryptophan 5-monooxygenase activation protein, eta [Source:HGNC Symbol;Acc:HGNC:12853]		0.16666666666666666	28	ENSP00000379286,ENSP00000430072,ENSP00000461762,ENSP00000379287,ENSP00000428860,ENSP00000487432,ENSP00000395114,ENSP00000340989,ENSP00000306330,ENSP00000309503,ENSP00000429623,ENSP00000406747,ENSP00000430058,ENSP00000398599,ENSP00000238081,ENSP00000264335,ENSP00000379281,ENSP00000379288,ENSP00000379283,ENSP00000379278,ENSP00000300161,ENSP00000371267,ENSP00000361930,ENSP00000481059,ENSP00000487356…	3	4	26	4.71922e-07	0.000157101	0.00699383	18918672
ENSP00000249330	ENSG00000128564	VGF	VGF nerve growth factor inducible [Source:HGNC Symbol;Acc:HGNC:12684]		0.2731707317073171	3	ENSP00000249330,ENSP00000480817,ENSP00000400884	6	6	25	7.39034e-38	0.000157101	0.00699383	666918080
ENSP00000249363	ENSG00000128594	LRRC4	leucine rich repeat containing 4 [Source:HGNC Symbol;Acc:HGNC:15586]		0.13476263399693722	9	ENSP00000472528,ENSP00000471502,ENSP00000373853,ENSP00000436976,ENSP00000278198,ENSP00000249363,ENSP00000480903,ENSP00000437132,ENSP00000434761	5	6	32	4.38333e-21	0.000157101	0.00699383	77480656
ENSP00000249364	ENSG00000128595	CALU	calumenin [Source:HGNC Symbol;Acc:HGNC:1458]		0.326984126984127	6	ENSP00000249364,ENSP00000417973,ENSP00000442110,ENSP00000408838,ENSP00000438248,ENSP00000420381	4	11	51	2.6904e-11	0.000157101	0.00699383	39927623
ENSP00000249842	ENSG00000129009	ISLR	immunoglobulin superfamily containing leucine-rich repeat [Source:HGNC Symbol;Acc:HGNC:6133]		0.24299065420560748	4	ENSP00000249842,ENSP00000378550,ENSP00000453884,ENSP00000453105	6	6	98	2.03256e-29	0.000157101	0.00699383	6.41598e+08
ENSP00000250111	ENSG00000129244	ATP1B2	ATPase, Na+/K+ transporting, beta 2 polypeptide [Source:HGNC Symbol;Acc:HGNC:805]		0.1413793103448276	3	ENSP00000250111,ENSP00000459145,ENSP00000460499	4	4	15	4.22108e-15	0.000157101	0.00699383	1.50511e+07
ENSP00000250241	ENSG00000129351	ILF3	interleukin enhancer binding factor 3, 90kDa [Source:HGNC Symbol;Acc:HGNC:6038]		0.25217391304347825	20	ENSP00000321347,ENSP00000468092,ENSP00000465831,ENSP00000465219,ENSP00000404121,ENSP00000468323,ENSP00000464974,ENSP00000467704,ENSP00000468181,ENSP00000466991,ENSP00000468134,ENSP00000467950,ENSP00000250241,ENSP00000415968,ENSP00000384660,ENSP00000465515,ENSP00000465654,ENSP00000468156,ENSP00000354271,ENSP00000466396	11	11	21	7.19524e-28	0.000157101	0.00699383	5.72196e+07
ENSP00000250340	ENSG00000105472	CLEC11A	C-type lectin domain family 11, member A [Source:HGNC Symbol;Acc:HGNC:10576]		0.14551083591331268	3	ENSP00000471075,ENSP00000250340,ENSP00000480599	4	4	16	6.25041e-12	0.000460765	0.0172042	1.26588e+07
ENSP00000250360	ENSG00000129450	SIGLEC9	sialic acid binding Ig-like lectin 9 [Source:HGNC Symbol;Acc:HGNC:10878]		0.08639308855291576	8	ENSP00000323328,ENSP00000306757,ENSP00000250360,ENSP00000469626,ENSP00000472483,ENSP00000413861,ENSP00000437609,ENSP00000472529	3	3	14	1.80198e-10	0.000157101	0.00699383	22317012
ENSP00000250572	ENSG00000174837	ADGRE1	adhesion G protein-coupled receptor E1 [Source:HGNC Symbol;Acc:HGNC:3336]		0.09500609013398295	6	ENSP00000311545,ENSP00000472553,ENSP00000405974,ENSP00000250572,ENSP00000370814,ENSP00000370811	3	3	13	0.000594817	0.00126687	0.0366317	2.70881e+06
ENSP00000251047	ENSG00000074695	LMAN1	lectin, mannose-binding, 1 [Source:HGNC Symbol;Acc:HGNC:6631]		0.19607843137254902	1	ENSP00000251047	9	9	99	3.81327e-34	0.000157101	0.00699383	2.79288e+08
ENSP00000251081	ENSG00000134755	DSC2	desmocollin 2 [Source:HGNC Symbol;Acc:HGNC:3036]		0.32585596221959856	2	ENSP00000280904,ENSP00000251081	17	17	108	1.10978e-99	0.000157101	0.00699383	1.84522e+08
ENSP00000251268	ENSG00000105429	MEGF8	multiple EGF-like-domains 8 [Source:HGNC Symbol;Acc:HGNC:3233]		0.12688927943760983	3	ENSP00000251268,ENSP00000470620,ENSP00000334219	20	20	223	8.16054e-96	0.000157101	0.00699383	1.94016e+09
ENSP00000251296	ENSG00000117154	IGSF21	immunoglobin superfamily, member 21 [Source:HGNC Symbol;Acc:HGNC:28246]		0.1006423982869379	1	ENSP00000251296	4	4	11	3.1406e-12	0.000157101	0.00699383	3.984e+08
ENSP00000251535	ENSG00000108839	ALOX12	arachidonate 12-lipoxygenase [Source:HGNC Symbol;Acc:HGNC:429]		0.04524886877828054	2	ENSP00000251535,ENSP00000467033	2	2	3	0.0152416	0.00101792	0.0312306	8587939
ENSP00000251595	ENSG00000188536	HBA2	hemoglobin, alpha 2 [Source:HGNC Symbol;Acc:HGNC:4824]		0.30985915492957744	4	ENSP00000380908,ENSP00000251595,ENSP00000380899,ENSP00000322421	3	3	34	2.05525e-13	0.000157101	0.00699383	5.08893e+08
ENSP00000252453	ENSG00000130173	C19orf80	chromosome 19 open reading frame 80 [Source:HGNC Symbol;Acc:HGNC:24933]		0.08585858585858586	7	ENSP00000464941,ENSP00000479969,ENSP00000445628,ENSP00000445834,ENSP00000444428,ENSP00000329967,ENSP00000252453	1	2	9	0.0055689	0.000755242	0.0250629	544768
ENSP00000252485	ENSG00000130202	PVRL2	poliovirus receptor-related 2 (herpesvirus entry mediator B) [Source:HGNC Symbol;Acc:HGNC:9707]		0.1127348643006263	3	ENSP00000252485,ENSP00000465587,ENSP00000252483	3	3	16	2.59951e-09	0.000157101	0.00699383	1.70184e+08
ENSP00000252486	ENSG00000130203	APOE	apolipoprotein E [Source:HGNC Symbol;Acc:HGNC:613]		0.7602523659305994	4	ENSP00000413135,ENSP00000413653,ENSP00000252486,ENSP00000410423	40	40	2117	3.99363e-122	0.000157101	0.00699383	20288714752
ENSP00000252512	ENSG00000130227	XPO7	exportin 7 [Source:HGNC Symbol;Acc:HGNC:14108]		0.06347746090156393	4	ENSP00000429290,ENSP00000410249,ENSP00000252512,ENSP00000429317	5	5	10	6.90287e-11	0.000157101	0.00699383	2.74058e+07
ENSP00000252519	ENSG00000130234	ACE2	angiotensin I converting enzyme 2 [Source:HGNC Symbol;Acc:HGNC:13557]		0.03975155279503106	2	ENSP00000389326,ENSP00000252519	1	1	1	3.90541e-06	0.000157101	0.00699383	5800684
ENSP00000252575	ENSG00000130287	NCAN	neurocan [Source:HGNC Symbol;Acc:HGNC:2465]		0.07494322482967448	2	ENSP00000252575,ENSP00000465599	7	7	24	7.20095e-30	0.000157101	0.00699383	6842954
ENSP00000252590	ENSG00000130300	PLVAP	plasmalemma vesicle associated protein [Source:HGNC Symbol;Acc:HGNC:13635]		0.08823529411764706	1	ENSP00000252590	3	3	13	5.25409e-08	0.000157101	0.00699383	8.992e+06
ENSP00000252725	ENSG00000130429	ARPC1B	actin related protein 2/3 complex, subunit 1B, 41kDa [Source:HGNC Symbol;Acc:HGNC:704]		0.13440860215053763	11	ENSP00000413067,ENSP00000388802,ENSP00000398620,ENSP00000403324,ENSP00000252725,ENSP00000413173,ENSP00000403211,ENSP00000398110,ENSP00000399955,ENSP00000410238,ENSP00000389631	3	3	5	1.20078e-06	0.000460765	0.0172042	4.98823e+07
ENSP00000252804	ENSG00000130508	PXDN	peroxidasin [Source:HGNC Symbol;Acc:HGNC:14966]		0.1852603110209601	5	ENSP00000402738,ENSP00000408701,ENSP00000398363,ENSP00000252804,ENSP00000414098	17	17	75	3.09064e-65	0.000157101	0.00699383	2.71459e+09
ENSP00000252809	ENSG00000130513	GDF15	growth differentiation factor 15 [Source:HGNC Symbol;Acc:HGNC:30142]		0.07467532467532467	2	ENSP00000470531,ENSP00000252809	2	2	7	5.86852e-05	0.000157101	0.00699383	986430
ENSP00000252999	ENSG00000130702	LAMA5	laminin, alpha 5 [Source:HGNC Symbol;Acc:HGNC:6485]		0.03924221921515562	4	ENSP00000252999,ENSP00000382432,ENSP00000324532,ENSP00000468316	9	10	29	1.22131e-46	0.000157101	0.00699383	3.56833e+08
ENSP00000253004	ENSG00000130707	ASS1	argininosuccinate synthase 1 [Source:HGNC Symbol;Acc:HGNC:758]		0.08737864077669903	5	ENSP00000397785,ENSP00000253004,ENSP00000394212,ENSP00000361471,ENSP00000361469	4	4	20	8.67619e-07	0.000157101	0.00699383	28270422
ENSP00000253332	ENSG00000131016	AKAP12	A kinase (PRKA) anchor protein 12 [Source:HGNC Symbol;Acc:HGNC:370]		0.4113355780022447	4	ENSP00000384537,ENSP00000346702,ENSP00000253332,ENSP00000352794	44	44	273	8.9741e-209	0.000157101	0.00699383	1.48328e+09
ENSP00000253354	ENSG00000125999	BPIFB1	BPI fold containing family B, member 1 [Source:HGNC Symbol;Acc:HGNC:16108]		0.10743801652892562	1	ENSP00000253354	3	3	10	1.79016e-14	0.000157101	0.00699383	1.53177e+07
ENSP00000253496	ENSG00000131187	F12	coagulation factor XII (Hageman factor) [Source:HGNC Symbol;Acc:HGNC:3530]		0.3121951219512195	1	ENSP00000253496	13	13	826	3.49974e-89	0.000157101	0.00699383	1.2386e+10
ENSP00000253811	ENSG00000131504	DIAPH1	diaphanous-related formin 1 [Source:HGNC Symbol;Acc:HGNC:2876]		0.0724755700325733	5	ENSP00000381565,ENSP00000428268,ENSP00000373706,ENSP00000253811,ENSP00000373709	7	7	24	4.91896e-27	0.000157101	0.00699383	228136142
ENSP00000254035	ENSG00000131730	CKMT2	creatine kinase, mitochondrial 2 (sarcomeric) [Source:HGNC Symbol;Acc:HGNC:1996]		0.06443914081145585	15	ENSP00000404203,ENSP00000406577,ENSP00000300283,ENSP00000451904,ENSP00000221476,ENSP00000410289,ENSP00000451426,ENSP00000413165,ENSP00000254035,ENSP00000486477,ENSP00000413255,ENSP00000451680,ENSP00000299198,ENSP00000416717,ENSP00000487331	1	2	4	9.52964e-06	0.000157101	0.00699383	4032722
ENSP00000254043	ENSG00000171346	KRT15	keratin 15, type I [Source:HGNC Symbol;Acc:HGNC:6421]		0.16666666666666666	41	ENSP00000308452,ENSP00000264651,ENSP00000466625,ENSP00000225899,ENSP00000246635,ENSP00000225550,ENSP00000377616,ENSP00000485008,ENSP00000251645,ENSP00000467418,ENSP00000269576,ENSP00000167588,ENSP00000441751,ENSP00000336604,ENSP00000460501,ENSP00000447278,ENSP00000251646,ENSP00000246639,ENSP00000246646,ENSP00000468221,ENSP00000409282,ENSP00000377555,ENSP00000305263,ENSP00000408759,ENSP00000377544…	1	8	138	0.0228467	0.00126687	0.0366317	NA
ENSP00000254122	ENSG00000131808	FSHB	follicle stimulating hormone, beta polypeptide [Source:HGNC Symbol;Acc:HGNC:3964]		0.06201550387596899	3	ENSP00000433424,ENSP00000416606,ENSP00000254122	1	1	6	0.0440064	0.0031314	0.0766336	705300
ENSP00000254322	ENSG00000132002	DNAJB1	DnaJ (Hsp40) homolog, subfamily B, member 1 [Source:HGNC Symbol;Acc:HGNC:5270]		0.15	9	ENSP00000470460,ENSP00000471073,ENSP00000359799,ENSP00000469221,ENSP00000471798,ENSP00000444212,ENSP00000470596,ENSP00000254322,ENSP00000470063	4	4	8	8.01465e-17	0.000157101	0.00699383	24657433
ENSP00000254351	ENSG00000115884	SDC1	syndecan 1 [Source:HGNC Symbol;Acc:HGNC:10658]		0.11612903225806452	4	ENSP00000254351,ENSP00000400773,ENSP00000384613,ENSP00000370542	2	2	14	4.25685e-12	0.000157101	0.00699383	1.02504e+08
ENSP00000254508	ENSG00000132182	NUP210	nucleoporin 210kDa [Source:HGNC Symbol;Acc:HGNC:30052]		0.012188659247482777	1	ENSP00000254508	2	2	4	0.000145027	0.000460765	0.0172042	2.76875e+06
ENSP00000254528	ENSG00000132205	EMILIN2	elastin microfibril interfacer 2 [Source:HGNC Symbol;Acc:HGNC:19881]		0.15669515669515668	1	ENSP00000254528	12	12	43	6.64922e-27	0.000157101	0.00699383	4.40384e+08
ENSP00000254663	ENSG00000132330	SCLY	selenocysteine lyase [Source:HGNC Symbol;Acc:HGNC:18161]		0.06181015452538632	5	ENSP00000254663,ENSP00000402078,ENSP00000387162,ENSP00000414053,ENSP00000404444	2	2	3	4.42632e-06	0.000157101	0.00699383	NA
ENSP00000254722	ENSG00000132386	SERPINF1	serpin peptidase inhibitor, clade F (alpha-2 antiplasmin, pigment epithelium derived factor), member 1 [Source:HGNC Symbol;Acc:HGNC:8824]		0.5239234449760766	9	ENSP00000254722,ENSP00000460905,ENSP00000459107,ENSP00000461660,ENSP00000461214,ENSP00000458484,ENSP00000461405,ENSP00000459869,ENSP00000460842	23	23	3959	4.14596e-106	0.000157101	0.00699383	21607868416
ENSP00000254850	ENSG00000161944	ASGR2	asialoglycoprotein receptor 2 [Source:HGNC Symbol;Acc:HGNC:743]		0.1672473867595819	3	ENSP00000347140,ENSP00000254850,ENSP00000405844	3	3	138	4.6628e-23	0.000157101	0.00699383	4.91994e+09
ENSP00000254958	ENSG00000101384	JAG1	jagged 1 [Source:HGNC Symbol;Acc:HGNC:6188]		0.08784893267651889	3	ENSP00000328169,ENSP00000328566,ENSP00000254958	7	8	53	4.18755e-21	0.000157101	0.00699383	440881048
ENSP00000255030	ENSG00000132693	CRP	C-reactive protein, pentraxin-related [Source:HGNC Symbol;Acc:HGNC:2367]		0.16071428571428573	5	ENSP00000402788,ENSP00000357091,ENSP00000255030,ENSP00000357092,ENSP00000357093	4	4	264	3.12799e-10	0.000460765	0.0172042	1.01467e+10
ENSP00000255040	ENSG00000132703	APCS	amyloid P component, serum [Source:HGNC Symbol;Acc:HGNC:584]		0.40358744394618834	1	ENSP00000255040	11	11	1613	3.25432e-31	0.000157101	0.00699383	15260155904
ENSP00000255409	ENSG00000133048	CHI3L1	chitinase 3-like 1 (cartilage glycoprotein-39) [Source:HGNC Symbol;Acc:HGNC:1932]		0.13838120104438642	2	ENSP00000255409,ENSP00000385350	4	4	36	2.11791e-17	0.000157101	0.00699383	303897376
ENSP00000255427	ENSG00000133063	CHIT1	chitinase 1 (chitotriosidase) [Source:HGNC Symbol;Acc:HGNC:1936]		0.18791946308724833	4	ENSP00000255427,ENSP00000423778,ENSP00000421617,ENSP00000356198	3	3	12	1.91229e-25	0.000157101	0.00699383	8590944
ENSP00000255858	ENSG00000133488	SEC14L4	SEC14-like 4 (S. cerevisiae) [Source:HGNC Symbol;Acc:HGNC:20627]		0.14039408866995073	6	ENSP00000314163,ENSP00000317617,ENSP00000255858,ENSP00000393380,ENSP00000371412,ENSP00000385695	5	5	17	2.00556e-12	0.000157101	0.00699383	1.68379e+07
ENSP00000256010	ENSG00000133636	NTS	neurotensin [Source:HGNC Symbol;Acc:HGNC:8038]		0.3411764705882353	1	ENSP00000256010	4	4	28	5.74925e-32	0.000157101	0.00699383	17148889
ENSP00000256104	ENSG00000170323	FABP4	fatty acid binding protein 4, adipocyte [Source:HGNC Symbol;Acc:HGNC:3559]		0.38636363636363635	4	ENSP00000256104,ENSP00000429917,ENSP00000428385,ENSP00000256103	6	6	63	2.01532e-17	0.000157101	0.00699383	8.55197e+08
ENSP00000256178	ENSG00000133800	LYVE1	lymphatic vessel endothelial hyaluronan receptor 1 [Source:HGNC Symbol;Acc:HGNC:14687]		0.15527950310559005	1	ENSP00000256178	4	4	132	1.37023e-14	0.000157101	0.00699383	2955816032
ENSP00000256383	ENSG00000134001	EIF2S1	eukaryotic translation initiation factor 2, subunit 1 alpha, 35kDa [Source:HGNC Symbol;Acc:HGNC:3265]		0.10158730158730159	4	ENSP00000452034,ENSP00000256383,ENSP00000451975,ENSP00000425299	3	3	13	4.54683e-05	0.000460765	0.0172042	3.41493e+06
ENSP00000256404	ENSG00000134020	PEBP4	phosphatidylethanolamine-binding protein 4 [Source:HGNC Symbol;Acc:HGNC:28319]		0.23348017621145375	1	ENSP00000256404	5	5	18	5.88316e-24	0.000157101	0.00699383	78524584
ENSP00000256412	ENSG00000134028	ADAMDEC1	ADAM-like, decysin 1 [Source:HGNC Symbol;Acc:HGNC:16299]		0.251063829787234	2	ENSP00000428993,ENSP00000256412	7	7	59	3.38884e-33	0.000157101	0.00699383	4.7771e+09
ENSP00000256460	ENSG00000134072	CAMK1	calcium/calmodulin-dependent protein kinase I [Source:HGNC Symbol;Acc:HGNC:1459]		0.0945945945945946	2	ENSP00000404587,ENSP00000256460	2	2	2	7.02542e-09	0.000157101	0.00699383	50466539
ENSP00000256637	ENSG00000134243	SORT1	sortilin 1 [Source:HGNC Symbol;Acc:HGNC:11186]		0.06618531889290012	2	ENSP00000256637,ENSP00000438597	4	4	6	1.702e-16	0.000157101	0.00699383	8.13671e+07
ENSP00000256652	ENSG00000134256	CD101	CD101 molecule [Source:HGNC Symbol;Acc:HGNC:5949]		0.08227228207639568	2	ENSP00000256652,ENSP00000358482	6	6	25	1.98374e-26	0.000157101	0.00699383	1.21543e+07
ENSP00000256785	ENSG00000134389	CFHR5	complement factor H-related 5 [Source:HGNC Symbol;Acc:HGNC:24668]		0.4780316344463972	3	ENSP00000256785,ENSP00000314299,ENSP00000356394	16	17	825	5.06534e-74	0.000157101	0.00699383	1.23284e+10
ENSP00000256876	ENSG00000134460	IL2RA	interleukin 2 receptor, alpha [Source:HGNC Symbol;Acc:HGNC:6008]		0.045627376425855515	2	ENSP00000369293,ENSP00000256876	1	1	5	0.000469034	0.000460765	0.0172042	2089112
ENSP00000256969	ENSG00000134548	SPX	spexin hormone [Source:HGNC Symbol;Acc:HGNC:28139]		0.19827586206896552	1	ENSP00000256969	2	2	5	4.83893e-05	0.000157101	0.00699383	1.15184e+07
ENSP00000257192	ENSG00000134760	DSG1	desmoglein 1 [Source:HGNC Symbol;Acc:HGNC:3048]		0.12202097235462345	2	ENSP00000257192,ENSP00000462666	9	9	65	1.57391e-45	0.000157101	0.00699383	223427112
ENSP00000257197	ENSG00000134765	DSC1	desmocollin 1 [Source:HGNC Symbol;Acc:HGNC:3035]		0.13095238095238096	2	ENSP00000257197,ENSP00000257198	8	8	137	4.60025e-29	0.000157101	0.00699383	5716135936
ENSP00000257264	ENSG00000134827	TCN1	transcobalamin I (vitamin B12 binding protein, R binder family) [Source:HGNC Symbol;Acc:HGNC:11652]		0.09006928406466513	1	ENSP00000257264	3	3	39	2.0094e-15	0.000157101	0.00699383	2.19408e+07
ENSP00000257290	ENSG00000134853	PDGFRA	platelet-derived growth factor receptor, alpha polypeptide [Source:HGNC Symbol;Acc:HGNC:8803]		0.10376492194674013	4	ENSP00000424218,ENSP00000423325,ENSP00000425648,ENSP00000257290	5	5	27	1.71693e-22	0.000157101	0.00699383	1621766250
ENSP00000257359	ENSG00000134917	ADAMTS8	ADAM metallopeptidase with thrombospondin type 1 motif, 8 [Source:HGNC Symbol;Acc:HGNC:224]		0.10798650168728909	1	ENSP00000257359	6	6	46	1.70738e-32	0.000157101	0.00699383	2013707980
ENSP00000257408	ENSG00000134962	KLB	klotho beta [Source:HGNC Symbol;Acc:HGNC:15527]		0.033524904214559385	1	ENSP00000257408	3	3	11	4.63266e-08	0.000460765	0.0172042	1.35043e+08
ENSP00000257497	ENSG00000135046	ANXA1	annexin A1 [Source:HGNC Symbol;Acc:HGNC:533]		0.28034682080924855	4	ENSP00000257497,ENSP00000366109,ENSP00000412489,ENSP00000414013	9	9	25	3.8883e-23	0.000157101	0.00699383	355617165
ENSP00000257974	ENSG00000161850	KRT82	keratin 82, type II [Source:HGNC Symbol;Acc:HGNC:6459]		0.017543859649122806	1	ENSP00000257974	1	1	2	0.055962	0.00338313	0.0815232	6749322
ENSP00000258091	ENSG00000135624	CCT7	chaperonin containing TCP1, subunit 7 (eta) [Source:HGNC Symbol;Acc:HGNC:1622]		0.2154696132596685	6	ENSP00000381456,ENSP00000437824,ENSP00000258091,ENSP00000487267,ENSP00000386978,ENSP00000442058	8	8	32	1.65153e-34	0.000157101	0.00699383	7.68766e+08
ENSP00000258123	ENSG00000135655	USP15	ubiquitin specific peptidase 15 [Source:HGNC Symbol;Acc:HGNC:12613]		0.148109243697479	8	ENSP00000448393,ENSP00000446843,ENSP00000258123,ENSP00000280377,ENSP00000447603,ENSP00000447367,ENSP00000309240,ENSP00000449563	9	9	31	1.02314e-29	0.000157101	0.00699383	1.91733e+07
ENSP00000258145	ENSG00000135677	GNS	glucosamine (N-acetyl)-6-sulfatase [Source:HGNC Symbol;Acc:HGNC:4422]		0.11775362318840579	6	ENSP00000413130,ENSP00000258145,ENSP00000445055,ENSP00000438497,ENSP00000444819,ENSP00000437782	5	5	22	3.75536e-16	0.000157101	0.00699383	8.48409e+07
ENSP00000258201	ENSG00000135723	FHOD1	formin homology 2 domain containing 1 [Source:HGNC Symbol;Acc:HGNC:17905]		0.02147766323024055	1	ENSP00000258201	2	2	2	0.00498698	0.00126687	0.0366317	2.43475e+07
ENSP00000258341	ENSG00000135862	LAMC1	laminin, gamma 1 (formerly LAMB2) [Source:HGNC Symbol;Acc:HGNC:6492]		0.27967681789931637	1	ENSP00000258341	33	33	321	2.75426e-124	0.000157101	0.00699383	1.90001e+09
ENSP00000258526	ENSG00000136040	PLXNC1	plexin C1 [Source:HGNC Symbol;Acc:HGNC:9106]		0.04528061224489796	2	ENSP00000447843,ENSP00000258526	3	3	8	8.03177e-08	0.000157101	0.00699383	33759806
ENSP00000258711	ENSG00000136213	CHST12	carbohydrate (chondroitin 4) sulfotransferase 12 [Source:HGNC Symbol;Acc:HGNC:17423]		0.2246376811594203	3	ENSP00000258711,ENSP00000411207,ENSP00000481912	6	6	21	8.89122e-20	0.000157101	0.00699383	2.1851e+07
ENSP00000258969	ENSG00000136457	CHAD	chondroadherin [Source:HGNC Symbol;Acc:HGNC:1909]		0.10863509749303621	2	ENSP00000423812,ENSP00000258969	3	3	32	6.19739e-19	0.000157101	0.00699383	2.46909e+08
ENSP00000259056	ENSG00000136542	GALNT5	polypeptide N-acetylgalactosaminyltransferase 5 [Source:HGNC Symbol;Acc:HGNC:4127]		0.09680851063829787	1	ENSP00000259056	9	9	36	1.28597e-27	0.000157101	0.00699383	3.34051e+08
ENSP00000259237	ENSG00000136717	BIN1	bridging integrator 1 [Source:HGNC Symbol;Acc:HGNC:1052]		0.18092909535452323	18	ENSP00000376760,ENSP00000350654,ENSP00000259237,ENSP00000376761,ENSP00000348602,ENSP00000386797,ENSP00000445874,ENSP00000317441,ENSP00000315411,ENSP00000315284,ENSP00000259238,ENSP00000410217,ENSP00000474972,ENSP00000365281,ENSP00000483983,ENSP00000315388,ENSP00000267012,ENSP00000316779	4	5	24	5.36378e-19	0.000157101	0.00699383	4.58042e+07
ENSP00000259241	ENSG00000136720	HS6ST1	heparan sulfate 6-O-sulfotransferase 1 [Source:HGNC Symbol;Acc:HGNC:5201]		0.0681265206812652	1	ENSP00000259241	2	2	6	4.43724e-07	0.000157101	0.00699383	283046876
ENSP00000259253	ENSG00000136731	UGGT1	UDP-glucose glycoprotein glucosyltransferase 1 [Source:HGNC Symbol;Acc:HGNC:15663]		0.1729903536977492	2	ENSP00000259253,ENSP00000365938	18	18	115	7.59586e-61	0.000157101	0.00699383	1005389120
ENSP00000259365	ENSG00000136842	TMOD1	tropomodulin 1 [Source:HGNC Symbol;Acc:HGNC:11871]		0.24233983286908078	3	ENSP00000378637,ENSP00000364318,ENSP00000259365	6	6	18	1.35423e-15	0.000157101	0.00699383	1.35899e+07
ENSP00000259396	ENSG00000229314	ORM1	orosomucoid 1 [Source:HGNC Symbol;Acc:HGNC:8498]		0.21393034825870647	2	ENSP00000259396,ENSP00000394936	4	5	228	4.93772e-17	0.000157101	0.00699383	3.37072e+09
ENSP00000259457	ENSG00000136930	PSMB7	proteasome (prosome, macropain) subunit, beta type, 7 [Source:HGNC Symbol;Acc:HGNC:9544]		0.07581227436823104	2	ENSP00000393157,ENSP00000259457	2	2	11	0.000749056	0.00101792	0.0312306	8.42229e+06
ENSP00000259470	ENSG00000136943	CTSV	cathepsin V [Source:HGNC Symbol;Acc:HGNC:2538]		0.10479041916167664	2	ENSP00000445052,ENSP00000259470	3	3	7	0.000275095	0.000460765	0.0172042	135875435
ENSP00000259526	ENSG00000136999	NOV	nephroblastoma overexpressed [Source:HGNC Symbol;Acc:HGNC:7885]		0.15406162464985995	1	ENSP00000259526	4	4	13	1.45098e-13	0.000157101	0.00699383	1.46857e+07
ENSP00000259727	ENSG00000137198	GMPR	guanosine monophosphate reductase [Source:HGNC Symbol;Acc:HGNC:4376]		0.11884057971014493	1	ENSP00000259727	2	2	3	1.59862e-06	0.000460765	0.0172042	1740963
ENSP00000259989	ENSG00000137441	FGFBP2	fibroblast growth factor binding protein 2 [Source:HGNC Symbol;Acc:HGNC:29451]		0.04932735426008968	1	ENSP00000259989	1	1	9	3.18922e-05	0.000157101	0.00699383	1.65136e+07
ENSP00000260010	ENSG00000137462	TLR2	toll-like receptor 2 [Source:HGNC Symbol;Acc:HGNC:11848]		0.05612244897959184	1	ENSP00000260010	3	3	4	0.000807719	0.000460765	0.0172042	1.22471e+06
ENSP00000260061	ENSG00000137507	LRRC32	leucine rich repeat containing 32 [Source:HGNC Symbol;Acc:HGNC:4161]		0.0755287009063444	3	ENSP00000384126,ENSP00000260061,ENSP00000385766	3	3	9	1.94387e-06	0.000460765	0.0172042	6.06164e+06
ENSP00000260118	ENSG00000137563	GGH	gamma-glutamyl hydrolase (conjugase, folylpolygammaglutamyl hydrolase) [Source:HGNC Symbol;Acc:HGNC:4248]		0.16037735849056603	1	ENSP00000260118	7	7	157	3.1018e-14	0.000157101	0.00699383	2.14476e+09
ENSP00000260227	ENSG00000137673	MMP7	matrix metallopeptidase 7 [Source:HGNC Symbol;Acc:HGNC:7174]		0.12359550561797752	6	ENSP00000456518,ENSP00000260227,ENSP00000219070,ENSP00000461421,ENSP00000394237,ENSP00000444143	2	3	14	6.97443e-07	0.000157101	0.00699383	3.13862e+06
ENSP00000260356	ENSG00000137801	THBS1	thrombospondin 1 [Source:HGNC Symbol;Acc:HGNC:11785]		0.2811965811965812	2	ENSP00000260356,ENSP00000380720	26	26	197	1.3966e-111	0.000157101	0.00699383	1.3357e+09
ENSP00000260385	ENSG00000137824	RMDN3	regulator of microtubule dynamics 3 [Source:HGNC Symbol;Acc:HGNC:25550]		0.16382978723404254	5	ENSP00000453978,ENSP00000260385,ENSP00000453535,ENSP00000342493,ENSP00000453199	7	7	13	1.35617e-19	0.000157101	0.00699383	3.69199e+06
ENSP00000260408	ENSG00000137845	ADAM10	ADAM metallopeptidase domain 10 [Source:HGNC Symbol;Acc:HGNC:188]		0.07754010695187166	2	ENSP00000391930,ENSP00000260408	5	5	24	1.72455e-19	0.000157101	0.00699383	2.56771e+08
ENSP00000260595	ENSG00000138028	CGREF1	cell growth regulator with EF-hand domain 1 [Source:HGNC Symbol;Acc:HGNC:16962]		0.2591362126245847	5	ENSP00000260595,ENSP00000386113,ENSP00000385452,ENSP00000385574,ENSP00000324025	4	4	35	1.28097e-21	0.000157101	0.00699383	80399708
ENSP00000260598	ENSG00000138030	KHK	ketohexokinase (fructokinase) [Source:HGNC Symbol;Acc:HGNC:6315]		0.14093959731543623	3	ENSP00000260598,ENSP00000404741,ENSP00000260599	1	2	12	1.36831e-07	0.000157101	0.00699383	2.33112e+07
ENSP00000260599	ENSG00000138030	KHK	ketohexokinase (fructokinase) [Source:HGNC Symbol;Acc:HGNC:6315]		0.1174496644295302	2	ENSP00000260598,ENSP00000260599	1	2	2	0.00516949	0.000460765	0.0172042	1353338
ENSP00000260641	ENSG00000138071	ACTR2	ARP2 actin-related protein 2 homolog (yeast) [Source:HGNC Symbol;Acc:HGNC:169]		0.11421319796954314	3	ENSP00000260641,ENSP00000437383,ENSP00000367220	3	3	4	3.51782e-06	0.000157101	0.00699383	20497063
ENSP00000260943	ENSG00000178568	ERBB4	erb-b2 receptor tyrosine kinase 4 [Source:HGNC Symbol;Acc:HGNC:3432]		0.1121751025991792	5	ENSP00000342235,ENSP00000385565,ENSP00000403204,ENSP00000260943,ENSP00000405564	5	5	28	1.13678e-15	0.000157101	0.00699383	8.01382e+08
ENSP00000260950	ENSG00000138379	MSTN	myostatin [Source:HGNC Symbol;Acc:HGNC:4223]		0.21333333333333335	1	ENSP00000260950	7	7	49	8.70753e-32	0.000157101	0.00699383	4.92408e+07
ENSP00000260956	ENSG00000138385	SSB	Sjogren syndrome antigen B (autoantigen La) [Source:HGNC Symbol;Acc:HGNC:11316]		0.05392156862745098	2	ENSP00000386636,ENSP00000260956	2	2	4	1.76521e-06	0.000460765	0.0172042	951073024
ENSP00000260985	ENSG00000138413	IDH1	isocitrate dehydrogenase 1 (NADP+), soluble [Source:HGNC Symbol;Acc:HGNC:5382]		0.1956521739130435	6	ENSP00000410513,ENSP00000391075,ENSP00000409045,ENSP00000390265,ENSP00000260985,ENSP00000396787	10	10	75	4.01919e-33	0.000157101	0.00699383	1.2393e+08
ENSP00000261070	ENSG00000138495	COX17	COX17 cytochrome c oxidase copper chaperone [Source:HGNC Symbol;Acc:HGNC:2264]		0.25396825396825395	4	ENSP00000417805,ENSP00000261070,ENSP00000417651,ENSP00000417923	1	1	2	0.000391905	0.000460765	0.0172042	NA
ENSP00000261180	ENSG00000072657	TRHDE	thyrotropin-releasing hormone degrading enzyme [Source:HGNC Symbol;Acc:HGNC:30748]		0.1787109375	2	ENSP00000261180,ENSP00000447822	10	10	65	9.09249e-33	0.000157101	0.00699383	87177228
ENSP00000261267	ENSG00000090382	LYZ	lysozyme [Source:HGNC Symbol;Acc:HGNC:6740]		0.3310810810810811	3	ENSP00000449969,ENSP00000449898,ENSP00000261267	1	2	39	4.06327e-08	0.000157101	0.00699383	5.69609e+07
ENSP00000261292	ENSG00000101670	LIPG	lipase, endothelial [Source:HGNC Symbol;Acc:HGNC:6623]		0.104	4	ENSP00000387978,ENSP00000462420,ENSP00000261292,ENSP00000463835	3	3	30	1.68846e-22	0.000157101	0.00699383	7.09019e+08
ENSP00000261313	ENSG00000089220	PEBP1	phosphatidylethanolamine binding protein 1 [Source:HGNC Symbol;Acc:HGNC:8630]		0.32620320855614976	1	ENSP00000261313	4	4	76	4.34327e-24	0.000157101	0.00699383	3.79173e+09
ENSP00000261336	ENSG00000126838	PZP	pregnancy-zone protein [Source:HGNC Symbol;Acc:HGNC:9750]		0.28609986504723345	3	ENSP00000323929,ENSP00000440811,ENSP00000261336	35	38	539	5.83527e-141	0.000157101	0.00699383	12253476864
ENSP00000261366	ENSG00000113368	LMNB1	lamin B1 [Source:HGNC Symbol;Acc:HGNC:6637]		0.21331058020477817	14	ENSP00000486528,ENSP00000395597,ENSP00000357282,ENSP00000421821,ENSP00000327054,ENSP00000261366,ENSP00000357283,ENSP00000424977,ENSP00000357280,ENSP00000357284,ENSP00000486992,ENSP00000355292,ENSP00000378761,ENSP00000292304	10	11	42	2.84387e-42	0.000157101	0.00699383	4.52609e+09
ENSP00000261381	ENSG00000103489	XYLT1	xylosyltransferase I [Source:HGNC Symbol;Acc:HGNC:15516]		0.023983315954118872	1	ENSP00000261381	2	2	4	2.84023e-06	0.000460765	0.0172042	44984304
ENSP00000261401	ENSG00000110880	CORO1C	coronin, actin binding protein, 1C [Source:HGNC Symbol;Acc:HGNC:2254]		0.06329113924050633	12	ENSP00000447989,ENSP00000449330,ENSP00000448527,ENSP00000447534,ENSP00000261401,ENSP00000415554,ENSP00000438341,ENSP00000448130,ENSP00000447049,ENSP00000448195,ENSP00000447337,ENSP00000394496	2	2	3	7.54275e-06	0.000157101	0.00699383	2070555
ENSP00000261405	ENSG00000110799	VWF	von Willebrand factor [Source:HGNC Symbol;Acc:HGNC:12726]		0.34873800213295414	1	ENSP00000261405	88	88	1791	0	0.000157101	0.00699383	20683884544
ENSP00000261483	ENSG00000112893	MAN2A1	mannosidase, alpha, class 2A, member 1 [Source:HGNC Symbol;Acc:HGNC:6824]		0.22727272727272727	1	ENSP00000261483	24	24	253	3.58502e-104	0.000157101	0.00699383	3.59203e+09
ENSP00000261590	ENSG00000046604	DSG2	desmoglein 2 [Source:HGNC Symbol;Acc:HGNC:3049]		0.20483005366726298	2	ENSP00000261590,ENSP00000462503	20	20	414	3.42191e-100	0.000157101	0.00699383	2.33327e+09
ENSP00000261615	ENSG00000015413	DPEP1	dipeptidase 1 (renal) [Source:HGNC Symbol;Acc:HGNC:3002]		0.08029197080291971	3	ENSP00000261615,ENSP00000397313,ENSP00000376807	4	4	34	5.72627e-16	0.000157101	0.00699383	3.84942e+09
ENSP00000261712	ENSG00000108671	PSMD11	proteasome (prosome, macropain) 26S subunit, non-ATPase, 11 [Source:HGNC Symbol;Acc:HGNC:9556]		0.11374407582938388	3	ENSP00000393185,ENSP00000261712,ENSP00000464434	4	4	10	1.51547e-10	0.000157101	0.00699383	4.14444e+06
ENSP00000261714	ENSG00000108578	BLMH	bleomycin hydrolase [Source:HGNC Symbol;Acc:HGNC:1059]		0.26593406593406593	6	ENSP00000261714,ENSP00000468486,ENSP00000462353,ENSP00000468681,ENSP00000466948,ENSP00000462442	8	8	31	2.13349e-25	0.000157101	0.00699383	9.91339e+08
ENSP00000261735	ENSG00000089248	ERP29	endoplasmic reticulum protein 29 [Source:HGNC Symbol;Acc:HGNC:13799]		0.24521072796934865	3	ENSP00000261735,ENSP00000449018,ENSP00000447472	4	4	10	2.59373e-12	0.000460765	0.0172042	1.90269e+08
ENSP00000261755	ENSG00000103876	FAH	fumarylacetoacetate hydrolase (fumarylacetoacetase) [Source:HGNC Symbol;Acc:HGNC:3579]		0.19331742243436753	5	ENSP00000261755,ENSP00000385080,ENSP00000454271,ENSP00000453347,ENSP00000453152	7	7	56	3.00016e-34	0.000157101	0.00699383	1.75322e+08
ENSP00000261758	ENSG00000117899	MESDC2	mesoderm development candidate 2 [Source:HGNC Symbol;Acc:HGNC:13520]		0.21794871794871795	3	ENSP00000453430,ENSP00000482455,ENSP00000261758	4	4	13	6.96717e-10	0.000460765	0.0172042	2.58498e+08
ENSP00000261769	ENSG00000039068	CDH1	cadherin 1, type 1, E-cadherin (epithelial) [Source:HGNC Symbol;Acc:HGNC:1748]		0.2437641723356009	10	ENSP00000261769,ENSP00000481063,ENSP00000414946,ENSP00000458139,ENSP00000264012,ENSP00000463170,ENSP00000398485,ENSP00000480664,ENSP00000454782,ENSP00000478360	15	16	153	2.04208e-67	0.000157101	0.00699383	265347776
ENSP00000261772	ENSG00000090861	AARS	alanyl-tRNA synthetase [Source:HGNC Symbol;Acc:HGNC:20]		0.10743801652892562	1	ENSP00000261772	7	7	9	3.40922e-18	0.000157101	0.00699383	1.25676e+07
ENSP00000261799	ENSG00000113721	PDGFRB	platelet-derived growth factor receptor, beta polypeptide [Source:HGNC Symbol;Acc:HGNC:8804]		0.05244122965641953	3	ENSP00000430026,ENSP00000261799,ENSP00000429218	5	5	45	2.65854e-22	0.000157101	0.00699383	2.99933e+07
ENSP00000261883	ENSG00000138615	CILP	cartilage intermediate layer protein, nucleotide pyrophosphohydrolase [Source:HGNC Symbol;Acc:HGNC:1980]		0.11148648648648649	1	ENSP00000261883	11	11	51	1.04654e-35	0.000157101	0.00699383	2233672128
ENSP00000261918	ENSG00000138623	SEMA7A	semaphorin 7A, GPI membrane anchor (John Milton Hagen blood group) [Source:HGNC Symbol;Acc:HGNC:10741]		0.25375375375375375	4	ENSP00000438966,ENSP00000261918,ENSP00000441493,ENSP00000454365	12	12	84	1.28873e-50	0.000157101	0.00699383	646771120
ENSP00000261921	ENSG00000129038	LOXL1	lysyl oxidase-like 1 [Source:HGNC Symbol;Acc:HGNC:6665]		0.10975609756097561	1	ENSP00000261921	3	3	3	0.00878916	0.00126687	0.0366317	4080068
ENSP00000261944	ENSG00000074276	CDHR2	cadherin-related family member 2 [Source:HGNC Symbol;Acc:HGNC:18231]		0.12442748091603054	3	ENSP00000424565,ENSP00000421078,ENSP00000261944	12	12	40	4.63695e-33	0.000157101	0.00699383	1.41064e+08
ENSP00000262094	ENSG00000041353	RAB27B	RAB27B, member RAS oncogene family [Source:HGNC Symbol;Acc:HGNC:9767]		0.05045871559633028	1	ENSP00000262094	1	1	3	0.0082273	0.00101792	0.0312306	1978416
ENSP00000262193	ENSG00000008018	PSMB1	proteasome (prosome, macropain) subunit, beta type, 1 [Source:HGNC Symbol;Acc:HGNC:9537]		0.26141078838174275	1	ENSP00000262193	5	5	33	1.88627e-13	0.000157101	0.00699383	2.04081e+09
ENSP00000262407	ENSG00000005961	ITGA2B	integrin, alpha 2b (platelet glycoprotein IIb of IIb/IIIa complex, antigen CD41) [Source:HGNC Symbol;Acc:HGNC:6138]		0.05389797882579403	2	ENSP00000262407,ENSP00000467269	4	4	13	7.61645e-15	0.000157101	0.00699383	8.13013e+06
ENSP00000262418	ENSG00000004939	SLC4A1	solute carrier family 4 (anion exchanger), member 1 (Diego blood group) [Source:HGNC Symbol;Acc:HGNC:11027]		0.1437980241492865	2	ENSP00000262418,ENSP00000382190	8	8	32	7.15955e-37	0.000157101	0.00699383	1.66884e+07
ENSP00000262428	ENSG00000103187	COTL1	coactosin-like F-actin binding protein 1 [Source:HGNC Symbol;Acc:HGNC:18304]		0.3028169014084507	2	ENSP00000262428,ENSP00000457033	4	4	24	9.28881e-12	0.000157101	0.00699383	1.45863e+09
ENSP00000262455	ENSG00000023318	ERP44	endoplasmic reticulum protein 44 [Source:HGNC Symbol;Acc:HGNC:18311]		0.17733990147783252	1	ENSP00000262455	6	6	82	4.48282e-22	0.000157101	0.00699383	398142280
ENSP00000262487	ENSG00000101230	ISM1	isthmin 1, angiogenesis inhibitor [Source:HGNC Symbol;Acc:HGNC:16213]		0.05603448275862069	1	ENSP00000262487	2	2	13	1.29665e-06	0.000460765	0.0172042	47733827
ENSP00000262551	ENSG00000106809	OGN	osteoglycin [Source:HGNC Symbol;Acc:HGNC:8126]		0.3288590604026846	3	ENSP00000396709,ENSP00000262551,ENSP00000364711	7	7	96	9.38547e-33	0.000157101	0.00699383	2582349888
ENSP00000262613	ENSG00000109062	SLC9A3R1	solute carrier family 9, subfamily A (NHE3, cation proton antiporter 3), member 3 regulator 1 [Source:HGNC Symbol;Acc:HGNC:11075]		0.24581005586592178	4	ENSP00000464321,ENSP00000262613,ENSP00000464982,ENSP00000464117	6	6	18	2.92438e-19	0.000157101	0.00699383	479268322
ENSP00000262626	ENSG00000105707	HPN	hepsin [Source:HGNC Symbol;Acc:HGNC:5155]		0.1223021582733813	4	ENSP00000262626,ENSP00000376060,ENSP00000470327,ENSP00000472310	3	3	8	2.34582e-15	0.000157101	0.00699383	20000930
ENSP00000262644	ENSG00000104331	IMPAD1	inositol monophosphatase domain containing 1 [Source:HGNC Symbol;Acc:HGNC:26019]		0.28969359331476324	1	ENSP00000262644	5	5	16	2.40737e-21	0.000157101	0.00699383	1.33424e+07
ENSP00000262753	ENSG00000124429	POF1B	premature ovarian failure, 1B [Source:HGNC Symbol;Acc:HGNC:13711]		0.0865874363327674	2	ENSP00000362238,ENSP00000262753	3	3	8	7.83818e-12	0.000157101	0.00699383	9.96949e+06
ENSP00000262768	ENSG00000035862	TIMP2	TIMP metallopeptidase inhibitor 2 [Source:HGNC Symbol;Acc:HGNC:11821]		0.2	6	ENSP00000464930,ENSP00000465968,ENSP00000441724,ENSP00000468296,ENSP00000467584,ENSP00000262768	5	5	67	8.70468e-31	0.000157101	0.00699383	65514188
ENSP00000262776	ENSG00000108679	LGALS3BP	lectin, galactoside-binding, soluble, 3 binding protein [Source:HGNC Symbol;Acc:HGNC:6564]		0.18974358974358974	9	ENSP00000467211,ENSP00000468480,ENSP00000466850,ENSP00000262776,ENSP00000468774,ENSP00000465729,ENSP00000465380,ENSP00000465120,ENSP00000468586	8	8	214	1.77388e-43	0.000157101	0.00699383	4.38079e+09
ENSP00000262947	ENSG00000074842	MYDGF	myeloid-derived growth factor [Source:HGNC Symbol;Acc:HGNC:16948]		0.3236994219653179	3	ENSP00000469136,ENSP00000469945,ENSP00000262947	4	4	30	4.28102e-11	0.000157101	0.00699383	2.59317e+08
ENSP00000262948	ENSG00000126934	MAP2K2	mitogen-activated protein kinase kinase 2 [Source:HGNC Symbol;Acc:HGNC:6842]		0.1725	4	ENSP00000456438,ENSP00000302486,ENSP00000378336,ENSP00000262948	3	4	13	3.71889e-12	0.000157101	0.00699383	1.0119e+09
ENSP00000263045	ENSG00000096006	CRISP3	cysteine-rich secretory protein 3 [Source:HGNC Symbol;Acc:HGNC:16904]		0.1434108527131783	3	ENSP00000263045,ENSP00000360201,ENSP00000389026	3	3	284	2.08137e-16	0.000157101	0.00699383	1155765648
ENSP00000263087	ENSG00000083457	ITGAE	integrin, alpha E (antigen CD103, human mucosal lymphocyte antigen 1; alpha polypeptide) [Source:HGNC Symbol;Acc:HGNC:6147]		0.03986429177268872	1	ENSP00000263087	4	4	27	1.00764e-12	0.000157101	0.00699383	8.99911e+07
ENSP00000263100	ENSG00000121410	A1BG	alpha-1-B glycoprotein [Source:HGNC Symbol;Acc:HGNC:5]		0.5272727272727272	2	ENSP00000263100,ENSP00000470909	20	20	2102	5.44613e-126	0.000157101	0.00699383	22793114624
ENSP00000263168	ENSG00000116489	CAPZA1	capping protein (actin filament) muscle Z-line, alpha 1 [Source:HGNC Symbol;Acc:HGNC:1488]		0.2727272727272727	1	ENSP00000263168	4	4	28	4.32235e-17	0.000157101	0.00699383	1.06541e+08
ENSP00000263354	ENSG00000105402	NAPA	N-ethylmaleimide-sensitive factor attachment protein, alpha [Source:HGNC Symbol;Acc:HGNC:7641]		0.3525423728813559	10	ENSP00000471261,ENSP00000472235,ENSP00000470954,ENSP00000263354,ENSP00000470654,ENSP00000471520,ENSP00000470946,ENSP00000471018,ENSP00000470665,ENSP00000472667	9	9	57	7.60523e-33	0.000157101	0.00699383	3.78904e+08
ENSP00000263379	ENSG00000104998	IL27RA	interleukin 27 receptor, alpha [Source:HGNC Symbol;Acc:HGNC:17290]		0.10849056603773585	1	ENSP00000263379	3	3	18	1.56361e-20	0.000157101	0.00699383	2.58887e+08
ENSP00000263388	ENSG00000074181	NOTCH3	notch 3 [Source:HGNC Symbol;Acc:HGNC:7883]		0.0995260663507109	2	ENSP00000263388,ENSP00000473138	12	12	110	5.70133e-73	0.000157101	0.00699383	761656736
ENSP00000263408	ENSG00000113600	C9	complement component 9 [Source:HGNC Symbol;Acc:HGNC:1358]		0.6851520572450805	3	ENSP00000386694,ENSP00000263408,ENSP00000258390	43	43	4432	1.59819e-190	0.000157101	0.00699383	19137773568
ENSP00000263409	ENSG00000113594	LIFR	leukemia inhibitory factor receptor alpha [Source:HGNC Symbol;Acc:HGNC:6597]		0.05013673655423884	3	ENSP00000426685,ENSP00000398368,ENSP00000263409	6	6	37	2.626e-20	0.000157101	0.00699383	4.93085e+07
ENSP00000263413	ENSG00000039537	C6	complement component 6 [Source:HGNC Symbol;Acc:HGNC:1339]		0.6177730192719486	3	ENSP00000263413,ENSP00000338861,ENSP00000396565	52	52	3468	8,607e-321	0.000157101	0.00699383	19710113792
ENSP00000263451	ENSG00000066468	FGFR2	fibroblast growth factor receptor 2 [Source:HGNC Symbol;Acc:HGNC:3689]		0.03418803418803419	15	ENSP00000481464,ENSP00000352309,ENSP00000263451,ENSP00000309878,ENSP00000358057,ENSP00000351276,ENSP00000358054,ENSP00000350166,ENSP00000348559,ENSP00000474011,ENSP00000410294,ENSP00000484154,ENSP00000358052,ENSP00000337665,ENSP00000358056	2	2	12	1.59625e-11	0.000157101	0.00699383	17521228
ENSP00000263525	ENSG00000116147	TNR	tenascin R [Source:HGNC Symbol;Acc:HGNC:11953]		0.041237113402061855	3	ENSP00000263525,ENSP00000356646,ENSP00000403413	3	3	4	1.50778e-06	0.000460765	0.0172042	329628
ENSP00000263574	ENSG00000084234	APLP2	amyloid beta (A4) precursor-like protein 2 [Source:HGNC Symbol;Acc:HGNC:598]		0.10484927916120576	7	ENSP00000263574,ENSP00000434379,ENSP00000263575,ENSP00000435914,ENSP00000345444,ENSP00000278756,ENSP00000434059	6	6	15	7.47559e-15	0.000157101	0.00699383	9.83283e+06
ENSP00000263577	ENSG00000064309	CDON	cell adhesion associated, oncogene regulated [Source:HGNC Symbol;Acc:HGNC:17104]		0.09651898734177215	8	ENSP00000376458,ENSP00000436755,ENSP00000263577,ENSP00000432901,ENSP00000273395,ENSP00000418663,ENSP00000347546,ENSP00000432571	6	7	32	1.12578e-21	0.000157101	0.00699383	8.02143e+07
ENSP00000263579	ENSG00000110063	DCPS	decapping enzyme, scavenger [Source:HGNC Symbol;Acc:HGNC:29812]		0.10089020771513353	1	ENSP00000263579	2	2	20	2.61911e-10	0.000157101	0.00699383	5.9216e+07
ENSP00000263598	ENSG00000160349	LCN1	lipocalin 1 [Source:HGNC Symbol;Acc:HGNC:6525]		0.23863636363636365	2	ENSP00000360846,ENSP00000263598	3	3	27	1.56749e-12	0.000157101	0.00699383	5.9765e+07
ENSP00000263665	ENSG00000113805	CNTN3	contactin 3 (plasmacytoma associated) [Source:HGNC Symbol;Acc:HGNC:2173]		0.23054474708171208	1	ENSP00000263665	19	19	134	5.92214e-89	0.000157101	0.00699383	4.99237e+08
ENSP00000263671	ENSG00000054938	CHRDL2	chordin-like 2 [Source:HGNC Symbol;Acc:HGNC:24168]		0.188470066518847	5	ENSP00000431380,ENSP00000365510,ENSP00000482669,ENSP00000263671,ENSP00000434257	5	5	19	3.00758e-17	0.000157101	0.00699383	51716064
ENSP00000263688	ENSG00000094975	SUCO	SUN domain containing ossification factor [Source:HGNC Symbol;Acc:HGNC:1240]		0.03907496012759171	4	ENSP00000356696,ENSP00000477484,ENSP00000263688,ENSP00000476704	4	4	20	7.52889e-11	0.000157101	0.00699383	3.75474e+07
ENSP00000263733	ENSG00000116199	FAM20B	family with sequence similarity 20, member B [Source:HGNC Symbol;Acc:HGNC:23017]		0.2371638141809291	2	ENSP00000263733,ENSP00000404005	6	6	37	9.49612e-25	0.000157101	0.00699383	41408618
ENSP00000263847	ENSG00000110048	OSBP	oxysterol binding protein [Source:HGNC Symbol;Acc:HGNC:8503]		0.04708798017348203	2	ENSP00000432399,ENSP00000263847	3	3	8	7.61789e-11	0.000460765	0.0172042	2.99411e+06
ENSP00000263923	ENSG00000128052	KDR	kinase insert domain receptor [Source:HGNC Symbol;Acc:HGNC:6307]		0.08702064896755163	1	ENSP00000263923	8	8	21	1.59235e-32	0.000157101	0.00699383	330753136
ENSP00000263932	ENSG00000120949	TNFRSF8	tumor necrosis factor receptor superfamily, member 8 [Source:HGNC Symbol;Acc:HGNC:11923]		0.031932773109243695	3	ENSP00000398337,ENSP00000263932,ENSP00000390650	2	2	4	0.000483579	0.000460765	0.0172042	1.14334e+07
ENSP00000263967	ENSG00000121879	PIK3CA	phosphatidylinositol-4,5-bisphosphate 3-kinase, catalytic subunit alpha [Source:HGNC Symbol;Acc:HGNC:8975]		0.02247191011235955	1	ENSP00000263967	1	1	1	0.100506	0.00963463	0.193242	147707
ENSP00000264005	ENSG00000213398	LCAT	lecithin-cholesterol acyltransferase [Source:HGNC Symbol;Acc:HGNC:6522]		0.20681818181818182	4	ENSP00000464651,ENSP00000264005,ENSP00000459014,ENSP00000463220	5	5	204	1.52873e-25	0.000157101	0.00699383	1.86324e+10
ENSP00000264028	ENSG00000095139	ARCN1	archain 1 [Source:HGNC Symbol;Acc:HGNC:649]		0.03522504892367906	4	ENSP00000352385,ENSP00000482114,ENSP00000264028,ENSP00000376599	2	2	2	0.00103399	0.000460765	0.0172042	2531381
ENSP00000264036	ENSG00000076706	MCAM	melanoma cell adhesion molecule [Source:HGNC Symbol;Acc:HGNC:6934]		0.21981424148606812	1	ENSP00000264036	12	12	560	8.77808e-70	0.000157101	0.00699383	7.2506e+09
ENSP00000264107	ENSG00000091409	ITGA6	integrin, alpha 6 [Source:HGNC Symbol;Acc:HGNC:6142]		0.1863932898415657	6	ENSP00000386896,ENSP00000406694,ENSP00000394169,ENSP00000264107,ENSP00000386614,ENSP00000413470	13	13	58	1.26739e-51	0.000157101	0.00699383	5.55417e+09
ENSP00000264161	ENSG00000115866	DARS	aspartyl-tRNA synthetase [Source:HGNC Symbol;Acc:HGNC:2678]		0.20958083832335328	6	ENSP00000404445,ENSP00000397616,ENSP00000264161,ENSP00000389867,ENSP00000387508,ENSP00000388801	8	8	21	2.76102e-18	0.000157101	0.00699383	6.55862e+07
ENSP00000264170	ENSG00000115919	KYNU	kynureninase [Source:HGNC Symbol;Acc:HGNC:6469]		0.07526881720430108	7	ENSP00000386731,ENSP00000387296,ENSP00000364928,ENSP00000264170,ENSP00000484801,ENSP00000482009,ENSP00000481930	3	3	9	9.55539e-07	0.000460765	0.0172042	33310274
ENSP00000264187	ENSG00000116962	NID1	nidogen 1 [Source:HGNC Symbol;Acc:HGNC:7821]		0.2862870890136327	2	ENSP00000355554,ENSP00000264187	26	26	267	3.66552e-128	0.000157101	0.00699383	1.92374e+09
ENSP00000264193	ENSG00000080819	CPOX	coproporphyrinogen oxidase [Source:HGNC Symbol;Acc:HGNC:2321]		0.21365638766519823	3	ENSP00000264193,ENSP00000425880,ENSP00000424924	8	8	22	1.31842e-23	0.000157101	0.00699383	580975312
ENSP00000264249	ENSG00000115526	CHST10	carbohydrate sulfotransferase 10 [Source:HGNC Symbol;Acc:HGNC:19650]		0.17134831460674158	6	ENSP00000387121,ENSP00000264249,ENSP00000387309,ENSP00000407525,ENSP00000387977,ENSP00000405922	4	4	20	8.20791e-17	0.000157101	0.00699383	1.29935e+08
ENSP00000264265	ENSG00000079257	LXN	latexin [Source:HGNC Symbol;Acc:HGNC:13347]		0.1891891891891892	2	ENSP00000419373,ENSP00000264265	2	2	3	2.10348e-08	0.000157101	0.00699383	1179682
ENSP00000264335	ENSG00000108953	YWHAE	tyrosine 3-monooxygenase/tryptophan 5-monooxygenase activation protein, epsilon [Source:HGNC Symbol;Acc:HGNC:12851]		0.4	35	ENSP00000379286,ENSP00000430072,ENSP00000461762,ENSP00000379287,ENSP00000248975,ENSP00000379288,ENSP00000371267,ENSP00000395114,ENSP00000487508,ENSP00000340989,ENSP00000306330,ENSP00000486352,ENSP00000309503,ENSP00000264335,ENSP00000429623,ENSP00000458386,ENSP00000430058,ENSP00000398599,ENSP00000238081,ENSP00000461766,ENSP00000464883,ENSP00000379281,ENSP00000379283,ENSP00000379278,ENSP00000300161…	9	10	58	2.08382e-25	0.000157101	0.00699383	45209776
ENSP00000264377	ENSG00000114948	ADAM23	ADAM metallopeptidase domain 23 [Source:HGNC Symbol;Acc:HGNC:202]		0.030048076923076924	2	ENSP00000363536,ENSP00000264377	1	1	3	9.63045e-07	0.000157101	0.00699383	4284208
ENSP00000264381	ENSG00000114200	BCHE	butyrylcholinesterase [Source:HGNC Symbol;Acc:HGNC:983]		0.4750830564784053	5	ENSP00000419505,ENSP00000264381,ENSP00000418325,ENSP00000418504,ENSP00000419804	17	18	253	2.35075e-78	0.000157101	0.00699383	8881330944
ENSP00000264405	ENSG00000138674	SEC31A	SEC31 homolog A (S. cerevisiae) [Source:HGNC Symbol;Acc:HGNC:17052]		0.018575851393188854	19	ENSP00000426569,ENSP00000426562,ENSP00000347329,ENSP00000421633,ENSP00000378721,ENSP00000424635,ENSP00000426943,ENSP00000422267,ENSP00000408027,ENSP00000424451,ENSP00000425999,ENSP00000421464,ENSP00000424336,ENSP00000400926,ENSP00000426886,ENSP00000264405,ENSP00000422371,ENSP00000309070,ENSP00000337602	2	2	4	0.00183915	0.00126687	0.0366317	3803730
ENSP00000264436	ENSG00000075340	ADD2	adducin 2 (beta) [Source:HGNC Symbol;Acc:HGNC:244]		0.06473829201101929	10	ENSP00000264436,ENSP00000347972,ENSP00000384303,ENSP00000412357,ENSP00000412681,ENSP00000388072,ENSP00000398112,ENSP00000430243,ENSP00000384677,ENSP00000414546	4	4	8	1.93408e-07	0.000460765	0.0172042	5014873
ENSP00000264474	ENSG00000121552	CSTA	cystatin A (stefin A) [Source:HGNC Symbol;Acc:HGNC:2481]		0.5204081632653061	2	ENSP00000264474,ENSP00000418891	5	5	18	1.58125e-22	0.000157101	0.00699383	114566388
ENSP00000264595	ENSG00000038002	AGA	aspartylglucosaminidase [Source:HGNC Symbol;Acc:HGNC:318]		0.21098265895953758	2	ENSP00000264595,ENSP00000423798	5	5	54	2.34033e-19	0.000157101	0.00699383	1.46e+08
ENSP00000264613	ENSG00000047457	CP	ceruloplasmin (ferroxidase) [Source:HGNC Symbol;Acc:HGNC:2295]		0.6976525821596244	5	ENSP00000418773,ENSP00000420367,ENSP00000420545,ENSP00000264613,ENSP00000426888	78	93	28773	0	0.000157101	0.00699383	25126060032
ENSP00000264639	ENSG00000108344	PSMD3	proteasome (prosome, macropain) 26S subunit, non-ATPase, 3 [Source:HGNC Symbol;Acc:HGNC:9560]		0.13295880149812733	1	ENSP00000264639	7	7	29	1.27497e-13	0.000157101	0.00699383	17955672
ENSP00000264690	ENSG00000164344	KLKB1	kallikrein B, plasma (Fletcher factor) 1 [Source:HGNC Symbol;Acc:HGNC:6371]		0.38087774294670845	5	ENSP00000412366,ENSP00000426629,ENSP00000415563,ENSP00000264690,ENSP00000424469	26	26	932	5.22932e-99	0.000157101	0.00699383	7406107648
ENSP00000264710	ENSG00000084733	RAB10	RAB10, member RAS oncogene family [Source:HGNC Symbol;Acc:HGNC:9759]		0.115	1	ENSP00000264710	2	2	6	4.07483e-06	0.000460765	0.0172042	4.74805e+06
ENSP00000264741	ENSG00000144668	ITGA9	integrin, alpha 9 [Source:HGNC Symbol;Acc:HGNC:6145]		0.10338164251207729	2	ENSP00000397258,ENSP00000264741	8	8	33	7.71164e-27	0.000157101	0.00699383	1.84018e+07
ENSP00000264790	ENSG00000138722	MMRN1	multimerin 1 [Source:HGNC Symbol;Acc:HGNC:7178]		0.15228013029315962	3	ENSP00000426461,ENSP00000378431,ENSP00000264790	12	12	102	6.30785e-61	0.000157101	0.00699383	1.09343e+09
ENSP00000264828	ENSG00000080573	COL5A3	collagen, type V, alpha 3 [Source:HGNC Symbol;Acc:HGNC:14864]		0.05501432664756447	1	ENSP00000264828	5	5	9	2.52509e-21	0.000157101	0.00699383	215494745
ENSP00000264832	ENSG00000090339	ICAM1	intercellular adhesion molecule 1 [Source:HGNC Symbol;Acc:HGNC:5344]		0.2575187969924812	3	ENSP00000264832,ENSP00000465680,ENSP00000413124	11	11	339	3.90151e-69	0.000157101	0.00699383	1.16408e+10
ENSP00000264870	ENSG00000124491	F13A1	coagulation factor XIII, A1 polypeptide [Source:HGNC Symbol;Acc:HGNC:3531]		0.4808743169398907	5	ENSP00000413334,ENSP00000264870,ENSP00000411114,ENSP00000416295,ENSP00000394693	39	39	1023	8.66425e-206	0.000157101	0.00699383	14007257600
ENSP00000264908	ENSG00000138772	ANXA3	annexin A3 [Source:HGNC Symbol;Acc:HGNC:541]		0.28792569659442724	6	ENSP00000421015,ENSP00000422281,ENSP00000264908,ENSP00000424584,ENSP00000421512,ENSP00000423068	10	10	43	9.81844e-31	0.000157101	0.00699383	447584660
ENSP00000265000	ENSG00000109586	GALNT7	polypeptide N-acetylgalactosaminyltransferase 7 [Source:HGNC Symbol;Acc:HGNC:4129]		0.1811263318112633	4	ENSP00000265000,ENSP00000427095,ENSP00000427050,ENSP00000427341	11	11	77	8.0861e-49	0.000157101	0.00699383	6.81227e+08
ENSP00000265016	ENSG00000109743	BST1	bone marrow stromal cell antigen 1 [Source:HGNC Symbol;Acc:HGNC:1118]		0.36477987421383645	5	ENSP00000423357,ENSP00000265016,ENSP00000371783,ENSP00000420925,ENSP00000424761	9	9	88	7.42949e-41	0.000157101	0.00699383	2.80206e+09
ENSP00000265023	ENSG00000113889	KNG1	kininogen 1 [Source:HGNC Symbol;Acc:HGNC:6383]		0.4363354037267081	3	ENSP00000265023,ENSP00000396025,ENSP00000287611	2	36	8419	8.04162e-05	0.00101792	0.0312306	38799588
ENSP00000265028	ENSG00000090520	DNAJB11	DnaJ (Hsp40) homolog, subfamily B, member 11 [Source:HGNC Symbol;Acc:HGNC:14889]		0.21787709497206703	3	ENSP00000414398,ENSP00000265028,ENSP00000408410	5	5	8	1.38559e-16	0.000460765	0.0172042	9.15728e+07
ENSP00000265029	ENSG00000090512	FETUB	fetuin B [Source:HGNC Symbol;Acc:HGNC:3658]		0.5366492146596858	7	ENSP00000371571,ENSP00000405438,ENSP00000396581,ENSP00000404288,ENSP00000393851,ENSP00000265029,ENSP00000371569	15	17	1690	1.55612e-79	0.000157101	0.00699383	2.08985e+10
ENSP00000265062	ENSG00000075785	RAB7A	RAB7A, member RAS oncogene family [Source:HGNC Symbol;Acc:HGNC:9788]		0.34299516908212563	5	ENSP00000417668,ENSP00000417978,ENSP00000417155,ENSP00000265062,ENSP00000417189	5	5	25	2.53444e-18	0.000157101	0.00699383	1.96017e+08
ENSP00000265077	ENSG00000038427	VCAN	versican [Source:HGNC Symbol;Acc:HGNC:2464]		0.08804475853945819	7	ENSP00000426251,ENSP00000340062,ENSP00000342768,ENSP00000265077,ENSP00000425959,ENSP00000421362,ENSP00000426715	21	21	107	2.16567e-63	0.000157101	0.00699383	1.39217e+08
ENSP00000265087	ENSG00000113739	STC2	stanniocalcin 2 [Source:HGNC Symbol;Acc:HGNC:11374]		0.2781456953642384	1	ENSP00000265087	3	3	12	1.25576e-18	0.000157101	0.00699383	5601647356
ENSP00000265112	ENSG00000113407	TARS	threonyl-tRNA synthetase [Source:HGNC Symbol;Acc:HGNC:11572]		0.040110650069156296	3	ENSP00000424387,ENSP00000387710,ENSP00000265112	2	2	2	1.62858e-09	0.000157101	0.00699383	4663238
ENSP00000265131	ENSG00000041982	TNC	tenascin C [Source:HGNC Symbol;Acc:HGNC:5318]		0.27351203998182644	8	ENSP00000339553,ENSP00000438152,ENSP00000442242,ENSP00000443478,ENSP00000265131,ENSP00000443469,ENSP00000411406,ENSP00000445380	1	40	542	2.73167e-05	0.000157101	0.00699383	1.30794e+06
ENSP00000265132	ENSG00000106927	AMBP	alpha-1-microglobulin/bikunin precursor [Source:HGNC Symbol;Acc:HGNC:453]		0.6590909090909091	3	ENSP00000265132,ENSP00000474859,ENSP00000475149	34	34	4244	1.48552e-176	0.000157101	0.00699383	2.08345e+10
ENSP00000265162	ENSG00000138792	ENPEP	glutamyl aminopeptidase (aminopeptidase A) [Source:HGNC Symbol;Acc:HGNC:3355]		0.12852664576802508	2	ENSP00000426265,ENSP00000265162	12	12	140	5.38977e-30	0.000157101	0.00699383	1.83851e+08
ENSP00000265195	ENSG00000120725	SIL1	SIL1 nucleotide exchange factor [Source:HGNC Symbol;Acc:HGNC:24624]		0.11279826464208242	8	ENSP00000378294,ENSP00000426460,ENSP00000424014,ENSP00000423662,ENSP00000421890,ENSP00000427371,ENSP00000265195,ENSP00000426858	5	5	19	1.52018e-16	0.000157101	0.00699383	2.75952e+08
ENSP00000265362	ENSG00000075213	SEMA3A	sema domain, immunoglobulin domain (Ig), short basic domain, secreted, (semaphorin) 3A [Source:HGNC Symbol;Acc:HGNC:10723]		0.11543450064850844	2	ENSP00000415260,ENSP00000265362	6	6	27	5.95598e-17	0.000157101	0.00699383	17091964
ENSP00000265371	ENSG00000099250	NRP1	neuropilin 1 [Source:HGNC Symbol;Acc:HGNC:8004]		0.3066088840736728	10	ENSP00000363956,ENSP00000363949,ENSP00000363954,ENSP00000364001,ENSP00000379317,ENSP00000363955,ENSP00000408911,ENSP00000265371,ENSP00000364009,ENSP00000390567	21	21	502	4.91483e-134	0.000157101	0.00699383	5.42451e+09
ENSP00000265379	ENSG00000172752	COL6A5	collagen, type VI, alpha 5 [Source:HGNC Symbol;Acc:HGNC:26674]		0.0160857908847185	2	ENSP00000265379,ENSP00000309762	4	4	10	5.16608e-11	0.000157101	0.00699383	3.69197e+06
ENSP00000265394	ENSG00000106066	CPVL	carboxypeptidase, vitellogenic-like [Source:HGNC Symbol;Acc:HGNC:14399]		0.13655462184873948	10	ENSP00000481092,ENSP00000403580,ENSP00000397327,ENSP00000479581,ENSP00000265394,ENSP00000387164,ENSP00000379572,ENSP00000409036,ENSP00000395690,ENSP00000417015	5	5	48	1.12846e-18	0.000157101	0.00699383	8.583e+07
ENSP00000265395	ENSG00000106049	HIBADH	3-hydroxyisobutyrate dehydrogenase [Source:HGNC Symbol;Acc:HGNC:4907]		0.14285714285714285	2	ENSP00000265395,ENSP00000390205	3	3	11	4.78869e-11	0.000157101	0.00699383	75797270
ENSP00000265417	ENSG00000069122	ADGRF5	adhesion G protein-coupled receptor F5 [Source:HGNC Symbol;Acc:HGNC:19030]		0.10326894502228826	2	ENSP00000283296,ENSP00000265417	15	15	259	6.62062e-64	0.000157101	0.00699383	1.30696e+10
ENSP00000265447	ENSG00000122359	ANXA11	annexin A11 [Source:HGNC Symbol;Acc:HGNC:535]		0.09745762711864407	4	ENSP00000361305,ENSP00000398610,ENSP00000404412,ENSP00000265447	3	3	3	3.65102e-06	0.000460765	0.0172042	6674642
ENSP00000265512	ENSG00000198099	ADH4	alcohol dehydrogenase 4 (class II), pi polypeptide [Source:HGNC Symbol;Acc:HGNC:252]		0.15789473684210525	7	ENSP00000424583,ENSP00000265512,ENSP00000427525,ENSP00000425416,ENSP00000424630,ENSP00000423571,ENSP00000486450	6	6	19	8.25791e-18	0.000157101	0.00699383	22043885
ENSP00000265517	ENSG00000138823	MTTP	microsomal triglyceride transfer protein [Source:HGNC Symbol;Acc:HGNC:7467]		0.1040268456375839	6	ENSP00000265517,ENSP00000427679,ENSP00000407350,ENSP00000426755,ENSP00000482850,ENSP00000400821	9	9	46	5.08723e-28	0.000157101	0.00699383	3.01283e+08
ENSP00000265523	ENSG00000106605	BLVRA	biliverdin reductase A [Source:HGNC Symbol;Acc:HGNC:1062]		0.0472972972972973	2	ENSP00000385757,ENSP00000265523	1	1	5	0.00110306	0.000460765	0.0172042	3.10122e+06
ENSP00000265627	ENSG00000105852	PON3	paraoxonase 3 [Source:HGNC Symbol;Acc:HGNC:9206]		0.327683615819209	3	ENSP00000413276,ENSP00000403850,ENSP00000265627	10	10	120	1.68582e-43	0.000157101	0.00699383	1.3982e+09
ENSP00000265634	ENSG00000106236	NPTX2	neuronal pentraxin II [Source:HGNC Symbol;Acc:HGNC:7953]		0.048723897911832945	1	ENSP00000265634	2	2	4	1.75109e-05	0.000460765	0.0172042	440132
ENSP00000265654	ENSG00000110427	KIAA1549L	KIAA1549-like [Source:HGNC Symbol;Acc:HGNC:24836]		0.012145748987854251	2	ENSP00000265654,ENSP00000315295	1	1	2	7.78166e-05	0.000157101	0.00699383	NA
ENSP00000265678	ENSG00000071242	RPS6KA2	ribosomal protein S6 kinase, 90kDa, polypeptide 2 [Source:HGNC Symbol;Acc:HGNC:10431]		0.06002728512960437	25	ENSP00000486881,ENSP00000425148,ENSP00000487553,ENSP00000435412,ENSP00000422484,ENSP00000487239,ENSP00000423114,ENSP00000383967,ENSP00000422197,ENSP00000431651,ENSP00000433039,ENSP00000265678,ENSP00000363283,ENSP00000486179,ENSP00000386050,ENSP00000388512,ENSP00000363281,ENSP00000368884,ENSP00000432281,ENSP00000407655,ENSP00000427015,ENSP00000487349,ENSP00000486031,ENSP00000487166,ENSP00000422435	3	3	5	1.06551e-05	0.000460765	0.0172042	2.19432e+06
ENSP00000265754	ENSG00000106682	EIF4H	eukaryotic translation initiation factor 4H [Source:HGNC Symbol;Acc:HGNC:12741]		0.05701754385964912	2	ENSP00000265753,ENSP00000265754	1	1	4	0.00516949	0.000460765	0.0172042	2.11181e+06
ENSP00000265838	ENSG00000075239	ACAT1	acetyl-CoA acetyltransferase 1 [Source:HGNC Symbol;Acc:HGNC:93]		0.14285714285714285	2	ENSP00000265838,ENSP00000436096	3	3	3	0.00214087	0.000460765	0.0172042	NA
ENSP00000265983	ENSG00000110169	HPX	hemopexin [Source:HGNC Symbol;Acc:HGNC:5171]		0.6320346320346321	2	ENSP00000265983,ENSP00000479146	37	37	16587	4.57489e-173	0.000157101	0.00699383	23983460352
ENSP00000265986	ENSG00000119912	IDE	insulin-degrading enzyme [Source:HGNC Symbol;Acc:HGNC:5381]		0.11383709519136408	3	ENSP00000265986,ENSP00000408850,ENSP00000360637	9	9	62	4.56829e-18	0.000157101	0.00699383	3152730080
ENSP00000266027	ENSG00000114353	GNAI2	guanine nucleotide binding protein (G protein), alpha inhibiting activity polypeptide 2 [Source:HGNC Symbol;Acc:HGNC:4385]		0.18811881188118812	5	ENSP00000406369,ENSP00000395736,ENSP00000266027,ENSP00000312999,ENSP00000406871	4	4	10	6.16503e-11	0.000157101	0.00699383	3613130363
ENSP00000266041	ENSG00000055955	ITIH4	inter-alpha-trypsin inhibitor heavy chain family, member 4 [Source:HGNC Symbol;Acc:HGNC:6169]		0.6645161290322581	4	ENSP00000266041,ENSP00000395634,ENSP00000417824,ENSP00000384425	14	63	9059	2.50764e-82	0.000157101	0.00699383	1.64978e+10
ENSP00000266542	ENSG00000139178	C1RL	complement component 1, r subcomponent-like [Source:HGNC Symbol;Acc:HGNC:21265]		0.29568788501026694	6	ENSP00000438286,ENSP00000442611,ENSP00000437398,ENSP00000439180,ENSP00000266542,ENSP00000441885	11	11	964	1.56358e-60	0.000157101	0.00699383	1.1633e+10
ENSP00000266546	ENSG00000139182	CLSTN3	calsyntenin 3 [Source:HGNC Symbol;Acc:HGNC:18371]		0.10355648535564854	7	ENSP00000443468,ENSP00000442801,ENSP00000440679,ENSP00000443490,ENSP00000442612,ENSP00000266546,ENSP00000443959	7	7	46	1.22234e-40	0.000157101	0.00699383	2.56316e+08
ENSP00000266557	ENSG00000139193	CD27	CD27 molecule [Source:HGNC Symbol;Acc:HGNC:11922]		0.06923076923076923	1	ENSP00000266557	1	1	2	0.00145802	0.000460765	0.0172042	574705
ENSP00000266581	ENSG00000139211	AMIGO2	adhesion molecule with Ig-like domain 2 [Source:HGNC Symbol;Acc:HGNC:24073]		0.05747126436781609	3	ENSP00000266581,ENSP00000449034,ENSP00000406020	2	2	12	9.32988e-13	0.000157101	0.00699383	2.04793e+08
ENSP00000266718	ENSG00000139329	LUM	lumican [Source:HGNC Symbol;Acc:HGNC:6724]		0.4319526627218935	1	ENSP00000266718	18	18	2768	8.60967e-86	0.000157101	0.00699383	18148480000
ENSP00000266736	ENSG00000139344	AMDHD1	amidohydrolase domain containing 1 [Source:HGNC Symbol;Acc:HGNC:28577]		0.07042253521126761	1	ENSP00000266736	3	3	5	0.000684834	0.00181664	0.0491923	13981908
ENSP00000267082	ENSG00000139626	ITGB7	integrin, beta 7 [Source:HGNC Symbol;Acc:HGNC:6162]		0.09273182957393483	7	ENSP00000450366,ENSP00000437375,ENSP00000456305,ENSP00000408741,ENSP00000267082,ENSP00000446703,ENSP00000455374	5	5	26	7.33666e-22	0.000157101	0.00699383	1.364e+09
ENSP00000267485	ENSG00000139971	C14orf37	chromosome 14 open reading frame 37 [Source:HGNC Symbol;Acc:HGNC:19846]		0.1020671834625323	1	ENSP00000267485	5	5	30	4.08833e-25	0.000157101	0.00699383	23736252
ENSP00000267814	ENSG00000140263	SORD	sorbitol dehydrogenase [Source:HGNC Symbol;Acc:HGNC:11184]		0.1400560224089636	4	ENSP00000453904,ENSP00000452731,ENSP00000267814,ENSP00000453122	3	3	22	7.70435e-17	0.000157101	0.00699383	1.37107e+07
ENSP00000268097	ENSG00000213614	HEXA	hexosaminidase A (alpha polypeptide) [Source:HGNC Symbol;Acc:HGNC:4878]		0.22684310018903592	6	ENSP00000456489,ENSP00000457521,ENSP00000457125,ENSP00000478716,ENSP00000455114,ENSP00000268097	13	13	121	6.92546e-28	0.000157101	0.00699383	4.62037e+09
ENSP00000268171	ENSG00000140564	FURIN	furin (paired basic amino acid cleaving enzyme) [Source:HGNC Symbol;Acc:HGNC:8568]		0.12720403022670027	5	ENSP00000453212,ENSP00000483552,ENSP00000484952,ENSP00000268171,ENSP00000453942	8	8	18	1.58403e-19	0.000157101	0.00699383	3.30417e+07
ENSP00000268182	ENSG00000140575	IQGAP1	IQ motif containing GTPase activating protein 1 [Source:HGNC Symbol;Acc:HGNC:6110]		0.13035606517803258	3	ENSP00000480393,ENSP00000268182,ENSP00000453181	14	14	36	1.63263e-44	0.000157101	0.00699383	4.21556e+07
ENSP00000268603	ENSG00000140937	CDH11	cadherin 11, type 2, OB-cadherin (osteoblast) [Source:HGNC Symbol;Acc:HGNC:1750]		0.2876884422110553	4	ENSP00000457812,ENSP00000377711,ENSP00000455779,ENSP00000268603	13	13	139	2.9392e-73	0.000157101	0.00699383	4.17718e+09
ENSP00000268695	ENSG00000141012	GALNS	galactosamine (N-acetyl)-6-sulfatase [Source:HGNC Symbol;Acc:HGNC:4122]		0.07471264367816093	2	ENSP00000268695,ENSP00000455174	4	4	9	2.69148e-10	0.000157101	0.00699383	4.05226e+06
ENSP00000268793	ENSG00000141096	DPEP3	dipeptidase 3 [Source:HGNC Symbol;Acc:HGNC:23029]		0.1793372319688109	3	ENSP00000268793,ENSP00000458977,ENSP00000377430	3	4	14	1.91866e-14	0.000157101	0.00699383	2.28048e+07
ENSP00000269141	ENSG00000170558	CDH2	cadherin 2, type 1, N-cadherin (neuronal) [Source:HGNC Symbol;Acc:HGNC:1759]		0.23951434878587197	5	ENSP00000382312,ENSP00000411360,ENSP00000412120,ENSP00000414269,ENSP00000269141	19	19	260	1.11621e-102	0.000157101	0.00699383	9.26553e+08
ENSP00000269491	ENSG00000166634	SERPINB12	serpin peptidase inhibitor, clade B (ovalbumin), member 12 [Source:HGNC Symbol;Acc:HGNC:14220]		0.05185185185185185	2	ENSP00000269491,ENSP00000372218	2	2	4	2.2304e-05	0.000157101	0.00699383	6974594
ENSP00000269503	ENSG00000141668	CBLN2	cerebellin 2 precursor [Source:HGNC Symbol;Acc:HGNC:1544]		0.16517857142857142	4	ENSP00000462632,ENSP00000463771,ENSP00000464490,ENSP00000269503	3	3	4	1.12322e-08	0.000157101	0.00699383	2914230
ENSP00000269576	ENSG00000186395	KRT10	keratin 10, type I [Source:HGNC Symbol;Acc:HGNC:6413]		0.4315068493150685	34	ENSP00000308452,ENSP00000264651,ENSP00000167586,ENSP00000246635,ENSP00000225550,ENSP00000408759,ENSP00000310573,ENSP00000485008,ENSP00000251645,ENSP00000377555,ENSP00000301656,ENSP00000447278,ENSP00000251646,ENSP00000246639,ENSP00000246646,ENSP00000468221,ENSP00000467418,ENSP00000305263,ENSP00000301653,ENSP00000329165,ENSP00000441751,ENSP00000373487,ENSP00000459509,ENSP00000225899,ENSP00000466465…	26	31	563	3.92645e-116	0.000157101	0.00699383	6.85681e+09
ENSP00000269593	ENSG00000141753	IGFBP4	insulin-like growth factor binding protein 4 [Source:HGNC Symbol;Acc:HGNC:5473]		0.1821705426356589	1	ENSP00000269593	4	4	143	3.17928e-17	0.000157101	0.00699383	5.16006e+09
ENSP00000269848	ENSG00000141959	PFKL	phosphofructokinase, liver [Source:HGNC Symbol;Acc:HGNC:8876]		0.029487179487179487	1	ENSP00000269848	2	2	3	0.00116414	0.00101792	0.0312306	2249884
ENSP00000270139	ENSG00000142166	IFNAR1	interferon (alpha, beta and omega) receptor 1 [Source:HGNC Symbol;Acc:HGNC:5432]		0.11490125673249552	2	ENSP00000400161,ENSP00000270139	4	4	24	5.51952e-13	0.000157101	0.00699383	27061457
ENSP00000270142	ENSG00000142168	SOD1	superoxide dismutase 1, soluble [Source:HGNC Symbol;Acc:HGNC:11179]		0.3246753246753247	2	ENSP00000270142,ENSP00000374645	3	3	113	3.85737e-27	0.000157101	0.00699383	2.09926e+08
ENSP00000270586	ENSG00000142507	PSMB6	proteasome (prosome, macropain) subunit, beta type, 6 [Source:HGNC Symbol;Acc:HGNC:9543]		0.07112970711297072	1	ENSP00000270586	1	1	2	6.66529e-05	0.000157101	0.00699383	17093559
ENSP00000270776	ENSG00000142657	PGD	phosphogluconate dehydrogenase [Source:HGNC Symbol;Acc:HGNC:8891]		0.2236024844720497	5	ENSP00000466574,ENSP00000466358,ENSP00000270776,ENSP00000466156,ENSP00000467362	10	10	101	2.37283e-32	0.000157101	0.00699383	1.55419e+09
ENSP00000270879	ENSG00000142748	FCN3	ficolin (collagen/fibrinogen domain containing) 3 [Source:HGNC Symbol;Acc:HGNC:3625]		0.33444816053511706	4	ENSP00000270879,ENSP00000445408,ENSP00000339569,ENSP00000347077	8	9	607	1.21689e-34	0.000157101	0.00699383	2.38175e+09
ENSP00000271064	ENSG00000142910	TINAGL1	tubulointerstitial nephritis antigen-like 1 [Source:HGNC Symbol;Acc:HGNC:19168]		0.17987152034261242	3	ENSP00000395137,ENSP00000271064,ENSP00000445392	4	4	22	1.53625e-15	0.000157101	0.00699383	8.27803e+08
ENSP00000271588	ENSG00000143341	HMCN1	hemicentin 1 [Source:HGNC Symbol;Acc:HGNC:19194]		0.1385980479148181	2	ENSP00000271588,ENSP00000406205	47	49	246	1.6829e-223	0.000157101	0.00699383	5.76628e+09
ENSP00000271630	ENSG00000143369	ECM1	extracellular matrix protein 1 [Source:HGNC Symbol;Acc:HGNC:3153]		0.5518072289156627	3	ENSP00000358045,ENSP00000358043,ENSP00000271630	1	20	1088	0.00607387	0.000755242	0.0250629	2.40122e+07
ENSP00000271638	ENSG00000163191	S100A11	S100 calcium binding protein A11 [Source:HGNC Symbol;Acc:HGNC:10488]		0.5238095238095238	1	ENSP00000271638	3	3	7	6.04059e-06	0.000157101	0.00699383	16417298
ENSP00000271690	ENSG00000143420	ENSA	endosulfine alpha [Source:HGNC Symbol;Acc:HGNC:3360]		0.3247863247863248	24	ENSP00000455986,ENSP00000455151,ENSP00000271690,ENSP00000421458,ENSP00000358012,ENSP00000455610,ENSP00000426110,ENSP00000457123,ENSP00000358010,ENSP00000341743,ENSP00000457631,ENSP00000354835,ENSP00000454341,ENSP00000454612,ENSP00000454297,ENSP00000424242,ENSP00000348921,ENSP00000457805,ENSP00000454234,ENSP00000355239,ENSP00000355220,ENSP00000249822,ENSP00000455625,ENSP00000422343	3	3	7	4.98406e-08	0.000460765	0.0172042	8.64326e+06
ENSP00000271835	ENSG00000143536	CRNN	cornulin [Source:HGNC Symbol;Acc:HGNC:1230]		0.07474747474747474	1	ENSP00000271835	2	2	5	7.14827e-11	0.000157101	0.00699383	5.31569e+06
ENSP00000272065	ENSG00000143727	ACP1	acid phosphatase 1, soluble [Source:HGNC Symbol;Acc:HGNC:122]		0.33544303797468356	4	ENSP00000385404,ENSP00000272065,ENSP00000410331,ENSP00000272067	3	3	25	7.80653e-18	0.000157101	0.00699383	191276296
ENSP00000272190	ENSG00000143839	REN	renin [Source:HGNC Symbol;Acc:HGNC:9958]		0.04433497536945813	1	ENSP00000272190	2	2	7	4.38278e-05	0.000460765	0.0172042	2184359
ENSP00000272849	ENSG00000118257	NRP2	neuropilin 2 [Source:HGNC Symbol;Acc:HGNC:8005]		0.2582781456953642	7	ENSP00000272849,ENSP00000353582,ENSP00000350432,ENSP00000404279,ENSP00000407626,ENSP00000387519,ENSP00000349632	1	19	220	2.63201e-05	0.000157101	0.00699383	5750896
ENSP00000273146	ENSG00000144649	FAM198A	family with sequence similarity 198, member A [Source:HGNC Symbol;Acc:HGNC:24485]		0.07130434782608695	3	ENSP00000273146,ENSP00000439905,ENSP00000407301	3	3	22	9.32177e-14	0.000157101	0.00699383	9.30869e+07
ENSP00000273283	ENSG00000055957	ITIH1	inter-alpha-trypsin inhibitor heavy chain 1 [Source:HGNC Symbol;Acc:HGNC:6166]		0.5082327113062569	6	ENSP00000419957,ENSP00000486334,ENSP00000417340,ENSP00000273283,ENSP00000443847,ENSP00000395836	46	62	14301	1.30363e-248	0.000157101	0.00699383	1.99616e+10
ENSP00000273347	ENSG00000144815	NXPE3	neurexophilin and PC-esterase domain family, member 3 [Source:HGNC Symbol;Acc:HGNC:28238]		0.11806797853309481	4	ENSP00000418369,ENSP00000273347,ENSP00000396421,ENSP00000417485	2	2	3	0.00539655	0.00101792	0.0312306	5723148
ENSP00000273398	ENSG00000114573	ATP6V1A	ATPase, H+ transporting, lysosomal 70kDa, V1 subunit A [Source:HGNC Symbol;Acc:HGNC:851]		0.11831442463533225	1	ENSP00000273398	5	5	14	4.79282e-22	0.000157101	0.00699383	2.74702e+07
ENSP00000273784	ENSG00000145192	AHSG	alpha-2-HS-glycoprotein [Source:HGNC Symbol;Acc:HGNC:349]		0.6304347826086957	2	ENSP00000393887,ENSP00000273784	2	23	7881	1.25715e-06	0.000460765	0.0172042	5933830
ENSP00000273920	ENSG00000145293	ENOPH1	enolase-phosphatase 1 [Source:HGNC Symbol;Acc:HGNC:24599]		0.25287356321839083	5	ENSP00000477863,ENSP00000422005,ENSP00000483615,ENSP00000273920,ENSP00000427209	4	4	10	1.71253e-15	0.000157101	0.00699383	8.54229e+07
ENSP00000273951	ENSG00000145321	GC	group-specific component (vitamin D binding protein) [Source:HGNC Symbol;Acc:HGNC:4187]		0.8481012658227848	5	ENSP00000426718,ENSP00000426683,ENSP00000273951,ENSP00000422664,ENSP00000421725	23	78	13052	7.32166e-121	0.000157101	0.00699383	20149723136
ENSP00000274024	ENSG00000145384	FABP2	fatty acid binding protein 2, intestinal [Source:HGNC Symbol;Acc:HGNC:3556]		0.08333333333333333	1	ENSP00000274024	1	1	3	0.00114486	0.000460765	0.0172042	338039464
ENSP00000274276	ENSG00000145623	OSMR	oncostatin M receptor [Source:HGNC Symbol;Acc:HGNC:8507]		0.054136874361593465	2	ENSP00000422023,ENSP00000274276	5	5	53	1.0223e-13	0.000157101	0.00699383	2.04982e+09
ENSP00000274353	ENSG00000145692	BHMT	betaine--homocysteine S-methyltransferase [Source:HGNC Symbol;Acc:HGNC:1047]		0.22413793103448276	4	ENSP00000428240,ENSP00000255192,ENSP00000274353,ENSP00000430278	5	6	26	1.84852e-23	0.000157101	0.00699383	8.08457e+07
ENSP00000274368	ENSG00000145708	CRHBP	corticotropin releasing hormone binding protein [Source:HGNC Symbol;Acc:HGNC:2356]		0.18944099378881987	2	ENSP00000274368,ENSP00000426097	5	5	38	4.57102e-25	0.000157101	0.00699383	238351820
ENSP00000274473	ENSG00000145794	MEGF10	multiple EGF-like-domains 10 [Source:HGNC Symbol;Acc:HGNC:29634]		0.10350877192982456	4	ENSP00000416284,ENSP00000274473,ENSP00000423195,ENSP00000423354	6	6	63	1.32648e-49	0.000157101	0.00699383	406339876
ENSP00000274569	ENSG00000145882	PCYOX1L	prenylcysteine oxidase 1 like [Source:HGNC Symbol;Acc:HGNC:28477]		0.038461538461538464	3	ENSP00000422063,ENSP00000428512,ENSP00000274569	2	2	6	0.000773641	0.00101792	0.0312306	18869838
ENSP00000274793	ENSG00000146070	PLA2G7	phospholipase A2, group VII (platelet-activating factor acetylhydrolase, plasma) [Source:HGNC Symbol;Acc:HGNC:9040]		0.2811791383219955	2	ENSP00000445666,ENSP00000274793	14	14	210	2.27721e-57	0.000157101	0.00699383	788483808
ENSP00000274938	ENSG00000146197	SCUBE3	signal peptide, CUB domain, EGF-like 3 [Source:HGNC Symbol;Acc:HGNC:13655]		0.05236656596173213	1	ENSP00000274938	4	4	14	1.51949e-11	0.000157101	0.00699383	173243688
ENSP00000275525	ENSG00000146678	IGFBP1	insulin-like growth factor binding protein 1 [Source:HGNC Symbol;Acc:HGNC:5469]		0.1274131274131274	2	ENSP00000413511,ENSP00000275525	3	3	3	2.75689e-06	0.000460765	0.0172042	10466836
ENSP00000275560	ENSG00000146700	SSC4D	scavenger receptor cysteine rich family, 4 domains [Source:HGNC Symbol;Acc:HGNC:14461]		0.04695652173913043	1	ENSP00000275560	2	2	14	1.42471e-09	0.000157101	0.00699383	7.13896e+08
ENSP00000275603	ENSG00000146731	CCT6A	chaperonin containing TCP1, subunit 6A (zeta 1) [Source:HGNC Symbol;Acc:HGNC:1620]		0.192090395480226	2	ENSP00000352019,ENSP00000275603	8	8	38	2.44324e-18	0.000157101	0.00699383	5.33966e+07
ENSP00000275607	ENSG00000129103	SUMF2	sulfatase modifying factor 2 [Source:HGNC Symbol;Acc:HGNC:20415]		0.18309859154929578	9	ENSP00000414434,ENSP00000378823,ENSP00000415989,ENSP00000400922,ENSP00000341938,ENSP00000275607,ENSP00000410796,ENSP00000406445,ENSP00000378824	4	4	29	2.95867e-17	0.000157101	0.00699383	1.46816e+09
ENSP00000275815	ENSG00000146904	EPHA1	EPH receptor A1 [Source:HGNC Symbol;Acc:HGNC:3385]		0.17418032786885246	1	ENSP00000275815	10	10	29	7.11453e-49	0.000157101	0.00699383	4.78153e+07
ENSP00000276105	ENSG00000147164	SNX12	sorting nexin 12 [Source:HGNC Symbol;Acc:HGNC:14976]		0.13924050632911392	4	ENSP00000363392,ENSP00000276105,ENSP00000483613,ENSP00000481314	2	2	3	8.72927e-05	0.000460765	0.0172042	17698507
ENSP00000276390	ENSG00000147416	ATP6V1B2	ATPase, H+ transporting, lysosomal 56/58kDa, V1 subunit B2 [Source:HGNC Symbol;Acc:HGNC:854]		0.15264187866927592	6	ENSP00000234396,ENSP00000405114,ENSP00000276390,ENSP00000430682,ENSP00000388353,ENSP00000408361	5	5	10	4.88516e-11	0.000460765	0.0172042	14856921
ENSP00000276590	ENSG00000147592	LACTB2	lactamase, beta 2 [Source:HGNC Symbol;Acc:HGNC:18512]		0.052083333333333336	2	ENSP00000428801,ENSP00000276590	1	1	1	0.000143678	0.000157101	0.00699383	539795
ENSP00000276692	ENSG00000147687	TATDN1	TatD DNase domain containing 1 [Source:HGNC Symbol;Acc:HGNC:24220]		0.1750841750841751	11	ENSP00000427807,ENSP00000430201,ENSP00000430274,ENSP00000428609,ENSP00000487380,ENSP00000430481,ENSP00000430756,ENSP00000276692,ENSP00000428336,ENSP00000428109,ENSP00000476180	5	5	16	7.61803e-13	0.000157101	0.00699383	1.06497e+09
ENSP00000276935	ENSG00000178031	ADAMTSL1	ADAMTS-like 1 [Source:HGNC Symbol;Acc:HGNC:14632]		0.10688140556368961	6	ENSP00000369921,ENSP00000401157,ENSP00000327887,ENSP00000369944,ENSP00000276935,ENSP00000369940	5	5	14	7.06657e-15	0.000157101	0.00699383	4.20739e+07
ENSP00000277480	ENSG00000148346	LCN2	lipocalin 2 [Source:HGNC Symbol;Acc:HGNC:6526]		0.30303030303030304	3	ENSP00000277480,ENSP00000362108,ENSP00000362089	4	4	20	0.00195817	0.00101792	0.0312306	132824319
ENSP00000277541	ENSG00000148400	NOTCH1	notch 1 [Source:HGNC Symbol;Acc:HGNC:7881]		0.09158512720156556	1	ENSP00000277541	11	11	114	1.76712e-63	0.000157101	0.00699383	2.84071e+08
ENSP00000277632	ENSG00000148481	FAM188A	family with sequence similarity 188, member A [Source:HGNC Symbol;Acc:HGNC:23578]		0.06741573033707865	4	ENSP00000277632,ENSP00000388661,ENSP00000367275,ENSP00000389883	2	2	7	5.08039e-05	0.000460765	0.0172042	8.38667e+06
ENSP00000277865	ENSG00000148672	GLUD1	glutamate dehydrogenase 1 [Source:HGNC Symbol;Acc:HGNC:4335]		0.12903225806451613	2	ENSP00000277865,ENSP00000327589	6	6	29	6.63964e-20	0.000157101	0.00699383	102797156
ENSP00000278407	ENSG00000149131	SERPING1	serpin peptidase inhibitor, clade G (C1 inhibitor), member 1 [Source:HGNC Symbol;Acc:HGNC:1228]		0.324	8	ENSP00000367574,ENSP00000384561,ENSP00000384420,ENSP00000367575,ENSP00000278407,ENSP00000341861,ENSP00000478572,ENSP00000399746	16	16	3337	1.69736e-62	0.000157101	0.00699383	1.60134e+10
ENSP00000278505	ENSG00000149218	ENDOD1	endonuclease domain containing 1 [Source:HGNC Symbol;Acc:HGNC:29129]		0.21	1	ENSP00000278505	6	6	40	3.77929e-30	0.000157101	0.00699383	3.50747e+08
ENSP00000278742	ENSG00000149418	ST14	suppression of tumorigenicity 14 (colon carcinoma) [Source:HGNC Symbol;Acc:HGNC:11344]		0.13801169590643275	1	ENSP00000278742	6	6	30	4.06093e-24	0.000157101	0.00699383	2.78721e+07
ENSP00000278968	ENSG00000149591	TAGLN	transgelin [Source:HGNC Symbol;Acc:HGNC:11553]		0.20398009950248755	7	ENSP00000431862,ENSP00000278968,ENSP00000431941,ENSP00000432054,ENSP00000376678,ENSP00000432380,ENSP00000432282	4	4	43	6.05067e-11	0.000157101	0.00699383	1.19584e+08
ENSP00000279022	ENSG00000101335	MYL9	myosin, light chain 9, regulatory [Source:HGNC Symbol;Acc:HGNC:15754]		0.4476744186046512	12	ENSP00000464464,ENSP00000217313,ENSP00000463614,ENSP00000237500,ENSP00000462171,ENSP00000217652,ENSP00000464359,ENSP00000463559,ENSP00000279022,ENSP00000441231,ENSP00000463009,ENSP00000383037	1	9	42	0.00162012	0.000460765	0.0172042	320036
ENSP00000279230	ENSG00000149782	PLCB3	phospholipase C, beta 3 (phosphatidylinositol-specific) [Source:HGNC Symbol;Acc:HGNC:9056]		0.05672609400324149	3	ENSP00000279230,ENSP00000324660,ENSP00000443631	6	6	27	1.04386e-15	0.000157101	0.00699383	46904260
ENSP00000279247	ENSG00000014216	CAPN1	calpain 1, (mu/I) large subunit [Source:HGNC Symbol;Acc:HGNC:1476]		0.21988795518207283	16	ENSP00000431172,ENSP00000436693,ENSP00000431984,ENSP00000435198,ENSP00000434176,ENSP00000431528,ENSP00000433823,ENSP00000435272,ENSP00000435847,ENSP00000433366,ENSP00000279247,ENSP00000435092,ENSP00000431686,ENSP00000431793,ENSP00000432512,ENSP00000436002	13	13	130	6.03906e-48	0.000157101	0.00699383	1.31884e+09
ENSP00000279441	ENSG00000166670	MMP10	matrix metallopeptidase 10 [Source:HGNC Symbol;Acc:HGNC:7156]		0.025210084033613446	1	ENSP00000279441	1	1	2	0.019607	0.00101792	0.0312306	NA
ENSP00000279463	ENSG00000149972	CNTN5	contactin 5 [Source:HGNC Symbol;Acc:HGNC:2175]		0.0959409594095941	9	ENSP00000380602,ENSP00000279463,ENSP00000436185,ENSP00000413642,ENSP00000433575,ENSP00000478120,ENSP00000435637,ENSP00000393229,ENSP00000396010	6	8	38	1.32316e-21	0.000157101	0.00699383	2.28785e+08
ENSP00000280481	ENSG00000150893	FREM2	FRAS1 related extracellular matrix protein 2 [Source:HGNC Symbol;Acc:HGNC:25396]		0.04701798674660776	1	ENSP00000280481	10	10	20	7.48122e-19	0.000157101	0.00699383	97803186
ENSP00000280527	ENSG00000150938	CRIM1	cysteine rich transmembrane BMP regulator 1 (chordin-like) [Source:HGNC Symbol;Acc:HGNC:2359]		0.05405405405405406	2	ENSP00000407636,ENSP00000280527	3	3	10	1.06704e-19	0.000157101	0.00699383	1.72706e+08
ENSP00000280800	ENSG00000151176	PLBD2	phospholipase B domain containing 2 [Source:HGNC Symbol;Acc:HGNC:27283]		0.11884550084889643	3	ENSP00000443463,ENSP00000280800,ENSP00000450343	5	5	12	1.51698e-16	0.000157101	0.00699383	2528325
ENSP00000280876	ENSG00000151233	GXYLT1	glucoside xylosyltransferase 1 [Source:HGNC Symbol;Acc:HGNC:27482]		0.022004889975550123	2	ENSP00000280876,ENSP00000381666	1	1	1	0.0673454	0.00495717	0.112156	3710853
ENSP00000281821	ENSG00000116106	EPHA4	EPH receptor A4 [Source:HGNC Symbol;Acc:HGNC:3388]		0.10851926977687627	6	ENSP00000410158,ENSP00000444085,ENSP00000404089,ENSP00000386276,ENSP00000386829,ENSP00000281821	8	8	67	1.46732e-32	0.000157101	0.00699383	59835122
ENSP00000281923	ENSG00000152127	MGAT5	mannosyl (alpha-1,6-)-glycoprotein beta-1,6-N-acetyl-glucosaminyltransferase [Source:HGNC Symbol;Acc:HGNC:7049]		0.18083670715249664	6	ENSP00000304355,ENSP00000406558,ENSP00000386675,ENSP00000386377,ENSP00000281923,ENSP00000386355	9	10	44	5.2784e-31	0.000157101	0.00699383	70031246
ENSP00000282091	ENSG00000152266	PTH	parathyroid hormone [Source:HGNC Symbol;Acc:HGNC:9606]		0.13043478260869565	2	ENSP00000433208,ENSP00000282091	1	1	1	2.73167e-05	0.000157101	0.00699383	3670024
ENSP00000282466	ENSG00000152580	IGSF10	immunoglobulin superfamily, member 10 [Source:HGNC Symbol;Acc:HGNC:26384]		0.013724742661075104	1	ENSP00000282466	2	2	4	0.0125999	0.00126687	0.0366317	2.41244e+08
ENSP00000282470	ENSG00000152583	SPARCL1	SPARC-like 1 (hevin) [Source:HGNC Symbol;Acc:HGNC:11220]		0.41566265060240964	8	ENSP00000414856,ENSP00000423483,ENSP00000416971,ENSP00000438188,ENSP00000444832,ENSP00000422903,ENSP00000423448,ENSP00000282470	19	19	337	3.48261e-89	0.000157101	0.00699383	2.65294e+09
ENSP00000282479	ENSG00000152592	DMP1	dentin matrix acidic phosphoprotein 1 [Source:HGNC Symbol;Acc:HGNC:2932]		0.13682092555331993	2	ENSP00000340935,ENSP00000282479	3	3	11	3.00911e-09	0.000157101	0.00699383	33183808
ENSP00000282588	ENSG00000213949	ITGA1	integrin, alpha 1 [Source:HGNC Symbol;Acc:HGNC:6134]		0.11620016963528414	1	ENSP00000282588	8	8	75	9.05236e-54	0.000157101	0.00699383	1.46276e+08
ENSP00000282957	ENSG00000153002	CPB1	carboxypeptidase B1 (tissue) [Source:HGNC Symbol;Acc:HGNC:2299]		0.2014388489208633	5	ENSP00000419114,ENSP00000417117,ENSP00000419427,ENSP00000417222,ENSP00000282957	8	8	44	1.1577e-25	0.000157101	0.00699383	1.31596e+08
ENSP00000283147	ENSG00000153162	BMP6	bone morphogenetic protein 6 [Source:HGNC Symbol;Acc:HGNC:1073]		0.025341130604288498	1	ENSP00000283147	1	1	7	0.000495929	0.000460765	0.0172042	3.20731e+08
ENSP00000283646	ENSG00000153574	RPIA	ribose 5-phosphate isomerase A [Source:HGNC Symbol;Acc:HGNC:10297]		0.10610932475884244	1	ENSP00000283646	2	2	4	3.64685e-06	0.000460765	0.0172042	NA
ENSP00000283752	ENSG00000057149	SERPINB3	serpin peptidase inhibitor, clade B (ovalbumin), member 3 [Source:HGNC Symbol;Acc:HGNC:10569]		0.09230769230769231	5	ENSP00000283752,ENSP00000348795,ENSP00000398645,ENSP00000329498,ENSP00000343445	2	2	2	6.68468e-08	0.000157101	0.00699383	831254
ENSP00000284136	ENSG00000153993	SEMA3D	sema domain, immunoglobulin domain (Ig), short basic domain, secreted, (semaphorin) 3D [Source:HGNC Symbol;Acc:HGNC:10726]		0.03088803088803089	2	ENSP00000284136,ENSP00000401366	2	2	4	4.68699e-07	0.000460765	0.0172042	4831013
ENSP00000284322	ENSG00000154175	ABI3BP	ABI family, member 3 (NESH) binding protein [Source:HGNC Symbol;Acc:HGNC:17265]		0.1283720930232558	8	ENSP00000418817,ENSP00000284322,ENSP00000420524,ENSP00000433993,ENSP00000435319,ENSP00000418479,ENSP00000436918,ENSP00000419029	11	11	159	3.66932e-61	0.000157101	0.00699383	5.376e+08
ENSP00000284719	ENSG00000138430	OLA1	Obg-like ATPase 1 [Source:HGNC Symbol;Acc:HGNC:28833]		0.4166666666666667	6	ENSP00000284719,ENSP00000414568,ENSP00000386350,ENSP00000404864,ENSP00000410385,ENSP00000340167	11	11	45	2.49567e-33	0.000157101	0.00699383	4.46436e+09
ENSP00000284767	ENSG00000154553	PDLIM3	PDZ and LIM domain 3 [Source:HGNC Symbol;Acc:HGNC:20767]		0.12318840579710146	4	ENSP00000284770,ENSP00000481771,ENSP00000284767,ENSP00000284771	2	2	3	2.16367e-05	0.000460765	0.0172042	56979961
ENSP00000284894	ENSG00000154654	NCAM2	neural cell adhesion molecule 2 [Source:HGNC Symbol;Acc:HGNC:7657]		0.25518925518925517	5	ENSP00000383392,ENSP00000348132,ENSP00000284894,ENSP00000411852,ENSP00000346660	21	21	172	6.1923e-56	0.000157101	0.00699383	735995584
ENSP00000284984	ENSG00000154734	ADAMTS1	ADAM metallopeptidase with thrombospondin type 1 motif, 1 [Source:HGNC Symbol;Acc:HGNC:217]		0.07549120992761117	1	ENSP00000284984	3	3	23	6.51516e-22	0.000157101	0.00699383	260016596
ENSP00000284987	ENSG00000154736	ADAMTS5	ADAM metallopeptidase with thrombospondin type 1 motif, 5 [Source:HGNC Symbol;Acc:HGNC:221]		0.01935483870967742	1	ENSP00000284987	2	2	4	0.00131574	0.000460765	0.0172042	8.45218e+06
ENSP00000285379	ENSG00000104267	CA2	carbonic anhydrase II [Source:HGNC Symbol;Acc:HGNC:1373]		0.3	3	ENSP00000285379,ENSP00000428947,ENSP00000428443	12	12	551	1.52308e-60	0.000157101	0.00699383	11649177088
ENSP00000285381	ENSG00000164879	CA3	carbonic anhydrase III [Source:HGNC Symbol;Acc:HGNC:1374]		0.14615384615384616	1	ENSP00000285381	5	5	22	7.57664e-15	0.000157101	0.00699383	1.30844e+07
ENSP00000285667	ENSG00000155304	HSPA13	heat shock protein 70kDa family, member 13 [Source:HGNC Symbol;Acc:HGNC:11375]		0.21443736730360935	1	ENSP00000285667	6	6	49	7.74573e-26	0.000157101	0.00699383	1.37028e+08
ENSP00000285930	ENSG00000085662	AKR1B1	aldo-keto reductase family 1, member B1 (aldose reductase) [Source:HGNC Symbol;Acc:HGNC:381]		0.060126582278481014	2	ENSP00000414399,ENSP00000285930	2	2	2	0.00642163	0.00126687	0.0366317	15443035
ENSP00000286091	ENSG00000155660	PDIA4	protein disulfide isomerase family A, member 4 [Source:HGNC Symbol;Acc:HGNC:30167]		0.2434108527131783	1	ENSP00000286091	14	14	90	1.25487e-53	0.000157101	0.00699383	891847512
ENSP00000286371	ENSG00000069849	ATP1B3	ATPase, Na+/K+ transporting, beta 3 polypeptide [Source:HGNC Symbol;Acc:HGNC:806]		0.12186379928315412	3	ENSP00000417522,ENSP00000419962,ENSP00000286371	2	2	5	7.83219e-07	0.000157101	0.00699383	8277090
ENSP00000287143	ENSG00000156575	PRG3	proteoglycan 3 [Source:HGNC Symbol;Acc:HGNC:9363]		0.18222222222222223	1	ENSP00000287143	2	2	9	1.92026e-07	0.000460765	0.0172042	29236953
ENSP00000287497	ENSG00000169896	ITGAM	integrin, alpha M (complement component 3 receptor 3 subunit) [Source:HGNC Symbol;Acc:HGNC:6149]		0.11458333333333333	4	ENSP00000441691,ENSP00000287497,ENSP00000268296,ENSP00000454623	10	10	27	1.44601e-39	0.000157101	0.00699383	9.7951e+06
ENSP00000288266	ENSG00000157500	APPL1	adaptor protein, phosphotyrosine interaction, PH domain and leucine zipper containing 1 [Source:HGNC Symbol;Acc:HGNC:24035]		0.05077574047954866	2	ENSP00000288266,ENSP00000406095	2	2	5	3.49417e-09	0.000157101	0.00699383	17337498
ENSP00000289175	ENSG00000124831	LRRFIP1	leucine rich repeat (in FLII) interacting protein 1 [Source:HGNC Symbol;Acc:HGNC:6702]		0.15558510638297873	4	ENSP00000244815,ENSP00000375857,ENSP00000409431,ENSP00000289175	8	8	22	2.22287e-35	0.000157101	0.00699383	40401392
ENSP00000289228	ENSG00000115073	ACTR1B	ARP1 actin-related protein 1 homolog B, centractin beta (yeast) [Source:HGNC Symbol;Acc:HGNC:168]		0.0398936170212766	1	ENSP00000289228	1	1	2	0.000377606	0.000460765	0.0172042	45891044
ENSP00000289734	ENSG00000029534	ANK1	ankyrin 1, erythrocytic [Source:HGNC Symbol;Acc:HGNC:492]		0.10425531914893617	5	ENSP00000339620,ENSP00000289734,ENSP00000430174,ENSP00000428315,ENSP00000265709	14	14	56	2.46999e-46	0.000157101	0.00699383	5.84273e+09
ENSP00000289746	ENSG00000129910	CDH15	cadherin 15, type 1, M-cadherin (myotubule) [Source:HGNC Symbol;Acc:HGNC:1754]		0.07493857493857493	1	ENSP00000289746	4	4	29	1.47034e-22	0.000157101	0.00699383	87751876
ENSP00000290039	ENSG00000158966	CACHD1	cache domain containing 1 [Source:HGNC Symbol;Acc:HGNC:29314]		0.08176614881439084	1	ENSP00000290039	6	6	17	1.24261e-10	0.000157101	0.00699383	1684269740
ENSP00000290541	ENSG00000159377	PSMB4	proteasome (prosome, macropain) subunit, beta type, 4 [Source:HGNC Symbol;Acc:HGNC:9541]		0.23484848484848486	1	ENSP00000290541	5	5	34	3.0028e-37	0.000157101	0.00699383	4.01298e+07
ENSP00000290866	ENSG00000159640	ACE	angiotensin I converting enzyme [Source:HGNC Symbol;Acc:HGNC:2707]		0.17917304747320062	13	ENSP00000387760,ENSP00000290866,ENSP00000392247,ENSP00000462002,ENSP00000462280,ENSP00000462995,ENSP00000397593,ENSP00000464149,ENSP00000462909,ENSP00000464428,ENSP00000290863,ENSP00000462599,ENSP00000463673	18	18	233	1.46591e-71	0.000157101	0.00699383	3.20498e+09
ENSP00000290868	ENSG00000159650	UROC1	urocanate hydratase 1 [Source:HGNC Symbol;Acc:HGNC:26444]		0.038461538461538464	2	ENSP00000290868,ENSP00000373073	3	3	6	5.37381e-05	0.00101792	0.0312306	5.67997e+07
ENSP00000290942	ENSG00000159713	TPPP3	tubulin polymerization-promoting protein family member 3 [Source:HGNC Symbol;Acc:HGNC:24162]		0.1534090909090909	4	ENSP00000290942,ENSP00000462435,ENSP00000377529,ENSP00000457275	2	2	14	2.02633e-08	0.000157101	0.00699383	1.04695e+07
ENSP00000291009	ENSG00000159763	PIP	prolactin-induced protein [Source:HGNC Symbol;Acc:HGNC:8993]		0.3287671232876712	1	ENSP00000291009	3	3	16	3.82622e-09	0.000157101	0.00699383	7.60098e+07
ENSP00000291495	ENSG00000160161	CILP2	cartilage intermediate layer protein 2 [Source:HGNC Symbol;Acc:HGNC:24213]		0.10121107266435986	2	ENSP00000291495,ENSP00000467413	9	9	51	7.62704e-36	0.000157101	0.00699383	9.03939e+08
ENSP00000291526	ENSG00000160181	TFF2	trefoil factor 2 [Source:HGNC Symbol;Acc:HGNC:11756]		0.10852713178294573	1	ENSP00000291526	3	3	11	1.43418e-13	0.000157101	0.00699383	8444179
ENSP00000291527	ENSG00000160182	TFF1	trefoil factor 1 [Source:HGNC Symbol;Acc:HGNC:11755]		0.10714285714285714	1	ENSP00000291527	1	1	18	0.0124436	0.00101792	0.0312306	59941266
ENSP00000291700	ENSG00000160307	S100B	S100 calcium binding protein B [Source:HGNC Symbol;Acc:HGNC:10500]		0.2391304347826087	2	ENSP00000291700,ENSP00000380769	2	2	7	2.48339e-10	0.000157101	0.00699383	11091396
ENSP00000291726	ENSG00000129455	KLK8	kallikrein-related peptidase 8 [Source:HGNC Symbol;Acc:HGNC:6369]		0.09352517985611511	3	ENSP00000472016,ENSP00000375682,ENSP00000291726	1	1	5	1.41663e-05	0.000157101	0.00699383	5572165
ENSP00000291744	ENSG00000160339	FCN2	ficolin (collagen/fibrinogen domain containing lectin) 2 [Source:HGNC Symbol;Acc:HGNC:3624]		0.19808306709265175	3	ENSP00000291744,ENSP00000291741,ENSP00000360871	4	5	38	4.2824e-16	0.000157101	0.00699383	2.95981e+08
ENSP00000292169	ENSG00000160678	S100A1	S100 calcium binding protein A1 [Source:HGNC Symbol;Acc:HGNC:10486]		0.1595744680851064	2	ENSP00000357687,ENSP00000292169	1	1	2	1.70595e-05	0.000157101	0.00699383	166556
ENSP00000292327	ENSG00000160808	MYL3	myosin, light chain 3, alkali; ventricular, skeletal, slow [Source:HGNC Symbol;Acc:HGNC:7584]		0.06153846153846154	2	ENSP00000292327,ENSP00000379210	1	1	2	0.00192736	0.000460765	0.0172042	NA
ENSP00000292357	ENSG00000187800	PEAR1	platelet endothelial aggregation receptor 1 [Source:HGNC Symbol;Acc:HGNC:33631]		0.08389585342333655	2	ENSP00000292357,ENSP00000344465	5	5	39	6.47648e-28	0.000157101	0.00699383	6.63572e+07
ENSP00000292401	ENSG00000160862	AZGP1	alpha-2-glycoprotein 1, zinc-binding [Source:HGNC Symbol;Acc:HGNC:910]		0.6510067114093959	3	ENSP00000292401,ENSP00000396093,ENSP00000389942	28	28	4641	4.95357e-127	0.000157101	0.00699383	18403686400
ENSP00000292432	ENSG00000160883	HK3	hexokinase 3 (white cell) [Source:HGNC Symbol;Acc:HGNC:4925]		0.13326110509209102	4	ENSP00000292432,ENSP00000424632,ENSP00000290573,ENSP00000387140	6	7	40	8.98153e-20	0.000157101	0.00699383	2.2308e+09
ENSP00000292591	ENSG00000161013	MGAT4B	mannosyl (alpha-1,3-)-glycoprotein beta-1,4-N-acetylglucosaminyltransferase, isozyme B [Source:HGNC Symbol;Acc:HGNC:7048]		0.04927007299270073	6	ENSP00000428906,ENSP00000292591,ENSP00000428960,ENSP00000430964,ENSP00000338487,ENSP00000430723	2	2	7	1.02582e-06	0.000157101	0.00699383	5.69177e+07
ENSP00000292609	ENSG00000161031	PGLYRP2	peptidoglycan recognition protein 2 [Source:HGNC Symbol;Acc:HGNC:30013]		0.42586750788643535	3	ENSP00000292609,ENSP00000472856,ENSP00000345968	22	22	1850	1.3897e-143	0.000157101	0.00699383	12400933888
ENSP00000292644	ENSG00000161057	PSMC2	proteasome (prosome, macropain) 26S subunit, ATPase, 2 [Source:HGNC Symbol;Acc:HGNC:9548]		0.3279445727482679	4	ENSP00000401724,ENSP00000391211,ENSP00000393027,ENSP00000292644	11	11	33	1.43121e-31	0.000157101	0.00699383	1.48747e+08
ENSP00000292901	ENSG00000223609	HBD	hemoglobin, delta [Source:HGNC Symbol;Acc:HGNC:4829]		0.49645390070921985	5	ENSP00000292901,ENSP00000333994,ENSP00000369671,ENSP00000393810,ENSP00000369654	3	5	49	1.29671e-13	0.000157101	0.00699383	1.15732e+08
ENSP00000293371	ENSG00000161634	DCD	dermcidin [Source:HGNC Symbol;Acc:HGNC:14669]		0.22727272727272727	2	ENSP00000293371,ENSP00000406773	2	2	15	8.74625e-06	0.000460765	0.0172042	2655762
ENSP00000293379	ENSG00000161638	ITGA5	integrin, alpha 5 (fibronectin receptor, alpha polypeptide) [Source:HGNC Symbol;Acc:HGNC:6141]		0.03813155386081983	1	ENSP00000293379	2	2	7	7.46499e-10	0.000157101	0.00699383	5.37983e+07
ENSP00000293525	ENSG00000170442	KRT86	keratin 86, type II [Source:HGNC Symbol;Acc:HGNC:6463]		0.08641975308641975	8	ENSP00000293525,ENSP00000369349,ENSP00000483796,ENSP00000440240,ENSP00000452237,ENSP00000293670,ENSP00000257901,ENSP00000444533	2	4	17	5.64942e-07	0.000157101	0.00699383	1.00108e+08
ENSP00000293670	ENSG00000170523	KRT83	keratin 83, type II [Source:HGNC Symbol;Acc:HGNC:6460]		0.04462474645030426	8	ENSP00000293525,ENSP00000369349,ENSP00000483796,ENSP00000440240,ENSP00000452237,ENSP00000293670,ENSP00000257901,ENSP00000444533	1	3	14	0.0970594	0.00912014	0.185002	8.54523e+06
ENSP00000293831	ENSG00000161960	EIF4A1	eukaryotic translation initiation factor 4A1 [Source:HGNC Symbol;Acc:HGNC:3282]		0.1921182266009852	15	ENSP00000413529,ENSP00000463067,ENSP00000463366,ENSP00000464066,ENSP00000463486,ENSP00000462753,ENSP00000293831,ENSP00000398370,ENSP00000462275,ENSP00000464550,ENSP00000462904,ENSP00000463380,ENSP00000463634,ENSP00000326381,ENSP00000462719	5	7	26	4.26536e-11	0.000157101	0.00699383	3272709
ENSP00000293971	ENSG00000162066	AMDHD2	amidohydrolase domain containing 2 [Source:HGNC Symbol;Acc:HGNC:24262]		0.08068459657701711	7	ENSP00000456898,ENSP00000391596,ENSP00000307481,ENSP00000455561,ENSP00000457136,ENSP00000457398,ENSP00000293971	2	2	6	1.26939e-10	0.000157101	0.00699383	14892599
ENSP00000294360	ENSG00000162384	C1orf123	chromosome 1 open reading frame 123 [Source:HGNC Symbol;Acc:HGNC:26059]		0.14375	1	ENSP00000294360	1	1	8	6.79878e-11	0.000157101	0.00699383	2.5188e+07
ENSP00000294599	ENSG00000162591	MEGF6	multiple EGF-like-domains 6 [Source:HGNC Symbol;Acc:HGNC:3232]		0.08624898291293735	3	ENSP00000294599,ENSP00000419033,ENSP00000348982	6	6	9	1.27414e-18	0.000157101	0.00699383	5.32593e+06
ENSP00000294728	ENSG00000162692	VCAM1	vascular cell adhesion molecule 1 [Source:HGNC Symbol;Acc:HGNC:12663]		0.4952638700947226	6	ENSP00000355922,ENSP00000359133,ENSP00000359137,ENSP00000304611,ENSP00000294728,ENSP00000478221	33	34	1066	4.51626e-170	0.000157101	0.00699383	15121048576
ENSP00000294964	ENSG00000162878	PKDCC	protein kinase domain containing, cytoplasmic [Source:HGNC Symbol;Acc:HGNC:25123]		0.08924949290060852	1	ENSP00000294964	4	4	24	4.52391e-14	0.000157101	0.00699383	1.27851e+07
ENSP00000295006	ENSG00000162909	CAPN2	calpain 2, (m/II) large subunit [Source:HGNC Symbol;Acc:HGNC:1479]		0.26857142857142857	2	ENSP00000413158,ENSP00000295006	12	12	43	2.58907e-43	0.000157101	0.00699383	7423186048
ENSP00000295228	ENSG00000163083	INHBB	inhibin, beta B [Source:HGNC Symbol;Acc:HGNC:6067]		0.15724815724815724	1	ENSP00000295228	4	4	11	1.03697e-15	0.000157101	0.00699383	1.66283e+08
ENSP00000295256	ENSG00000163106	HPGDS	hematopoietic prostaglandin D synthase [Source:HGNC Symbol;Acc:HGNC:17890]		0.18090452261306533	1	ENSP00000295256	2	2	21	2.55453e-11	0.000157101	0.00699383	54780782
ENSP00000295379	ENSG00000163217	BMP10	bone morphogenetic protein 10 [Source:HGNC Symbol;Acc:HGNC:20869]		0.13443396226415094	1	ENSP00000295379	6	6	34	6.34851e-14	0.000157101	0.00699383	1.00834e+08
ENSP00000295440	ENSG00000163273	NPPC	natriuretic peptide C [Source:HGNC Symbol;Acc:HGNC:7941]		0.14285714285714285	2	ENSP00000295440,ENSP00000387159	1	1	4	3.02378e-07	0.000157101	0.00699383	910760
ENSP00000295550	ENSG00000163359	COL6A3	collagen, type VI, alpha 3 [Source:HGNC Symbol;Acc:HGNC:2213]		0.31916902738432484	9	ENSP00000386844,ENSP00000375860,ENSP00000418285,ENSP00000460277,ENSP00000315873,ENSP00000315609,ENSP00000295550,ENSP00000389539,ENSP00000375861	73	73	1168	0	0.000157101	0.00699383	2.22525e+10
ENSP00000295633	ENSG00000163430	FSTL1	follistatin-like 1 [Source:HGNC Symbol;Acc:HGNC:3972]		0.22727272727272727	3	ENSP00000394355,ENSP00000295633,ENSP00000418505	6	6	24	1.22866e-16	0.000460765	0.0172042	1.3805e+09
ENSP00000295640	ENSG00000176393	RNPEP	arginyl aminopeptidase (aminopeptidase B) [Source:HGNC Symbol;Acc:HGNC:10078]		0.13538461538461538	6	ENSP00000478325,ENSP00000407614,ENSP00000295640,ENSP00000389602,ENSP00000356255,ENSP00000478884	7	7	34	2.45487e-27	0.000157101	0.00699383	1.44973e+08
ENSP00000295685	ENSG00000163466	ARPC2	actin related protein 2/3 complex, subunit 2, 34kDa [Source:HGNC Symbol;Acc:HGNC:705]		0.27	5	ENSP00000295685,ENSP00000327137,ENSP00000396475,ENSP00000401070,ENSP00000411612	4	4	14	2.01755e-12	0.000157101	0.00699383	4.81942e+07
ENSP00000295731	ENSG00000163501	IHH	indian hedgehog [Source:HGNC Symbol;Acc:HGNC:5956]		0.12408759124087591	1	ENSP00000295731	3	3	10	6.94913e-13	0.000157101	0.00699383	15372488
ENSP00000295754	ENSG00000163513	TGFBR2	transforming growth factor, beta receptor II (70/80kDa) [Source:HGNC Symbol;Acc:HGNC:11773]		0.02821869488536155	1	ENSP00000295754	2	2	11	1.3824e-07	0.000460765	0.0172042	4.61993e+07
ENSP00000295760	ENSG00000163520	FBLN2	fibulin 2 [Source:HGNC Symbol;Acc:HGNC:3601]		0.21030405405405406	5	ENSP00000295760,ENSP00000384169,ENSP00000420042,ENSP00000420164,ENSP00000295761	14	14	47	2.84508e-60	0.000157101	0.00699383	844033656
ENSP00000295777	ENSG00000163536	SERPINI1	serpin peptidase inhibitor, clade I (neuroserpin), member 1 [Source:HGNC Symbol;Acc:HGNC:8943]		0.07804878048780488	5	ENSP00000420807,ENSP00000295777,ENSP00000420561,ENSP00000397373,ENSP00000420133	3	3	8	7.82305e-09	0.000157101	0.00699383	2.61372e+09
ENSP00000295834	ENSG00000163586	FABP1	fatty acid binding protein 1, liver [Source:HGNC Symbol;Acc:HGNC:3555]		0.41732283464566927	2	ENSP00000295834,ENSP00000377351	3	3	17	5.03455e-12	0.000157101	0.00699383	7.6174e+07
ENSP00000295897	ENSG00000163631	ALB	albumin [Source:HGNC Symbol;Acc:HGNC:399]		0.7832512315270936	9	ENSP00000401820,ENSP00000426179,ENSP00000421027,ENSP00000384695,ENSP00000480485,ENSP00000392541,ENSP00000295897,ENSP00000483421,ENSP00000422784	5	88	5457	8.15963e-33	0.000157101	0.00699383	2.58263e+09
ENSP00000295901	ENSG00000163636	PSMD6	proteasome (prosome, macropain) 26S subunit, non-ATPase, 6 [Source:HGNC Symbol;Acc:HGNC:9564]		0.09768637532133675	6	ENSP00000418887,ENSP00000418303,ENSP00000377952,ENSP00000419227,ENSP00000295901,ENSP00000418695	4	4	16	5.9759e-13	0.000157101	0.00699383	286932583
ENSP00000295927	ENSG00000163661	PTX3	pentraxin 3, long [Source:HGNC Symbol;Acc:HGNC:9692]		0.06299212598425197	1	ENSP00000295927	2	2	9	5.69931e-06	0.000460765	0.0172042	9.91008e+08
ENSP00000296028	ENSG00000163736	PPBP	pro-platelet basic protein (chemokine (C-X-C motif) ligand 7) [Source:HGNC Symbol;Acc:HGNC:9240]		0.1875	1	ENSP00000296028	3	3	420	5.02152e-10	0.000157101	0.00699383	1.23436e+09
ENSP00000296048	ENSG00000163754	GYG1	glycogenin 1 [Source:HGNC Symbol;Acc:HGNC:4699]		0.10810810810810811	1	ENSP00000296048	1	1	1	4.39322e-06	0.000157101	0.00699383	334678
ENSP00000296181	ENSG00000082781	ITGB5	integrin, beta 5 [Source:HGNC Symbol;Acc:HGNC:6160]		0.1214017521902378	6	ENSP00000420814,ENSP00000418367,ENSP00000477230,ENSP00000419198,ENSP00000477446,ENSP00000296181	4	4	7	5.57801e-11	0.000157101	0.00699383	111914743
ENSP00000296255	ENSG00000163902	RPN1	ribophorin I [Source:HGNC Symbol;Acc:HGNC:10381]		0.10378912685337727	3	ENSP00000296255,ENSP00000417529,ENSP00000419384	4	4	6	1.04477e-06	0.00101792	0.0312306	1.19465e+06
ENSP00000296280	ENSG00000127241	MASP1	mannan-binding lectin serine peptidase 1 (C4/C2 activating component of Ra-reactive factor) [Source:HGNC Symbol;Acc:HGNC:6901]		0.3241758241758242	14	ENSP00000484657,ENSP00000354057,ENSP00000169293,ENSP00000336792,ENSP00000376262,ENSP00000397921,ENSP00000296280,ENSP00000409047,ENSP00000412021,ENSP00000376264,ENSP00000384464,ENSP00000385035,ENSP00000328173,ENSP00000376267	5	29	1220	2.04049e-36	0.000157101	0.00699383	5.18336e+08
ENSP00000296289	ENSG00000163931	TKT	transketolase [Source:HGNC Symbol;Acc:HGNC:11834]		0.24726477024070023	5	ENSP00000296289,ENSP00000417773,ENSP00000405455,ENSP00000391481,ENSP00000418340	7	7	155	2.38057e-31	0.000157101	0.00699383	8856667008
ENSP00000296350	ENSG00000163975	MFI2	antigen p97 (melanoma associated) identified by monoclonal antibodies 133.2 and 96.5 [Source:HGNC Symbol;Acc:HGNC:7037]		0.16395663956639567	3	ENSP00000393439,ENSP00000296350,ENSP00000296351	7	7	35	2.78059e-31	0.000157101	0.00699383	729543318
ENSP00000296412	ENSG00000197894	ADH5	alcohol dehydrogenase 5 (class III), chi polypeptide [Source:HGNC Symbol;Acc:HGNC:253]		0.22994652406417113	4	ENSP00000296412,ENSP00000422119,ENSP00000421556,ENSP00000427049	4	4	42	1.70997e-18	0.000157101	0.00699383	7.91247e+09
ENSP00000296435	ENSG00000164047	CAMP	cathelicidin antimicrobial peptide [Source:HGNC Symbol;Acc:HGNC:1472]		0.2832369942196532	1	ENSP00000296435	6	6	41	1.35547e-22	0.000157101	0.00699383	103760240
ENSP00000296456	ENSG00000164062	APEH	acylaminoacyl-peptide hydrolase [Source:HGNC Symbol;Acc:HGNC:586]		0.17349726775956284	6	ENSP00000296456,ENSP00000415862,ENSP00000414369,ENSP00000410366,ENSP00000402365,ENSP00000401871	7	7	26	1.07962e-32	0.000157101	0.00699383	6.3432e+07
ENSP00000296511	ENSG00000164111	ANXA5	annexin A5 [Source:HGNC Symbol;Acc:HGNC:543]		0.275	5	ENSP00000424199,ENSP00000427135,ENSP00000296511,ENSP00000421421,ENSP00000424106	7	7	48	1.07538e-24	0.000157101	0.00699383	2.67646e+08
ENSP00000296585	ENSG00000164171	ITGA2	integrin, alpha 2 (CD49B, alpha 2 subunit of VLA-2 receptor) [Source:HGNC Symbol;Acc:HGNC:6137]		0.12955122777307368	5	ENSP00000424397,ENSP00000422145,ENSP00000424642,ENSP00000296585,ENSP00000426489	8	8	52	2.96377e-42	0.000157101	0.00699383	9.09998e+07
ENSP00000296658	ENSG00000164237	CMBL	carboxymethylenebutenolidase homolog (Pseudomonas) [Source:HGNC Symbol;Acc:HGNC:25090]		0.09795918367346938	1	ENSP00000296658	2	2	6	2.32959e-06	0.000157101	0.00699383	4.74047e+06
ENSP00000296694	ENSG00000164265	SCGB3A2	secretoglobin, family 3A, member 2 [Source:HGNC Symbol;Acc:HGNC:18391]		0.1827956989247312	1	ENSP00000296694	1	1	1	0.00768589	0.00101792	0.0312306	5783089
ENSP00000296695	ENSG00000164266	SPINK1	serine peptidase inhibitor, Kazal type 1 [Source:HGNC Symbol;Acc:HGNC:11244]		0.4430379746835443	2	ENSP00000427376,ENSP00000296695	3	3	10	8.66847e-14	0.000157101	0.00699383	2.13701e+07
ENSP00000296741	ENSG00000164303	ENPP6	ectonucleotide pyrophosphatase/phosphodiesterase 6 [Source:HGNC Symbol;Acc:HGNC:23409]		0.03636363636363636	1	ENSP00000296741	1	1	2	5.85229e-05	0.000157101	0.00699383	2079807
ENSP00000296861	ENSG00000146072	TNFRSF21	tumor necrosis factor receptor superfamily, member 21 [Source:HGNC Symbol;Acc:HGNC:13469]		0.0183206106870229	1	ENSP00000296861	1	1	1	0.00471015	0.000460765	0.0172042	1588638
ENSP00000296932	ENSG00000112414	ADGRG6	adhesion G protein-coupled receptor G6 [Source:HGNC Symbol;Acc:HGNC:13841]		0.04777870913663034	6	ENSP00000439371,ENSP00000444123,ENSP00000296932,ENSP00000230173,ENSP00000356580,ENSP00000356581	5	5	76	4.10277e-14	0.000157101	0.00699383	8555814392
ENSP00000296955	ENSG00000164465	DCBLD1	discoidin, CUB and LCCL domain containing 1 [Source:HGNC Symbol;Acc:HGNC:21479]		0.061224489795918366	3	ENSP00000391700,ENSP00000296955,ENSP00000342422	3	3	17	7.96787e-05	0.000460765	0.0172042	6.98191e+06
ENSP00000297258	ENSG00000164687	FABP5	fatty acid binding protein 5 (psoriasis-associated) [Source:HGNC Symbol;Acc:HGNC:3560]		0.2222222222222222	2	ENSP00000297258,ENSP00000379647	4	4	5	1.12575e-05	0.00101792	0.0312306	5.88065e+06
ENSP00000297261	ENSG00000164690	SHH	sonic hedgehog [Source:HGNC Symbol;Acc:HGNC:10848]		0.0367965367965368	1	ENSP00000297261	2	2	6	2.74486e-08	0.000157101	0.00699383	1.49779e+07
ENSP00000297283	ENSG00000164708	PGAM2	phosphoglycerate mutase 2 (muscle) [Source:HGNC Symbol;Acc:HGNC:8889]		0.2490118577075099	2	ENSP00000359991,ENSP00000297283	4	5	25	2.05084e-17	0.000157101	0.00699383	1.13106e+07
ENSP00000297350	ENSG00000164761	TNFRSF11B	tumor necrosis factor receptor superfamily, member 11b [Source:HGNC Symbol;Acc:HGNC:11909]		0.034912718204488775	1	ENSP00000297350	1	1	1	0.000839769	0.000460765	0.0172042	82283400
ENSP00000297354	ENSG00000164764	SBSPON	somatomedin B and thrombospondin, type 1 domain containing [Source:HGNC Symbol;Acc:HGNC:30362]		0.11363636363636363	1	ENSP00000297354	2	2	2	0.0106799	0.00101792	0.0312306	360284
ENSP00000297450	ENSG00000154188	ANGPT1	angiopoietin 1 [Source:HGNC Symbol;Acc:HGNC:484]		0.05432595573440644	2	ENSP00000428340,ENSP00000297450	2	2	4	8.10152e-07	0.000157101	0.00699383	5095165
ENSP00000297785	ENSG00000165092	ALDH1A1	aldehyde dehydrogenase 1 family, member A1 [Source:HGNC Symbol;Acc:HGNC:402]		0.3033932135728543	6	ENSP00000297785,ENSP00000450353,ENSP00000388026,ENSP00000261733,ENSP00000401361,ENSP00000366138	13	13	122	3.89304e-49	0.000157101	0.00699383	1.25225e+09
ENSP00000297904	ENSG00000165197	FIGF	c-fos induced growth factor (vascular endothelial growth factor D) [Source:HGNC Symbol;Acc:HGNC:3708]		0.11581920903954802	1	ENSP00000297904	4	4	20	2.17949e-08	0.000460765	0.0172042	2.01739e+07
ENSP00000298198	ENSG00000165434	PGM2L1	phosphoglucomutase 2-like 1 [Source:HGNC Symbol;Acc:HGNC:20898]		0.12057877813504823	1	ENSP00000298198	6	6	19	7.44269e-15	0.000157101	0.00699383	66917649
ENSP00000298510	ENSG00000165672	PRDX3	peroxiredoxin 3 [Source:HGNC Symbol;Acc:HGNC:9354]		0.0859375	1	ENSP00000298510	2	2	4	9.25925e-05	0.000157101	0.00699383	4260620
ENSP00000298556	ENSG00000165704	HPRT1	hypoxanthine phosphoribosyltransferase 1 [Source:HGNC Symbol;Acc:HGNC:5157]		0.42201834862385323	1	ENSP00000298556	6	6	75	1.03921e-27	0.000157101	0.00699383	4.26912e+08
ENSP00000298743	ENSG00000180447	GAS1	growth arrest-specific 1 [Source:HGNC Symbol;Acc:HGNC:4165]		0.23478260869565218	1	ENSP00000298743	4	4	9	1.72965e-20	0.000157101	0.00699383	4607196
ENSP00000298841	ENSG00000100665	SERPINA4	serpin peptidase inhibitor, clade A (alpha-1 antiproteinase, antitrypsin), member 4 [Source:HGNC Symbol;Acc:HGNC:8948]		0.36533957845433257	3	ENSP00000451172,ENSP00000450838,ENSP00000298841	15	15	749	4.75582e-56	0.000157101	0.00699383	8995603968
ENSP00000299022	ENSG00000166035	LIPC	lipase, hepatic [Source:HGNC Symbol;Acc:HGNC:6619]		0.15831663326653306	4	ENSP00000395569,ENSP00000299022,ENSP00000348425,ENSP00000395002	6	6	34	8.64584e-31	0.000157101	0.00699383	25033155
ENSP00000299138	ENSG00000069329	VPS35	vacuolar protein sorting 35 homolog (S. cerevisiae) [Source:HGNC Symbol;Acc:HGNC:13487]		0.10050251256281408	3	ENSP00000461469,ENSP00000461423,ENSP00000299138	6	6	13	1.28797e-14	0.000157101	0.00699383	159268205
ENSP00000299198	ENSG00000166165	CKB	creatine kinase, brain [Source:HGNC Symbol;Acc:HGNC:1991]		0.28346456692913385	15	ENSP00000404203,ENSP00000406577,ENSP00000300283,ENSP00000451904,ENSP00000221476,ENSP00000410289,ENSP00000451426,ENSP00000413165,ENSP00000254035,ENSP00000486477,ENSP00000413255,ENSP00000451680,ENSP00000299198,ENSP00000416717,ENSP00000487331	6	7	10	6.74996e-21	0.000157101	0.00699383	4.19128e+06
ENSP00000299314	ENSG00000111670	GNPTAB	N-acetylglucosamine-1-phosphate transferase, alpha and beta subunits [Source:HGNC Symbol;Acc:HGNC:29670]		0.08598726114649681	3	ENSP00000449150,ENSP00000449217,ENSP00000299314	7	7	25	5.25039e-32	0.000157101	0.00699383	6.13316e+09
ENSP00000299427	ENSG00000166340	TPP1	tripeptidyl peptidase I [Source:HGNC Symbol;Acc:HGNC:2073]		0.152753108348135	4	ENSP00000437066,ENSP00000398136,ENSP00000484546,ENSP00000299427	4	4	28	3.37951e-19	0.000157101	0.00699383	14727415
ENSP00000299441	ENSG00000166341	DCHS1	dachsous cadherin-related 1 [Source:HGNC Symbol;Acc:HGNC:13681]		0.10885385081867799	1	ENSP00000299441	21	21	106	6.57512e-112	0.000157101	0.00699383	2.03684e+08
ENSP00000299502	ENSG00000197632	SERPINB2	serpin peptidase inhibitor, clade B (ovalbumin), member 2 [Source:HGNC Symbol;Acc:HGNC:8584]		0.344578313253012	7	ENSP00000401645,ENSP00000397096,ENSP00000392381,ENSP00000381082,ENSP00000402386,ENSP00000299502,ENSP00000385397	13	13	45	2.40303e-54	0.000157101	0.00699383	7.99275e+08
ENSP00000299641	ENSG00000166507	NDST2	N-deacetylase/N-sulfotransferase (heparan glucosaminyl) 2 [Source:HGNC Symbol;Acc:HGNC:7681]		0.06002265005662514	4	ENSP00000475031,ENSP00000392733,ENSP00000299641,ENSP00000310657	4	4	8	6.39667e-18	0.000157101	0.00699383	12080246
ENSP00000299698	ENSG00000166535	A2ML1	alpha-2-macroglobulin-like 1 [Source:HGNC Symbol;Acc:HGNC:23336]		0.05983493810178817	3	ENSP00000438292,ENSP00000443174,ENSP00000299698	7	7	15	7.40906e-19	0.000157101	0.00699383	1.76527e+07
ENSP00000299767	ENSG00000166598	HSP90B1	heat shock protein 90kDa beta (Grp94), member 1 [Source:HGNC Symbol;Acc:HGNC:12028]		0.398505603985056	9	ENSP00000477660,ENSP00000446266,ENSP00000481908,ENSP00000360709,ENSP00000450215,ENSP00000360609,ENSP00000299767,ENSP00000446748,ENSP00000325875	39	41	593	7.38491e-178	0.000157101	0.00699383	5.46698e+09
ENSP00000299855	ENSG00000149968	MMP3	matrix metallopeptidase 3 [Source:HGNC Symbol;Acc:HGNC:7173]		0.14465408805031446	2	ENSP00000299855,ENSP00000398346	7	7	36	1.01679e-21	0.000157101	0.00699383	2.80838e+09
ENSP00000299957	ENSG00000166734	CASC4	cancer susceptibility candidate 4 [Source:HGNC Symbol;Acc:HGNC:24892]		0.1811926605504587	5	ENSP00000335063,ENSP00000453720,ENSP00000299957,ENSP00000453703,ENSP00000453465	8	8	81	2.89077e-24	0.000157101	0.00699383	2.31573e+08
ENSP00000300026	ENSG00000166794	PPIB	peptidylprolyl isomerase B (cyclophilin B) [Source:HGNC Symbol;Acc:HGNC:9255]		0.2638888888888889	1	ENSP00000300026	7	7	53	3.33564e-14	0.000157101	0.00699383	3.01395e+08
ENSP00000300055	ENSG00000166819	PLIN1	perilipin 1 [Source:HGNC Symbol;Acc:HGNC:9076]		0.028735632183908046	2	ENSP00000402167,ENSP00000300055	1	1	1	0.00510576	0.000460765	0.0172042	NA
ENSP00000300060	ENSG00000166825	ANPEP	alanyl (membrane) aminopeptidase [Source:HGNC Symbol;Acc:HGNC:500]		0.34643226473629785	3	ENSP00000300060,ENSP00000453405,ENSP00000453545	28	28	469	3.00131e-116	0.000157101	0.00699383	3495322112
ENSP00000300161	ENSG00000166913	YWHAB	tyrosine 3-monooxygenase/tryptophan 5-monooxygenase activation protein, beta [Source:HGNC Symbol;Acc:HGNC:12849]		0.1991869918699187	29	ENSP00000379286,ENSP00000430072,ENSP00000461762,ENSP00000379287,ENSP00000428860,ENSP00000487432,ENSP00000395114,ENSP00000340989,ENSP00000306330,ENSP00000309503,ENSP00000429623,ENSP00000394558,ENSP00000430058,ENSP00000398599,ENSP00000238081,ENSP00000264335,ENSP00000379281,ENSP00000379288,ENSP00000379278,ENSP00000300161,ENSP00000371267,ENSP00000361930,ENSP00000481059,ENSP00000487356,ENSP00000394729…	2	4	15	1.00443e-09	0.000157101	0.00699383	1.30073e+07
ENSP00000300289	ENSG00000167004	PDIA3	protein disulfide isomerase family A, member 3 [Source:HGNC Symbol;Acc:HGNC:4606]		0.3326732673267327	2	ENSP00000300289,ENSP00000389906	12	13	250	9.13656e-69	0.000157101	0.00699383	3.6527e+08
ENSP00000300527	ENSG00000142173	COL6A2	collagen, type VI, alpha 2 [Source:HGNC Symbol;Acc:HGNC:2212]		0.07163886162904809	4	ENSP00000300527,ENSP00000387115,ENSP00000312529,ENSP00000380870	3	6	21	7.16831e-14	0.000157101	0.00699383	NA
ENSP00000300605	ENSG00000167220	HDHD2	haloacid dehalogenase-like hydrolase domain containing 2 [Source:HGNC Symbol;Acc:HGNC:25364]		0.23552123552123552	7	ENSP00000466923,ENSP00000465282,ENSP00000300605,ENSP00000467998,ENSP00000466710,ENSP00000467775,ENSP00000468067	3	3	8	1.04155e-05	0.000460765	0.0172042	1.7132e+07
ENSP00000300632	ENSG00000167244	IGF2	insulin-like growth factor 2 [Source:HGNC Symbol;Acc:HGNC:5466]		0.4444444444444444	15	ENSP00000370796,ENSP00000370799,ENSP00000391826,ENSP00000462963,ENSP00000306574,ENSP00000370802,ENSP00000300632,ENSP00000462973,ENSP00000402047,ENSP00000351922,ENSP00000414497,ENSP00000421922,ENSP00000348573,ENSP00000378042,ENSP00000370813	6	7	188	1.54844e-23	0.000157101	0.00699383	4.1073e+09
ENSP00000300784	ENSG00000167363	FN3K	fructosamine 3 kinase [Source:HGNC Symbol;Acc:HGNC:24822]		0.13268608414239483	1	ENSP00000300784	4	4	28	1.44896e-14	0.000157101	0.00699383	3.58064e+07
ENSP00000300933	ENSG00000167460	TPM4	tropomyosin 4 [Source:HGNC Symbol;Acc:HGNC:12013]		0.40725806451612906	42	ENSP00000453092,ENSP00000354219,ENSP00000452658,ENSP00000357518,ENSP00000453062,ENSP00000467558,ENSP00000468246,ENSP00000267996,ENSP00000453955,ENSP00000480520,ENSP00000467087,ENSP00000350667,ENSP00000357520,ENSP00000367541,ENSP00000367542,ENSP00000466654,ENSP00000475952,ENSP00000339035,ENSP00000300933,ENSP00000452879,ENSP00000453724,ENSP00000384315,ENSP00000322577,ENSP00000367550,ENSP00000467319…	4	12	103	7.26349e-08	0.000460765	0.0172042	48160496
ENSP00000300961	ENSG00000167476	JSRP1	junctional sarcoplasmic reticulum protein 1 [Source:HGNC Symbol;Acc:HGNC:24963]		0.1027190332326284	1	ENSP00000300961	3	3	4	1.03085e-07	0.000460765	0.0172042	24542836
ENSP00000301149	ENSG00000167588	GPD1	glycerol-3-phosphate dehydrogenase 1 (soluble) [Source:HGNC Symbol;Acc:HGNC:4455]		0.25787965616045844	2	ENSP00000301149,ENSP00000446768	5	5	13	2.88979e-31	0.000157101	0.00699383	6.47826e+06
ENSP00000301263	ENSG00000167656	LY6D	lymphocyte antigen 6 complex, locus D [Source:HGNC Symbol;Acc:HGNC:13348]		0.2734375	1	ENSP00000301263	1	1	1	3.85732e-06	0.000157101	0.00699383	406649
ENSP00000301286	ENSG00000167676	PLIN4	perilipin 4 [Source:HGNC Symbol;Acc:HGNC:29393]		0.021370670596904937	1	ENSP00000301286	2	2	2	0.000125742	0.000755242	0.0250629	371324
ENSP00000301329	ENSG00000167699	GLOD4	glyoxalase domain containing 4 [Source:HGNC Symbol;Acc:HGNC:14111]		0.2080536912751678	6	ENSP00000301329,ENSP00000444315,ENSP00000458849,ENSP00000301328,ENSP00000460634,ENSP00000458796	6	6	21	9.66218e-19	0.000157101	0.00699383	8.10127e+07
ENSP00000301420	ENSG00000167748	KLK1	kallikrein 1 [Source:HGNC Symbol;Acc:HGNC:6357]		0.10305343511450382	1	ENSP00000301420	3	3	25	1.60417e-10	0.000157101	0.00699383	1.28295e+08
ENSP00000301455	ENSG00000167772	ANGPTL4	angiopoietin-like 4 [Source:HGNC Symbol;Acc:HGNC:16039]		0.027093596059113302	2	ENSP00000301455,ENSP00000472551	1	1	7	0.0228467	0.00126687	0.0366317	6.02239e+08
ENSP00000301458	ENSG00000167775	CD320	CD320 molecule [Source:HGNC Symbol;Acc:HGNC:16692]		0.0851063829787234	1	ENSP00000301458	1	1	1	0.0804537	0.00717386	0.152337	NA
ENSP00000301522	ENSG00000167815	PRDX2	peroxiredoxin 2 [Source:HGNC Symbol;Acc:HGNC:9353]		0.4797979797979798	7	ENSP00000301522,ENSP00000389047,ENSP00000407034,ENSP00000334063,ENSP00000262746,ENSP00000361150,ENSP00000361152	8	9	544	3.67705e-30	0.000157101	0.00699383	2.45815e+09
ENSP00000301653	ENSG00000186832	KRT16	keratin 16, type I [Source:HGNC Symbol;Acc:HGNC:6423]		0.40380549682875266	40	ENSP00000308452,ENSP00000264651,ENSP00000466625,ENSP00000225899,ENSP00000246635,ENSP00000225550,ENSP00000377616,ENSP00000485008,ENSP00000251645,ENSP00000377555,ENSP00000167588,ENSP00000441751,ENSP00000336604,ENSP00000460501,ENSP00000447278,ENSP00000251646,ENSP00000246639,ENSP00000246646,ENSP00000468221,ENSP00000409282,ENSP00000467418,ENSP00000467124,ENSP00000305263,ENSP00000408759,ENSP00000329165…	10	18	219	2.7062e-42	0.000157101	0.00699383	1.69427e+09
ENSP00000301678	ENSG00000167930	ITFG3	integrin alpha FG-GAP repeat containing 3 [Source:HGNC Symbol;Acc:HGNC:14163]		0.11231884057971014	9	ENSP00000301678,ENSP00000382814,ENSP00000407669,ENSP00000471331,ENSP00000398433,ENSP00000412581,ENSP00000301679,ENSP00000407875,ENSP00000399150	3	3	14	5.24184e-11	0.000157101	0.00699383	4.92624e+09
ENSP00000301764	ENSG00000167986	DDB1	damage-specific DNA binding protein 1, 127kDa [Source:HGNC Symbol;Acc:HGNC:2717]		0.08859649122807017	14	ENSP00000442660,ENSP00000445844,ENSP00000444650,ENSP00000441825,ENSP00000440269,ENSP00000445554,ENSP00000301764,ENSP00000437713,ENSP00000442732,ENSP00000446044,ENSP00000441522,ENSP00000444105,ENSP00000440660,ENSP00000399813	8	8	19	2.471e-20	0.000157101	0.00699383	10567102
ENSP00000301843	ENSG00000085733	CTTN	cortactin [Source:HGNC Symbol;Acc:HGNC:3338]		0.10545454545454545	5	ENSP00000301843,ENSP00000317189,ENSP00000365745,ENSP00000431421,ENSP00000436613	4	4	10	1.57521e-10	0.000460765	0.0172042	1345358
ENSP00000301945	ENSG00000169604	ANTXR1	anthrax toxin receptor 1 [Source:HGNC Symbol;Acc:HGNC:21014]		0.13120567375886524	4	ENSP00000386494,ENSP00000387058,ENSP00000430776,ENSP00000301945	6	6	40	3.53315e-24	0.000157101	0.00699383	1.39417e+08
ENSP00000302193	ENSG00000170962	PDGFD	platelet derived growth factor D [Source:HGNC Symbol;Acc:HGNC:30620]		0.03296703296703297	2	ENSP00000376865,ENSP00000302193	1	1	2	0.000921583	0.000460765	0.0172042	5952994
ENSP00000302486	ENSG00000169032	MAP2K1	mitogen-activated protein kinase kinase 1 [Source:HGNC Symbol;Acc:HGNC:6840]		0.17048346055979643	4	ENSP00000302486,ENSP00000456438,ENSP00000378336,ENSP00000262948	3	4	14	9.9413e-12	0.000157101	0.00699383	1.72114e+07
ENSP00000302572	ENSG00000113648	H2AFY	H2A histone family, member Y [Source:HGNC Symbol;Acc:HGNC:4740]		0.10512129380053908	3	ENSP00000302572,ENSP00000424971,ENSP00000423563	1	1	1	0.00175614	0.000460765	0.0172042	NA
ENSP00000302621	ENSG00000171236	LRG1	leucine-rich alpha-2-glycoprotein 1 [Source:HGNC Symbol;Acc:HGNC:29480]		0.42939481268011526	1	ENSP00000302621	10	10	960	1.61775e-49	0.000157101	0.00699383	16947737600
ENSP00000302665	ENSG00000017427	IGF1	insulin-like growth factor 1 (somatomedin C) [Source:HGNC Symbol;Acc:HGNC:5464]		0.1794871794871795	6	ENSP00000376637,ENSP00000376638,ENSP00000337612,ENSP00000394999,ENSP00000416811,ENSP00000302665	3	3	75	6.20696e-08	0.000157101	0.00699383	127517076
ENSP00000302886	ENSG00000170515	PA2G4	proliferation-associated 2G4, 38kDa [Source:HGNC Symbol;Acc:HGNC:8550]		0.1548223350253807	5	ENSP00000302886,ENSP00000447615,ENSP00000447389,ENSP00000449770,ENSP00000448557	5	5	27	2.1363e-10	0.000157101	0.00699383	280357076
ENSP00000302961	ENSG00000170606	HSPA4	heat shock 70kDa protein 4 [Source:HGNC Symbol;Acc:HGNC:5237]		0.325	4	ENSP00000478102,ENSP00000481686,ENSP00000480688,ENSP00000302961	23	23	166	6.39092e-93	0.000157101	0.00699383	3.96106e+09
ENSP00000303043	ENSG00000065427	KARS	lysyl-tRNA synthetase [Source:HGNC Symbol;Acc:HGNC:6215]		0.01507537688442211	2	ENSP00000325448,ENSP00000303043	1	1	1	0.0814084	0.00717386	0.152337	NA
ENSP00000303147	ENSG00000168906	MAT2A	methionine adenosyltransferase II, alpha [Source:HGNC Symbol;Acc:HGNC:6904]		0.1518987341772152	2	ENSP00000303147,ENSP00000386353	5	5	21	2.23521e-08	0.000157101	0.00699383	2.04612e+07
ENSP00000303208	ENSG00000169174	PCSK9	proprotein convertase subtilisin/kexin type 9 [Source:HGNC Symbol;Acc:HGNC:20001]		0.157514450867052	1	ENSP00000303208	10	10	153	1.96688e-64	0.000157101	0.00699383	8.11825e+09
ENSP00000303276	ENSG00000169385	RNASE2	ribonuclease, RNase A family, 2 (liver, eosinophil-derived neurotoxin) [Source:HGNC Symbol;Acc:HGNC:10045]		0.10559006211180125	1	ENSP00000303276	1	1	2	4.71161e-05	0.000157101	0.00699383	241661093
ENSP00000303351	ENSG00000150093	ITGB1	integrin, beta 1 (fibronectin receptor, beta polypeptide, antigen CD29 includes MDF2, MSK12) [Source:HGNC Symbol;Acc:HGNC:6153]		0.21428571428571427	14	ENSP00000404546,ENSP00000420282,ENSP00000418725,ENSP00000398029,ENSP00000303351,ENSP00000379350,ENSP00000431326,ENSP00000417537,ENSP00000417243,ENSP00000436214,ENSP00000388694,ENSP00000417799,ENSP00000420416,ENSP00000420792	17	17	170	8.48286e-62	0.000157101	0.00699383	2.32829e+09
ENSP00000303908	ENSG00000247596	TWF2	twinfilin actin-binding protein 2 [Source:HGNC Symbol;Acc:HGNC:9621]		0.18051575931232092	4	ENSP00000419980,ENSP00000303908,ENSP00000417517,ENSP00000426464	4	4	24	2.228e-19	0.000157101	0.00699383	1.39664e+08
ENSP00000304044	ENSG00000169347	GP2	glycoprotein 2 (zymogen granule membrane) [Source:HGNC Symbol;Acc:HGNC:4441]		0.06928838951310862	6	ENSP00000304044,ENSP00000461632,ENSP00000461061,ENSP00000343861,ENSP00000370767,ENSP00000370765	3	3	13	1.11964e-08	0.000460765	0.0172042	2.74785e+06
ENSP00000304133	ENSG00000171951	SCG2	secretogranin II [Source:HGNC Symbol;Acc:HGNC:10575]		0.17504051863857376	3	ENSP00000415468,ENSP00000304133,ENSP00000394702	7	7	23	3.18023e-26	0.000157101	0.00699383	25079829
ENSP00000304236	ENSG00000170458	CD14	CD14 molecule [Source:HGNC Symbol;Acc:HGNC:1628]		0.2906666666666667	4	ENSP00000426543,ENSP00000430884,ENSP00000304236,ENSP00000385519	8	8	391	6.02508e-41	0.000157101	0.00699383	4.66103e+09
ENSP00000304247	ENSG00000099866	MADCAM1	mucosal vascular addressin cell adhesion molecule 1 [Source:HGNC Symbol;Acc:HGNC:6765]		0.05084745762711865	7	ENSP00000480908,ENSP00000483663,ENSP00000215637,ENSP00000484317,ENSP00000304247,ENSP00000480104,ENSP00000484153	1	1	7	6.3316e-06	0.000157101	0.00699383	35126006
ENSP00000304311	ENSG00000172016	REG3A	regenerating islet-derived 3 alpha [Source:HGNC Symbol;Acc:HGNC:8601]		0.06285714285714286	3	ENSP00000304311,ENSP00000386630,ENSP00000377456	1	1	14	0.000760495	0.000460765	0.0172042	2.39266e+07
ENSP00000304408	ENSG00000168542	COL3A1	collagen, type III, alpha 1 [Source:HGNC Symbol;Acc:HGNC:2201]		0.056616643929058665	2	ENSP00000315243,ENSP00000304408	7	7	115	1.05822e-33	0.000157101	0.00699383	3.82567e+09
ENSP00000304467	ENSG00000172009	THOP1	thimet oligopeptidase 1 [Source:HGNC Symbol;Acc:HGNC:11793]		0.16545718432510886	7	ENSP00000464786,ENSP00000304467,ENSP00000465855,ENSP00000465895,ENSP00000467226,ENSP00000465545,ENSP00000378638	7	7	37	1.05112e-30	0.000157101	0.00699383	6.67801e+08
ENSP00000304592	ENSG00000169710	FASN	fatty acid synthase [Source:HGNC Symbol;Acc:HGNC:3594]		0.07327757865392275	1	ENSP00000304592	11	11	30	5.81795e-42	0.000157101	0.00699383	106951080
ENSP00000304668	ENSG00000170445	HARS	histidyl-tRNA synthetase [Source:HGNC Symbol;Acc:HGNC:4816]		0.07349665924276169	13	ENSP00000393244,ENSP00000230771,ENSP00000387893,ENSP00000411511,ENSP00000430063,ENSP00000421576,ENSP00000425634,ENSP00000425889,ENSP00000423616,ENSP00000425695,ENSP00000407105,ENSP00000411085,ENSP00000304668	3	3	9	6.48747e-05	0.000755242	0.0250629	8160070
ENSP00000304782	ENSG00000172828	CES3	carboxylesterase 3 [Source:HGNC Symbol;Acc:HGNC:1865]		0.07355516637478109	4	ENSP00000457547,ENSP00000304782,ENSP00000377602,ENSP00000445559	3	3	18	3.22183e-11	0.000157101	0.00699383	9.66858e+07
ENSP00000304945	ENSG00000154133	ROBO4	roundabout, axon guidance receptor, homolog 4 (Drosophila) [Source:HGNC Symbol;Acc:HGNC:17985]		0.10923535253227408	2	ENSP00000437129,ENSP00000304945	6	6	106	2.75271e-18	0.000157101	0.00699383	1.0025e+10
ENSP00000305193	ENSG00000118960	HS1BP3	HCLS1 binding protein 3 [Source:HGNC Symbol;Acc:HGNC:24979]		0.1377551020408163	5	ENSP00000305193,ENSP00000384984,ENSP00000397546,ENSP00000385788,ENSP00000392203	4	4	9	1.17743e-10	0.000157101	0.00699383	3.16823e+06
ENSP00000305556	ENSG00000169564	PCBP1	poly(rC) binding protein 1 [Source:HGNC Symbol;Acc:HGNC:8647]		0.1601123595505618	22	ENSP00000383164,ENSP00000448847,ENSP00000448927,ENSP00000394116,ENSP00000449062,ENSP00000456412,ENSP00000383165,ENSP00000352438,ENSP00000352228,ENSP00000449070,ENSP00000446601,ENSP00000408949,ENSP00000383163,ENSP00000447670,ENSP00000383168,ENSP00000305556,ENSP00000383159,ENSP00000401198,ENSP00000388008,ENSP00000448762,ENSP00000383160,ENSP00000390304	2	2	8	6.16898e-09	0.000157101	0.00699383	1.1555e+07
ENSP00000305595	ENSG00000170340	B3GNT2	UDP-GlcNAc:betaGal beta-1,3-N-acetylglucosaminyltransferase 2 [Source:HGNC Symbol;Acc:HGNC:15629]		0.2216624685138539	2	ENSP00000305595,ENSP00000384692	7	7	113	7.52412e-27	0.000157101	0.00699383	1167057952
ENSP00000305675	ENSG00000168497	SDPR	serum deprivation response [Source:HGNC Symbol;Acc:HGNC:10690]		0.15058823529411763	1	ENSP00000305675	4	4	18	1.61171e-16	0.000157101	0.00699383	4.32858e+08
ENSP00000305731	ENSG00000170373	CST1	cystatin SN [Source:HGNC Symbol;Acc:HGNC:2473]		0.3546099290780142	2	ENSP00000381439,ENSP00000305731	3	3	14	2.01459e-17	0.000157101	0.00699383	3.47455e+07
ENSP00000306099	ENSG00000171564	FGB	fibrinogen beta chain [Source:HGNC Symbol;Acc:HGNC:3662]		0.6904276985743381	2	ENSP00000426757,ENSP00000306099	61	61	3751	0	0.000157101	0.00699383	22802715648
ENSP00000306190	ENSG00000117090	SLAMF1	signaling lymphocytic activation molecule family member 1 [Source:HGNC Symbol;Acc:HGNC:10903]		0.07164179104477612	3	ENSP00000438406,ENSP00000235739,ENSP00000306190	2	2	9	7.22433e-08	0.000157101	0.00699383	2.55508e+07
ENSP00000306276	ENSG00000172061	LRRC15	leucine rich repeat containing 15 [Source:HGNC Symbol;Acc:HGNC:20818]		0.04647160068846816	2	ENSP00000306276,ENSP00000413707	2	2	4	5.33651e-07	0.000157101	0.00699383	8063285
ENSP00000306279	ENSG00000169344	UMOD	uromodulin [Source:HGNC Symbol;Acc:HGNC:12559]		0.115625	4	ENSP00000379438,ENSP00000460548,ENSP00000306279,ENSP00000379442	4	4	46	2.10219e-20	0.000157101	0.00699383	1.14535e+09
ENSP00000306330	ENSG00000170027	YWHAG	tyrosine 3-monooxygenase/tryptophan 5-monooxygenase activation protein, gamma [Source:HGNC Symbol;Acc:HGNC:12852]		0.13360323886639677	29	ENSP00000379286,ENSP00000430072,ENSP00000461762,ENSP00000379287,ENSP00000428860,ENSP00000487432,ENSP00000395114,ENSP00000340989,ENSP00000306330,ENSP00000309503,ENSP00000429623,ENSP00000394558,ENSP00000430058,ENSP00000398599,ENSP00000238081,ENSP00000264335,ENSP00000379281,ENSP00000379288,ENSP00000379278,ENSP00000300161,ENSP00000371267,ENSP00000361930,ENSP00000481059,ENSP00000487356,ENSP00000394729…	2	4	28	4.15228e-06	0.000157101	0.00699383	4388271
ENSP00000306361	ENSG00000171560	FGA	fibrinogen alpha chain [Source:HGNC Symbol;Acc:HGNC:3661]		0.5381062355658198	3	ENSP00000478487,ENSP00000306361,ENSP00000385981	55	55	2199	1.67675e-261	0.000157101	0.00699383	20419862528
ENSP00000306390	ENSG00000172382	PRSS27	protease, serine 27 [Source:HGNC Symbol;Acc:HGNC:15475]		0.03103448275862069	1	ENSP00000306390	1	1	10	0.00462329	0.000460765	0.0172042	1.3997e+07
ENSP00000306844	ENSG00000168758	SEMA4C	sema domain, immunoglobulin domain (Ig), transmembrane domain (TM) and short cytoplasmic domain, (semaphorin) 4C [Source:HGNC Symbol;Acc:HGNC:10731]		0.06602641056422569	3	ENSP00000393498,ENSP00000306844,ENSP00000391094	3	3	23	2.29416e-17	0.000157101	0.00699383	1.95381e+08
ENSP00000306864	ENSG00000168140	VASN	vasorin [Source:HGNC Symbol;Acc:HGNC:18517]		0.1738484398216939	2	ENSP00000481884,ENSP00000306864	7	7	533	4.27542e-33	0.000157101	0.00699383	1.02146e+10
ENSP00000307132	ENSG00000170367	CST5	cystatin D [Source:HGNC Symbol;Acc:HGNC:2477]		0.2746478873239437	1	ENSP00000307132	2	2	2	0.00221204	0.000460765	0.0172042	382036
ENSP00000307156	ENSG00000172037	LAMB2	laminin, beta 2 (laminin S) [Source:HGNC Symbol;Acc:HGNC:6487]		0.2803114571746385	3	ENSP00000307156,ENSP00000388325,ENSP00000444751	33	33	284	3.05654e-137	0.000157101	0.00699383	1.49452e+09
ENSP00000307387	ENSG00000170248	PDCD6IP	programmed cell death 6 interacting protein [Source:HGNC Symbol;Acc:HGNC:8766]		0.18317972350230416	4	ENSP00000415150,ENSP00000307387,ENSP00000411825,ENSP00000406693	14	14	63	8.15144e-38	0.000157101	0.00699383	1.56049e+08
ENSP00000307423	ENSG00000168282	MGAT2	mannosyl (alpha-1,6-)-glycoprotein beta-1,2-N-acetylglucosaminyltransferase [Source:HGNC Symbol;Acc:HGNC:7045]		0.26174496644295303	1	ENSP00000307423	6	6	38	5.3205e-21	0.000157101	0.00699383	3.81484e+07
ENSP00000307513	ENSG00000011028	MRC2	mannose receptor, C type 2 [Source:HGNC Symbol;Acc:HGNC:16875]		0.06964164976335362	1	ENSP00000307513	7	7	25	2.14852e-32	0.000157101	0.00699383	7.75659e+08
ENSP00000307540	ENSG00000170369	CST2	cystatin SA [Source:HGNC Symbol;Acc:HGNC:2474]		0.16312056737588654	2	ENSP00000217423,ENSP00000307540	1	2	11	3.22898e-05	0.000157101	0.00699383	4.5706e+06
ENSP00000307549	ENSG00000171246	NPTX1	neuronal pentraxin I [Source:HGNC Symbol;Acc:HGNC:7952]		0.11574074074074074	1	ENSP00000307549	3	3	14	3.33354e-12	0.000157101	0.00699383	2.43946e+08
ENSP00000307674	ENSG00000171302	CANT1	calcium activated nucleotidase 1 [Source:HGNC Symbol;Acc:HGNC:19721]		0.22693266832917705	5	ENSP00000307674,ENSP00000467437,ENSP00000477798,ENSP00000466743,ENSP00000376241	7	7	64	2.32408e-28	0.000157101	0.00699383	1.0189e+08
ENSP00000307870	ENSG00000173992	CCS	copper chaperone for superoxide dismutase [Source:HGNC Symbol;Acc:HGNC:1613]		0.20784313725490197	4	ENSP00000436318,ENSP00000307870,ENSP00000436379,ENSP00000433609	2	2	8	9.95453e-06	0.000460765	0.0172042	4136718
ENSP00000307900	ENSG00000135821	GLUL	glutamate-ammonia ligase [Source:HGNC Symbol;Acc:HGNC:4341]		0.06166219839142091	4	ENSP00000344958,ENSP00000398320,ENSP00000356537,ENSP00000307900	2	2	3	1.3139e-05	0.000157101	0.00699383	6333558
ENSP00000307940	ENSG00000167658	EEF2	eukaryotic translation elongation factor 2 [Source:HGNC Symbol;Acc:HGNC:3214]		0.24475524475524477	1	ENSP00000307940	13	13	59	2.39215e-56	0.000157101	0.00699383	2356820264
ENSP00000308117	ENSG00000174807	CD248	CD248 molecule, endosialin [Source:HGNC Symbol;Acc:HGNC:18219]		0.130779392338177	1	ENSP00000308117	4	4	87	7.50413e-33	0.000157101	0.00699383	2.89798e+09
ENSP00000308383	ENSG00000130592	LSP1	lymphocyte-specific protein 1 [Source:HGNC Symbol;Acc:HGNC:6707]		0.30383480825958703	10	ENSP00000371194,ENSP00000383932,ENSP00000308383,ENSP00000412405,ENSP00000384022,ENSP00000484140,ENSP00000400999,ENSP00000416363,ENSP00000402543,ENSP00000400346	5	5	10	1.33218e-25	0.000157101	0.00699383	1.39515e+07
ENSP00000308452	ENSG00000128422	KRT17	keratin 17, type I [Source:HGNC Symbol;Acc:HGNC:6427]		0.3773148148148148	41	ENSP00000308452,ENSP00000264651,ENSP00000466625,ENSP00000225899,ENSP00000246635,ENSP00000225550,ENSP00000377616,ENSP00000485008,ENSP00000251645,ENSP00000467418,ENSP00000167588,ENSP00000441751,ENSP00000336604,ENSP00000460501,ENSP00000447278,ENSP00000251646,ENSP00000167586,ENSP00000246639,ENSP00000246646,ENSP00000468221,ENSP00000409282,ENSP00000377555,ENSP00000305263,ENSP00000408759,ENSP00000329165…	8	15	202	3.80234e-36	0.000157101	0.00699383	6.59994e+07
ENSP00000308532	ENSG00000113758	DBN1	drebrin 1 [Source:HGNC Symbol;Acc:HGNC:2695]		0.1016949152542373	6	ENSP00000423208,ENSP00000377195,ENSP00000292385,ENSP00000308532,ENSP00000422854,ENSP00000421465	4	4	14	1.293e-15	0.000157101	0.00699383	129745606
ENSP00000308541	ENSG00000180210	F2	coagulation factor II (thrombin) [Source:HGNC Symbol;Acc:HGNC:3535]		0.6463022508038585	3	ENSP00000308541,ENSP00000387413,ENSP00000433907	57	57	9911	1.20754e-296	0.000157101	0.00699383	22724096000
ENSP00000308606	ENSG00000173467	AGR3	anterior gradient 3 [Source:HGNC Symbol;Acc:HGNC:24167]		0.15060240963855423	3	ENSP00000308606,ENSP00000386016,ENSP00000392818	4	4	43	8.5596e-13	0.000157101	0.00699383	4.41572e+07
ENSP00000308716	ENSG00000175189	INHBC	inhibin, beta C [Source:HGNC Symbol;Acc:HGNC:6068]		0.10795454545454546	1	ENSP00000308716	3	3	113	0.0026787	0.00101792	0.0312306	3062982720
ENSP00000308720	ENSG00000204983	PRSS1	protease, serine, 1 (trypsin 1) [Source:HGNC Symbol;Acc:HGNC:9475]		0.1417004048582996	7	ENSP00000479217,ENSP00000419912,ENSP00000308720,ENSP00000417854,ENSP00000479959,ENSP00000481361,ENSP00000478237	2	2	18	1.21712e-09	0.000157101	0.00699383	2.32169e+07
ENSP00000308727	ENSG00000173705	SUSD5	sushi domain containing 5 [Source:HGNC Symbol;Acc:HGNC:29061]		0.11446740858505565	2	ENSP00000406475,ENSP00000308727	3	3	4	0.000815824	0.00101792	0.0312306	NA
ENSP00000308753	ENSG00000138594	TMOD3	tropomodulin 3 (ubiquitous) [Source:HGNC Symbol;Acc:HGNC:11873]		0.08806818181818182	3	ENSP00000308753,ENSP00000454161,ENSP00000438909	2	2	5	6.71425e-06	0.000157101	0.00699383	1.96167e+08
ENSP00000308938	ENSG00000122194	PLG	plasminogen [Source:HGNC Symbol;Acc:HGNC:9071]		0.6506172839506172	8	ENSP00000355891,ENSP00000347933,ENSP00000308938,ENSP00000352458,ENSP00000386317,ENSP00000389424,ENSP00000386505,ENSP00000386975	66	68	11155	0	0.000157101	0.00699383	25937968128
ENSP00000309096	ENSG00000174684	B4GAT1	beta-1,4-glucuronyltransferase 1 [Source:HGNC Symbol;Acc:HGNC:15685]		0.25301204819277107	1	ENSP00000309096	9	9	134	2.00465e-33	0.000157101	0.00699383	2.03317e+09
ENSP00000309148	ENSG00000167755	KLK6	kallikrein-related peptidase 6 [Source:HGNC Symbol;Acc:HGNC:6367]		0.29098360655737704	4	ENSP00000366047,ENSP00000375684,ENSP00000470482,ENSP00000309148	5	5	38	9.29914e-30	0.000157101	0.00699383	3.2885e+07
ENSP00000309477	ENSG00000122729	ACO1	aconitase 1, soluble [Source:HGNC Symbol;Acc:HGNC:117]		0.23397075365579303	3	ENSP00000438733,ENSP00000309477,ENSP00000369255	14	14	62	1.41846e-61	0.000157101	0.00699383	2069003024
ENSP00000309503	ENSG00000164924	YWHAZ	tyrosine 3-monooxygenase/tryptophan 5-monooxygenase activation protein, zeta [Source:HGNC Symbol;Acc:HGNC:12855]		0.49795918367346936	32	ENSP00000379286,ENSP00000430072,ENSP00000461762,ENSP00000379287,ENSP00000379288,ENSP00000487432,ENSP00000395114,ENSP00000394880,ENSP00000340989,ENSP00000306330,ENSP00000309503,ENSP00000429623,ENSP00000379281,ENSP00000430058,ENSP00000430219,ENSP00000416551,ENSP00000238081,ENSP00000428381,ENSP00000429041,ENSP00000398599,ENSP00000428860,ENSP00000379278,ENSP00000300161,ENSP00000264335,ENSP00000361930…	8	9	111	4.70468e-28	0.000157101	0.00699383	3.1672e+09
ENSP00000309539	ENSG00000092964	DPYSL2	dihydropyrimidinase-like 2 [Source:HGNC Symbol;Acc:HGNC:3014]		0.21678321678321677	11	ENSP00000426720,ENSP00000343690,ENSP00000321606,ENSP00000431117,ENSP00000309539,ENSP00000380987,ENSP00000381526,ENSP00000427985,ENSP00000425742,ENSP00000427954,ENSP00000430267	5	7	26	1.34813e-22	0.000157101	0.00699383	1.14654e+07
ENSP00000309757	ENSG00000175445	LPL	lipoprotein lipase [Source:HGNC Symbol;Acc:HGNC:6677]		0.14526315789473684	4	ENSP00000309757,ENSP00000428237,ENSP00000428557,ENSP00000428496	6	6	84	8.21512e-27	0.000157101	0.00699383	3.27033e+08
ENSP00000309893	ENSG00000173905	GOLIM4	golgi integral membrane protein 4 [Source:HGNC Symbol;Acc:HGNC:15448]		0.18413173652694612	2	ENSP00000309893,ENSP00000417354	6	6	15	1.24088e-20	0.000157101	0.00699383	9.77553e+08
ENSP00000310117	ENSG00000173457	PPP1R14B	protein phosphatase 1, regulatory (inhibitor) subunit 14B [Source:HGNC Symbol;Acc:HGNC:9057]		0.29931972789115646	5	ENSP00000441067,ENSP00000339916,ENSP00000439333,ENSP00000384602,ENSP00000310117	2	2	3	5.93729e-13	0.000157101	0.00699383	3.7449e+06
ENSP00000310129	ENSG00000175166	PSMD2	proteasome (prosome, macropain) 26S subunit, non-ATPase, 2 [Source:HGNC Symbol;Acc:HGNC:9559]		0.07819383259911894	5	ENSP00000416028,ENSP00000407259,ENSP00000414061,ENSP00000402618,ENSP00000310129	6	6	18	1.63561e-12	0.000157101	0.00699383	2.78073e+09
ENSP00000310275	ENSG00000175334	BANF1	barrier to autointegration factor 1 [Source:HGNC Symbol;Acc:HGNC:17397]		0.2696629213483146	4	ENSP00000416128,ENSP00000432867,ENSP00000433760,ENSP00000310275	1	1	2	0.000829424	0.000460765	0.0172042	1414418
ENSP00000310440	ENSG00000130724	CHMP2A	charged multivesicular body protein 2A [Source:HGNC Symbol;Acc:HGNC:30216]		0.11711711711711711	6	ENSP00000469240,ENSP00000471961,ENSP00000472097,ENSP00000472680,ENSP00000469453,ENSP00000310440	2	2	4	0.0269755	0.00391009	0.092069	418430
ENSP00000310491	ENSG00000175220	ARHGAP1	Rho GTPase activating protein 1 [Source:HGNC Symbol;Acc:HGNC:673]		0.1366742596810934	3	ENSP00000434883,ENSP00000310491,ENSP00000432794	4	4	28	2.30133e-13	0.000157101	0.00699383	174369996
ENSP00000310810	ENSG00000095713	CRTAC1	cartilage acidic protein 1 [Source:HGNC Symbol;Acc:HGNC:14882]		0.5259026687598116	4	ENSP00000408445,ENSP00000359629,ENSP00000310810,ENSP00000359623	23	23	544	7.87033e-138	0.000157101	0.00699383	8.65031e+09
ENSP00000310832	ENSG00000174080	CTSF	cathepsin F [Source:HGNC Symbol;Acc:HGNC:2531]		0.21487603305785125	4	ENSP00000310832,ENSP00000434936,ENSP00000433082,ENSP00000435822	9	9	44	1.57239e-40	0.000157101	0.00699383	571085212
ENSP00000310978	ENSG00000175309	PHYKPL	5-phosphohydroxy-L-lysine phospho-lyase [Source:HGNC Symbol;Acc:HGNC:28249]		0.10666666666666667	5	ENSP00000421810,ENSP00000310978,ENSP00000423806,ENSP00000377128,ENSP00000321290	4	4	20	1.22761e-12	0.000157101	0.00699383	16161207
ENSP00000311032	ENSG00000164305	CASP3	caspase 3, apoptosis-related cysteine peptidase [Source:HGNC Symbol;Acc:HGNC:1504]		0.21660649819494585	7	ENSP00000407142,ENSP00000478339,ENSP00000377213,ENSP00000377210,ENSP00000311032,ENSP00000428929,ENSP00000428372	4	4	10	1.87832e-11	0.000157101	0.00699383	1591360
ENSP00000311113	ENSG00000173801	JUP	junction plakoglobin [Source:HGNC Symbol;Acc:HGNC:6207]		0.12483221476510067	9	ENSP00000401034,ENSP00000409948,ENSP00000468347,ENSP00000394146,ENSP00000411449,ENSP00000311113,ENSP00000389886,ENSP00000377508,ENSP00000377507	9	9	42	1.96591e-38	0.000157101	0.00699383	14961610
ENSP00000311130	ENSG00000173540	GMPPB	GDP-mannose pyrophosphorylase B [Source:HGNC Symbol;Acc:HGNC:22932]		0.03333333333333333	3	ENSP00000418565,ENSP00000311130,ENSP00000309092	1	1	1	0.000157666	0.000157101	0.00699383	416161
ENSP00000311184	ENSG00000173714	WFIKKN2	WAP, follistatin/kazal, immunoglobulin, kunitz and netrin domain containing 2 [Source:HGNC Symbol;Acc:HGNC:30916]		0.1597222222222222	3	ENSP00000405889,ENSP00000311184,ENSP00000324763	7	8	66	1.23959e-23	0.000157101	0.00699383	449948828
ENSP00000311313	ENSG00000175315	CST6	cystatin E/M [Source:HGNC Symbol;Acc:HGNC:2478]		0.3624161073825503	1	ENSP00000311313	7	7	38	1.64466e-39	0.000157101	0.00699383	60246908
ENSP00000311502	ENSG00000173706	HEG1	heart development protein with EGF-like domains 1 [Source:HGNC Symbol;Acc:HGNC:29227]		0.1223750905141202	3	ENSP00000311502,ENSP00000417648,ENSP00000417494	10	10	98	4.41574e-58	0.000157101	0.00699383	1.125e+09
ENSP00000311713	ENSG00000172939	OXSR1	oxidative stress responsive 1 [Source:HGNC Symbol;Acc:HGNC:8508]		0.11195445920303605	4	ENSP00000415851,ENSP00000348278,ENSP00000398356,ENSP00000311713	3	4	19	9.23869e-14	0.000157101	0.00699383	1.31936e+07
ENSP00000311809	ENSG00000187955	COL14A1	collagen, type XIV, alpha 1 [Source:HGNC Symbol;Acc:HGNC:2191]		0.10224719101123596	7	ENSP00000311809,ENSP00000247781,ENSP00000297848,ENSP00000429123,ENSP00000409461,ENSP00000428851,ENSP00000443974	14	14	53	1.60682e-48	0.000157101	0.00699383	22520992
ENSP00000311888	ENSG00000131446	MGAT1	mannosyl (alpha-1,3-)-glycoprotein beta-1,2-N-acetylglucosaminyltransferase [Source:HGNC Symbol;Acc:HGNC:7044]		0.15280898876404495	13	ENSP00000332073,ENSP00000424382,ENSP00000421738,ENSP00000422588,ENSP00000423401,ENSP00000402838,ENSP00000422906,ENSP00000377010,ENSP00000425988,ENSP00000311888,ENSP00000427116,ENSP00000404718,ENSP00000424891	9	9	80	3.07475e-21	0.000157101	0.00699383	3.87418e+08
ENSP00000312262	ENSG00000173020	ADRBK1	adrenergic, beta, receptor kinase 1 [Source:HGNC Symbol;Acc:HGNC:289]		0.03193033381712627	4	ENSP00000434126,ENSP00000478925,ENSP00000312262,ENSP00000317578	2	2	3	4.62596e-05	0.000460765	0.0172042	698616
ENSP00000312284	ENSG00000258484	SPESP1	sperm equatorial segment protein 1 [Source:HGNC Symbol;Acc:HGNC:15570]		0.08571428571428572	1	ENSP00000312284	2	2	9	1.14398e-09	0.000157101	0.00699383	2.82877e+08
ENSP00000312326	ENSG00000131471	AOC3	amine oxidase, copper containing 3 [Source:HGNC Symbol;Acc:HGNC:550]		0.16251638269986893	8	ENSP00000312326,ENSP00000406134,ENSP00000477686,ENSP00000465913,ENSP00000468632,ENSP00000253799,ENSP00000468043,ENSP00000484312	7	10	221	1.43486e-43	0.000157101	0.00699383	2.83473e+09
ENSP00000312435	ENSG00000173402	DAG1	dystroglycan 1 (dystrophin-associated glycoprotein 1) [Source:HGNC Symbol;Acc:HGNC:2666]		0.16089385474860335	9	ENSP00000439334,ENSP00000412067,ENSP00000440705,ENSP00000388833,ENSP00000438421,ENSP00000312435,ENSP00000442600,ENSP00000401382,ENSP00000440590	9	9	142	1.05565e-49	0.000157101	0.00699383	5.13567e+09
ENSP00000312506	ENSG00000173546	CSPG4	chondroitin sulfate proteoglycan 4 [Source:HGNC Symbol;Acc:HGNC:2466]		0.1231696813092162	1	ENSP00000312506	20	20	95	3.13741e-80	0.000157101	0.00699383	1.87531e+09
ENSP00000312606	ENSG00000117448	AKR1A1	aldo-keto reductase family 1, member A1 (aldehyde reductase) [Source:HGNC Symbol;Acc:HGNC:380]		0.28923076923076924	6	ENSP00000398414,ENSP00000476713,ENSP00000361140,ENSP00000480713,ENSP00000312606,ENSP00000476978	7	7	40	4.20245e-26	0.000157101	0.00699383	1.96673e+08
ENSP00000312652	ENSG00000174697	LEP	leptin [Source:HGNC Symbol;Acc:HGNC:6553]		0.07784431137724551	1	ENSP00000312652	1	1	5	0.000283981	0.000460765	0.0172042	7.26691e+07
ENSP00000312671	ENSG00000173442	EHBP1L1	EH domain binding protein 1-like 1 [Source:HGNC Symbol;Acc:HGNC:30682]		0.1490479317137229	4	ENSP00000434693,ENSP00000431996,ENSP00000312671,ENSP00000435843	15	15	31	8.04819e-54	0.000157101	0.00699383	22260274
ENSP00000312700	ENSG00000177191	B3GNT8	UDP-GlcNAc:betaGal beta-1,3-N-acetylglucosaminyltransferase 8 [Source:HGNC Symbol;Acc:HGNC:24139]		0.20151133501259447	1	ENSP00000312700	3	3	16	4.62167e-14	0.000157101	0.00699383	6.35436e+06
ENSP00000312893	ENSG00000115317	HTRA2	HtrA serine peptidase 2 [Source:HGNC Symbol;Acc:HGNC:14348]		0.13573407202216067	3	ENSP00000258080,ENSP00000399166,ENSP00000312893	3	3	7	1.62001e-08	0.000157101	0.00699383	6.35764e+07
ENSP00000312946	ENSG00000010327	STAB1	stabilin 1 [Source:HGNC Symbol;Acc:HGNC:18628]		0.11634241245136187	1	ENSP00000312946	17	17	139	9.59869e-75	0.000157101	0.00699383	4.14308e+09
ENSP00000313432	ENSG00000137106	GRHPR	glyoxylate reductase/hydroxypyruvate reductase [Source:HGNC Symbol;Acc:HGNC:4570]		0.10975609756097561	2	ENSP00000313432,ENSP00000475569	3	3	16	3.18032e-07	0.000157101	0.00699383	252753441
ENSP00000313490	ENSG00000178921	PFAS	phosphoribosylformylglycinamidine synthase [Source:HGNC Symbol;Acc:HGNC:8863]		0.07623318385650224	3	ENSP00000313490,ENSP00000443244,ENSP00000462874	7	7	30	1.11237e-26	0.000157101	0.00699383	599628876
ENSP00000313569	ENSG00000169727	GPS1	G protein pathway suppressor 1 [Source:HGNC Symbol;Acc:HGNC:4549]		0.08917197452229299	10	ENSP00000462391,ENSP00000485330,ENSP00000462265,ENSP00000462029,ENSP00000302873,ENSP00000485035,ENSP00000376167,ENSP00000463690,ENSP00000313569,ENSP00000485641	1	3	14	0.00880654	0.00101792	0.0312306	1551680
ENSP00000313571	ENSG00000178934	LGALS7B	lectin, galactoside-binding, soluble, 7B [Source:HGNC Symbol;Acc:HGNC:34447]		0.18382352941176472	2	ENSP00000313571,ENSP00000367891	2	2	16	8.59908e-07	0.000460765	0.0172042	4.91349e+08
ENSP00000314067	ENSG00000180370	PAK2	p21 protein (Cdc42/Rac)-activated kinase 2 [Source:HGNC Symbol;Acc:HGNC:8591]		0.23282442748091603	17	ENSP00000348696,ENSP00000410853,ENSP00000361077,ENSP00000353864,ENSP00000361080,ENSP00000401982,ENSP00000429113,ENSP00000428921,ENSP00000484798,ENSP00000278568,ENSP00000314067,ENSP00000402927,ENSP00000433423,ENSP00000431541,ENSP00000389172,ENSP00000433211,ENSP00000262836	4	6	38	1.55024e-27	0.000157101	0.00699383	13927100
ENSP00000314299	ENSG00000244414	CFHR1	complement factor H-related 1 [Source:HGNC Symbol;Acc:HGNC:4888]		0.603030303030303	7	ENSP00000476677,ENSP00000256785,ENSP00000314299,ENSP00000356385,ENSP00000356399,ENSP00000356391,ENSP00000356394	2	15	2286	1.46176e-07	0.000460765	0.0172042	1.07963e+09
ENSP00000314901	ENSG00000175928	LRRN1	leucine rich repeat neuronal 1 [Source:HGNC Symbol;Acc:HGNC:20980]		0.17737430167597765	1	ENSP00000314901	9	9	47	1.45199e-34	0.000157101	0.00699383	5.88757e+08
ENSP00000314910	ENSG00000050165	DKK3	dickkopf WNT signaling pathway inhibitor 3 [Source:HGNC Symbol;Acc:HGNC:2893]		0.37714285714285717	6	ENSP00000431604,ENSP00000435269,ENSP00000379762,ENSP00000433112,ENSP00000314910,ENSP00000436645	13	13	115	2.20669e-51	0.000157101	0.00699383	84818408
ENSP00000315130	ENSG00000120885	CLU	clusterin [Source:HGNC Symbol;Acc:HGNC:2095]		0.40089086859688194	13	ENSP00000429881,ENSP00000428033,ENSP00000315130,ENSP00000429336,ENSP00000385419,ENSP00000431070,ENSP00000431026,ENSP00000427868,ENSP00000428526,ENSP00000429620,ENSP00000428779,ENSP00000430821,ENSP00000453247	29	29	6050	7.40129e-100	0.000157101	0.00699383	22420249600
ENSP00000315190	ENSG00000005884	ITGA3	integrin, alpha 3 (antigen CD49C, alpha 3 subunit of VLA-3 receptor) [Source:HGNC Symbol;Acc:HGNC:6139]		0.022835394862036156	2	ENSP00000315190,ENSP00000007722	2	2	7	0.0101191	0.00126687	0.0366317	8928398
ENSP00000315383	ENSG00000244617	ASPRV1	aspartic peptidase, retroviral-like 1 [Source:HGNC Symbol;Acc:HGNC:26321]		0.13119533527696792	1	ENSP00000315383	2	2	7	1.53826e-13	0.000157101	0.00699383	42329088
ENSP00000315407	ENSG00000090659	CD209	CD209 molecule [Source:HGNC Symbol;Acc:HGNC:1641]		0.2131578947368421	21	ENSP00000470137,ENSP00000468827,ENSP00000204801,ENSP00000351954,ENSP00000346373,ENSP00000315477,ENSP00000377728,ENSP00000471125,ENSP00000248228,ENSP00000470286,ENSP00000335228,ENSP00000377716,ENSP00000377680,ENSP00000470132,ENSP00000316228,ENSP00000470530,ENSP00000471132,ENSP00000471348,ENSP00000470658,ENSP00000315407,ENSP00000471137	5	7	32	2.51652e-13	0.000157101	0.00699383	13201701
ENSP00000315630	ENSG00000133789	SWAP70	SWAP switching B-cell complex 70kDa subunit [Source:HGNC Symbol;Acc:HGNC:17070]		0.13504273504273503	3	ENSP00000399056,ENSP00000315630,ENSP00000435587	8	8	19	1.08463e-10	0.000460765	0.0172042	7.39498e+06
ENSP00000315731	ENSG00000176845	METRNL	meteorin, glial cell differentiation regulator-like [Source:HGNC Symbol;Acc:HGNC:27584]		0.24437299035369775	4	ENSP00000458566,ENSP00000315731,ENSP00000460798,ENSP00000481759	4	4	22	5.54039e-16	0.000157101	0.00699383	2.58777e+07
ENSP00000315757	ENSG00000136167	LCP1	lymphocyte cytosolic protein 1 (L-plastin) [Source:HGNC Symbol;Acc:HGNC:6528]		0.543859649122807	14	ENSP00000487361,ENSP00000398945,ENSP00000408052,ENSP00000315757,ENSP00000289290,ENSP00000402157,ENSP00000348163,ENSP00000387890,ENSP00000445339,ENSP00000381581,ENSP00000336831,ENSP00000417481,ENSP00000418700,ENSP00000475900	27	33	1046	4.2218e-116	0.000157101	0.00699383	1.16172e+10
ENSP00000316029	ENSG00000137076	TLN1	talin 1 [Source:HGNC Symbol;Acc:HGNC:11845]		0.2247146792601338	6	ENSP00000303476,ENSP00000453508,ENSP00000453730,ENSP00000355028,ENSP00000316029,ENSP00000419981	34	39	245	1.68231e-186	0.000157101	0.00699383	4.3813e+09
ENSP00000316176	ENSG00000177889	UBE2N	ubiquitin-conjugating enzyme E2N [Source:HGNC Symbol;Acc:HGNC:12492]		0.17105263157894737	5	ENSP00000316176,ENSP00000449352,ENSP00000450260,ENSP00000447009,ENSP00000448352	3	3	18	7.19494e-09	0.000157101	0.00699383	5.77947e+07
ENSP00000316416	ENSG00000136488	CSH1	chorionic somatomammotropin hormone 1 (placental lactogen) [Source:HGNC Symbol;Acc:HGNC:2440]		0.43317972350230416	23	ENSP00000483369,ENSP00000480793,ENSP00000409294,ENSP00000339278,ENSP00000478652,ENSP00000316360,ENSP00000309524,ENSP00000478842,ENSP00000312673,ENSP00000343791,ENSP00000259003,ENSP00000453452,ENSP00000402517,ENSP00000376623,ENSP00000408486,ENSP00000316416,ENSP00000481086,ENSP00000338816,ENSP00000410618,ENSP00000376569,ENSP00000333268,ENSP00000402632,ENSP00000308396	4	9	132	1.87885e-17	0.000157101	0.00699383	2.11766e+08
ENSP00000316460	ENSG00000082074	FYB	FYN binding protein [Source:HGNC Symbol;Acc:HGNC:4036]		0.02554278416347382	4	ENSP00000426346,ENSP00000316460,ENSP00000427114,ENSP00000425845	1	1	1	0.000152858	0.000157101	0.00699383	NA
ENSP00000316491	ENSG00000162897	FCAMR	Fc receptor, IgA, IgM, high affinity [Source:HGNC Symbol;Acc:HGNC:24692]		0.03292894280762565	3	ENSP00000392707,ENSP00000383746,ENSP00000316491	2	2	5	0.000836396	0.000460765	0.0172042	5.67228e+06
ENSP00000316532	ENSG00000181291	TMEM132E	transmembrane protein 132E [Source:HGNC Symbol;Acc:HGNC:26991]		0.07317073170731707	1	ENSP00000316532	4	4	5	4.18285e-16	0.000157101	0.00699383	146860
ENSP00000316809	ENSG00000174238	PITPNA	phosphatidylinositol transfer protein, alpha [Source:HGNC Symbol;Acc:HGNC:9001]		0.2074074074074074	4	ENSP00000461011,ENSP00000441869,ENSP00000316809,ENSP00000461539	4	4	12	6.91349e-15	0.000157101	0.00699383	186142140
ENSP00000317128	ENSG00000004399	PLXND1	plexin D1 [Source:HGNC Symbol;Acc:HGNC:9107]		0.11792207792207793	3	ENSP00000317128,ENSP00000426241,ENSP00000423832	16	16	112	1.2322e-77	0.000157101	0.00699383	6.23718e+08
ENSP00000317232	ENSG00000141756	FKBP10	FK506 binding protein 10, 65 kDa [Source:HGNC Symbol;Acc:HGNC:18169]		0.11168384879725086	5	ENSP00000317232,ENSP00000466352,ENSP00000466097,ENSP00000416822,ENSP00000468703	7	7	21	1.41448e-13	0.000157101	0.00699383	1.77981e+07
ENSP00000317334	ENSG00000120438	TCP1	t-complex 1 [Source:HGNC Symbol;Acc:HGNC:11655]		0.22122302158273383	11	ENSP00000440617,ENSP00000444423,ENSP00000442185,ENSP00000439671,ENSP00000439447,ENSP00000442856,ENSP00000376008,ENSP00000317334,ENSP00000437840,ENSP00000390159,ENSP00000441345	9	9	51	1.66743e-32	0.000157101	0.00699383	57441836
ENSP00000317362	ENSG00000137509	PRCP	prolylcarboxypeptidase (angiotensinase C) [Source:HGNC Symbol;Acc:HGNC:9344]		0.11693548387096774	11	ENSP00000377055,ENSP00000437169,ENSP00000431559,ENSP00000431435,ENSP00000435071,ENSP00000317362,ENSP00000431496,ENSP00000432506,ENSP00000436141,ENSP00000432004,ENSP00000434771	5	5	40	7.15858e-24	0.000157101	0.00699383	162122460
ENSP00000317659	ENSG00000143774	GUK1	guanylate kinase 1 [Source:HGNC Symbol;Acc:HGNC:4693]		0.15228426395939088	13	ENSP00000355682,ENSP00000355677,ENSP00000401832,ENSP00000355679,ENSP00000355684,ENSP00000355689,ENSP00000403664,ENSP00000355691,ENSP00000355687,ENSP00000375738,ENSP00000407604,ENSP00000317659,ENSP00000355683	3	3	11	9.85481e-06	0.000460765	0.0172042	4.28537e+07
ENSP00000317788	ENSG00000165119	HNRNPK	heterogeneous nuclear ribonucleoprotein K [Source:HGNC Symbol;Acc:HGNC:5044]		0.14038876889848811	6	ENSP00000353552,ENSP00000365458,ENSP00000317788,ENSP00000365439,ENSP00000409456,ENSP00000473957	5	5	11	6.39695e-13	0.000157101	0.00699383	1.79408e+07
ENSP00000317842	ENSG00000172831	CES2	carboxylesterase 2 [Source:HGNC Symbol;Acc:HGNC:1864]		0.051364365971107544	3	ENSP00000317842,ENSP00000394452,ENSP00000464620	3	3	30	4.34288e-07	0.000460765	0.0172042	384903942
ENSP00000318297	ENSG00000175792	RUVBL1	RuvB-like AAA ATPase 1 [Source:HGNC Symbol;Acc:HGNC:10474]		0.04824561403508772	2	ENSP00000318297,ENSP00000420738	2	2	5	8.49445e-05	0.000460765	0.0172042	4138944
ENSP00000318328	ENSG00000140538	NTRK3	neurotrophic tyrosine kinase, receptor, type 3 [Source:HGNC Symbol;Acc:HGNC:8033]		0.016339869281045753	11	ENSP00000437773,ENSP00000486784,ENSP00000453959,ENSP00000485864,ENSP00000453511,ENSP00000347397,ENSP00000444673,ENSP00000350356,ENSP00000377990,ENSP00000354207,ENSP00000318328	1	1	10	0.00330675	0.000460765	0.0172042	5.08226e+06
ENSP00000318804	ENSG00000176390	CRLF3	cytokine receptor-like factor 3 [Source:HGNC Symbol;Acc:HGNC:17177]		0.12217194570135746	2	ENSP00000318804,ENSP00000462643	4	4	11	6.89651e-12	0.000157101	0.00699383	1.48452e+07
ENSP00000318912	ENSG00000185015	CA13	carbonic anhydrase XIII [Source:HGNC Symbol;Acc:HGNC:14914]		0.03435114503816794	1	ENSP00000318912	1	1	3	0.0416817	0.00287992	0.0716254	1317148
ENSP00000319096	ENSG00000181467	RAP2B	RAP2B, member of RAS oncogene family [Source:HGNC Symbol;Acc:HGNC:9862]		0.06557377049180328	1	ENSP00000319096	1	1	6	0.00848575	0.00101792	0.0312306	2282706
[truncated: 1,610 more rows]

## Sheet: HiRIEF_merge all peptides
Peptide sequence	Protein(s)	Gene(s)	Associated gene ID(s)	Description(s)	HiRIEF-Unique gene	Coverage(s)	# proteins in group	q-value	PEP	# PSMs	MS1 area (highest of all PSMs)
[truncated: 23,107 more rows]

## Sheet: HiRIEF_611_unique_PSM
Peptide sequence	Gene ID(s)	psm q-value	peptide q-value	File	Scan number
[truncated: 40,552 more rows]

## Sheet: PPA2017 unique
ENSG00000003056
ENSG00000004059
ENSG00000004455
ENSG00000004776
ENSG00000005007
[truncated: 1,082 more rows]

## Sheet: 751 affinity assay unique
ENSG00000101282
[truncated: 750 more rows]

[truncated: 1 more sheets: GO HiRIEF_611_unique]
