# Supplementary material for: In-depth human plasma proteome analysis captures tissue proteins and transfer of protein variants across the placenta
Source: eLife. 2019 Apr 8;8:e41608. doi: 10.7554/eLife.41608 (PMC6519984; doi:10.7554/eLife.41608)
Supplement: Supplementary file 7. [file elife-41608-supp7.xlsx]

## Sheet: CancerSEEK
CancerSEEK (Cohen et al)	"In-depth human plasma proteome analysis.."					PeptideAtlas2017
		Detected in optimisation samples	Detected in "30 cohort"	ENSG		Gene_Name	nextprot_accession	Ensembl_Accession	RefSeq_Accession	Chromosome	Start	End	n_neXtProt_entry	Protein_existence	PeptideAtlas_Category	nobs	Description
Myeloperoxidase		yes	yes	ENSG00000005381		MPO	P05164	ENSG00000005381	NP_000241	17q22	58269856	58280935	1	protein level	canonical	48	Myeloperoxidase
CA-125		yes	no	ENSG00000181143
Prolactin		yes	no	ENSG00000172179		PRL	P01236	ENSG00000172179	NP_001157030	6p22.3	22287244	22297501	1	protein level	canonical	15	Prolactin
OPN		yes	yes	ENSG00000118785		SPP1	P10451	ENSG00000118785	NP_001238759	4q22.1	87975650	87983426	1	protein level	canonical	34	Osteopontin
TIMP-1		yes	yes	ENSG00000102265		TIMP1	P01033	ENSG00000102265	NP_003245	Xp11.3	47582313	47586789	1	protein level	canonical	48	Metalloproteinase inhibitor 1
HGF		no	no	ENSG00000019991
CEA		no	no	ENSG00000105388		CEACAM5	P06731	ENSG00000105388	NP_004354	19q13.2	41708585	41729798	1	protein level	canonical	16	Carcinoembryonic antigen-related cell adhesion molecule 5
CA19-9		no	no
