# Supplementary material for: In-depth human plasma proteome analysis captures tissue proteins and transfer of protein variants across the placenta
Source: eLife. 2019 Apr 8;8:e41608. doi: 10.7554/eLife.41608 (PMC6519984; doi:10.7554/eLife.41608)
Supplement: Supplementary file 11. [file elife-41608-supp11.xlsx]

## Sheet: Sheet1
Gene	Direction of transfer	Mother/Baby pair	Transferred peptide	baby genotype	mom genotype	SNP ID	amino acid change	High frequency peptide	High freq. baby #PSM	High freq. mom #PSM	Variant Peptide w SAAV	baby SAAV #PSMs	mom SAAV #PSMs
C3	b>m	b>m_SO	SAAV	hetreo_snp	wild_type	rs1047286	P>L	VLLDGVQNPR	41	93	VLLDGVQNLR	38	3
C7	b>m	b>m_ST	SAAV	hetreo_snp	wild_type	rs60714178	T>S	NVVYTCNEGYSLIGNPVAR	52	52	NVVYSC+57.021NEGYSLIGNPVAR	47	4
GAA	b>m	b>m_SO	SAAV	hetreo_snp	wild_type	rs1042395	R>H	APSPLYSVEFSEEPFGVIVRR			APSPLYSVEFSEEPFGVIVHR	3	2
GAA	b>m	b>m_ST	SAAV	hetreo_snp	wild_type	rs1800309	E>K	NHNSLLSLPQEPYSFSE			NHNSLLSLPQEPYSFSK	1	2
GAA	b>m	b>m_ST	SAAV	hetreo_snp	wild_type	rs1042395	R>H	APSPLYSVEFSEEPFGVIVRR			APSPLYSVEFSEEPFGVIVHR	1	2
HRG	b>m	b>m_SO	SAAV	hetreo_snp	wild_type	rs1042464	N>I	HPLKPDNQPFPQSVSESCPGK	13	97	HPLKPDIQPFPQSVSESC+57.021PGK	16	1
LNPEP*	b>m	b>m_SO	SAAV	hetreo_snp	wild_type	rs11746232	I>V	FPLGSYTIQNIVAGSTYLFSTK	1	3	FPLGSYTVQNIVAGSTYLFSTK	1	6
LRG1	b>m	b>m_SO	SAAV	hetreo_snp	wild_type	rs966384	P>S	NALTGLPPGLFQASATLDTLVLK	41	59	NALTGLPSGLFQASATLDTLVLK	26	1
LRG1	b>m	b>m_ST	SAAV	hetreo_snp	wild_type	rs966384	P>S	NALTGLPPGLFQASATLDTLVLK	47	77	NALTGLPSGLFQASATLDTLVLK	34	3
PTPRG	b>m	b>m_ST	SAAV	hetreo_snp	wild_type	rs62620047	Y>H	HQSPIDILDQYAR	5	6	HQSPIDILDQHAR	2	1
SVEP1	b>m	b>m_ST	SAAV	hetero_snp_rev	wild_type	rs7030192	A>V	PGHILAGSDLR			PGHILVGSDLR	3	13
APOH	b>m	b>m_SO	wt	hetreo_snp	homo_snp	rs1801690	W>S	EHSSLAFWK	24	25	EHSSLAFSK	16
C14orf37	b>m	b>m_ST	wt	hetreo_snp	homo_snp	rs61741193	E>D	LGDNEETQVR	1	1	LGDNEDTQVR	1
KRT2	b>m	b>m_SO	wt	hetreo_snp	homo_snp	rs2634041	S>G	GGGFGGGSSFGGGSGFSGGGFGGGGFGGGR	15	12	GGGFGGGSGFGGGSGFSGGGFGGGGFGGGR	1
LTF*	b>m	b>m_ST	wt	hetreo_snp	homo_snp	rs2073495	E>D	DVTVLQNTDGNNNEAWAK	1	1	DVTVLQNTDGNNNDAWAK	1
SERPINF1	b>m	b>m_ST	wt	hetreo_snp	homo_snp	rs1136287	T>M	SSTSPTTNVLLSPLSVATALSALSLGAEQR	12	1	SSM+15.995SPTTNVLLSPLSVATALSALSLGAEQR	13	29
SERPINF1	b>m	b>m_ST	wt	hetreo_snp	homo_snp	rs1136287	T>M	SSTSPTTNVLLSPLSVATALSALSLGAEQR	12	1	SSMSPTTNVLLSPLSVATALSALSLGAEQR	1	2
APOB*	m<>b	b>m_ST	SAAV	hetreo_snp	wild_type	rs676210	P>L	LPEIAIPEFIIPTLNLNDFQVPDLHIPEFQLPHISHTIEVPTFGK	5	28	LPEIAIPEFIIPTLNLNDFQVPDLHILEFQLPHISHTIEVPTFGK	8	7
APOB	m<>b	m>b_SO	SAAV	wild_type	hetreo_snp	rs676210	P>L	LPEIAIPEFIIPTLNLNDFQVPDLHIPEFQLPHISHTIEVPTFGK	16	16	LPEIAIPEFIIPTLNLNDFQVPDLHILEFQLPHISHTIEVPTFGK	2	11
SERPINB11	m<>b	b>m_ST	SAAV	hetreo_snp	wild_type	rs1506418	A>T	VLVNTAYFK			VLVNTIYFK	4	2
SERPINB11	m<>b	m>b_SO	SAAV	wild_type	hetreo_snp	rs1506418	A>T	VLVNTAYFK			VLVNTIYFK	5	2
AGT	m>b	m>b_SO	SAAV	wild_type	hetreo_snp	rs699	M>T	TGCSLMGASVDSTLAFNTYVHFQGK	333	163	TGC+57.021SLTGASVDSTLAFNTYVHFQGK	34	230
CLEC3B	m>b	m>b_ST	SAAV	wild_type	hetreo_snp	rs13963	G>S	GGTLGTPQTGSENDALYEYLR	18	8	GGTLSTPQTGSENDALYEYLR	4	7
FGFBP2	m>b	m>b_SO	SAAV	wild_type	hetreo_snp	rs35496730	S>N	QGSTGEEFHFQTGGR	4	6	QGNTGEEFHFQTGGR	1	4
HSPG2	m>b	m>b_SO	SAAV	wild_type	hetreo_snp	rs1138469	V>I	GSVYIGGAPDVATLTGGR	24	2	GSIYIGGAPDVATLTGGR	1	2
HSPG2	m>b	m>b_ST	SAAV	wild_type	hetreo_snp	rs1138469	V>I	GSVYIGGAPDVATLTGGR	15	2	GSIYIGGAPDVATLTGGR	1	2
PIGR	m>b	m>b_SO	SAAV	wild_type	hetreo_snp	rs2275531	G>S	GVAGGSVAVLCPYNR	3	3	GVAGSSVAVLC+57.021PYNR	1	1
SERPING1*	m>b	m>b_ST	SAAV	wild_type	hetreo_snp	rs4926	V>M	TLLVFEVQQPFLFVLWDQQHK	9	4	TLLVFEVQQPFLFM+15.995LWDQQHK	1	4
SERPING1	m>b	m>b_ST	SAAV	wild_type	hetreo_snp	rs4926	V>M	TLLVFEVQQPFLFVLWDQQHK	9	4	TLLVFEVQQPFLFMLWDQQHK	25	6
C1RL	m>b	m>b_SO	wt	homo_snp_rev	hetero_snp_rev	rs3742089	I>V	WILTAAHTIYPK	1	6	WILTAAHTVYPK	6	5
C4BPA*	m>b	m>b_SO	wt	homo_snp	hetreo_snp	rs4844573	I>T	WNPSPPACEPNSCINLPDIPHASWETYPRPTK	2	36	WNPSPPAC+57.021EPNSC+57.021TNLPDIPHASWETYPRPTK	4	25
RELN	m>b	m>b_ST	wt	homo_snp	hetreo_snp	rs362691	L>V	VIVLLPQK	2	2	VIVVLPQK		2
*peptides that did not pass manual inspection
