# Supplementary figures and images for: In-depth human plasma proteome analysis captures tissue proteins and transfer of protein variants across the placenta
Source: eLife journal article supplement (doi:10.7554/elife.41608), 2019-04-08

**a**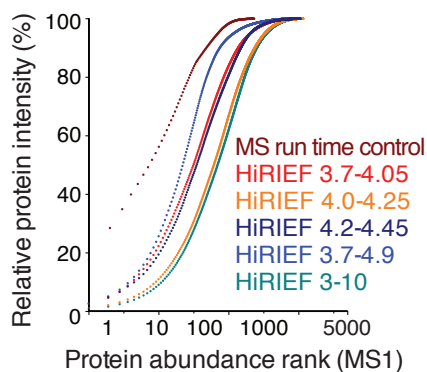**b**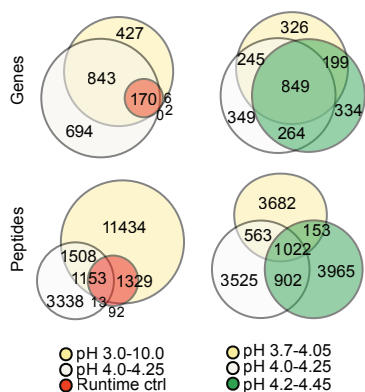**c**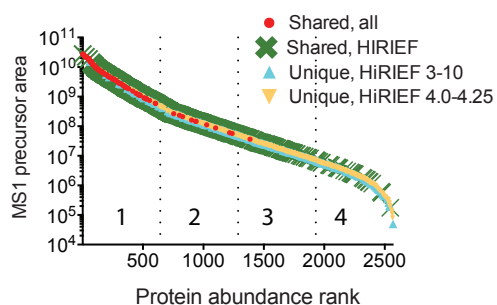**d**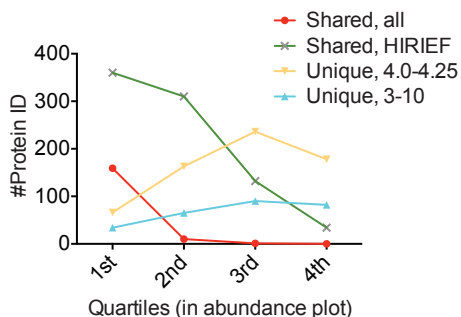**e**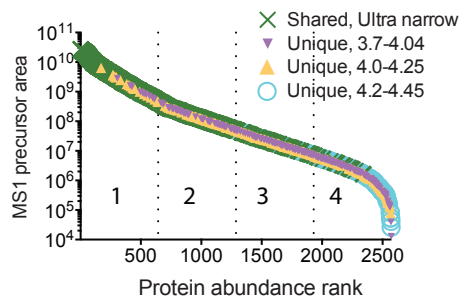**f**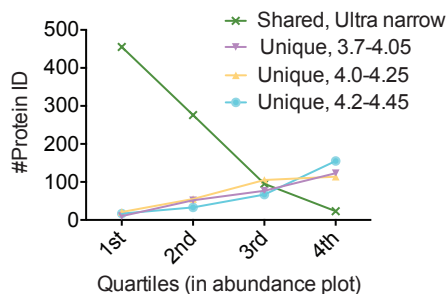**g**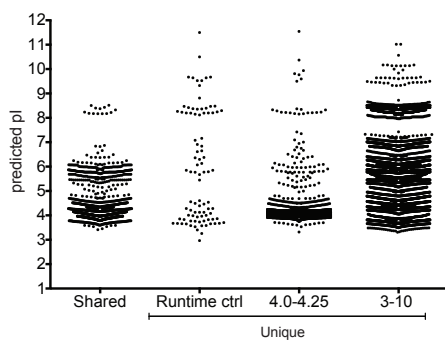**h**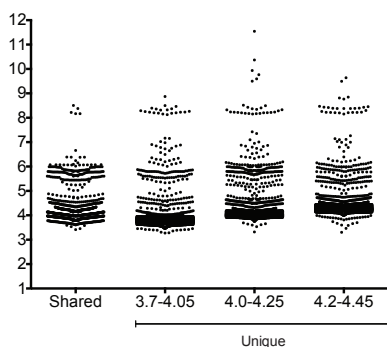

Supplement: supp [file elife_poa_e41608_Figure_1_figure_supplement_1.pdf › elife_poa_e41608_Figure_1_figure_supplement_1.pdf]

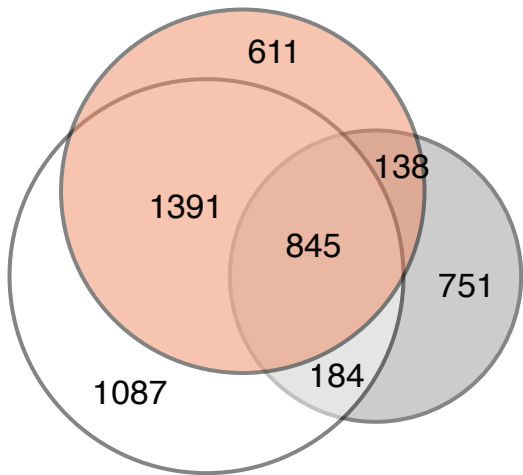

- HiRIEF-MS Plasma
- Plasma PeptideAtlas2017
- Affinity Proteomics Assays

Supplement: supp [file elife_poa_e41608_Figure_1_figure_supplement_2.pdf › elife_poa_e41608_Figure_1_figure_supplement_2.pdf]

Plasma

Cell line

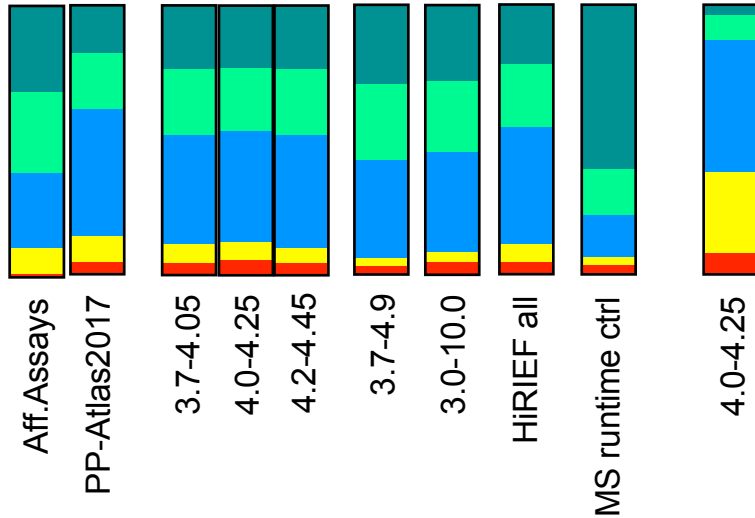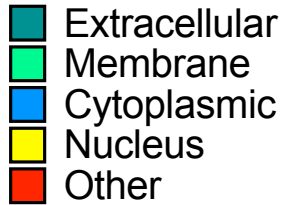

Supplement: supp [file elife_poa_e41608_Figure_1_figure_supplement_3.pdf › elife_poa_e41608_Figure_1_figure_supplement_3.pdf]

**A**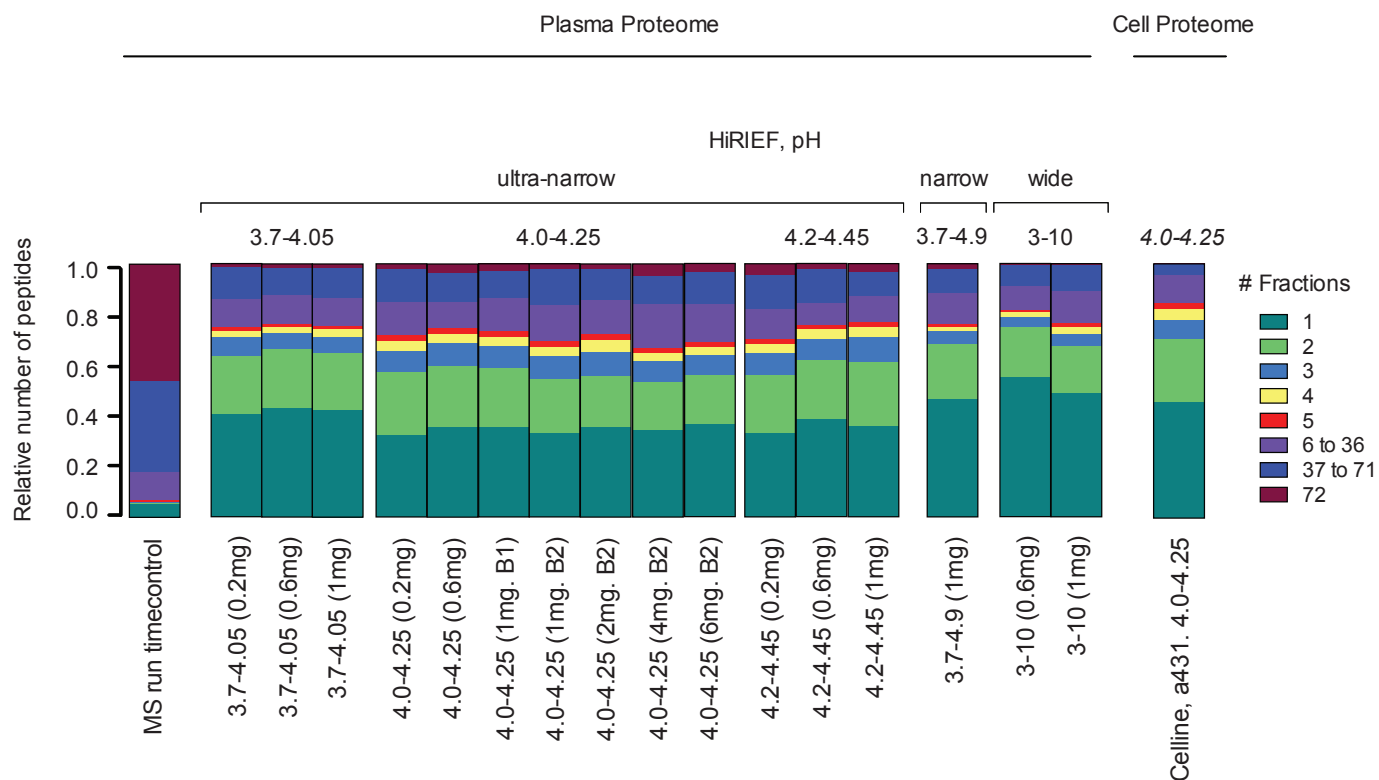**B**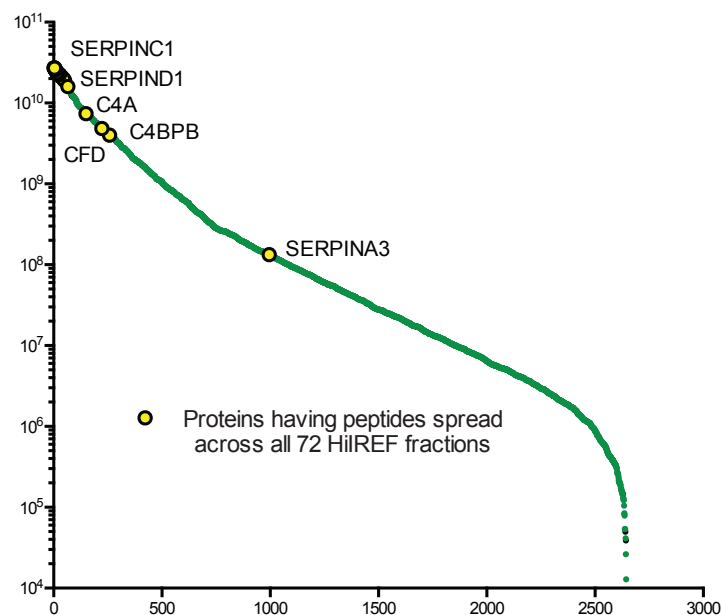

Supplement: supp [file elife_poa_e41608_Figure_1_figure_supplement_5.pdf › elife_poa_e41608_Figure_1_figure_supplement_5.pdf]

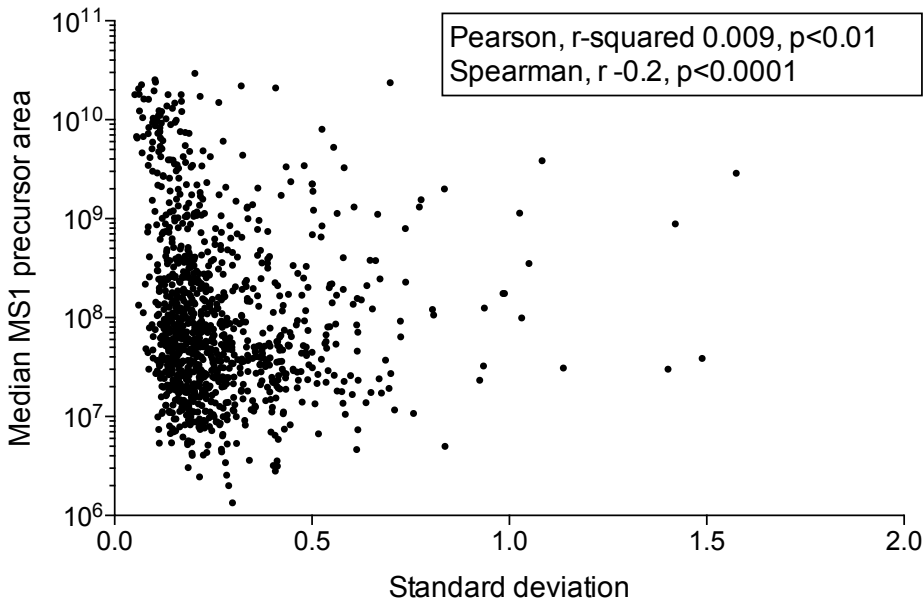

Supplement: supp [file elife_poa_e41608_Figure_2_figure_supplement_1.pdf › elife_poa_e41608_Figure_2_figure_supplement_1.pdf]

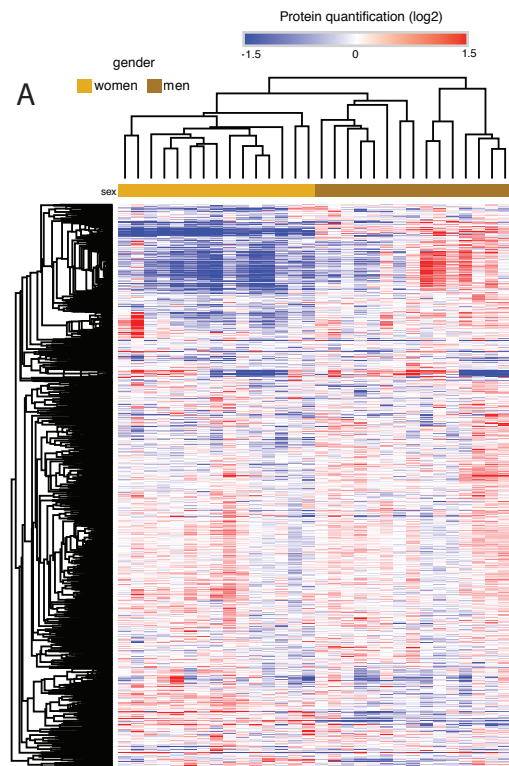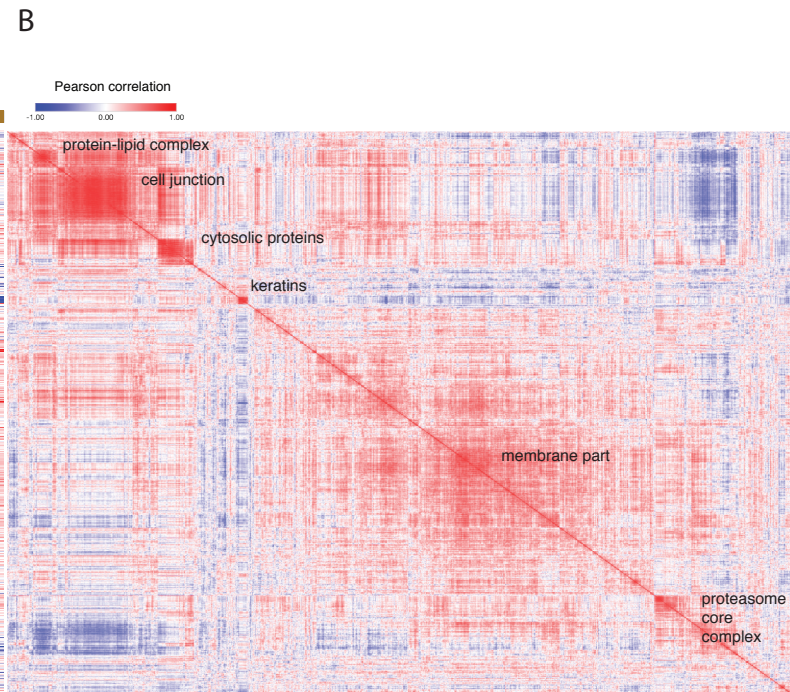

Supplement: supp [file elife_poa_e41608_Figure_2_figure_supplement_2.pdf › elife_poa_e41608_Figure_2_figure_supplement_2.pdf]

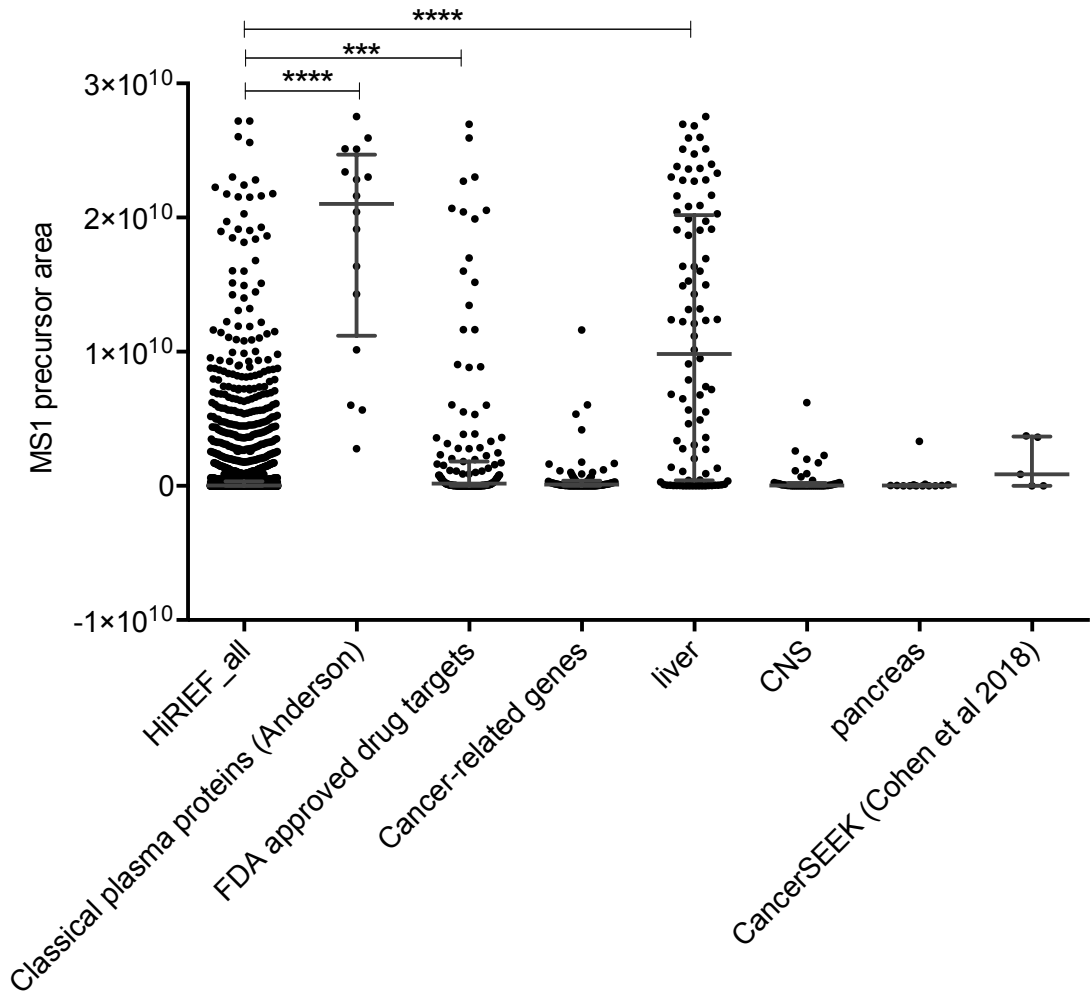

Supplement: supp [file elife_poa_e41608_Figure_3_figure_supplement_1.pdf › elife_poa_e41608_Figure_3_figure_supplement_1.pdf]

# Transfer

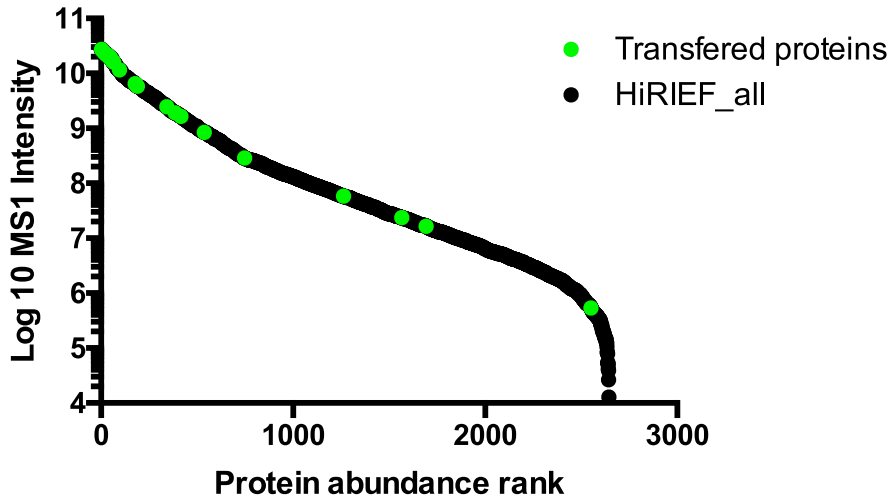

Supplement: supp [file elife_poa_e41608_Figure_4_figure_supplement_1.pdf › elife_poa_e41608_Figure_4_figure_supplement_1.pdf]
